# Supplementary material for: Rapid growth of new atmospheric particles by nitric acid and ammonia condensation
Source: Nature. 2020 May 13;581(7807):184–9. doi: 10.1038/s41586-020-2270-4 (PMC7334196; doi:10.1038/s41586-020-2270-4)
Supplement: Supplementary file 1 — Source Data Fig. 1 [file 41586_2020_2270_MOESM1_ESM.xlsx]

## Sheet: a
d N/d logd_p (cm^-3)
	d_p (nm)	1.8	2.31562	2.34484	2.3744	2.40427	2.43445	2.46493	2.4957	2.5268	2.55835	2.59033	2.62277	2.65567	2.68903	2.72287	2.7572	2.79202	2.82734	2.86317	2.89952	2.93639	2.9738	3.01175	3.05016	3.08903	3.12835	3.16813	3.20837	3.24907	3.29025	3.33189	3.37401	3.41661	3.45969	3.50326	3.54732	3.59187	3.63691	3.68246	3.7285	3.77506	3.82212	3.8697	3.9178	3.96642	4.01556	4.06533	4.11576
Time (min)		1.8	2.31562	2.34484	2.3744	2.40427	2.43445	2.46493	2.4957	2.5268	2.55835	2.59033	2.62277	2.65567	2.68903	2.72287	2.7572	2.79202	2.82734	2.86317	2.89952	2.93639	2.9738	3.01175	3.05016	3.08903	3.12835	3.16813	3.20837	3.24907	3.29025	3.33189	3.37401	3.41661	3.45969	3.50326	3.54732	3.59187	3.63691	3.68246	3.7285	3.77506	3.82212	3.8697	3.9178	3.96642	4.01556	4.06533	4.11576
0	0	294656	827440	794581	758753	720464	680218	638515	595845	552688	509510	466753	424828	384111	344933	307582	272298	239271	208639	180489	154859	131738	111073	92774.1	76721.1	62772.4	50771.2	40552.1	31945	25236.4	20102.7	15740	12071.3	9022.57	6523.38	4507.31	2912.29	1680.55	758.48	96.3936	1	1	1	1	1	1	1	2.70966	8.92473
5.28333	5.28333	4.7653e+06	3.54334e+06	3.56068e+06	3.58433e+06	3.61348e+06	3.64704e+06	3.68374e+06	3.72228e+06	3.76137e+06	3.79991e+06	3.83692e+06	3.87165e+06	3.90355e+06	3.93226e+06	3.95757e+06	3.97935e+06	3.99752e+06	4.01198e+06	4.02254e+06	4.02891e+06	4.0307e+06	4.02737e+06	4.01835e+06	4.00299e+06	3.98063e+06	3.95067e+06	3.91258e+06	3.86594e+06	3.81044e+06	3.74592e+06	3.67234e+06	3.58981e+06	3.49858e+06	3.39905e+06	3.29177e+06	3.17744e+06	3.05687e+06	2.93101e+06	2.80084e+06	2.66739e+06	2.53169e+06	2.39468e+06	2.25731e+06	2.12043e+06	1.98485e+06	1.85133e+06	1.72078e+06	1.59394e+06
10.5667	10.5667	3.02112e+06	1.38281e+06	1.4357e+06	1.48987e+06	1.54538e+06	1.60228e+06	1.6606e+06	1.72043e+06	1.78188e+06	1.84515e+06	1.91053e+06	1.97839e+06	2.0492e+06	2.12346e+06	2.2017e+06	2.28441e+06	2.37204e+06	2.46489e+06	2.56312e+06	2.66666e+06	2.77526e+06	2.88841e+06	3.00541e+06	3.12533e+06	3.24709e+06	3.36946e+06	3.49113e+06	3.61071e+06	3.72678e+06	3.83792e+06	3.94271e+06	4.03974e+06	4.12768e+06	4.20524e+06	4.27125e+06	4.32466e+06	4.36456e+06	4.39023e+06	4.4011e+06	4.39681e+06	4.37715e+06	4.34209e+06	4.2918e+06	4.22659e+06	4.14695e+06	4.05353e+06	3.94709e+06	3.82856e+06
12.45	12.45	1.95847e+06	1.36523e+06	1.3862e+06	1.40574e+06	1.42377e+06	1.44026e+06	1.45524e+06	1.46882e+06	1.48117e+06	1.49255e+06	1.50327e+06	1.51371e+06	1.52429e+06	1.53544e+06	1.54765e+06	1.5614e+06	1.57721e+06	1.59561e+06	1.61713e+06	1.64231e+06	1.67164e+06	1.70558e+06	1.7445e+06	1.78869e+06	1.83832e+06	1.89343e+06	1.95397e+06	2.01971e+06	2.09033e+06	2.16537e+06	2.24426e+06	2.32629e+06	2.41065e+06	2.49645e+06	2.5827e+06	2.66837e+06	2.7524e+06	2.83373e+06	2.9113e+06	2.98412e+06	3.05129e+06	3.11196e+06	3.16546e+06	3.2112e+06	3.24876e+06	3.27782e+06	3.29818e+06	3.30972e+06
17.7833	17.7833	1.58104e+06	1.42174e+06	1.39857e+06	1.37456e+06	1.3506e+06	1.32734e+06	1.30532e+06	1.28487e+06	1.26622e+06	1.24948e+06	1.23466e+06	1.22171e+06	1.2105e+06	1.20089e+06	1.19271e+06	1.18582e+06	1.1801e+06	1.17549e+06	1.17197e+06	1.16958e+06	1.16842e+06	1.16862e+06	1.17034e+06	1.17376e+06	1.17901e+06	1.18623e+06	1.19549e+06	1.20681e+06	1.22015e+06	1.2354e+06	1.25242e+06	1.27103e+06	1.29108e+06	1.31237e+06	1.33479e+06	1.35823e+06	1.38265e+06	1.40803e+06	1.43442e+06	1.46187e+06	1.49047e+06	1.52032e+06	1.55153e+06	1.58423e+06	1.61851e+06	1.65446e+06	1.69214e+06	1.73151e+06
23.0667	23.0667	1.50829e+06	1.19734e+06	1.18908e+06	1.17941e+06	1.16892e+06	1.15814e+06	1.14747e+06	1.13725e+06	1.12773e+06	1.11905e+06	1.11131e+06	1.10452e+06	1.09865e+06	1.09362e+06	1.08933e+06	1.08566e+06	1.08251e+06	1.07981e+06	1.07749e+06	1.07551e+06	1.07383e+06	1.07244e+06	1.07129e+06	1.07035e+06	1.06959e+06	1.06895e+06	1.06839e+06	1.06786e+06	1.06732e+06	1.06673e+06	1.06607e+06	1.06531e+06	1.06445e+06	1.06349e+06	1.06243e+06	1.06129e+06	1.06009e+06	1.05885e+06	1.0576e+06	1.05637e+06	1.05521e+06	1.05418e+06	1.05337e+06	1.05292e+06	1.053e+06	1.05382e+06	1.05561e+06	1.05862e+06
28.35	28.35	1.4348e+06	1.25927e+06	1.2512e+06	1.24043e+06	1.22758e+06	1.21322e+06	1.19787e+06	1.18201e+06	1.16602e+06	1.15026e+06	1.135e+06	1.12047e+06	1.10685e+06	1.09425e+06	1.08277e+06	1.07247e+06	1.06338e+06	1.05552e+06	1.04888e+06	1.04342e+06	1.03909e+06	1.03579e+06	1.03342e+06	1.03185e+06	1.03093e+06	1.03051e+06	1.03048e+06	1.03068e+06	1.03101e+06	1.03133e+06	1.03153e+06	1.03151e+06	1.03115e+06	1.03035e+06	1.029e+06	1.027e+06	1.02427e+06	1.02072e+06	1.01628e+06	1.0109e+06	1.00452e+06	997130	988724	979331	969012	957861	946006	933608
[truncated: 151 more columns]

## Sheet: b
d N/d logd_p (cm^-3)
	d_p (nm)	1.8	2.21217	2.62277	2.65567	2.68903	2.72287	2.7572	2.79202	2.82734	2.86317	2.89952	2.93639	2.9738	3.01175	3.05016	3.08903	3.12835	3.16813	3.20837	3.24907	3.29025	3.33189	3.37401	3.41661	3.45969	3.50326	3.54732	3.59187	3.63691	3.68246	3.7285	3.77506	3.82212	3.8697	3.9178	3.96642	4.01556	4.06533	4.11576	4.16688	4.21871	4.27126	4.32457	4.37864	4.43351	4.48919	4.54571	4.60308
Time (min)			2.21217	2.62277	2.65567	2.68903	2.72287			2.82734	2.86317	2.89952	2.93639	2.9738	3.01175	3.05016	3.08903	3.12835	3.16813	3.20837	3.24907	3.29025	3.33189	3.37401	3.41661	3.45969	3.50326	3.54732	3.59187	3.63691	3.68246	3.7285	3.77506	3.82212	3.8697	3.9178	3.96642	4.01556	4.06533	4.11576	4.16688	4.21871	4.27126	4.32457	4.37864	4.43351	4.48919	4.54571	4.60308
0		5025.74	1	52451.6	47551.5	42845.9	38423.2	34460.4	30676.2	27093.8	23731.7	20604.7	17724.3	15098.1	12729.9	10619.2	8760.95	7146.26	5762.66	4594.72	3624.68	2833.11	2199.6	1873.05	1696.78	1523.09	1353	1187.8	1028.95	877.921	736.149	604.884	485.155	377.73	283.1	201.483	132.835	76.8473	32.9552	1	1	1	1	1	1	1	1	1	1
5.28333		2.43503e+06	860190	1.75799e+06	1.63973e+06	1.52152e+06	1.40475e+06	1.29066e+06	1.18032e+06	1.0746e+06	974192	879558	790985	708581	632310	562024	497498	438465	384640	335733	291459	251652	216237	184447	156431	131813	109922	90621.7	73763.7	59193.3	46745.2	36381.5	28119	21232.2	15575.5	11004.1	7377.15	4617.49	2720.53	1304.64	288.859	1	1	1	1	1	1	1	1
10.5667		4.87684e+06	4.06759e+06	3.49364e+06	3.46363e+06	3.4252e+06	3.37848e+06	3.32372e+06	3.26127e+06	3.19159e+06	3.11519e+06	3.03266e+06	2.94458e+06	2.85158e+06	2.75425e+06	2.6532e+06	2.54901e+06	2.44229e+06	2.33364e+06	2.22367e+06	2.11294e+06	2.00199e+06	1.89129e+06	1.78131e+06	1.67244e+06	1.56507e+06	1.45958e+06	1.35631e+06	1.25561e+06	1.15782e+06	1.06324e+06	972154	884811	801434	722215	647325	576908	511085	449941	393524	341835	294829	252415	214455	180769	151144	125336	103207	84557.8
15.85		3.35814e+06	4.37797e+06	2.2333e+06	2.26973e+06	2.30429e+06	2.33702e+06	2.36796e+06	2.39714e+06	2.42455e+06	2.45014e+06	2.47378e+06	2.49526e+06	2.51429e+06	2.53047e+06	2.54336e+06	2.55244e+06	2.55717e+06	2.55703e+06	2.55151e+06	2.54013e+06	2.52248e+06	2.49824e+06	2.46714e+06	2.42902e+06	2.38382e+06	2.33158e+06	2.27245e+06	2.20669e+06	2.13469e+06	2.05691e+06	1.97391e+06	1.88635e+06	1.79491e+06	1.70037e+06	1.60354e+06	1.50524e+06	1.40633e+06	1.30765e+06	1.21004e+06	1.11428e+06	1.02112e+06	931223	845186	763518	686634	614852	548393	487378
21.1333		1.80063e+06	2.46968e+06	1.28351e+06	1.29651e+06	1.30992e+06	1.32412e+06	1.33945e+06	1.35622e+06	1.37468e+06	1.39503e+06	1.41737e+06	1.4417e+06	1.46793e+06	1.49585e+06	1.52516e+06	1.55545e+06	1.58624e+06	1.61695e+06	1.64698e+06	1.67568e+06	1.70235e+06	1.7263e+06	1.74684e+06	1.76331e+06	1.77507e+06	1.78155e+06	1.78227e+06	1.77681e+06	1.76489e+06	1.74633e+06	1.72108e+06	1.6892e+06	1.65089e+06	1.60647e+06	1.55638e+06	1.50116e+06	1.44143e+06	1.37789e+06	1.31129e+06	1.2424e+06	1.17201e+06	1.10089e+06	1.0298e+06	959449	890477	823467	758919	697246
26.4167		1.17753e+06	1.43111e+06	807316	807309	806878	806400	806263	806853	808543	811678	816567	823473	832604	844105	858056	874468	893280	914356	937489	962396	988722	1.01604e+06	1.04386e+06	1.07165e+06	1.09882e+06	1.12477e+06	1.14888e+06	1.17055e+06	1.1892e+06	1.2043e+06	1.21538e+06	1.22203e+06	1.22392e+06	1.22082e+06	1.21261e+06	1.19925e+06	1.18083e+06	1.15753e+06	1.12961e+06	1.09746e+06	1.06151e+06	1.02226e+06	980282	936140	890423	843705	796532	749407
31.7		834647	889883	526181	519531	512671	505877	499425	493588	488626	484784	482284	481324	482070	484658	489195	495757	504392	515119	527928	542774	559575	578198	598460	620121	642883	666393	690250	714018	737233	759425	780127	798890	815297	828976	839609	846937	850768	850980	847519	840403	829719	815623	798329	778101	755245	730094	702995	674301
36.9833		568830	542745	374498	367476	360375	353363	346606	340265	334483	329385	325075	321633	319117	317568	317010	317462	318939	321455	325025	329664	335382	342182	350052	358963	368868	379702	391378	403795	416829	430340	444169	458140	472058	485714	498883	511331	522815	533091	541917	549068	554341	557571	558624	557410	553879	548017	539849	529433
42.2667		451840	385724	295213	286962	278629	270321	262146	254207	246599	239408	232702	226535	220952	215986	211671	208040	205136	203010	201720	201327	201892	203467	206090	209782	214540	220338	227128	234839	243384	252656	262538	272901	283608	294517	305480	316346	326963	337177	346837	355797	363922	371090	377193	382135	385834	388212	389199	388728
47.55		379292	296393	245262	235980	226853	217967	209404	201237	193527	186320	179649	173530	167969	162962	158501	154577	151187	148332	146025	144283	143129	142587	142679	143419	144816	146868	149562	152880	156793	161271	166275	171765	177699	184035	190727	197727	204983	212433	220011	227642	235244	242728	250001	256963	263505	269511	274858	279416
52.8333		314724	234527	202180	193257	184683	176488	168703	161353	154461	148048	142128	136710	131795	127377	123440	119962	116923	114299	112072	110224	108740	107610	106825	106377	106262	106476	107014	107874	109054	110552	112371	114514	116986	119797	122959	126485	130387	134670	139327	144344	149692	155330	161199	167230	173335	179412	185345	191006
58.1167		288308	194187	188144	178756	169937	161693	154017	146891	140296	134208	128603	123455	118737	114418	110465	106846	103533	100506	97753.4	95269.5	93050.4	91095.4	89405.2	87980.5	86820.7	85924.1	85286.8	84902.7	84763.7	84860	85181.1	85716.6	86458	87400.7	88546.4	89904.2	91488.1	93313.5	95395	97746.6	100381	103307	106526	110030	113800	117800	121980	126271
[truncated: 142 more columns]

## Sheet: c
T (°C)	[HNO3]×[NH3] (pptv^2)	GR (nm/h)	GR_err (nm/h)
+5	223074	25.32	3.14
+5	234643	26	11.16
+5	275203	34.22	5.19
+5	578613	200.45	45.09
+5	488515	350.28	75.83
+5	986146	657.42	35.63
-10	50892.6	25.65	1.22
-10	41640.2	26.6	1.22
-10	27150.3	29.39	1.41
-10	50236.5	34.6	3.12
-10	50869.3	40.01	2.4
-10	41574.4	40.54	2.77
-10	109643	113.41	40.22
-10	152111	495.6	241.54
-10	155993	611.97	158.25
-10	247143	1814.26	302.73
