# Supplementary material for: Rapid growth of new atmospheric particles by nitric acid and ammonia condensation
Source: Nature. 2020 May 13;581(7807):184–9. doi: 10.1038/s41586-020-2270-4 (PMC7334196; doi:10.1038/s41586-020-2270-4)
Supplement: Supplementary file 2 — Source Data Fig. 2 [file 41586_2020_2270_MOESM2_ESM.xlsx]

## Sheet: a
Time (min)	HNO3 (pptv)		Time (min)	NH3 (pptv)		Time (min)	H2SO4 (pptv)
-12	980.852		-10	668.603		-10	0.00423675
-7	1073.14		-9	677.153		-9.98333	0.004241
-2	1105.59		-8	661.221		-9.96667	0.00423765
3	1205.84		-7	668.093		-9.95	0.00419057
8	1097.13		-6	645.354		-9.93333	0.00414747
13	894.318		-5	655.457		-9.91667	0.00439695
18	893.431		-4	653.537		-9.88333	0.00464366
23	904.908		-3	654.815		-9.86667	0.00459206
28	929.172		-2	634.487		-9.85	0.00457461
33	937.656		-1	646.632		-9.83333	0.00461689
38	820.605		0	638.895		-9.81667	0.00457714
			1	639.687		-9.8	0.00453784
			2	627.055		-9.78333	0.00453318
			3	617.738		-9.76667	0.0045489
			4	606.559		-9.75	0.00450171
			5	622.627		-9.73333	0.00457198
			6	616.153		-9.71667	0.00464148
			7	606.896		-9.7	0.0047525
			8	594.63		-9.68333	0.00470383
			9	597.72		-9.66667	0.00465234
			10	586.62		-9.65	0.0046614
			11	547.82		-9.63333	0.00467037
			12	509.697		-9.61667	0.0047142
			13	486.758		-9.6	0.00478993
			14	462.372		-9.58333	0.00477633
			15	450.102		-9.56667	0.00485977
			16	442.116		-9.55	0.00494228
			17	436.119		-9.53333	0.00505491
			18	445.612		-9.51667	0.00502707
			19	437.8		-9.5	0.00497121
			20	441.791		-9.48333	0.00509499
			21	435.033		-9.46667	0.0052174
			22	425.335		-9.45	0.00527706
			23	421.865		-9.43333	0.00521842
			24	427.056		-9.41667	0.00516044
			25	417.078		-9.4	0.0051031
			26	422.021		-9.38333	0.0050464
			27	402.028		-9.36667	0.00499033
			28	419.342		-9.35	0.00501851
			29	409.91		-9.33333	0.00501651
			30	401.553		-9.31667	0.00501453
			31	395.4		-9.3	0.00500231
			32	394.36		-9.28333	0.00502108
			33	398.07		-9.26667	0.00501034
			34	394.125		-9.23333	0.00495467
			35	399.521		-9.21667	0.00489962
			36	387.523		-9.2	0.00500001
			37	385.586		-9.18333	0.00494445
						-9.16667	0.00493197
						-9.15	0.00487832
						-9.13333	0.00482527
						-9.11667	0.00477441
						-9.1	0.00478058
						-9.08333	0.00472993
						-9.06667	0.00470839
						-9.05	0.00468709
						-9.03333	0.00463677
						-9.01667	0.00458525
						-9	0.0045343
						-8.98333	0.00448392
						-8.96667	0.0044341
						-8.95	0.00438483
						-8.93333	0.00433611
						-8.91667	0.00429885
						-8.9	0.00425108
						-8.88333	0.00420385
						-8.86667	0.00415714
						-8.85	0.00416292
						-8.83333	0.00411666
						-8.81667	0.00407092
						-8.8	0.00402569
						-8.78333	0.00402324
						-8.75	0.00420321
						-8.73333	0.0042436
						-8.71667	0.00428355
						-8.7	0.00427632
						-8.68333	0.00443512
						-8.66667	0.00454199
						-8.65	0.00449152
						-8.63333	0.00444161
						-8.61667	0.00439226
						-8.6	0.00443156
						-8.58333	0.0043833
						-8.56667	0.00433789
						-8.55	0.00429299
						-8.53333	0.00428929
						-8.51667	0.00431056
						-8.5	0.00429868
						-8.48333	0.00432296
						-8.46667	0.00434697
						-8.45	0.00440082
						-8.43333	0.0043592
						-8.41667	0.00436303
						-8.4	0.00436525
						-8.38333	0.00436744
						-8.36667	0.00441833
						-8.35	0.00436924
						-8.33333	0.00433994
						-8.31667	0.00429788
						-8.3	0.00425628
						-8.28333	0.00426686
						-8.26667	0.00421945
						-8.25	0.00430263
						-8.23333	0.00438489
						-8.21667	0.00437117
						-8.18333	0.00432269
						-8.16667	0.00433102
						-8.15	0.00438019
						-8.13333	0.00442881
						-8.11667	0.0043796
						-8.1	0.00443642
						-8.08333	0.00450239
						-8.06667	0.00447956
						-8.05	0.00445698
						-8.03333	0.00443707
						-8.01667	0.00442012
						-8	0.00437101
						-7.98333	0.00439717
						-7.96667	0.00442303
						-7.95	0.00444789
						-7.93333	0.00439847
						-7.91667	0.00438694
						-7.9	0.00433819
						-7.88333	0.00428999
						-7.86667	0.0042427
						-7.85	0.00419556
						-7.83333	0.00421212
						-7.81667	0.00416829
						-7.8	0.00434469
						-7.78333	0.00451914
						-7.76667	0.00459935
						-7.75	0.00459086
						-7.73333	0.00463914
						-7.71667	0.00458759
						-7.7	0.00466705
						-7.68333	0.00461519
						-7.66667	0.0046456
						-7.65	0.00467568
						-7.63333	0.00483569
						-7.6	0.00485031
						-7.58333	0.00485789
						-7.56667	0.00503516
						-7.55	0.00521046
						-7.53333	0.00515257
						-7.51667	0.00509773
						-7.5	0.00504109
						-7.48333	0.00510974
						-7.46667	0.00517764
						-7.45	0.00519875
						-7.43333	0.00529996
						-7.41667	0.00537685
						-7.4	0.00552755
						-7.38333	0.00567658
						-7.36667	0.00561351
						-7.35	0.00563885
						-7.33333	0.0056319
						-7.31667	0.00560372
						-7.3	0.00557585
						-7.28333	0.00557822
						-7.26667	0.00551624
						-7.25	0.00551323
						-7.23333	0.00554317
						-7.21667	0.00557277
						-7.2	0.00553087
						-7.18333	0.00546942
						-7.16667	0.00559778
						-7.15	0.00572471
						-7.11667	0.00575594
						-7.1	0.00580536
						-7.08333	0.00580521
						-7.06667	0.00579296
						-7.05	0.00578085
						-7.03333	0.00583252
						-7.01667	0.00576771
						-7	0.00575846
						-6.98333	0.00577399
						-6.96667	0.00578935
						-6.95	0.00572502
						-6.93333	0.00566141
						-6.91667	0.00559851
						-6.9	0.00558102
						-6.88333	0.00556373
						-6.86667	0.005513
						-6.85	0.00547011
						-6.83333	0.00540933
						-6.81667	0.00538938
						-6.8	0.00536965
						-6.78333	0.00541492
						-6.76667	0.00549293
						-6.75	0.00552254
						-6.73333	0.00546118
						-6.71667	0.0054005
						-6.7	0.0053405
						-6.68333	0.00528116
						-6.66667	0.00522248
						-6.65	0.00526452
						-6.63333	0.00525758
						-6.61667	0.00526528
						-6.6	0.00526486
						-6.56667	0.00520636
						-6.55	0.00514851
						-6.53333	0.00509131
						-6.51667	0.00503474
						-6.5	0.00503922
						-6.48333	0.00508642
						-6.46667	0.00513309
						-6.45	0.00523043
						-6.43333	0.00517659
						-6.41667	0.005263
						-6.4	0.00520452
						-6.38333	0.0051467
						-6.36667	0.00508951
						-6.35	0.00503296
						-6.33333	0.00505545
						-6.31667	0.00499928
						-6.3	0.00494373
						-6.28333	0.0049401
						-6.26667	0.00488521
						-6.25	0.00484443
						-6.23333	0.00482901
						-6.21667	0.00481376
						-6.2	0.00479761
						-6.18333	0.0047443
						-6.16667	0.00474598
						-6.15	0.00469325
						-6.13333	0.00481807
						-6.11667	0.0049415
						-6.1	0.00502906
						-6.08333	0.00497318
						-6.06667	0.00491792
						-6.05	0.00491616
						-6.03333	0.00489108
						-6.01667	0.00489184
						-6	0.00483748
						-5.96667	0.00478373
						-5.95	0.00480386
						-5.93333	0.00478893
						-5.91667	0.00476545
						-5.9	0.00474836
						-5.88333	0.00473146
						-5.86667	0.00468083
						-5.85	0.00466876
						-5.83333	0.00466405
						-5.81667	0.00464414
						-5.8	0.00462446
						-5.78333	0.0047001
						-5.76667	0.00467247
						-5.75	0.00475358
						-5.73333	0.0048545
						-5.71667	0.00495429
						-5.7	0.00489925
						-5.68333	0.00490618
						-5.66667	0.00495127
						-5.65	0.00497056
						-5.63333	0.00498964
						-5.61667	0.00508831
						-5.6	0.0050573
						-5.58333	0.00504033
						-5.56667	0.00503421
						-5.55	0.00502817
						-5.53333	0.00524426
						-5.51667	0.00524884
						-5.5	0.00528724
						-5.46667	0.00532522
						-5.45	0.00526605
						-5.43333	0.00520754
						-5.41667	0.00520218
						-5.4	0.00514438
						-5.38333	0.00508722
						-5.36667	0.0052044
						-5.35	0.00516043
						-5.33333	0.00517893
						-5.31667	0.00522996
						-5.3	0.00528042
						-5.28333	0.00522845
						-5.26667	0.00517035
						-5.25	0.00515995
						-5.23333	0.00514737
						-5.21667	0.00513492
						-5.2	0.00508471
						-5.18333	0.00511534
						-5.16667	0.00514347
						-5.15	0.00522261
						-5.13333	0.00530088
						-5.11667	0.00532959
						-5.1	0.00539846
						-5.08333	0.00533848
						-5.06667	0.00536253
						-5.05	0.00538632
						-5.03333	0.00537025
						-5.01667	0.00531058
						-5	0.00529295
						-4.98333	0.00527551
						-4.96667	0.00525827
						-4.95	0.00545352
						-4.93333	0.00543262
						-4.91667	0.00544805
						-4.9	0.00546331
						-4.86667	0.00540261
						-4.85	0.00534258
						-4.83333	0.00528321
						-4.81667	0.00542912
						-4.8	0.00557341
						-4.78333	0.00551149
						-4.76667	0.0055112
						-4.75	0.00554327
						-4.73333	0.0055343
						-4.71667	0.00552542
						-4.7	0.00546403
						-4.68333	0.00541351
						-4.66667	0.00538096
						-4.65	0.00532196
						-4.63333	0.00526362
						-4.61667	0.0052919
						-4.6	0.00527598
						-4.58333	0.00529432
						-4.56667	0.00523549
						-4.55	0.00517732
						-4.53333	0.00517575
						-4.51667	0.00550078
						-4.5	0.00549372
						-4.48333	0.00547907
						-4.46667	0.00544608
						-4.45	0.00539482
						-4.43333	0.00553109
						-4.41667	0.00546963
						-4.4	0.00540886
						-4.36667	0.0054543
						-4.35	0.00553005
						-4.33333	0.0054686
						-4.31667	0.00540784
						-4.3	0.00534775
						-4.28333	0.0053049
						-4.26667	0.00524596
						-4.25	0.00533116
						-4.23333	0.00530078
						-4.21667	0.00527074
						-4.2	0.00521353
						-4.18333	0.00521027
						-4.16667	0.00528178
						-4.15	0.00522493
						-4.13333	0.00516871
						-4.11667	0.00511128
						-4.1	0.00505449
						-4.08333	0.00499832
						-4.06667	0.00497516
						-4.05	0.00495224
						-4.03333	0.00503413
						-4.01667	0.0049782
						-4	0.00492288
						-3.98333	0.00491283
						-3.96667	0.0049029
						-3.95	0.00484842
						-3.93333	0.00486553
						-3.91667	0.00488922
						-3.9	0.00495782
						-3.88333	0.00490273
						-3.86667	0.00489345
						-3.85	0.004891
						-3.81667	0.00492795
						-3.8	0.00496449
						-3.78333	0.00494905
						-3.76667	0.0049315
						-3.75	0.0049757
						-3.73333	0.00493223
						-3.71667	0.00488925
						-3.7	0.00486645
						-3.68333	0.00481238
						-3.66667	0.00479516
						-3.65	0.00474396
						-3.63333	0.00469332
						-3.61667	0.00471008
						-3.6	0.00482455
						-3.58333	0.00478354
						-3.56667	0.00487279
						-3.55	0.00496104
						-3.53333	0.00493653
						-3.51667	0.00489266
						-3.5	0.00490113
						-3.48333	0.00484667
						-3.46667	0.00479282
						-3.45	0.00480959
						-3.43333	0.00475732
						-3.41667	0.00470727
						-3.4	0.00483795
						-3.38333	0.00490104
						-3.36667	0.00496342
						-3.35	0.00495864
						-3.33333	0.00502271
						-3.31667	0.00508607
						-3.3	0.00503581
						-3.28333	0.00553167
						-3.25	0.00547021
						-3.23333	0.00546789
						-3.21667	0.00546559
						-3.2	0.00540486
						-3.18333	0.0053468
						-3.16667	0.00536161
						-3.15	0.00536325
						-3.13333	0.00536487
						-3.11667	0.0053814
						-3.1	0.00537161
						-3.08333	0.00540463
						-3.06667	0.00541891
						-3.05	0.00543303
						-3.03333	0.00541335
						-3.01667	0.00535588
						-3	0.00529637
						-2.98333	0.00523918
						-2.96667	0.00518264
						-2.95	0.00516321
						-2.93333	0.00510672
						-2.91667	0.00512809
						-2.9	0.00508281
						-2.88333	0.00503804
						-2.86667	0.00499388
						-2.85	0.0049851
						-2.83333	0.00495209
						-2.81667	0.00493121
						-2.8	0.00491057
						-2.78333	0.00491619
						-2.76667	0.00486157
						-2.75	0.00480755
						-2.73333	0.00475413
						-2.71667	0.00470131
						-2.7	0.00464907
						-2.68333	0.00459741
						-2.65	0.00463408
						-2.63333	0.00467033
						-2.61667	0.00472548
						-2.6	0.00473157
						-2.58333	0.00468264
						-2.56667	0.00468445
						-2.55	0.00468623
						-2.53333	0.00463783
						-2.51667	0.0045863
						-2.5	0.00453534
						-2.48333	0.00448494
						-2.46667	0.00443511
						-2.45	0.00450221
						-2.43333	0.00445219
						-2.41667	0.0044052
						-2.4	0.00437085
						-2.38333	0.00433687
						-2.36667	0.00436337
						-2.35	0.00431489
						-2.33333	0.00431502
						-2.31667	0.00436322
						-2.3	0.00441089
						-2.28333	0.00436188
						-2.26667	0.00437626
						-2.25	0.00439763
						-2.21667	0.00441877
						-2.2	0.00437305
						-2.18333	0.00432446
						-2.16667	0.00435193
						-2.15	0.00430358
						-2.13333	0.00425576
						-2.11667	0.00430733
						-2.1	0.00429543
						-2.08333	0.00437426
						-2.06667	0.00432566
						-2.05	0.0042776
						-2.03333	0.00427388
						-2.01667	0.0042264
						-2	0.00424149
						-1.98333	0.00419437
						-1.96667	0.00414776
						-1.95	0.00410168
						-1.93333	0.00408717
						-1.91667	0.00404175
						-1.9	0.00404552
						-1.88333	0.00404925
						-1.86667	0.00404958
						-1.85	0.00400458
						-1.83333	0.00407578
						-1.81667	0.00403522
						-1.8	0.00399511
						-1.78333	0.00414889
						-1.76667	0.00410279
						-1.75	0.0041876
						-1.73333	0.00425465
						-1.71667	0.0044105
						-1.7	0.00456462
						-1.68333	0.0045139
						-1.66667	0.00455441
						-1.65	0.00459446
						-1.61667	0.00459732
						-1.6	0.00459795
						-1.58333	0.00454686
						-1.56667	0.00454612
						-1.55	0.00454539
						-1.53333	0.00453402
						-1.51667	0.0046663
						-1.5	0.00461533
						-1.48333	0.00462654
						-1.46667	0.00463763
						-1.45	0.00463627
						-1.43333	0.00462613
						-1.41667	0.00457473
						-1.4	0.00456504
						-1.38333	0.00455545
						-1.36667	0.0045376
						-1.35	0.00464318
						-1.33333	0.00469545
						-1.31667	0.00467754
						-1.3	0.00465982
						-1.28333	0.00460804
						-1.26667	0.00455774
						-1.25	0.0045071
						-1.23333	0.00445702
						-1.21667	0.00444342
						-1.2	0.0044269
						-1.18333	0.00441056
						-1.16667	0.00436155
						-1.15	0.00431309
						-1.11667	0.00426795
						-1.1	0.00427117
						-1.08333	0.00432137
						-1.06667	0.00429421
						-1.05	0.00426735
						-1.03333	0.00421994
						-1.01667	0.00418919
						-1	0.0042195
						-0.983333	0.00420763
						-0.966667	0.00419589
						-0.95	0.00419232
						-0.933333	0.00426588
						-0.916667	0.00426834
						-0.9	0.004221
						-0.883333	0.00417419
						-0.866667	0.00412781
						-0.85	0.00412437
						-0.833333	0.00407855
						-0.816667	0.00407826
						-0.8	0.00407797
						-0.783333	0.00406345
						-0.766667	0.0040183
						-0.75	0.00405782
						-0.733333	0.00409133
						-0.716667	0.00412446
						-0.7	0.00422879
						-0.683333	0.00435847
						-0.666667	0.00448672
						-0.65	0.00451503
						-0.633333	0.00446486
						-0.6	0.00446615
						-0.583333	0.0044484
						-0.566667	0.00445888
						-0.55	0.00446925
						-0.533333	0.00441959
						-0.516667	0.00437049
						-0.5	0.00434307
						-0.483333	0.0044531
						-0.466667	0.0045619
						-0.45	0.00462076
						-0.433333	0.00487622
						-0.416667	0.00495034
						-0.4	0.00489533
						-0.383333	0.00484094
						-0.366667	0.00478715
						-0.35	0.00487875
						-0.333333	0.00482454
						-0.316667	0.00489155
						-0.3	0.00495782
						-0.283333	0.0050498
						-0.266667	0.0051201
						-0.25	0.00506742
						-0.233333	0.0050598
						-0.216667	0.00505226
						-0.2	0.00506352
						-0.183333	0.00508325
						-0.166667	0.0051001
						-0.133333	0.00511675
						-0.116667	0.00509559
						-0.1	0.00509251
						-0.0833333	0.00512042
						-0.0666667	0.00510878
						-0.05	0.00509726
						-0.0333333	0.00509603
						-0.0166667	0.00507185
						0	0.0050155
						0.0166667	0.0050501
						0.0333333	0.00508431
						0.05	0.00502782
						0.0666667	0.00500713
						0.0833333	0.00498799
						0.1	0.00525534
						0.116667	0.00551972
						0.133333	0.00555319
						0.15	0.00567964
						0.166667	0.00561653
						0.183333	0.00558861
						0.2	0.00556101
						0.216667	0.00596359
						0.233333	0.00605536
						0.25	0.0063903
						0.266667	0.00705703
						0.283333	0.00771636
						0.3	0.00823559
						0.316667	0.00933914
						0.333333	0.00961569
						0.35	0.00988916
						0.366667	0.0101596
						0.383333	0.0110231
						0.4	0.0123343
						0.416667	0.0142076
						0.45	0.0160602
						0.466667	0.0175109
						0.483333	0.0195175
						0.5	0.0214153
						0.516667	0.023146
						0.533333	0.0248575
						0.55	0.0273753
						0.566667	0.0300462
						0.583333	0.0334721
						0.6	0.0354379
						0.616667	0.0373819
						0.633333	0.0400667
						0.65	0.0418181
						0.666667	0.0434249
						0.683333	0.0451246
						0.7	0.0468055
						0.716667	0.0482124
						0.733333	0.049948
						0.75	0.0512239
						0.766667	0.0524574
						0.783333	0.0536773
						0.8	0.0550194
						0.816667	0.056254
						0.833333	0.0575302
						0.85	0.0580828
						0.866667	0.0586292
						0.883333	0.0609533
						0.9	0.0629298
						0.916667	0.0651413
						0.933333	0.0676369
						0.95	0.0699258
						0.966667	0.0721892
						0.983333	0.0741947
						1.01667	0.0755292
						1.03333	0.0768488
						1.05	0.0791152
						1.06667	0.0816103
						1.08333	0.0842041
						1.1	0.0878349
						1.11667	0.0914253
						1.13333	0.0944967
						1.15	0.0973651
						1.16667	0.0997791
						1.18333	0.102918
						1.2	0.106022
						1.21667	0.110241
						1.23333	0.113152
						1.25	0.116321
						1.26667	0.118588
						1.28333	0.12083
						1.3	0.125357
						1.31667	0.129131
						1.33333	0.134134
						1.35	0.138066
						1.36667	0.142434
						1.38333	0.148059
						1.4	0.15362
						1.41667	0.15702
						1.43333	0.160383
						1.45	0.163436
						1.48333	0.165898
						1.5	0.169072
						1.51667	0.172222
						1.53333	0.175336
						1.55	0.177732
						1.56667	0.179029
						1.58333	0.181326
						1.6	0.18459
						1.61667	0.187818
						1.63333	0.190463
						1.65	0.19357
						1.66667	0.195895
						1.68333	0.200202
						1.7	0.204462
						1.71667	0.207453
						1.73333	0.210065
						1.75	0.212752
						1.76667	0.215265
						1.78333	0.21775
						1.8	0.219963
						1.81667	0.223653
						1.83333	0.228004
						1.85	0.231605
						1.86667	0.235167
						1.88333	0.239022
						1.9	0.243182
						1.91667	0.246633
						1.93333	0.250574
						1.95	0.255892
						1.96667	0.259085
						1.98333	0.262242
						2.01667	0.266665
						2.03333	0.271039
						2.05	0.275429
						2.06667	0.278468
						2.08333	0.284402
						2.1	0.291061
						2.11667	0.297647
						2.13333	0.302507
						2.15	0.306862
						2.16667	0.313619
						2.18333	0.318083
						2.2	0.322498
						2.21667	0.329091
						2.23333	0.333811
						2.25	0.33848
						2.26667	0.342214
						2.28333	0.345905
						2.3	0.349551
						2.31667	0.352648
						2.33333	0.356725
						2.35	0.361901
						2.36667	0.36702
						2.38333	0.370592
						2.4	0.373924
						2.41667	0.377212
						2.43333	0.380463
						2.46667	0.383146
						2.48333	0.38623
						2.5	0.38815
						2.51667	0.390855
						2.53333	0.393529
						2.55	0.396745
						2.56667	0.4007
						2.58333	0.403901
						2.6	0.408474
						2.61667	0.412995
						2.63333	0.415413
						2.65	0.418248
						2.66667	0.421739
						2.68333	0.425081
						2.7	0.428386
						2.71667	0.431785
						2.73333	0.434178
						2.75	0.438238
						2.76667	0.441232
						2.78333	0.444193
						2.8	0.446443
						2.81667	0.449967
						2.83333	0.455376
						2.85	0.45931
						2.86667	0.4632
						2.88333	0.470252
						2.9	0.47613
						2.91667	0.479221
						2.93333	0.482278
						2.95	0.487844
						2.96667	0.493349
						3	0.498558
						3.01667	0.503379
						3.03333	0.508146
						3.05	0.512376
						3.06667	0.515236
						3.08333	0.520121
						3.1	0.527227
						3.11667	0.534254
						3.13333	0.538364
						3.15	0.541815
						3.16667	0.544643
						3.18333	0.548254
						3.2	0.551825
						3.21667	0.555484
						3.23333	0.559516
						3.25	0.562673
						3.26667	0.5671
						3.28333	0.571479
						3.3	0.575883
						3.31667	0.581516
						3.33333	0.586259
						3.35	0.589071
						3.36667	0.591852
						3.38333	0.596389
						3.4	0.60256
						3.43333	0.606034
						3.45	0.60947
						3.46667	0.612404
						3.48333	0.613922
						3.5	0.617149
						3.51667	0.620258
						3.53333	0.623332
						3.55	0.625255
						3.56667	0.627588
						3.58333	0.631413
						3.6	0.633837
						3.61667	0.636235
						3.63333	0.640044
						3.65	0.641185
						3.66667	0.645482
						3.68333	0.64879
						3.7	0.652061
						3.71667	0.65815
						3.73333	0.662076
						3.75	0.667089
						3.76667	0.671316
						3.78333	0.675497
						3.8	0.679982
						3.81667	0.685958
						3.83333	0.69034
						3.85	0.694705
						3.86667	0.699021
						3.88333	0.702437
						3.9	0.70654
						3.91667	0.711887
						3.93333	0.717174
						3.95	0.722403
						3.96667	0.727911
						3.98333	0.733521
						4	0.739068
						4.01667	0.743492
						4.03333	0.749538
						4.06667	0.754549
						4.08333	0.758332
						4.1	0.762442
						4.11667	0.766506
						4.13333	0.769241
						4.15	0.77159
						4.16667	0.774415
						4.18333	0.775603
						4.2	0.776779
						4.21667	0.78052
						4.23333	0.783683
						4.25	0.785998
						4.26667	0.789494
						4.28333	0.79295
						4.3	0.796963
						4.31667	0.801704
						4.33333	0.807889
						4.35	0.811508
						4.36667	0.815087
						4.38333	0.820328
						4.4	0.825648
						4.41667	0.832511
						4.43333	0.836455
						4.45	0.840355
						4.46667	0.842625
						4.48333	0.847979
						4.5	0.853396
						4.51667	0.858163
						4.53333	0.862878
						4.55	0.863778
						4.56667	0.866014
						4.58333	0.869416
						4.6	0.87104
						4.61667	0.873382
						4.65	0.876511
						4.66667	0.877851
						4.68333	0.87869
						4.7	0.87952
						4.71667	0.882014
						4.73333	0.883365
						4.75	0.886106
						4.76667	0.888014
						4.78333	0.889901
						4.8	0.897197
						4.81667	0.902844
						4.83333	0.906295
						4.85	0.909051
						4.86667	0.911776
						4.88333	0.916577
						4.9	0.919212
						4.91667	0.921397
						4.93333	0.92401
						4.95	0.926593
						4.96667	0.929133
						4.98333	0.934697
						5	0.942308
						5.01667	0.946335
						5.03333	0.950318
						5.05	0.953081
						5.06667	0.953866
						5.08333	0.955349
						5.1	0.956191
						5.11667	0.957958
						5.13333	0.960988
						5.15	0.963316
						5.16667	0.96562
						5.18333	0.967927
						5.21667	0.970186
						5.23333	0.972561
						5.25	0.974304
						5.26667	0.976183
						5.28333	0.978042
						5.3	0.980671
						5.31667	0.984268
						5.33333	0.989524
						5.35	0.992185
						5.36667	0.994815
						5.38333	0.998529
						5.4	1.00109
						5.41667	1.00389
						5.43333	1.00738
						5.45	1.01083
						5.46667	1.01428
						5.48333	1.01761
						5.5	1.019
						5.51667	1.02159
						5.53333	1.02416
						5.55	1.03013
						5.56667	1.0355
						5.58333	1.0396
						5.6	1.04336
						5.61667	1.04707
						5.63333	1.05189
						5.65	1.05634
						5.66667	1.05945
						5.68333	1.06357
						5.71667	1.0659
						5.73333	1.07023
						5.75	1.07567
						5.76667	1.07791
						5.78333	1.08013
						5.8	1.08374
						5.81667	1.08618
						5.83333	1.08841
						5.85	1.0913
						5.86667	1.09415
						5.88333	1.09569
						5.9	1.09728
						5.91667	1.10158
						5.93333	1.10574
						5.95	1.10985
						5.96667	1.11166
						5.98333	1.11251
						6	1.11447
						6.01667	1.11471
						6.03333	1.11495
						6.05	1.11852
						6.06667	1.12172
						6.08333	1.1254
						6.1	1.12948
						6.11667	1.13352
						6.13333	1.13571
						6.15	1.13683
						6.16667	1.13674
						6.18333	1.13763
						6.2	1.13852
						6.21667	1.144
						6.23333	1.14592
						6.25	1.14781
						6.28333	1.15279
						6.3	1.15386
						6.31667	1.15639
						6.33333	1.15587
						6.35	1.15758
						6.36667	1.15928
						6.38333	1.163
						6.4	1.16712
						6.41667	1.17072
						6.43333	1.17429
						6.45	1.17783
						6.46667	1.18334
						6.48333	1.18603
						6.5	1.18785
						6.51667	1.18984
						6.53333	1.19182
						6.55	1.19334
						6.56667	1.19469
						6.58333	1.19658
						6.6	1.19846
						6.61667	1.20032
						6.63333	1.20763
						6.65	1.21147
						6.66667	1.21658
						6.68333	1.22035
						6.7	1.22186
						6.71667	1.22377
						6.73333	1.22509
						6.76667	1.22754
						6.78333	1.22996
						6.8	1.23142
						6.81667	1.23471
						6.83333	1.23953
						6.85	1.24081
						6.86667	1.24207
						6.88333	1.24622
						6.9	1.2481
						6.91667	1.25044
						6.93333	1.25555
						6.95	1.2606
						6.96667	1.26229
						6.98333	1.26479
						7	1.26771
						7.01667	1.26997
						7.03333	1.2722
						7.05	1.27272
						7.06667	1.27258
						7.08333	1.27778
						7.1	1.27992
						7.11667	1.28203
						7.13333	1.28251
						7.15	1.28414
						7.16667	1.28854
						7.18333	1.29574
						7.2	1.30286
						7.21667	1.30438
						7.23333	1.30512
						7.25	1.30717
						7.26667	1.30919
						7.28333	1.31119
						7.3	1.31483
						7.31667	1.31924
						7.35	1.32426
						7.36667	1.32922
						7.38333	1.33409
						7.4	1.33744
						7.41667	1.34057
						7.43333	1.34529
						7.45	1.34996
						7.46667	1.35252
						7.48333	1.35288
						7.5	1.3529
						7.51667	1.35267
						7.53333	1.35245
						7.55	1.35629
						7.56667	1.3599
						7.58333	1.36396
						7.6	1.36435
						7.61667	1.36473
						7.63333	1.36681
						7.65	1.36743
						7.66667	1.37069
						7.68333	1.37035
						7.7	1.37002
						7.71667	1.37106
						7.73333	1.37158
						7.75	1.373
						7.76667	1.37647
						7.78333	1.37722
						7.8	1.37797
						7.81667	1.38015
						7.83333	1.38421
						7.85	1.38663
						7.86667	1.38958
						7.9	1.39336
						7.91667	1.39575
						7.93333	1.39772
						7.95	1.39968
						7.96667	1.40029
						7.98333	1.40017
						8	1.40145
						8.01667	1.40127
						8.03333	1.4011
						8.05	1.40086
						8.06667	1.40145
						8.08333	1.40338
						8.1	1.40194
						8.11667	1.40051
						8.13333	1.40307
						8.15	1.40394
						8.16667	1.40845
						8.18333	1.4106
						8.2	1.41274
						8.21667	1.41169
						8.23333	1.41159
						8.25	1.41144
						8.26667	1.41164
						8.28333	1.41185
						8.3	1.4122
						8.31667	1.41404
						8.33333	1.41514
						8.35	1.41774
						8.36667	1.42162
						8.38333	1.42545
						8.4	1.42785
						8.41667	1.43056
						8.43333	1.43178
						8.45	1.43273
						8.46667	1.43476
						8.5	1.43501
						8.51667	1.43655
						8.53333	1.43808
						8.55	1.43885
						8.56667	1.43801
						8.58333	1.43934
						8.6	1.43945
						8.61667	1.43955
						8.63333	1.44007
						8.65	1.43879
						8.66667	1.43782
						8.68333	1.43941
						8.7	1.44098
						8.78333	1.44218
						8.8	1.44305
						8.81667	1.446
						8.83333	1.44892
						8.85	1.44933
						8.86667	1.45199
						8.88333	1.45389
						8.9	1.45291
						8.91667	1.45428
						8.93333	1.45564
						8.95	1.45556
						8.96667	1.45601
						8.98333	1.45499
						9	1.45564
						9.01667	1.45629
						9.03333	1.45629
						9.05	1.45959
						9.06667	1.46339
						9.1	1.46372
						9.11667	1.46404
						9.13333	1.46715
						9.15	1.46917
						9.16667	1.4706
						9.18333	1.46916
						9.2	1.46773
						9.21667	1.46753
						9.23333	1.46822
						9.25	1.46861
						9.26667	1.47015
						9.28333	1.47168
						9.3	1.47217
						9.31667	1.47249
						9.33333	1.47189
						9.35	1.47129
						9.36667	1.4701
						9.38333	1.47211
						9.4	1.47122
						9.41667	1.47076
						9.43333	1.4703
						9.45	1.46988
						9.46667	1.46884
						9.48333	1.46805
						9.5	1.46883
						9.51667	1.4696
						9.53333	1.46871
						9.55	1.46915
						9.56667	1.46988
						9.58333	1.46822
						9.6	1.46658
						9.61667	1.46651
						9.65	1.46611
						9.66667	1.46783
						9.68333	1.46839
						9.7	1.46894
						9.71667	1.46883
						9.73333	1.46781
						9.75	1.46636
						9.76667	1.46782
						9.78333	1.46927
						9.8	1.46773
						9.81667	1.46606
						9.83333	1.4667
						9.85	1.46623
						9.86667	1.46577
						9.88333	1.46392
						9.9	1.46209
						9.91667	1.46384
						9.93333	1.4636
						9.95	1.46332
						9.96667	1.4617
						9.98333	1.46239
						10	1.46381
						10.0167	1.46521
						10.0333	1.46371
						10.05	1.46471
						10.0667	1.4654
						10.0833	1.46265
						10.1	1.45993
						10.1167	1.45754
						10.1333	1.45761
						10.15	1.45797
						10.1667	1.45874
						10.1833	1.45951
						10.2167	1.45759
						10.2333	1.45492
						10.25	1.45421
						10.2667	1.45232
						10.2833	1.45044
						10.3	1.45093
						10.3167	1.45253
						10.3333	1.45421
						10.35	1.45495
						10.3667	1.45519
						10.3833	1.45543
						10.4	1.45492
						10.4167	1.45668
						10.4333	1.45842
						10.45	1.45867
						10.4667	1.45893
						10.4833	1.45859
						10.5	1.4587
						10.5167	1.4588
						10.5333	1.46175
						10.55	1.46153
						10.5667	1.45994
						10.5833	1.45785
						10.6	1.45578
						10.6167	1.45387
						10.6333	1.45196
						10.65	1.44803
						10.6667	1.4465
						10.7	1.44499
						10.7167	1.44332
						10.7333	1.44007
						10.75	1.44041
						10.7667	1.43993
						10.7833	1.43945
						10.8	1.43956
						10.8167	1.4365
						10.8333	1.43472
						10.85	1.43436
						10.8667	1.43401
						10.8833	1.43241
						10.9	1.43152
						10.9167	1.43061
						10.9333	1.42863
						10.95	1.42667
						10.9667	1.4236
						10.9833	1.421
						11	1.42037
						11.0167	1.41907
						11.0333	1.41755
						11.05	1.4194
						11.0667	1.41852
						11.0833	1.41579
						11.1	1.41309
						11.1167	1.41115
						11.1333	1.4093
						11.15	1.40726
						11.1667	1.40561
						11.1833	1.40398
						11.2	1.40137
						11.2167	1.39746
						11.2333	1.39713
						11.25	1.39668
						11.2667	1.39624
						11.2833	1.3935
						11.3167	1.3922
						11.3333	1.388
						11.35	1.387
						11.3667	1.386
						11.3833	1.38341
						11.4	1.38379
						11.4167	1.3818
						11.4333	1.37977
						11.45	1.37777
						11.4667	1.37599
						11.4833	1.37351
						11.5	1.37106
						11.5167	1.36985
						11.5333	1.36865
						11.55	1.36599
						11.5667	1.36214
						11.5833	1.35777
						11.6	1.35345
						11.6167	1.35057
						11.6333	1.34631
						11.65	1.34542
						11.6667	1.34381
						11.6833	1.34221
						11.7	1.33848
						11.7167	1.33702
						11.7333	1.33389
						11.75	1.33241
						11.7667	1.33095
						11.7833	1.32802
						11.8167	1.32528
						11.8333	1.32482
						11.85	1.3246
						11.8667	1.32438
						11.8833	1.32266
						11.9	1.32354
						11.9167	1.32388
						11.9333	1.32319
						11.95	1.32252
						11.9667	1.32129
						11.9833	1.32116
						12	1.32034
						12.0167	1.31753
						12.0333	1.31476
						12.05	1.31307
						12.0667	1.30877
						12.0833	1.30489
						12.1	1.30105
						12.1167	1.29726
						12.1333	1.29586
						12.15	1.29402
						12.1667	1.29123
						12.1833	1.28847
						12.2	1.2854
						12.2167	1.28263
						12.2333	1.28168
						12.25	1.27978
						12.2667	1.2779
						12.2833	1.27914
						12.3	1.2772
						12.3167	1.27445
						12.3333	1.27192
						12.35	1.26941
						12.3667	1.26699
						12.3833	1.26649
						12.4	1.26438
						12.4333	1.26306
						12.45	1.26176
						12.4667	1.25908
						12.4833	1.25667
						12.5	1.25538
						12.5167	1.2526
						12.5333	1.24986
						12.55	1.24994
						12.5667	1.24753
						12.5833	1.24401
						12.6	1.24339
						12.6167	1.24278
						12.6333	1.23932
						12.65	1.23696
						12.6667	1.23376
						12.6833	1.2306
						12.7	1.22747
						12.7167	1.22414
						12.7333	1.22134
						12.75	1.21782
						12.7667	1.21434
						12.7833	1.21109
						12.8	1.20897
						12.8167	1.20516
						12.8333	1.20198
						12.85	1.19884
						12.8667	1.19849
						12.8833	1.19643
						12.9	1.19475
						12.9167	1.19159
						12.9333	1.18846
						12.95	1.18733
						12.9833	1.18481
						13	1.18083
						13.0167	1.17752
						13.0333	1.17424
						13.05	1.1709
						13.0667	1.16716
						13.0833	1.16586
						13.1	1.16444
						13.1167	1.16304
						13.1333	1.15827
						13.15	1.15286
						13.1667	1.14799
						13.1833	1.14378
						13.2	1.13962
						13.2167	1.13695
						13.2333	1.13399
						13.25	1.1327
						13.2667	1.13019
						13.2833	1.12693
						13.3	1.12296
						13.3167	1.12019
						13.3333	1.11658
						13.35	1.11302
						13.3667	1.10963
						13.3833	1.10649
						13.4	1.10343
						13.4167	1.1007
						13.4333	1.09799
						13.45	1.09583
						13.4667	1.09181
						13.4833	1.08816
						13.5	1.08465
						13.5167	1.08118
						13.5333	1.07733
						13.5667	1.07271
						13.5833	1.06833
						13.6	1.06384
						13.6167	1.0594
						13.6333	1.05673
						13.65	1.05485
						13.6667	1.05362
						13.6833	1.04998
						13.7	1.04639
						13.7167	1.04382
						13.7333	1.04036
						13.75	1.03814
						13.7667	1.03633
						13.7833	1.03453
						13.8	1.03017
						13.8167	1.02643
						13.8333	1.02378
						13.85	1.02116
						13.8667	1.01941
						13.8833	1.01931
						13.9	1.01808
						13.9167	1.01515
						13.9333	1.01225
						13.95	1.00981
						13.9667	1.00821
						13.9833	1.00608
						14	1.00451
						14.0167	1.00295
						14.05	1.0017
						14.0667	0.999041
						14.0833	0.995786
						14.1	0.994108
						14.1167	0.992447
						14.1333	0.991508
						14.15	0.989006
						14.1667	0.986427
						14.1833	0.984787
						14.2	0.983165
						14.2167	0.981459
						14.2333	0.978479
						14.25	0.976705
						14.2667	0.974416
						14.2833	0.972153
						14.3	0.969183
						14.3167	0.965841
						14.3333	0.962957
						14.35	0.960106
						14.3667	0.956446
						14.3833	0.953155
						14.4	0.949628
						14.4167	0.947464
						14.4333	0.945323
						14.45	0.942465
						14.4667	0.939355
						14.4833	0.93574
						14.5	0.932929
						14.5167	0.930149
						14.5333	0.926737
						14.55	0.924648
						14.5667	0.921567
						14.5833	0.917768
						14.6	0.914011
						14.6333	0.911414
						14.65	0.909803
						14.6667	0.907418
						14.6833	0.903768
						14.7	0.900157
						14.7167	0.898534
						14.7333	0.896301
						14.75	0.894358
						14.7667	0.890995
						14.7833	0.887669
						14.8	0.885256
						14.8167	0.884615
						14.8333	0.882849
						14.85	0.879075
						14.8667	0.875343
						14.8833	0.872802
						14.9	0.870289
						14.9167	0.868363
						14.9333	0.867563
						14.95	0.864011
						14.9667	0.861199
						14.9833	0.857832
						15	0.8568
						15.0167	0.855779
						15.0333	0.853426
						15.05	0.851445
						15.0667	0.848915
						15.0833	0.846368
						15.1	0.843849
						15.1167	0.841237
						15.1333	0.839232
						15.15	0.836348
						15.1667	0.835004
						15.2	0.833675
						15.2167	0.831202
						15.2333	0.829044
						15.25	0.826049
						15.2667	0.82315
						15.2833	0.820283
						15.3	0.818891
						15.3167	0.816852
						15.3333	0.813877
						15.35	0.812271
						15.3667	0.810684
						15.3833	0.809418
						15.4	0.805802
						15.4167	0.804456
						15.4333	0.803124
						15.45	0.801808
						15.4667	0.7999
						15.4833	0.797028
						15.5	0.797007
						15.5167	0.796985
						15.5333	0.795418
						15.55	0.793339
						15.5667	0.792137
						15.5833	0.790276
						15.6	0.788437
						15.6167	0.787812
						15.6333	0.7875
						15.65	0.785788
						15.6667	0.782857
						15.6833	0.779959
						15.7	0.777818
						15.7333	0.775556
						15.75	0.772896
						15.7667	0.77155
						15.7833	0.77022
						15.8	0.769327
						15.8167	0.76642
						15.8333	0.763253
						15.85	0.761906
						15.8667	0.760574
						15.8833	0.757657
						15.9	0.755116
						15.9167	0.752359
						15.9333	0.751572
						15.95	0.750794
						15.9667	0.749964
						15.9833	0.748001
						16	0.74701
						16.0167	0.743593
						16.0333	0.740214
						16.05	0.738118
						16.0667	0.736046
						16.0833	0.734726
						16.1	0.731808
						16.1167	0.73041
						16.1333	0.728541
						16.15	0.726835
						16.1667	0.725488
						16.1833	0.724155
						16.2	0.722695
						16.2167	0.721785
						16.2333	0.720393
						16.25	0.718621
						16.2667	0.716869
						16.2833	0.715392
						16.3	0.713962
						16.3167	0.713474
						16.35	0.712661
						16.3667	0.711856
						16.3833	0.711458
						16.4	0.710832
						16.4167	0.710035
						16.4333	0.707567
						16.45	0.705126
						16.4667	0.704031
						16.4833	0.701728
						16.5	0.699264
						16.5167	0.698117
						16.5333	0.696982
						16.55	0.694517
						16.5667	0.692767
						16.5833	0.690356
						16.6	0.690203
						16.6167	0.690053
						16.6333	0.687373
						16.65	0.685679
						16.6667	0.683283
						16.6833	0.680914
						16.7	0.67874
						16.7167	0.678344
						16.7333	0.676811
						16.75	0.675287
						16.7667	0.67378
						16.7833	0.673133
						16.8	0.672163
						16.8167	0.670406
						16.8333	0.668145
						16.85	0.665909
						16.8667	0.663534
						16.8833	0.660205
						16.9167	0.657162
						16.9333	0.653975
						16.95	0.650825
						16.9667	0.650396
						16.9833	0.647869
						17	0.645638
						17.0167	0.643864
						17.0333	0.642109
						17.05	0.639436
						17.0667	0.638257
						17.0833	0.637915
						17.1	0.636682
						17.1167	0.635463
						17.1333	0.633534
						17.15	0.631408
						17.1667	0.631498
						17.1833	0.629847
						17.2	0.628216
						17.2167	0.628023
						17.2333	0.627885
						17.25	0.629088
						17.2667	0.630278
						17.2833	0.629087
						17.3	0.626978
						17.3167	0.626164
						17.3333	0.624562
						17.35	0.622979
						17.3667	0.621711
						17.3833	0.620756
						17.4	0.620048
						17.4167	0.61901
						17.4333	0.617984
						17.45	0.615748
						17.4667	0.614855
						17.4833	0.613847
						17.5	0.612365
						17.5333	0.610898
						17.55	0.608342
						17.5667	0.606853
						17.5833	0.6051
						17.6	0.603304
						17.6167	0.601528
						17.6333	0.60031
						17.65	0.598354
						17.6667	0.598287
						17.6833	0.596776
						17.7	0.595281
						17.7167	0.594408
						17.7333	0.59361
						17.75	0.592318
						17.7667	0.59104
						17.7833	0.588774
						17.8	0.586534
						17.8167	0.584766
						17.8333	0.58283
						17.85	0.580915
						17.8667	0.578247
						17.8833	0.576817
						17.9	0.575901
						17.9167	0.573857
						17.9333	0.571835
						17.95	0.57001
						17.9667	0.569961
						17.9833	0.569476
						18	0.569189
						18.0333	0.568906
						18.05	0.567558
						18.0667	0.565872
						18.0833	0.564732
						18.1	0.562845
						18.1167	0.560978
						18.1333	0.56077
						18.15	0.559811
						18.1667	0.558422
						18.1833	0.557539
						18.2	0.556667
						18.2167	0.556105
						18.2333	0.554043
						18.25	0.55302
						18.2667	0.552343
						18.2833	0.551974
						18.3	0.551609
						18.3167	0.550573
						18.3333	0.551138
						18.35	0.551697
						18.3667	0.550583
						18.3833	0.550651
						18.4	0.549571
						18.4167	0.548645
						18.4333	0.54773
						18.45	0.546009
						18.4667	0.545906
						18.4833	0.545114
						18.5	0.544595
						18.5167	0.544082
						18.5333	0.543171
						18.55	0.54376
						18.5667	0.543528
						18.5833	0.542982
						18.6167	0.542442
						18.6333	0.541611
						18.65	0.539675
						18.6667	0.539004
						18.6833	0.538071
						18.7	0.537148
						18.7167	0.536587
						18.7333	0.535577
						18.75	0.534609
						18.7667	0.534158
						18.7833	0.533713
						18.8	0.532431
						18.8167	0.531218
						18.8333	0.530439
						18.85	0.530325
						18.8667	0.530213
						18.8833	0.528931
						18.9	0.527045
						18.9167	0.526436
						18.9333	0.525155
						18.95	0.524005
						18.9667	0.52253
						18.9833	0.52107
						19	0.521904
						19.0167	0.521155
						19.0333	0.520091
						19.05	0.519079
						19.0667	0.517392
						19.0833	0.515763
						19.1	0.514152
						19.1167	0.513543
						19.1333	0.513995
						19.15	0.512335
						19.1667	0.511998
						19.1833	0.511665
						19.2167	0.509738
						19.2333	0.507951
						19.25	0.506908
						19.2667	0.505586
						19.2833	0.50428
						19.3	0.50315
						19.3167	0.502663
						19.3333	0.502609
						19.35	0.501828
						19.3667	0.501055
						19.3833	0.500239
						19.4	0.498648
						19.4167	0.497408
						19.4333	0.496765
						19.45	0.49613
						19.4667	0.495661
						19.4833	0.495353
						19.5	0.495046
						19.5167	0.495545
						19.5333	0.495376
						19.55	0.49371
						19.5667	0.493929
						19.5833	0.493781
						19.6	0.493634
						19.6167	0.491601
						19.6333	0.491346
						19.65	0.491357
						19.6667	0.491006
						19.6833	0.49066
						19.7	0.489999
						19.7167	0.488597
						19.7333	0.487901
						19.75	0.487726
						19.7667	0.487552
						19.7833	0.488202
						19.8	0.488994
						19.8333	0.488924
						19.85	0.489477
						19.8667	0.490023
						19.8833	0.49033
						19.9	0.491738
						19.9167	0.491883
						19.9333	0.49001
						19.95	0.488158
						19.9667	0.487835
						19.9833	0.487531
						20	0.486199
						20.0167	0.485492
						20.0333	0.484793
						20.05	0.483005
						20.0667	0.482718
						20.0833	0.482064
						20.1	0.481409
						20.1167	0.480141
						20.1333	0.481054
						20.15	0.480415
						20.1667	0.479981
						20.1833	0.479551
						20.2	0.479188
						20.2167	0.478049
						20.2333	0.477223
						20.25	0.476568
						20.2667	0.47592
						20.2833	0.475739
						20.3	0.476891
						20.3167	0.476774
						20.3333	0.475652
						20.3667	0.474543
						20.3833	0.472665
						20.4	0.470931
						20.4167	0.470006
						20.4333	0.468406
						20.45	0.466824
						20.4667	0.466777
						20.4833	0.465743
						20.5	0.465135
						20.5167	0.46427
						20.5333	0.463414
						20.55	0.46245
						20.5667	0.46193
						20.5833	0.460911
						20.6	0.459042
						20.6167	0.458157
						20.6333	0.457559
						20.65	0.456968
						20.6667	0.456475
						20.6833	0.455987
						20.7	0.454894
						20.7167	0.454733
						20.7333	0.453045
						20.75	0.452634
						20.7667	0.452228
						20.7833	0.451589
						20.8	0.452092
						20.8167	0.452699
						20.8333	0.453949
						20.85	0.455185
						20.8833	0.455087
						20.9	0.454422
						20.9167	0.454069
						20.9333	0.45332
						20.95	0.452579
						20.9667	0.451963
						20.9833	0.450697
						21	0.451192
						21.0167	0.451886
						21.0333	0.452573
						21.05	0.452982
						21.0667	0.45342
						21.0833	0.45242
						21.1	0.453446
						21.1167	0.45446
						21.1333	0.455329
						21.15	0.455443
						21.1667	0.455021
						21.1833	0.453939
						21.2	0.454293
						21.2167	0.454879
						21.2333	0.453645
						21.25	0.453022
						21.2667	0.452405
						21.2833	0.451083
						21.3	0.450233
						21.3167	0.449407
						21.3333	0.449028
						21.35	0.448654
						21.3667	0.448947
						21.3833	0.447815
						21.4	0.446754
						21.4167	0.445311
						21.4333	0.443884
						21.45	0.443484
						21.4667	0.441852
						21.5	0.441521
						21.5167	0.440697
						21.5333	0.439882
						21.55	0.439158
						21.5667	0.438349
						21.5833	0.438023
						21.6	0.438328
						21.6167	0.438629
						21.6333	0.437704
						21.65	0.437987
						21.6667	0.438373
						21.6833	0.438259
						21.7	0.438146
						21.7167	0.436683
						21.7333	0.436358
						21.75	0.435773
						21.7667	0.434279
						21.7833	0.43374
						21.8	0.431659
						21.8167	0.429934
						21.8333	0.428231
						21.85	0.426546
						21.8667	0.425371
						21.8833	0.4246
						21.9	0.423618
						21.9167	0.422701
						21.9333	0.421794
						21.95	0.421861
						21.9667	0.42172
						21.9833	0.419993
						22	0.419614
						22.0333	0.419238
						22.05	0.418517
						22.0667	0.417832
						22.0833	0.416438
						22.1	0.415547
						22.1167	0.414667
						22.1333	0.414345
						22.15	0.413393
						22.1667	0.413406
						22.1833	0.412775
						22.2	0.412151
						22.2167	0.412139
						22.2333	0.412507
						22.25	0.413359
						22.2667	0.4135
						22.2833	0.413639
						22.3	0.41305
						22.3167	0.412516
						22.3333	0.41262
						22.35	0.411348
						22.3667	0.41009
						22.3833	0.409764
						22.4	0.410304
						22.4167	0.409447
						22.4333	0.4086
						22.45	0.408479
						22.4667	0.40923
						22.4833	0.409006
						22.5	0.408553
						22.5167	0.408105
						22.5333	0.409223
						22.55	0.408414
						22.5667	0.406922
						22.5833	0.408496
						22.6	0.410054
						22.6167	0.40966
						22.6333	0.409184
						22.6667	0.408077
						22.6833	0.407232
						22.7	0.406395
						22.7167	0.405744
						22.7333	0.404934
						22.75	0.404527
						22.7667	0.403386
						22.7833	0.402258
						22.8	0.402647
						22.8167	0.401656
						22.8333	0.400348
						22.85	0.399066
						22.8667	0.397926
						22.8833	0.3968
						22.9	0.395688
						22.9167	0.394693
						22.9333	0.394296
						22.95	0.393824
						22.9667	0.393358
						22.9833	0.392242
						23	0.391794
						23.0167	0.391351
						23.0333	0.39024
						23.05	0.389689
						23.0667	0.389331
						23.0833	0.389561
						23.1	0.389788
						23.1167	0.390155
						23.15	0.389293
						23.1667	0.389281
						23.1833	0.38851
						23.2	0.387748
						23.2167	0.387842
						23.2333	0.388972
						23.25	0.388694
						23.2667	0.389621
						23.2833	0.390538
						23.3	0.390539
						23.3167	0.389747
						23.3333	0.3895
						23.35	0.38955
						23.3667	0.389598
						23.3833	0.388507
						23.4	0.388021
						23.4167	0.387495
						23.4333	0.387024
						23.45	0.386491
						23.4667	0.385622
						23.4833	0.384611
						23.5	0.384997
						23.5167	0.385379
						23.5333	0.384448
						23.55	0.384527
						23.5667	0.384025
						23.5833	0.383944
						23.6	0.383863
						23.6167	0.38409
						23.6333	0.383925
						23.65	0.384276
						23.6667	0.384103
						23.6833	0.383932
						23.7	0.383008
						23.7167	0.382543
						23.75	0.382246
						23.7667	0.381824
						23.7833	0.381407
						23.8	0.381429
						23.8167	0.381529
						23.8333	0.381306
						23.85	0.381789
						23.8667	0.382265
						23.8833	0.383248
						23.9	0.383044
						23.9167	0.383236
						23.9333	0.382944
						23.95	0.382657
						23.9667	0.382798
						23.9833	0.382937
						24	0.382355
						24.0167	0.381056
						24.0333	0.380443
						24.05	0.381368
						24.0667	0.381196
						24.0833	0.380836
						24.1	0.38048
						24.1167	0.379622
						24.1333	0.379578
						24.15	0.379488
						24.1667	0.37953
						24.1833	0.379572
						24.2	0.37974
						24.2167	0.381307
						24.2333	0.38247
						24.2667	0.383811
						24.2833	0.385136
						24.3	0.385006
						24.3167	0.385956
						24.3333	0.386522
						24.35	0.387193
						24.3667	0.387857
						24.3833	0.387958
						24.4	0.387986
						24.4167	0.388297
[truncated: 732 more rows]

## Sheet: b
d N/d logd_p (cm^-3)
	d_p (nm)	1.9934	2.01805	2.04313	2.06863	2.09454	2.12085	2.14756	2.17465	2.20213	2.22997	2.25817	2.28672	2.31562	2.34484	2.3744	2.40427	2.43445	2.46493	2.4957	2.5268	2.55835	2.59033	2.62277	2.65567	2.68903	2.72287	2.7572	2.79202	2.82734	2.86317	2.89952	2.93639	2.9738	3.01175	3.05016	3.08903	3.12835	3.16813	3.20837	3.24907	3.29025	3.33189	3.37401	3.41661	3.45969	3.50326	3.54732	3.59187
Time (min)
-13		0.4	0.4	0.4	0.4	0.4	0.4	0.4	0.4	0.4	0.4	0.4	0.4	0.4	0.4	0.4	0.4	0.4	0.4	0.4	0.4	0.4	0.4	0.4	0.4	0.4	0.4	0.4	0.4	0.4	0.4	0.4	0.4	0.4	0.4	0.4	0.4	0.4	0.4	0.4	0.4	0.4	0.4	0.4	0.4	0.4	0.4	0.4	0.4
-7		0.4	0.4	0.4	0.4	0.4	0.4	0.4	0.4	0.4	0.4	0.4	0.4	0.4	0.4	0.4	0.4	0.4	0.4	0.4	0.4	0.4	0.4	0.4	0.4	0.4	0.4	0.4	0.4	0.4	0.4	0.4	0.4	0.4	0.4	0.4	0.4	0.4	0.4	0.4	0.4	0.4	0.4	0.4	0.4	0.4	0.4	0.4	0.4
-2		0.4	0.4	0.4	0.4	0.4	0.4	0.4	0.4	0.4	0.4	0.4	0.4	0.4	0.4	0.4	0.4	0.4	0.4	0.4	0.4	0.4	0.4	0.4	0.4	0.4	0.4	0.4	0.4	0.4	0.4	0.4	0.4	0.4	0.4	0.4	0.4	0.4	0.4	0.4	0.4	0.4	0.4	0.4	0.4	0.4	0.4	0.4	0.4
3		0.4	0.4	0.4	0.4	0.4	0.4	0.4	0.4	0.4	0.4	0.4	0.4	0.4	0.4	0.4	0.4	0.4	0.4	0.4	0.4	0.4	0.4	0.4	0.4	0.4	0.4	0.4	0.4	0.4	0.4	0.4	0.4	0.4	0.4	0.4	0.4	0.4	0.4	0.4	0.4	0.4	0.4	0.4	0.4	0.4	0.4	0.4	0.4
9		122634	128624	134419	139949	145172	150060	154590	158732	162433	165609	168157	169993	171076	171388	170919	169681	167677	164940	161501	157392	152658	147361	141575	135377	128848	122071	115131	108109	101083	94124.3	87294	80644	74215.1	68036.9	62127.9	56497.6	51149.9	46087.9	41313.9	36827.8	32626	28703.8	25057.2	21682.5	18577	15737.9	13162.5	10847.7
14		236986	269907	303522	337516	371628	405670	439540	473225	506796	540369	574063	607958	642073	676387	710865	745482	780168	814777	849104	882915	915953	947928	978529	1.00743e+06	1.03428e+06	1.05871e+06	1.08034e+06	1.09882e+06	1.11378e+06	1.1249e+06	1.13186e+06	1.13439e+06	1.13227e+06	1125316	1.11342e+06	1096541	1.07471e+06	1.04807e+06	1.01685e+06	981350	941944	899058	853179	804835	754590	703030	650751	598348
19		27837.4	31427.3	35065.7	38765	42562.6	46523.8	50743.9	56248.4	62828.1	70553.6	79644.6	90309	102725	117029	133304	151592	171900	194208	218458	244560	272396	301830	332702	364835	398039	432111	466827	501933	537149	572168	606662	640287	672683	703471	732266	758684	782351	802909	820026	833406	842799	848009	848895	845378	837447	825163	808659	788138
24		1093.96	998.648	883.442	744.31	575.911	376.825	150.606	0	0	0	0	0	0	788.804	2145.91	4006.44	6536.21	10383.5	15231.8	21079.9	27994.5	36371	46594.7	58339.5	71645.2	86527.6	102977	120958	140406	161234	183329	206555	230747	255712	281223	307021	332823	358335	383246	407243	430019	451270	470697	488005	502919	515200	524647	531102
30		1.01	1.01	1.01	9.71	7.43	6.16	2.54	2.53	2.47	1.96	0	0	0	0	0	0	0	0	108.356	434.79	860.914	1399.69	2066.2	2897.17	4293.58	6300.04	9166.62	12679.5	16894.6	22028.4	28356.3	35687.8	44050.1	53448.8	63866.5	75261.6	87566.5	100687	114504	128877	143652	158660	173725	188663	203281	217383	230766	243237
35		1.27	1.27	1.27	1.27	1.27	1.27	1.27	1.25	1	7.79	7.37	5.17	4.63	2.5	2.23	0	0	0	0	0	0	0	0	0	0	0	0	0	0	201.995	891.509	1959.57	3643.05	5879.27	8943.4	12676.5	17104.4	22236.3	28061.9	34552	41658.6	49314.7	57435	65917.9	74648.6	83503.8	92354.9	101073
40		6.99e-06	6.99e-06	6.99e-06	6.99e-06	6.99e-06	6.99e-06	6.99e-06	6.99e-06	6.99e-06	6.99e-06	6.99e-06	6.99e-06	6.99e-06	6.99e-06	6.99e-06	6.99e-06	6.99e-06	6.98e-06	6.84e-06	5.81e-06	1.09	0	0	0	0	0	0	0	0	0	0	0	0	123.255	324.132	584.578	1118.8	2058.95	3488.76	5434.75	7804.6	10606.5	13842.3	17501	21558.8	25977.8	30706.8	35682.2
[truncated: 229 more columns]

## Sheet: c
d V/d logd_p (µcc m^-3)
	d_p (nm)	1.9934	2.01805	2.04313	2.06863	2.09454	2.12085	2.14756	2.17465	2.20213	2.22997	2.25817	2.28672	2.31562	2.34484	2.3744	2.40427	2.43445	2.46493	2.4957	2.5268	2.55835	2.59033	2.62277	2.65567	2.68903	2.72287	2.7572	2.79202	2.82734	2.86317	2.89952	2.93639	2.9738	3.01175	3.05016	3.08903	3.12835	3.16813	3.20837	3.24907	3.29025	3.33189	3.37401	3.41661	3.45969	3.50326	3.54732	3.59187
Time (min)
-13		1.65814e-09	1.72043e-09	1.78536e-09	1.85304e-09	1.92355e-09	1.99696e-09	2.07336e-09	2.15283e-09	2.23545e-09	2.32131e-09	2.4105e-09	2.5031e-09	2.59919e-09	2.69886e-09	2.8022e-09	2.9093e-09	3.02023e-09	3.1351e-09	3.25397e-09	3.37717e-09	3.50523e-09	3.63835e-09	3.77675e-09	3.92065e-09	4.07029e-09	4.22591e-09	4.38776e-09	4.55611e-09	4.73122e-09	4.91338e-09	5.10289e-09	5.30006e-09	5.50521e-09	5.71864e-09	5.94028e-09	6.17027e-09	6.40891e-09	6.65651e-09	6.91339e-09	7.17988e-09	7.45631e-09	7.74304e-09	8.04041e-09	8.34882e-09	8.66864e-09	9.00027e-09	9.34411e-09	9.7006e-09
-7		1.65814e-09	1.72043e-09	1.78536e-09	1.85304e-09	1.92355e-09	1.99696e-09	2.07336e-09	2.15283e-09	2.23545e-09	2.32131e-09	2.4105e-09	2.5031e-09	2.59919e-09	2.69886e-09	2.8022e-09	2.9093e-09	3.02023e-09	3.1351e-09	3.25397e-09	3.37717e-09	3.50523e-09	3.63835e-09	3.77675e-09	3.92065e-09	4.07029e-09	4.22591e-09	4.38776e-09	4.55611e-09	4.73122e-09	4.91338e-09	5.10289e-09	5.30006e-09	5.50521e-09	5.71864e-09	5.94028e-09	6.17027e-09	6.40891e-09	6.65651e-09	6.91339e-09	7.17988e-09	7.45631e-09	7.74304e-09	8.04041e-09	8.34882e-09	8.66864e-09	9.00027e-09	9.34411e-09	9.7006e-09
-2		1.65814e-09	1.72043e-09	1.78536e-09	1.85304e-09	1.92355e-09	1.99696e-09	2.07336e-09	2.15283e-09	2.23545e-09	2.32131e-09	2.4105e-09	2.5031e-09	2.59919e-09	2.69886e-09	2.8022e-09	2.9093e-09	3.02023e-09	3.1351e-09	3.25397e-09	3.37717e-09	3.50523e-09	3.63835e-09	3.77675e-09	3.92065e-09	4.07029e-09	4.22591e-09	4.38776e-09	4.55611e-09	4.73122e-09	4.91338e-09	5.10289e-09	5.30006e-09	5.50521e-09	5.71864e-09	5.94028e-09	6.17027e-09	6.40891e-09	6.65651e-09	6.91339e-09	7.17988e-09	7.45631e-09	7.74304e-09	8.04041e-09	8.34882e-09	8.66864e-09	9.00027e-09	9.34411e-09	9.7006e-09
3		1.65814e-09	1.72043e-09	1.78536e-09	1.85304e-09	1.92355e-09	1.99696e-09	2.07336e-09	2.15283e-09	2.23545e-09	2.32131e-09	2.4105e-09	2.5031e-09	2.59919e-09	2.69886e-09	2.8022e-09	2.9093e-09	3.02023e-09	3.1351e-09	3.25397e-09	3.37717e-09	3.50523e-09	3.63835e-09	3.77675e-09	3.92065e-09	4.07029e-09	4.22591e-09	4.38776e-09	4.55611e-09	4.73122e-09	4.91338e-09	5.10289e-09	5.30006e-09	5.50521e-09	5.71864e-09	5.94028e-09	6.17027e-09	6.40891e-09	6.65651e-09	6.91339e-09	7.17988e-09	7.45631e-09	7.74304e-09	8.04041e-09	8.34882e-09	8.66864e-09	9.00027e-09	9.34411e-09	9.7006e-09
9		0.000508362	0.000553219	0.000599966	0.000648331	0.000698115	0.000749159	0.000801302	0.000854307	0.000907777	0.000961076	0.00101336	0.00106377	0.00111165	0.00115638	0.00119738	0.00123413	0.00126606	0.00129276	0.0013138	0.00132885	0.00133775	0.00134037	0.00133673	0.00132692	0.00131113	0.00128966	0.00126292	0.00123139	0.00119562	0.00115617	0.00111363	0.00106854	0.00102142	0.000972697	0.000922643	0.000871513	0.000819539	0.000766961	0.000714048	0.000661048	0.000608174	0.000555637	0.000503675	0.000452559	0.000402593	0.000354113	0.000307481	0.000263073
14		0.000982392	0.00116089	0.00135474	0.00156358	0.00178711	0.00202527	0.00227831	0.00254693	0.0028323	0.00313591	0.00345945	0.00380445	0.00417217	0.00456368	0.00497997	0.00542207	0.00589072	0.00638601	0.0069074	0.00745439	0.00802655	0.00862223	0.00923914	0.00987444	0.0105245	0.011185	0.0118507	0.0125158	0.0131739	0.0138176	0.0144394	0.0150308	0.0155834	0.0160882	0.0165351	0.0169149	0.0172193	0.0174412	0.0175747	0.0176149	0.0175586	0.0174036	0.0171498	0.0167986	0.0163532	0.0158187	0.0152017	0.0145108
19		0.000115396	0.000135171	0.000156512	0.000179583	0.000204678	0.000232265	0.000263026	0.000302733	0.000351123	0.000409443	0.000479959	0.000565131	0.000667507	0.000789611	0.000933865	0.00110256	0.00129794	0.00152215	0.00177714	0.0020648	0.00238702	0.0027454	0.00314133	0.00357598	0.00405034	0.00456516	0.00512081	0.00571715	0.00635342	0.00702819	0.00773932	0.0084839	0.00925815	0.0100572	0.0108747	0.0117032	0.012535	0.0133614	0.0141729	0.0149594	0.0157104	0.0164154	0.0170637	0.0176448	0.0181488	0.0185667	0.0188905	0.0191135
24		4.53485e-06	4.29525e-06	3.94317e-06	3.4481e-06	2.76948e-06	1.88126e-06	7.8065e-07	0	0	0	0	0	0	5.32218e-06	1.50332e-05	2.91398e-05	4.93522e-05	8.13832e-05	0.00012391	0.000177976	0.000245318	0.000330826	0.000439941	0.000571822	0.000729043	0.000914146	0.0011296	0.00137774	0.00166073	0.0019805	0.00233877	0.00273688	0.00317578	0.00365582	0.00417636	0.004736	0.00533259	0.00596315	0.00662382	0.00730989	0.00801588	0.0087355	0.0094615	0.0101857	0.0108991	0.0115923	0.0122559	0.01288
30		4.20389e-09	4.3606e-09	4.50483e-09	4.49664e-08	3.57458e-08	3.0744e-08	1.31415e-08	1.36227e-08	1.37875e-08	1.13486e-08	0	0	0	0	0	0	0	0	8.8147e-07	3.6709e-06	7.54425e-06	1.27314e-05	1.95088e-05	2.8397e-05	4.36903e-05	6.65586e-05	0.000100552	0.000144423	0.00019983	0.000270584	0.000361748	0.000472869	0.000606262	0.000764136	0.000948462	0.00116096	0.00140301	0.00167556	0.00197903	0.00231331	0.00267779	0.00307128	0.00349205	0.00393778	0.00440543	0.00489125	0.00539076	0.00589887
35		5.25486e-09	5.45225e-09	5.65804e-09	5.87253e-09	6.09597e-09	6.32837e-09	6.56166e-09	6.71925e-09	5.58958e-09	4.51864e-08	4.44008e-08	3.23551e-08	3.01134e-08	1.68851e-08	1.55947e-08	0	0	0	0	0	0	0	0	0	0	0	0	0	0	2.48119e-06	1.13732e-05	2.59645e-05	5.01393e-05	8.40536e-05	0.000132816	0.000195543	0.000274051	0.00037004	0.000485008	0.000620198	0.000776548	0.000954613	0.0011545	0.00137584	0.00161776	0.00187889	0.00215744	0.00245117
40		2.89782e-14	3.00667e-14	3.12015e-14	3.23843e-14	3.36165e-14	3.48994e-14	3.62346e-14	3.76234e-14	3.90674e-14	4.05679e-14	4.21266e-14	4.37448e-14	4.54241e-14	4.7166e-14	4.89721e-14	5.08437e-14	5.27824e-14	5.47083e-14	5.56184e-14	4.90839e-14	9.59196e-09	0	0	0	0	0	0	0	0	0	0	0	0	1.76213e-06	4.81359e-06	9.01751e-06	1.79258e-05	3.42636e-05	6.02979e-05	9.75522e-05	0.000145484	0.000205317	0.000278244	0.000365282	0.000467213	0.000584517	0.000717319	0.000865346
[truncated: 229 more columns]

## Sheet: d
T (°C)	HNO3 (cps)	H2SO4 (cps)
26.92	5802.4	0.0103066
27.22	6303.4	0.015096
27.84	6473.2	0.0236965
28.82	6777.7	0.0271859
30.05	7607.7	0.0196678
31.44	8684	0.00833044
33.09	10488.7	0.00310353
34.8	12530.6	0.00638095
36.62	15686.6	0.0152206
38.6	19252.4	0.023793
40.62	23850.7	0.0280938
42.49	32237.5	0.0282151
44.6	39128.5	0.0237723
46.75	47248	0.0155366
48.97	56701.9	0.00791362
51.16	66296.7	0.0038316
53.64	76507.6	0.00254912
55.98	87683	0.00217655
58.4	98608	0.00178838
60.88	106716	0.00261931
63.14	112971	0.00580298
65.3	114733	0.00883995
67.44	112568	0.00817033
69.79	105607	0.00452041
72.3	92997	0.00149544
74.83	77367.8	0.000531642
77.32	63092.9	0.000686732
79.49	52780.4	0.00337682
81.63	45326.7	0.0145164
83.86	39011.2	0.0344109
86.37	33597.9	0.0545707
89.08	29170.8	0.078299
91.8	25853.9	0.115098
94.16	23074.3	0.153589
96.42	20853	0.192268
98.9	18843.2	0.27766
101.58	17172.7	0.458701
104.1	15804	0.717385
106.64	14358.3	0.989103
109.3	13097.2	1.27281
111.87	11965.8	1.66867
114.22	11041.5	2.23939
116.56	9968.8	2.86343
118.77	9182.1	3.29529
121.38	8405.2	3.40068
123.8	7616.9	3.29246
125.77	6878.2	3.16091
127.9	6197.2	3.02784
130.08	5718.4	2.78713
132.28	5138.7	2.43555
134.48	4582.5	2.1229
136.38	3993.9	1.94158
137.92	3470.3	1.7993
139.32	2970.3	1.60184
140.5	2616.2	1.40214
141.78	2186.3	1.27109
142.92	1939.8	1.20419
144.08	1526.8	1.16616
145.48	1021.3	1.08854
146.66	883.6	0.924482
147.39	435.1	0.74419
