# Supplementary material for: Rapid growth of new atmospheric particles by nitric acid and ammonia condensation
Source: Nature. 2020 May 13;581(7807):184–9. doi: 10.1038/s41586-020-2270-4 (PMC7334196; doi:10.1038/s41586-020-2270-4)
Supplement: Supplementary file 3 — Source Data Fig. 3 [file 41586_2020_2270_MOESM3_ESM.xlsx]

## Sheet: a
Chamber experiments					MABNAG simulations
T (°C)	HNO3 (pptv)	NH3 (pptv)	d_act (nm)		T (°C)	HNO3 (pptv)	NH3 (pptv)	Activation
+5	1117	883	2.3		+5	100	152	No
+5	640	904	3.9		+5	500.2	152	No
+5	352	1387	4.7		+5	1000.4	152	No
+5	860	259	9.4		+5	100	549	No
+5	1130	244	10		+5	379	549	No
+5	971	242	10.4		+5	4016.9	549	Yes
+5	292	370	n/a		+5	80	1501	No
-10	228	1085	1.6		+5	379	1501	Yes
-10	64	2371	2.1		+5	1500.7	1501	Yes
-10	41	2659	2.4		-10	1	200	No
-10	59	2654	2.9		-10	5	200	No
-10	24	2077	4.5		-10	10	200	No
-10	23	1835	4.5		-10	0.5	1800	No
-10	24	2131	4.6		-10	3.6	1800	Yes
-10	30	1694	4.9		-10	20	1800	Yes
-10	16	1663	5.9
-10	16	2535	6.5

## Sheet: b
T (°C)	HNO3 (pptv)	NH3 (pptv)
-14.4981	253.643	1135.13
-15.4744	294.066	1119.42
-16.3356	338.106	1425.17
-17.2079	280.833	1765.68
-18.3827	262.814	1667.73
-19.6233	268.404	1782.93
-20.646	290.345	1863.01
-21.5771	263.58	1934.32
-22.8198	244.48	1703.61
-24.1319	245.696	1703.71
-25.1804	251.061	2014.64

## Sheet: c
T (°C)	J_1.7 (cm^-3 s^-1)	J_1.7_err (cm^-3 s^-1)
-14.4981	0.00380004	0.00114001
-15.4744	0.00567493	0.00170248
-16.3356	0.0113376	0.00340128
-17.2079	0.0136139	0.00408417
-18.3827	0.0183949	0.00551847
-19.6233	0.0202677	0.00608031
-20.646	0.0271129	0.00813387
-21.5771	0.0395341	0.0118602
-22.8198	0.0464451	0.0139335
-24.1319	0.0598501	0.017955
-25.1804	0.0491298	0.0147389
