# Supplementary material for: Rapid growth of new atmospheric particles by nitric acid and ammonia condensation
Source: Nature. 2020 May 13;581(7807):184–9. doi: 10.1038/s41586-020-2270-4 (PMC7334196; doi:10.1038/s41586-020-2270-4)
Supplement: Supplementary file 4 — Source Data Fig. 4 [file 41586_2020_2270_MOESM4_ESM.xlsx]

## Sheet: c
Time (s)	d_p (m)
0.00100085	1.34786e-09
0.00100171	1.34786e-09
0.00100256	1.34786e-09
0.00100342	1.34786e-09
0.00100428	1.34786e-09
0.00100513	1.34786e-09
0.00100599	1.34786e-09
0.00100685	1.34786e-09
0.00100771	1.34786e-09
0.00100857	1.34786e-09
0.00100943	1.34786e-09
0.00101029	1.34786e-09
0.00101116	1.34786e-09
0.00101202	1.34786e-09
0.00101288	1.34786e-09
0.00101375	1.34786e-09
0.00101461	1.34786e-09
0.00101548	1.34786e-09
0.00101635	1.34786e-09
0.00101721	1.34786e-09
0.00101808	1.34786e-09
0.00101895	1.34786e-09
0.00101982	1.34786e-09
0.00102069	1.34786e-09
0.00102156	1.34786e-09
0.00102244	1.34786e-09
0.00102331	1.34786e-09
0.00102418	1.34786e-09
0.00102506	1.34786e-09
0.00102593	1.34786e-09
0.00102681	1.34786e-09
0.00102768	1.34786e-09
0.00102856	1.34786e-09
0.00102944	1.34786e-09
0.00103032	1.34786e-09
0.0010312	1.34786e-09
0.00103208	1.34786e-09
0.00103296	1.34786e-09
0.00103384	1.34786e-09
0.00103472	1.34786e-09
0.00103561	1.34786e-09
0.00103649	1.34786e-09
0.00103738	1.34786e-09
0.00103826	1.34786e-09
0.00103915	1.34786e-09
0.00104004	1.34786e-09
0.00104092	1.34786e-09
0.00104181	1.34786e-09
0.0010427	1.34786e-09
0.00104359	1.34786e-09
0.00104448	1.34786e-09
0.00104537	1.34786e-09
0.00104627	1.34786e-09
0.00104716	1.34786e-09
0.00104805	1.34787e-09
0.00104895	1.34787e-09
0.00104985	1.34787e-09
0.00105074	1.34787e-09
0.00105164	1.34787e-09
0.00105254	1.34787e-09
0.00105343	1.34787e-09
0.00105433	1.34787e-09
0.00105523	1.34787e-09
0.00105614	1.34787e-09
0.00105704	1.34788e-09
0.00105794	1.34788e-09
0.00105884	1.34788e-09
0.00105975	1.34788e-09
0.00106065	1.34788e-09
0.00106156	1.34788e-09
0.00106246	1.34788e-09
0.00106337	1.34788e-09
0.00106428	1.34788e-09
0.00106519	1.34788e-09
0.0010661	1.34788e-09
0.00106701	1.34788e-09
0.00106792	1.34788e-09
0.00106883	1.34788e-09
0.00106974	1.34788e-09
0.00107065	1.34788e-09
0.00107157	1.34788e-09
0.00107248	1.34788e-09
0.0010734	1.34788e-09
0.00107432	1.34788e-09
0.00107523	1.34788e-09
0.00107615	1.34788e-09
0.00107707	1.34788e-09
0.00107799	1.34788e-09
0.00107891	1.34788e-09
0.00107983	1.34788e-09
0.00108075	1.34788e-09
0.00108168	1.34788e-09
0.0010826	1.34788e-09
0.00108352	1.34788e-09
0.00108445	1.34788e-09
0.00108537	1.34788e-09
0.0010863	1.34788e-09
0.00108723	1.34788e-09
0.00108816	1.34788e-09
0.00108908	1.34788e-09
0.00109001	1.34788e-09
0.00109095	1.34788e-09
0.00109188	1.34788e-09
0.00109281	1.34788e-09
0.00109374	1.34788e-09
0.00109468	1.34788e-09
0.00109561	1.34788e-09
0.00109655	1.34788e-09
0.00109748	1.34788e-09
0.00109842	1.34788e-09
0.00109936	1.34788e-09
0.0011003	1.34788e-09
0.00110123	1.34788e-09
0.00110217	1.34788e-09
0.00110312	1.34788e-09
0.00110406	1.34788e-09
0.001105	1.34788e-09
0.00110594	1.34788e-09
0.00110689	1.34788e-09
0.00110783	1.34788e-09
0.00110878	1.34788e-09
0.00110972	1.34788e-09
0.00111067	1.34788e-09
0.00111162	1.34788e-09
0.00111257	1.34788e-09
0.00111352	1.34788e-09
0.00111447	1.34788e-09
0.00111542	1.34788e-09
0.00111637	1.34788e-09
0.00111733	1.34788e-09
0.00111828	1.34788e-09
0.00111924	1.34788e-09
0.00112019	1.34788e-09
0.00112115	1.34788e-09
0.0011221	1.34788e-09
0.00112306	1.34788e-09
0.00112402	1.34788e-09
0.00112498	1.34788e-09
0.00112594	1.34788e-09
0.0011269	1.34788e-09
0.00112786	1.34788e-09
0.00112883	1.34788e-09
0.00112979	1.34788e-09
0.00113076	1.34788e-09
0.00113172	1.34788e-09
0.00113269	1.34788e-09
0.00113365	1.34788e-09
0.00113462	1.34788e-09
0.00113559	1.34788e-09
0.00113656	1.34788e-09
0.00113753	1.34788e-09
0.0011385	1.34788e-09
0.00113947	1.34788e-09
0.00114045	1.34788e-09
0.00114142	1.34788e-09
0.0011424	1.34788e-09
0.00114337	1.34788e-09
0.00114435	1.34788e-09
0.00114532	1.34788e-09
0.0011463	1.34788e-09
0.00114728	1.34789e-09
0.00114826	1.34789e-09
0.00114924	1.34789e-09
0.00115022	1.34789e-09
0.0011512	1.34789e-09
0.00115219	1.34789e-09
0.00115317	1.34789e-09
0.00115415	1.34789e-09
0.00115514	1.34789e-09
0.00115613	1.34789e-09
0.00115711	1.34789e-09
0.0011581	1.34789e-09
0.00115909	1.34789e-09
0.00116008	1.34789e-09
0.00116107	1.34789e-09
0.00116206	1.34789e-09
0.00116305	1.34789e-09
0.00116405	1.34789e-09
0.00116504	1.34789e-09
0.00116603	1.34789e-09
0.00116703	1.34789e-09
0.00116803	1.34789e-09
0.00116902	1.34789e-09
0.00117002	1.34789e-09
0.00117102	1.34789e-09
0.00117202	1.34789e-09
0.00117302	1.34789e-09
0.00117402	1.34789e-09
0.00117502	1.34789e-09
0.00117603	1.34789e-09
0.00117703	1.34789e-09
0.00117804	1.34789e-09
0.00117904	1.34789e-09
0.00118005	1.34789e-09
0.00118106	1.34789e-09
0.00118206	1.34789e-09
0.00118307	1.34789e-09
0.00118408	1.34789e-09
0.00118509	1.34789e-09
0.00118611	1.34789e-09
0.00118712	1.34789e-09
0.00118813	1.34789e-09
0.00118915	1.34789e-09
0.00119016	1.34789e-09
0.00119118	1.34789e-09
0.00119219	1.34789e-09
0.00119321	1.34789e-09
0.00119423	1.34789e-09
0.00119525	1.34789e-09
0.00119627	1.34789e-09
0.00119729	1.34789e-09
0.00119831	1.34789e-09
0.00119934	1.34789e-09
0.00120036	1.34789e-09
0.00120139	1.34789e-09
0.00120241	1.34789e-09
0.00120344	1.34789e-09
0.00120447	1.34789e-09
0.00120549	1.34789e-09
0.00120652	1.34789e-09
0.00120755	1.34789e-09
0.00120858	1.34789e-09
0.00120962	1.34789e-09
0.00121065	1.34789e-09
0.00121168	1.34789e-09
0.00121272	1.34789e-09
0.00121375	1.34789e-09
0.00121479	1.34789e-09
0.00121583	1.34789e-09
0.00121686	1.34789e-09
0.0012179	1.34789e-09
0.00121894	1.34789e-09
0.00121998	1.34789e-09
0.00122102	1.34789e-09
0.00122207	1.34789e-09
0.00122311	1.34789e-09
0.00122415	1.34789e-09
0.0012252	1.34789e-09
0.00122625	1.34789e-09
0.00122729	1.34789e-09
0.00122834	1.34789e-09
0.00122939	1.34789e-09
0.00123044	1.34789e-09
0.00123149	1.34789e-09
0.00123254	1.34789e-09
0.00123359	1.34789e-09
0.00123465	1.34789e-09
0.0012357	1.34789e-09
0.00123676	1.34789e-09
0.00123781	1.34789e-09
0.00123887	1.34789e-09
0.00123993	1.34789e-09
0.00124098	1.34789e-09
0.00124204	1.34789e-09
0.0012431	1.34789e-09
0.00124417	1.34789e-09
0.00124523	1.34789e-09
0.00124629	1.34789e-09
0.00124735	1.34789e-09
0.00124842	1.34789e-09
0.00124949	1.34789e-09
0.00125055	1.3479e-09
0.00125162	1.3479e-09
0.00125269	1.3479e-09
0.00125376	1.3479e-09
0.00125483	1.3479e-09
0.0012559	1.3479e-09
0.00125697	1.3479e-09
0.00125804	1.3479e-09
0.00125912	1.3479e-09
0.00126019	1.3479e-09
0.00126127	1.3479e-09
0.00126235	1.3479e-09
0.00126342	1.3479e-09
0.0012645	1.3479e-09
0.00126558	1.3479e-09
0.00126666	1.3479e-09
0.00126774	1.3479e-09
0.00126883	1.3479e-09
0.00126991	1.3479e-09
0.00127099	1.3479e-09
0.00127208	1.3479e-09
0.00127317	1.3479e-09
0.00127425	1.3479e-09
0.00127534	1.3479e-09
0.00127643	1.3479e-09
0.00127752	1.3479e-09
0.00127861	1.3479e-09
0.0012797	1.3479e-09
0.00128079	1.3479e-09
0.00128189	1.3479e-09
0.00128298	1.3479e-09
0.00128408	1.3479e-09
0.00128517	1.3479e-09
0.00128627	1.3479e-09
0.00128737	1.3479e-09
0.00128847	1.3479e-09
0.00128957	1.34791e-09
0.00129067	1.34791e-09
0.00129177	1.34791e-09
0.00129287	1.34791e-09
0.00129398	1.34791e-09
0.00129508	1.34791e-09
0.00129619	1.34791e-09
0.00129729	1.34791e-09
0.0012984	1.34791e-09
0.00129951	1.34791e-09
0.00130062	1.34791e-09
0.00130173	1.34791e-09
0.00130284	1.34791e-09
0.00130395	1.34791e-09
0.00130507	1.34791e-09
0.00130618	1.34791e-09
0.0013073	1.34791e-09
0.00130841	1.34791e-09
0.00130953	1.34791e-09
0.00131065	1.34791e-09
0.00131177	1.34791e-09
0.00131289	1.34791e-09
0.00131401	1.34791e-09
0.00131513	1.34791e-09
0.00131625	1.34791e-09
0.00131738	1.34791e-09
0.0013185	1.34791e-09
0.00131963	1.34791e-09
0.00132075	1.34791e-09
0.00132188	1.34791e-09
0.00132301	1.34791e-09
0.00132414	1.34791e-09
0.00132527	1.34791e-09
0.0013264	1.34791e-09
0.00132753	1.34791e-09
0.00132867	1.34791e-09
0.0013298	1.34791e-09
0.00133093	1.34791e-09
0.00133207	1.34791e-09
0.00133321	1.34791e-09
0.00133435	1.34791e-09
0.00133549	1.34791e-09
0.00133663	1.34791e-09
0.00133777	1.34791e-09
0.00133891	1.34791e-09
0.00134005	1.34791e-09
0.0013412	1.34791e-09
0.00134234	1.34791e-09
0.00134349	1.34791e-09
0.00134463	1.34791e-09
0.00134578	1.34791e-09
0.00134693	1.34791e-09
0.00134808	1.34791e-09
0.00134923	1.34791e-09
0.00135038	1.34791e-09
0.00135154	1.34791e-09
0.00135269	1.34791e-09
0.00135385	1.34791e-09
0.001355	1.34791e-09
0.00135616	1.34791e-09
0.00135732	1.34791e-09
0.00135848	1.34791e-09
0.00135963	1.34792e-09
0.0013608	1.34792e-09
0.00136196	1.34792e-09
0.00136312	1.34792e-09
0.00136428	1.34792e-09
0.00136545	1.34792e-09
0.00136661	1.34792e-09
0.00136778	1.34792e-09
0.00136895	1.34792e-09
0.00137012	1.34792e-09
0.00137129	1.34792e-09
0.00137246	1.34792e-09
0.00137363	1.34792e-09
0.0013748	1.34792e-09
0.00137598	1.34792e-09
0.00137715	1.34792e-09
0.00137833	1.34792e-09
0.0013795	1.34792e-09
0.00138068	1.34792e-09
0.00138186	1.34792e-09
0.00138304	1.34792e-09
0.00138422	1.34792e-09
0.0013854	1.34792e-09
0.00138658	1.34792e-09
0.00138777	1.34792e-09
0.00138895	1.34792e-09
0.00139014	1.34792e-09
0.00139133	1.34792e-09
0.00139251	1.34792e-09
0.0013937	1.34792e-09
0.00139489	1.34792e-09
0.00139608	1.34792e-09
0.00139728	1.34792e-09
0.00139847	1.34792e-09
0.00139966	1.34792e-09
0.00140086	1.34792e-09
0.00140205	1.34792e-09
0.00140325	1.34792e-09
0.00140445	1.34792e-09
0.00140565	1.34792e-09
0.00140685	1.34792e-09
0.00140805	1.34792e-09
0.00140925	1.34792e-09
0.00141045	1.34792e-09
0.00141166	1.34792e-09
0.00141286	1.34792e-09
0.00141407	1.34792e-09
0.00141528	1.34792e-09
0.00141648	1.34792e-09
0.00141769	1.34792e-09
0.0014189	1.34792e-09
0.00142012	1.34792e-09
0.00142133	1.34792e-09
0.00142254	1.34792e-09
0.00142376	1.34792e-09
0.00142497	1.34792e-09
0.00142619	1.34792e-09
0.00142741	1.34792e-09
0.00142862	1.34792e-09
0.00142984	1.34792e-09
0.00143106	1.34792e-09
0.00143229	1.34792e-09
0.00143351	1.34792e-09
0.00143473	1.34792e-09
0.00143596	1.34792e-09
0.00143718	1.34792e-09
0.00143841	1.34792e-09
0.00143964	1.34792e-09
0.00144087	1.34792e-09
0.0014421	1.34792e-09
0.00144333	1.34792e-09
0.00144456	1.34792e-09
0.0014458	1.34792e-09
0.00144703	1.34792e-09
0.00144826	1.34792e-09
0.0014495	1.34792e-09
0.00145074	1.34792e-09
0.00145198	1.34792e-09
0.00145322	1.34792e-09
0.00145446	1.34792e-09
0.0014557	1.34792e-09
0.00145694	1.34792e-09
0.00145819	1.34792e-09
0.00145943	1.34792e-09
0.00146068	1.34792e-09
0.00146192	1.34792e-09
0.00146317	1.34792e-09
0.00146442	1.34792e-09
0.00146567	1.34792e-09
0.00146692	1.34792e-09
0.00146818	1.34792e-09
0.00146943	1.34792e-09
0.00147068	1.34792e-09
0.00147194	1.34792e-09
0.0014732	1.34792e-09
0.00147445	1.34792e-09
0.00147571	1.34792e-09
0.00147697	1.34792e-09
0.00147823	1.34792e-09
0.00147949	1.34792e-09
0.00148076	1.34792e-09
0.00148202	1.34792e-09
0.00148329	1.34792e-09
0.00148455	1.34792e-09
0.00148582	1.34792e-09
0.00148709	1.34792e-09
0.00148836	1.34792e-09
0.00148963	1.34792e-09
0.0014909	1.34792e-09
0.00149217	1.34792e-09
0.00149345	1.34792e-09
0.00149472	1.34792e-09
0.001496	1.34792e-09
0.00149728	1.34792e-09
0.00149855	1.34792e-09
0.00149983	1.34792e-09
0.00150111	1.34792e-09
0.0015024	1.34792e-09
0.00150368	1.34792e-09
0.00150496	1.34792e-09
0.00150625	1.34792e-09
0.00150753	1.34792e-09
0.00150882	1.34792e-09
0.00151011	1.34793e-09
0.0015114	1.34793e-09
0.00151269	1.34793e-09
0.00151398	1.34793e-09
0.00151527	1.34792e-09
0.00151657	1.34792e-09
0.00151786	1.34793e-09
0.00151916	1.34793e-09
0.00152045	1.34793e-09
0.00152175	1.34793e-09
0.00152305	1.34793e-09
0.00152435	1.34793e-09
0.00152565	1.34793e-09
0.00152696	1.34793e-09
0.00152826	1.34794e-09
0.00152956	1.34794e-09
0.00153087	1.34794e-09
0.00153218	1.34794e-09
0.00153348	1.34794e-09
0.00153479	1.34794e-09
0.0015361	1.34794e-09
0.00153742	1.34794e-09
0.00153873	1.34794e-09
0.00154004	1.34794e-09
0.00154136	1.34794e-09
0.00154267	1.34794e-09
0.00154399	1.34794e-09
0.00154531	1.34794e-09
0.00154663	1.34794e-09
0.00154795	1.34794e-09
0.00154927	1.34794e-09
0.00155059	1.34794e-09
0.00155192	1.34794e-09
0.00155324	1.34794e-09
0.00155457	1.34794e-09
0.00155589	1.34794e-09
0.00155722	1.34794e-09
0.00155855	1.34794e-09
0.00155988	1.34794e-09
0.00156121	1.34794e-09
0.00156255	1.34794e-09
0.00156388	1.34794e-09
0.00156522	1.34794e-09
0.00156655	1.34794e-09
0.00156789	1.34794e-09
0.00156923	1.34794e-09
0.00157057	1.34794e-09
0.00157191	1.34794e-09
0.00157325	1.34794e-09
0.00157459	1.34794e-09
0.00157594	1.34794e-09
0.00157728	1.34794e-09
0.00157863	1.34794e-09
0.00157998	1.34794e-09
0.00158133	1.34794e-09
0.00158268	1.34794e-09
0.00158403	1.34794e-09
0.00158538	1.34794e-09
0.00158673	1.34794e-09
0.00158809	1.34794e-09
0.00158944	1.34794e-09
0.0015908	1.34794e-09
0.00159216	1.34794e-09
0.00159352	1.34794e-09
0.00159488	1.34794e-09
0.00159624	1.34794e-09
0.0015976	1.34794e-09
0.00159897	1.34794e-09
0.00160033	1.34794e-09
0.0016017	1.34794e-09
0.00160307	1.34794e-09
0.00160443	1.34794e-09
0.0016058	1.34794e-09
0.00160718	1.34794e-09
0.00160855	1.34794e-09
0.00160992	1.34794e-09
0.0016113	1.34795e-09
0.00161267	1.34795e-09
0.00161405	1.34795e-09
0.00161543	1.34795e-09
0.0016168	1.34795e-09
0.00161819	1.34795e-09
0.00161957	1.34795e-09
0.00162095	1.34795e-09
0.00162233	1.34795e-09
0.00162372	1.34795e-09
0.0016251	1.34795e-09
0.00162649	1.34795e-09
0.00162788	1.34795e-09
0.00162927	1.34795e-09
0.00163066	1.34795e-09
0.00163205	1.34795e-09
0.00163345	1.34795e-09
0.00163484	1.34795e-09
0.00163624	1.34795e-09
0.00163763	1.34795e-09
0.00163903	1.34795e-09
0.00164043	1.34795e-09
0.00164183	1.34795e-09
0.00164323	1.34795e-09
0.00164464	1.34795e-09
0.00164604	1.34795e-09
0.00164745	1.34795e-09
0.00164885	1.34795e-09
0.00165026	1.34795e-09
0.00165167	1.34795e-09
0.00165308	1.34795e-09
0.00165449	1.34795e-09
0.0016559	1.34795e-09
0.00165732	1.34795e-09
0.00165873	1.34795e-09
0.00166015	1.34795e-09
0.00166157	1.34795e-09
0.00166298	1.34795e-09
0.0016644	1.34795e-09
0.00166582	1.34795e-09
0.00166725	1.34795e-09
0.00166867	1.34795e-09
0.00167009	1.34795e-09
0.00167152	1.34795e-09
0.00167295	1.34795e-09
0.00167438	1.34795e-09
0.00167581	1.34795e-09
0.00167724	1.34795e-09
0.00167867	1.34795e-09
0.0016801	1.34795e-09
0.00168154	1.34795e-09
0.00168297	1.34795e-09
0.00168441	1.34795e-09
0.00168585	1.34795e-09
0.00168729	1.34795e-09
0.00168873	1.34795e-09
0.00169017	1.34795e-09
0.00169161	1.34795e-09
0.00169305	1.34795e-09
0.0016945	1.34795e-09
0.00169595	1.34795e-09
0.00169739	1.34795e-09
0.00169884	1.34795e-09
0.00170029	1.34795e-09
0.00170175	1.34795e-09
0.0017032	1.34795e-09
0.00170465	1.34795e-09
0.00170611	1.34795e-09
0.00170756	1.34795e-09
0.00170902	1.34795e-09
0.00171048	1.34795e-09
0.00171194	1.34795e-09
0.0017134	1.34795e-09
0.00171487	1.34795e-09
0.00171633	1.34795e-09
0.0017178	1.34795e-09
0.00171926	1.34795e-09
0.00172073	1.34795e-09
0.0017222	1.34795e-09
0.00172367	1.34795e-09
0.00172514	1.34795e-09
0.00172661	1.34795e-09
0.00172809	1.34795e-09
0.00172956	1.34795e-09
0.00173104	1.34795e-09
0.00173252	1.34795e-09
0.001734	1.34795e-09
0.00173548	1.34795e-09
0.00173696	1.34795e-09
0.00173844	1.34795e-09
0.00173993	1.34795e-09
0.00174141	1.34795e-09
0.0017429	1.34795e-09
0.00174439	1.34795e-09
0.00174588	1.34795e-09
0.00174737	1.34795e-09
0.00174886	1.34795e-09
0.00175035	1.34795e-09
0.00175184	1.34795e-09
0.00175334	1.34795e-09
0.00175484	1.34795e-09
0.00175634	1.34795e-09
0.00175784	1.34795e-09
0.00175934	1.34795e-09
0.00176084	1.34795e-09
0.00176234	1.34795e-09
0.00176385	1.34795e-09
0.00176535	1.34795e-09
0.00176686	1.34796e-09
0.00176837	1.34796e-09
0.00176988	1.34796e-09
0.00177139	1.34796e-09
0.0017729	1.34796e-09
0.00177441	1.34796e-09
0.00177593	1.34796e-09
0.00177744	1.34796e-09
0.00177896	1.34796e-09
0.00178048	1.34797e-09
0.001782	1.34797e-09
0.00178352	1.34797e-09
0.00178505	1.34797e-09
0.00178657	1.34797e-09
0.00178809	1.34797e-09
0.00178962	1.34797e-09
0.00179115	1.34797e-09
0.00179268	1.34797e-09
0.00179421	1.34797e-09
0.00179574	1.34797e-09
0.00179727	1.34797e-09
0.00179881	1.34797e-09
0.00180034	1.34797e-09
0.00180188	1.34797e-09
0.00180342	1.34797e-09
0.00180496	1.34797e-09
0.0018065	1.34797e-09
0.00180804	1.34797e-09
0.00180959	1.34797e-09
0.00181113	1.34797e-09
0.00181268	1.34797e-09
0.00181422	1.34797e-09
0.00181577	1.34797e-09
0.00181732	1.34797e-09
0.00181887	1.34797e-09
0.00182043	1.34797e-09
0.00182198	1.34797e-09
0.00182354	1.34797e-09
0.00182509	1.34797e-09
0.00182665	1.34797e-09
0.00182821	1.34797e-09
0.00182977	1.34797e-09
0.00183133	1.34797e-09
0.0018329	1.34797e-09
0.00183446	1.34797e-09
0.00183603	1.34797e-09
0.0018376	1.34797e-09
0.00183917	1.34797e-09
0.00184074	1.34797e-09
0.00184231	1.34797e-09
0.00184388	1.34797e-09
0.00184545	1.34797e-09
0.00184703	1.34797e-09
0.00184861	1.34797e-09
0.00185019	1.34797e-09
0.00185176	1.34797e-09
0.00185335	1.34797e-09
0.00185493	1.34797e-09
0.00185651	1.34797e-09
0.0018581	1.34798e-09
0.00185968	1.34798e-09
0.00186127	1.34798e-09
0.00186286	1.34798e-09
0.00186445	1.34797e-09
0.00186604	1.34798e-09
0.00186763	1.34798e-09
0.00186923	1.34798e-09
0.00187083	1.34798e-09
0.00187242	1.34798e-09
0.00187402	1.34798e-09
0.00187562	1.34798e-09
0.00187722	1.34798e-09
0.00187882	1.34798e-09
0.00188043	1.34798e-09
0.00188203	1.34798e-09
0.00188364	1.34798e-09
0.00188525	1.34798e-09
0.00188686	1.34798e-09
0.00188847	1.34798e-09
0.00189008	1.34798e-09
0.0018917	1.34798e-09
0.00189331	1.34798e-09
0.00189493	1.34798e-09
0.00189654	1.34798e-09
0.00189816	1.34798e-09
0.00189978	1.34798e-09
0.00190141	1.34798e-09
0.00190303	1.34798e-09
0.00190465	1.34798e-09
0.00190628	1.34798e-09
0.00190791	1.34798e-09
0.00190954	1.34798e-09
0.00191117	1.34798e-09
0.0019128	1.34798e-09
0.00191443	1.34798e-09
0.00191607	1.34798e-09
0.0019177	1.34798e-09
0.00191934	1.34798e-09
0.00192098	1.34798e-09
0.00192262	1.34798e-09
0.00192426	1.34798e-09
0.0019259	1.34798e-09
0.00192755	1.34798e-09
0.00192919	1.34798e-09
0.00193084	1.34798e-09
0.00193249	1.34798e-09
0.00193414	1.34798e-09
0.00193579	1.34798e-09
0.00193744	1.34798e-09
0.0019391	1.34798e-09
0.00194075	1.34798e-09
0.00194241	1.34798e-09
0.00194407	1.34798e-09
0.00194573	1.34798e-09
0.00194739	1.34798e-09
0.00194905	1.34798e-09
0.00195071	1.34798e-09
0.00195238	1.34798e-09
0.00195405	1.34798e-09
0.00195571	1.34798e-09
0.00195738	1.34798e-09
0.00195905	1.34798e-09
0.00196073	1.34798e-09
0.0019624	1.34798e-09
0.00196408	1.34798e-09
0.00196575	1.34798e-09
0.00196743	1.34798e-09
0.00196911	1.34798e-09
0.00197079	1.34798e-09
0.00197247	1.34798e-09
0.00197416	1.34798e-09
0.00197584	1.34798e-09
0.00197753	1.34798e-09
0.00197922	1.34798e-09
0.00198091	1.34798e-09
0.0019826	1.34798e-09
0.00198429	1.34798e-09
0.00198599	1.34798e-09
0.00198768	1.34798e-09
0.00198938	1.34798e-09
0.00199108	1.34798e-09
0.00199278	1.34798e-09
0.00199448	1.34798e-09
0.00199618	1.34798e-09
0.00199789	1.348e-09
0.00199959	1.348e-09
0.0020013	1.348e-09
0.00200301	1.348e-09
0.00200472	1.348e-09
0.00200643	1.348e-09
0.00200814	1.348e-09
0.00200986	1.348e-09
0.00201157	1.348e-09
0.00201329	1.348e-09
0.00201501	1.348e-09
0.00201673	1.348e-09
0.00201845	1.348e-09
0.00202017	1.348e-09
0.0020219	1.348e-09
0.00202362	1.348e-09
0.00202535	1.348e-09
0.00202708	1.348e-09
0.00202881	1.348e-09
0.00203054	1.348e-09
0.00203228	1.348e-09
0.00203401	1.348e-09
0.00203575	1.348e-09
0.00203749	1.348e-09
0.00203923	1.348e-09
0.00204097	1.348e-09
0.00204271	1.348e-09
0.00204445	1.348e-09
0.0020462	1.348e-09
0.00204795	1.348e-09
0.0020497	1.348e-09
0.00205145	1.348e-09
0.0020532	1.348e-09
0.00205495	1.348e-09
0.0020567	1.348e-09
0.00205846	1.348e-09
0.00206022	1.348e-09
0.00206198	1.348e-09
0.00206374	1.348e-09
0.0020655	1.348e-09
0.00206726	1.348e-09
0.00206903	1.348e-09
0.00207079	1.348e-09
0.00207256	1.348e-09
0.00207433	1.348e-09
0.0020761	1.348e-09
0.00207787	1.34801e-09
0.00207965	1.34801e-09
0.00208142	1.34801e-09
0.0020832	1.34801e-09
0.00208498	1.34801e-09
0.00208676	1.34801e-09
0.00208854	1.34801e-09
0.00209032	1.34801e-09
0.00209211	1.34801e-09
0.00209389	1.34801e-09
0.00209568	1.34801e-09
0.00209747	1.34801e-09
0.00209926	1.34801e-09
0.00210105	1.34801e-09
0.00210285	1.34801e-09
0.00210464	1.34801e-09
0.00210644	1.34801e-09
0.00210824	1.34801e-09
0.00211004	1.34801e-09
0.00211184	1.34801e-09
0.00211364	1.34801e-09
0.00211545	1.34801e-09
0.00211725	1.34801e-09
0.00211906	1.34801e-09
0.00212087	1.34801e-09
0.00212268	1.34801e-09
0.00212449	1.34801e-09
0.00212631	1.34801e-09
0.00212812	1.34801e-09
0.00212994	1.34801e-09
0.00213176	1.34801e-09
0.00213358	1.34801e-09
0.0021354	1.34801e-09
0.00213722	1.34801e-09
0.00213905	1.34801e-09
0.00214087	1.34801e-09
0.0021427	1.34801e-09
0.00214453	1.34801e-09
0.00214636	1.34801e-09
0.00214819	1.34801e-09
0.00215003	1.34801e-09
0.00215186	1.34801e-09
0.0021537	1.34801e-09
0.00215554	1.34801e-09
0.00215738	1.34801e-09
0.00215922	1.34801e-09
0.00216106	1.34801e-09
0.00216291	1.34801e-09
0.00216476	1.34801e-09
0.0021666	1.34801e-09
0.00216845	1.34801e-09
0.0021703	1.34801e-09
0.00217216	1.34801e-09
0.00217401	1.34801e-09
0.00217587	1.34801e-09
0.00217773	1.34801e-09
0.00217958	1.34801e-09
0.00218145	1.34801e-09
0.00218331	1.34801e-09
0.00218517	1.34801e-09
0.00218704	1.34801e-09
0.0021889	1.34801e-09
0.00219077	1.34801e-09
0.00219264	1.34801e-09
0.00219452	1.34801e-09
0.00219639	1.34801e-09
0.00219826	1.34801e-09
0.00220014	1.34801e-09
0.00220202	1.34801e-09
0.0022039	1.34801e-09
0.00220578	1.34801e-09
0.00220766	1.34801e-09
0.00220955	1.34801e-09
0.00221144	1.34801e-09
0.00221332	1.34801e-09
0.00221521	1.34801e-09
0.0022171	1.34801e-09
0.002219	1.34801e-09
0.00222089	1.34801e-09
0.00222279	1.34802e-09
0.00222469	1.34801e-09
0.00222658	1.34801e-09
0.00222849	1.34802e-09
0.00223039	1.34802e-09
0.00223229	1.34802e-09
0.0022342	1.34802e-09
0.00223611	1.34802e-09
0.00223801	1.34802e-09
0.00223993	1.34802e-09
0.00224184	1.34802e-09
0.00224375	1.34802e-09
0.00224567	1.34803e-09
0.00224758	1.34803e-09
0.0022495	1.34803e-09
0.00225142	1.34803e-09
0.00225335	1.34803e-09
0.00225527	1.34803e-09
0.00225719	1.34803e-09
0.00225912	1.34803e-09
0.00226105	1.34803e-09
0.00226298	1.34803e-09
0.00226491	1.34803e-09
0.00226685	1.34803e-09
0.00226878	1.34803e-09
0.00227072	1.34803e-09
0.00227266	1.34803e-09
0.0022746	1.34803e-09
0.00227654	1.34803e-09
0.00227848	1.34803e-09
0.00228043	1.34803e-09
0.00228238	1.34803e-09
0.00228432	1.34803e-09
0.00228627	1.34803e-09
0.00228823	1.34803e-09
0.00229018	1.34803e-09
0.00229213	1.34803e-09
0.00229409	1.34803e-09
0.00229605	1.34803e-09
0.00229801	1.34803e-09
0.00229997	1.34803e-09
0.00230194	1.34803e-09
0.0023039	1.34803e-09
0.00230587	1.34803e-09
0.00230784	1.34803e-09
0.00230981	1.34803e-09
0.00231178	1.34803e-09
0.00231375	1.34803e-09
0.00231573	1.34803e-09
0.00231771	1.34803e-09
0.00231968	1.34803e-09
0.00232166	1.34803e-09
0.00232365	1.34803e-09
0.00232563	1.34803e-09
0.00232762	1.34803e-09
0.0023296	1.34804e-09
0.00233159	1.34804e-09
0.00233358	1.34804e-09
0.00233557	1.34804e-09
0.00233757	1.34804e-09
0.00233956	1.34804e-09
0.00234156	1.34804e-09
0.00234356	1.34804e-09
0.00234556	1.34804e-09
0.00234756	1.34804e-09
0.00234957	1.34804e-09
0.00235157	1.34804e-09
0.00235358	1.34804e-09
0.00235559	1.34804e-09
0.0023576	1.34804e-09
0.00235962	1.34804e-09
0.00236163	1.34804e-09
0.00236365	1.34804e-09
0.00236566	1.34804e-09
0.00236768	1.34804e-09
0.0023697	1.34804e-09
0.00237173	1.34804e-09
0.00237375	1.34804e-09
0.00237578	1.34804e-09
0.00237781	1.34804e-09
0.00237984	1.34804e-09
0.00238187	1.34804e-09
0.0023839	1.34804e-09
0.00238594	1.34804e-09
0.00238798	1.34804e-09
0.00239001	1.34804e-09
0.00239205	1.34804e-09
0.0023941	1.34804e-09
0.00239614	1.34804e-09
0.00239819	1.34804e-09
0.00240023	1.34804e-09
0.00240228	1.34804e-09
0.00240433	1.34804e-09
0.00240639	1.34804e-09
0.00240844	1.34804e-09
0.0024105	1.34804e-09
0.00241255	1.34804e-09
0.00241461	1.34804e-09
0.00241668	1.34804e-09
0.00241874	1.34804e-09
0.0024208	1.34804e-09
0.00242287	1.34804e-09
0.00242494	1.34804e-09
0.00242701	1.34804e-09
0.00242908	1.34804e-09
0.00243116	1.34804e-09
0.00243323	1.34804e-09
0.00243531	1.34804e-09
0.00243739	1.34804e-09
0.00243947	1.34804e-09
0.00244155	1.34804e-09
0.00244364	1.34804e-09
0.00244572	1.34804e-09
0.00244781	1.34804e-09
0.0024499	1.34804e-09
0.00245199	1.34804e-09
0.00245408	1.34804e-09
0.00245618	1.34804e-09
0.00245828	1.34804e-09
0.00246038	1.34804e-09
0.00246248	1.34804e-09
0.00246458	1.34804e-09
0.00246668	1.34804e-09
0.00246879	1.34804e-09
0.0024709	1.34804e-09
0.00247301	1.34804e-09
0.00247512	1.34804e-09
0.00247723	1.34805e-09
0.00247935	1.34805e-09
0.00248146	1.34805e-09
0.00248358	1.34805e-09
0.0024857	1.34805e-09
0.00248782	1.34805e-09
0.00248995	1.34805e-09
0.00249207	1.34805e-09
0.0024942	1.34805e-09
0.00249633	1.34806e-09
0.00249846	1.34806e-09
0.00250059	1.34806e-09
0.00250273	1.34806e-09
0.00250487	1.34806e-09
0.002507	1.34806e-09
0.00250914	1.34806e-09
0.00251129	1.34806e-09
0.00251343	1.34806e-09
0.00251558	1.34806e-09
0.00251772	1.34806e-09
0.00251987	1.34806e-09
0.00252202	1.34806e-09
0.00252418	1.34806e-09
0.00252633	1.34806e-09
0.00252849	1.34806e-09
0.00253065	1.34806e-09
0.00253281	1.34806e-09
0.00253497	1.34806e-09
0.00253714	1.34806e-09
0.0025393	1.34806e-09
0.00254147	1.34806e-09
0.00254364	1.34806e-09
0.00254581	1.34806e-09
0.00254798	1.34806e-09
0.00255016	1.34806e-09
0.00255234	1.34806e-09
0.00255452	1.34806e-09
0.0025567	1.34806e-09
0.00255888	1.34806e-09
0.00256106	1.34806e-09
0.00256325	1.34806e-09
0.00256544	1.34806e-09
0.00256763	1.34806e-09
0.00256982	1.34806e-09
0.00257202	1.34806e-09
0.00257421	1.34806e-09
0.00257641	1.34806e-09
0.00257861	1.34807e-09
0.00258081	1.34807e-09
0.00258301	1.34807e-09
0.00258522	1.34807e-09
0.00258743	1.34807e-09
0.00258963	1.34807e-09
0.00259185	1.34807e-09
0.00259406	1.34807e-09
0.00259627	1.34807e-09
0.00259849	1.34807e-09
0.00260071	1.34807e-09
0.00260293	1.34807e-09
0.00260515	1.34807e-09
0.00260737	1.34807e-09
0.0026096	1.34807e-09
0.00261183	1.34807e-09
0.00261406	1.34807e-09
0.00261629	1.34807e-09
0.00261852	1.34807e-09
0.00262076	1.34807e-09
0.002623	1.34807e-09
0.00262524	1.34807e-09
0.00262748	1.34807e-09
0.00262972	1.34807e-09
0.00263197	1.34807e-09
0.00263421	1.34807e-09
0.00263646	1.34807e-09
0.00263871	1.34807e-09
0.00264097	1.34807e-09
0.00264322	1.34807e-09
0.00264548	1.34807e-09
0.00264773	1.34807e-09
0.00265	1.34807e-09
0.00265226	1.34807e-09
0.00265452	1.34807e-09
0.00265679	1.34807e-09
0.00265906	1.34807e-09
0.00266133	1.34807e-09
0.0026636	1.34807e-09
0.00266587	1.34807e-09
0.00266815	1.34807e-09
0.00267043	1.34807e-09
0.00267271	1.34807e-09
0.00267499	1.34807e-09
0.00267727	1.34807e-09
0.00267956	1.34807e-09
0.00268185	1.34807e-09
0.00268414	1.34807e-09
0.00268643	1.34807e-09
0.00268872	1.34807e-09
0.00269102	1.34807e-09
0.00269331	1.34807e-09
0.00269561	1.34807e-09
0.00269791	1.34807e-09
0.00270022	1.34807e-09
0.00270252	1.34807e-09
0.00270483	1.34807e-09
0.00270714	1.34807e-09
0.00270945	1.34807e-09
0.00271176	1.34807e-09
0.00271408	1.34807e-09
0.0027164	1.34808e-09
0.00271871	1.34808e-09
0.00272104	1.34808e-09
0.00272336	1.34808e-09
0.00272568	1.34808e-09
0.00272801	1.34808e-09
0.00273034	1.34808e-09
0.00273267	1.34808e-09
0.002735	1.34808e-09
0.00273734	1.34808e-09
0.00273968	1.34808e-09
0.00274201	1.34808e-09
0.00274436	1.34808e-09
0.0027467	1.34809e-09
0.00274904	1.34809e-09
0.00275139	1.34809e-09
0.00275374	1.34809e-09
0.00275609	1.34809e-09
0.00275844	1.34809e-09
0.0027608	1.34809e-09
0.00276316	1.34809e-09
0.00276551	1.34809e-09
0.00276788	1.34809e-09
0.00277024	1.34809e-09
0.0027726	1.34809e-09
0.00277497	1.34809e-09
0.00277734	1.34809e-09
0.00277971	1.34809e-09
0.00278208	1.34809e-09
0.00278446	1.34809e-09
0.00278684	1.34809e-09
0.00278922	1.34809e-09
0.0027916	1.34809e-09
0.00279398	1.34809e-09
0.00279637	1.34809e-09
0.00279875	1.34809e-09
0.00280114	1.34809e-09
0.00280353	1.34809e-09
0.00280593	1.34809e-09
0.00280832	1.34809e-09
0.00281072	1.34809e-09
0.00281312	1.34809e-09
0.00281552	1.34809e-09
0.00281793	1.34809e-09
0.00282033	1.34809e-09
0.00282274	1.34809e-09
0.00282515	1.34809e-09
0.00282756	1.34809e-09
0.00282998	1.34809e-09
0.00283239	1.34809e-09
0.00283481	1.34809e-09
0.00283723	1.34809e-09
0.00283965	1.3481e-09
0.00284208	1.3481e-09
0.0028445	1.3481e-09
0.00284693	1.3481e-09
0.00284936	1.3481e-09
0.00285179	1.3481e-09
0.00285423	1.3481e-09
0.00285667	1.3481e-09
0.0028591	1.3481e-09
0.00286155	1.3481e-09
0.00286399	1.3481e-09
0.00286643	1.3481e-09
0.00286888	1.3481e-09
0.00287133	1.3481e-09
0.00287378	1.3481e-09
0.00287624	1.3481e-09
0.00287869	1.3481e-09
0.00288115	1.3481e-09
0.00288361	1.3481e-09
0.00288607	1.3481e-09
0.00288853	1.3481e-09
0.002891	1.3481e-09
0.00289347	1.3481e-09
0.00289594	1.3481e-09
0.00289841	1.3481e-09
0.00290089	1.3481e-09
0.00290336	1.3481e-09
0.00290584	1.3481e-09
0.00290832	1.3481e-09
0.0029108	1.3481e-09
0.00291329	1.3481e-09
0.00291578	1.3481e-09
0.00291827	1.3481e-09
0.00292076	1.3481e-09
0.00292325	1.3481e-09
0.00292575	1.3481e-09
0.00292824	1.3481e-09
0.00293074	1.3481e-09
0.00293325	1.3481e-09
0.00293575	1.3481e-09
0.00293826	1.3481e-09
0.00294077	1.3481e-09
0.00294328	1.3481e-09
0.00294579	1.3481e-09
0.0029483	1.3481e-09
0.00295082	1.34811e-09
0.00295334	1.34811e-09
0.00295586	1.34811e-09
0.00295839	1.34811e-09
0.00296091	1.34812e-09
0.00296344	1.34812e-09
0.00296597	1.34812e-09
0.0029685	1.34812e-09
0.00297104	1.34812e-09
0.00297357	1.34812e-09
0.00297611	1.34812e-09
0.00297865	1.34812e-09
0.00298119	1.34812e-09
0.00298374	1.34812e-09
0.00298629	1.34812e-09
0.00298884	1.34812e-09
0.00299139	1.34812e-09
0.00299394	1.34812e-09
0.0029965	1.34812e-09
0.00299906	1.34812e-09
0.00300162	1.34812e-09
0.00300418	1.34812e-09
0.00300674	1.34812e-09
0.00300931	1.34812e-09
0.00301188	1.34812e-09
0.00301445	1.34812e-09
0.00301703	1.34812e-09
0.0030196	1.34812e-09
0.00302218	1.34812e-09
0.00302476	1.34812e-09
0.00302734	1.34812e-09
0.00302993	1.34812e-09
0.00303251	1.34812e-09
0.0030351	1.34812e-09
0.00303769	1.34812e-09
0.00304029	1.34812e-09
0.00304288	1.34812e-09
0.00304548	1.34812e-09
0.00304808	1.34812e-09
0.00305068	1.34813e-09
0.00305329	1.34813e-09
0.00305589	1.34813e-09
0.0030585	1.34813e-09
0.00306111	1.34813e-09
0.00306373	1.34813e-09
0.00306634	1.34813e-09
0.00306896	1.34813e-09
0.00307158	1.34813e-09
0.0030742	1.34813e-09
0.00307683	1.34813e-09
0.00307945	1.34813e-09
0.00308208	1.34813e-09
0.00308471	1.34813e-09
0.00308735	1.34813e-09
0.00308998	1.34813e-09
0.00309262	1.34813e-09
0.00309526	1.34813e-09
0.00309791	1.34813e-09
0.00310055	1.34813e-09
0.0031032	1.34813e-09
0.00310585	1.34813e-09
0.0031085	1.34813e-09
0.00311115	1.34813e-09
0.00311381	1.34813e-09
0.00311647	1.34813e-09
0.00311913	1.34813e-09
0.00312179	1.34813e-09
0.00312446	1.34813e-09
0.00312712	1.34813e-09
0.00312979	1.34813e-09
0.00313246	1.34813e-09
0.00313514	1.34813e-09
0.00313782	1.34813e-09
0.00314049	1.34813e-09
0.00314318	1.34813e-09
0.00314586	1.34813e-09
0.00314854	1.34813e-09
0.00315123	1.34813e-09
0.00315392	1.34813e-09
0.00315662	1.34813e-09
0.00315931	1.34813e-09
0.00316201	1.34813e-09
0.00316471	1.34813e-09
0.00316741	1.34813e-09
0.00317011	1.34813e-09
0.00317282	1.34813e-09
0.00317553	1.34813e-09
0.00317824	1.34813e-09
0.00318095	1.34813e-09
0.00318367	1.34813e-09
0.00318639	1.34813e-09
0.00318911	1.34813e-09
0.00319183	1.34814e-09
0.00319455	1.34814e-09
0.00319728	1.34814e-09
0.00320001	1.34814e-09
0.00320274	1.34814e-09
0.00320548	1.34814e-09
0.00320821	1.34814e-09
0.00321095	1.34814e-09
0.0032137	1.34814e-09
0.00321644	1.34814e-09
0.00321918	1.34814e-09
0.00322193	1.34815e-09
0.00322468	1.34815e-09
0.00322744	1.34815e-09
0.00323019	1.34815e-09
0.00323295	1.34815e-09
0.00323571	1.34815e-09
0.00323847	1.34815e-09
0.00324124	1.34815e-09
0.003244	1.34815e-09
0.00324677	1.34815e-09
0.00324955	1.34815e-09
0.00325232	1.34815e-09
0.0032551	1.34815e-09
0.00325788	1.34815e-09
0.00326066	1.34815e-09
0.00326344	1.34815e-09
0.00326623	1.34815e-09
0.00326902	1.34815e-09
0.00327181	1.34815e-09
0.0032746	1.34815e-09
0.0032774	1.34815e-09
0.00328019	1.34815e-09
0.00328299	1.34815e-09
0.0032858	1.34815e-09
0.0032886	1.34815e-09
0.00329141	1.34815e-09
0.00329422	1.34815e-09
0.00329703	1.34815e-09
0.00329985	1.34816e-09
0.00330266	1.34816e-09
0.00330548	1.34816e-09
0.00330831	1.34816e-09
0.00331113	1.34816e-09
0.00331396	1.34816e-09
0.00331679	1.34816e-09
0.00331962	1.34816e-09
0.00332245	1.34816e-09
0.00332529	1.34816e-09
0.00332813	1.34816e-09
0.00333097	1.34816e-09
0.00333381	1.34816e-09
0.00333666	1.34816e-09
0.00333951	1.34816e-09
0.00334236	1.34816e-09
0.00334521	1.34816e-09
0.00334807	1.34816e-09
0.00335093	1.34816e-09
0.00335379	1.34816e-09
0.00335665	1.34816e-09
0.00335952	1.34816e-09
0.00336238	1.34816e-09
0.00336526	1.34816e-09
0.00336813	1.34816e-09
0.003371	1.34816e-09
0.00337388	1.34816e-09
0.00337676	1.34816e-09
0.00337965	1.34816e-09
0.00338253	1.34816e-09
0.00338542	1.34816e-09
0.00338831	1.34816e-09
0.0033912	1.34816e-09
0.0033941	1.34816e-09
0.00339699	1.34816e-09
0.00339989	1.34816e-09
0.0034028	1.34816e-09
0.0034057	1.34816e-09
0.00340861	1.34816e-09
0.00341152	1.34816e-09
0.00341443	1.34816e-09
0.00341735	1.34816e-09
0.00342026	1.34816e-09
0.00342318	1.34816e-09
0.00342611	1.34816e-09
0.00342903	1.34816e-09
0.00343196	1.34816e-09
0.00343489	1.34816e-09
0.00343782	1.34816e-09
0.00344076	1.34816e-09
0.0034437	1.34816e-09
0.00344664	1.34817e-09
0.00344958	1.34817e-09
0.00345252	1.34817e-09
0.00345547	1.34817e-09
0.00345842	1.34817e-09
0.00346137	1.34817e-09
0.00346433	1.34817e-09
0.00346729	1.34817e-09
0.00347025	1.34817e-09
0.00347321	1.34818e-09
0.00347617	1.34818e-09
0.00347914	1.34818e-09
0.00348211	1.34818e-09
0.00348508	1.34818e-09
0.00348806	1.34818e-09
0.00349104	1.34818e-09
0.00349402	1.34818e-09
0.003497	1.34818e-09
0.00349999	1.34818e-09
0.00350297	1.34818e-09
0.00350597	1.34818e-09
0.00350896	1.34818e-09
0.00351195	1.34818e-09
0.00351495	1.34818e-09
0.00351795	1.34818e-09
0.00352096	1.34818e-09
0.00352396	1.34818e-09
0.00352697	1.34818e-09
0.00352998	1.34818e-09
0.003533	1.34818e-09
0.00353601	1.34818e-09
0.00353903	1.34818e-09
0.00354205	1.34818e-09
0.00354508	1.34818e-09
0.0035481	1.34818e-09
0.00355113	1.34818e-09
0.00355416	1.34818e-09
0.0035572	1.34818e-09
0.00356024	1.34818e-09
0.00356328	1.34818e-09
0.00356632	1.34819e-09
0.00356936	1.34819e-09
0.00357241	1.34819e-09
0.00357546	1.34819e-09
0.00357851	1.34819e-09
0.00358157	1.34819e-09
0.00358462	1.34819e-09
0.00358769	1.34819e-09
0.00359075	1.34819e-09
0.00359381	1.34819e-09
0.00359688	1.34819e-09
0.00359995	1.34819e-09
0.00360303	1.34819e-09
0.0036061	1.34819e-09
0.00360918	1.34819e-09
0.00361226	1.34819e-09
0.00361535	1.34819e-09
0.00361843	1.34819e-09
0.00362152	1.34819e-09
0.00362461	1.34819e-09
0.00362771	1.34819e-09
0.00363081	1.34819e-09
0.00363391	1.34819e-09
0.00363701	1.34819e-09
0.00364011	1.34819e-09
0.00364322	1.34819e-09
0.00364633	1.34819e-09
0.00364944	1.34819e-09
0.00365256	1.34819e-09
0.00365568	1.34819e-09
0.0036588	1.34819e-09
0.00366192	1.34819e-09
0.00366505	1.34819e-09
0.00366818	1.34819e-09
0.00367131	1.34819e-09
0.00367444	1.34819e-09
0.00367758	1.34819e-09
0.00368072	1.34819e-09
0.00368386	1.34819e-09
0.00368701	1.34819e-09
0.00369016	1.34819e-09
0.00369331	1.34821e-09
0.00369646	1.34821e-09
0.00369962	1.34821e-09
0.00370277	1.34821e-09
0.00370593	1.34821e-09
0.0037091	1.34821e-09
0.00371227	1.34821e-09
0.00371543	1.34821e-09
0.00371861	1.34821e-09
0.00372178	1.34821e-09
0.00372496	1.34821e-09
0.00372814	1.34821e-09
0.00373132	1.34821e-09
0.00373451	1.34821e-09
0.0037377	1.34821e-09
0.00374089	1.34821e-09
0.00374408	1.34821e-09
0.00374728	1.34821e-09
0.00375048	1.34821e-09
0.00375368	1.34821e-09
0.00375688	1.34821e-09
0.00376009	1.34821e-09
0.0037633	1.34821e-09
0.00376651	1.34821e-09
0.00376973	1.34821e-09
0.00377295	1.34822e-09
0.00377617	1.34822e-09
0.00377939	1.34822e-09
0.00378262	1.34822e-09
0.00378585	1.34822e-09
0.00378908	1.34822e-09
0.00379232	1.34822e-09
0.00379555	1.34822e-09
0.00379879	1.34822e-09
0.00380204	1.34822e-09
0.00380528	1.34822e-09
0.00380853	1.34822e-09
0.00381178	1.34822e-09
0.00381504	1.34822e-09
0.00381829	1.34822e-09
0.00382155	1.34822e-09
0.00382482	1.34822e-09
0.00382808	1.34822e-09
0.00383135	1.34822e-09
0.00383462	1.34822e-09
0.0038379	1.34822e-09
0.00384117	1.34822e-09
0.00384445	1.34822e-09
0.00384773	1.34822e-09
0.00385102	1.34822e-09
0.00385431	1.34822e-09
0.0038576	1.34822e-09
0.00386089	1.34822e-09
0.00386419	1.34822e-09
0.00386749	1.34822e-09
0.00387079	1.34822e-09
0.00387409	1.34822e-09
0.0038774	1.34822e-09
0.00388071	1.34822e-09
0.00388402	1.34822e-09
0.00388734	1.34822e-09
0.00389066	1.34822e-09
0.00389398	1.34822e-09
0.0038973	1.34822e-09
0.00390063	1.34822e-09
0.00390396	1.34822e-09
0.00390729	1.34822e-09
0.00391063	1.34822e-09
0.00391397	1.34822e-09
0.00391731	1.34822e-09
0.00392065	1.34822e-09
0.003924	1.34822e-09
0.00392735	1.34823e-09
0.0039307	1.34823e-09
0.00393406	1.34823e-09
0.00393742	1.34823e-09
0.00394078	1.34823e-09
0.00394414	1.34824e-09
0.00394751	1.34824e-09
0.00395088	1.34824e-09
0.00395426	1.34824e-09
0.00395763	1.34824e-09
0.00396101	1.34824e-09
0.00396439	1.34824e-09
0.00396778	1.34824e-09
0.00397116	1.34824e-09
0.00397455	1.34824e-09
0.00397795	1.34824e-09
0.00398134	1.34824e-09
0.00398474	1.34824e-09
0.00398814	1.34824e-09
0.00399155	1.34824e-09
0.00399496	1.34824e-09
0.00399837	1.34824e-09
0.00400178	1.34824e-09
0.0040052	1.34824e-09
0.00400862	1.34824e-09
0.00401204	1.34824e-09
0.00401546	1.34824e-09
0.00401889	1.34824e-09
0.00402232	1.34824e-09
0.00402576	1.34824e-09
0.0040292	1.34825e-09
0.00403263	1.34825e-09
0.00403608	1.34825e-09
0.00403952	1.34825e-09
0.00404297	1.34825e-09
0.00404642	1.34825e-09
0.00404988	1.34825e-09
0.00405334	1.34825e-09
0.0040568	1.34825e-09
0.00406026	1.34825e-09
0.00406373	1.34825e-09
0.0040672	1.34825e-09
0.00407067	1.34825e-09
0.00407414	1.34825e-09
0.00407762	1.34825e-09
0.0040811	1.34825e-09
0.00408459	1.34825e-09
0.00408807	1.34825e-09
0.00409156	1.34825e-09
0.00409506	1.34825e-09
0.00409855	1.34825e-09
0.00410205	1.34825e-09
0.00410556	1.34825e-09
0.00410906	1.34825e-09
0.00411257	1.34825e-09
0.00411608	1.34825e-09
0.00411959	1.34825e-09
0.00412311	1.34825e-09
0.00412663	1.34825e-09
0.00413015	1.34825e-09
0.00413368	1.34825e-09
0.00413721	1.34825e-09
0.00414074	1.34825e-09
0.00414428	1.34825e-09
0.00414781	1.34825e-09
0.00415136	1.34825e-09
0.0041549	1.34825e-09
0.00415845	1.34825e-09
0.004162	1.34825e-09
0.00416555	1.34825e-09
0.00416911	1.34825e-09
0.00417267	1.34825e-09
0.00417623	1.34826e-09
0.00417979	1.34826e-09
0.00418336	1.34826e-09
0.00418693	1.34826e-09
0.00419051	1.34826e-09
0.00419409	1.34826e-09
0.00419767	1.34827e-09
0.00420125	1.34827e-09
0.00420484	1.34827e-09
0.00420843	1.34827e-09
0.00421202	1.34827e-09
0.00421562	1.34827e-09
0.00421921	1.34827e-09
0.00422282	1.34827e-09
0.00422642	1.34827e-09
0.00423003	1.34827e-09
0.00423364	1.34827e-09
0.00423726	1.34827e-09
0.00424087	1.34827e-09
0.00424449	1.34827e-09
0.00424812	1.34827e-09
0.00425174	1.34827e-09
0.00425537	1.34827e-09
0.00425901	1.34827e-09
0.00426264	1.34827e-09
0.00426628	1.34827e-09
0.00426993	1.34827e-09
0.00427357	1.34827e-09
0.00427722	1.34827e-09
0.00428087	1.34827e-09
0.00428453	1.34827e-09
0.00428818	1.34827e-09
0.00429184	1.34827e-09
0.00429551	1.34827e-09
0.00429918	1.34828e-09
0.00430285	1.34828e-09
0.00430652	1.34828e-09
0.0043102	1.34828e-09
0.00431388	1.34828e-09
0.00431756	1.34828e-09
0.00432125	1.34828e-09
0.00432493	1.34828e-09
0.00432863	1.34828e-09
0.00433232	1.34828e-09
0.00433602	1.34828e-09
0.00433972	1.34828e-09
0.00434343	1.34828e-09
0.00434714	1.34828e-09
0.00435085	1.34828e-09
0.00435456	1.34828e-09
0.00435828	1.34828e-09
0.004362	1.34828e-09
0.00436572	1.34828e-09
0.00436945	1.34828e-09
0.00437318	1.34828e-09
0.00437692	1.34828e-09
0.00438065	1.34828e-09
0.00438439	1.34828e-09
0.00438814	1.34828e-09
0.00439188	1.34828e-09
0.00439563	1.34828e-09
0.00439938	1.34828e-09
0.00440314	1.34828e-09
0.0044069	1.34829e-09
0.00441066	1.34829e-09
0.00441443	1.34829e-09
0.0044182	1.34829e-09
0.00442197	1.34829e-09
0.00442574	1.34829e-09
0.00442952	1.34829e-09
0.0044333	1.34829e-09
0.00443709	1.34829e-09
0.00444088	1.34829e-09
0.00444467	1.34829e-09
0.00444846	1.3483e-09
0.00445226	1.3483e-09
0.00445606	1.3483e-09
0.00445987	1.3483e-09
0.00446367	1.3483e-09
0.00446748	1.3483e-09
0.0044713	1.3483e-09
0.00447512	1.3483e-09
0.00447894	1.3483e-09
0.00448276	1.3483e-09
0.00448659	1.3483e-09
0.00449042	1.3483e-09
0.00449425	1.3483e-09
0.00449809	1.3483e-09
0.00450193	1.3483e-09
0.00450577	1.3483e-09
0.00450962	1.34831e-09
0.00451347	1.34831e-09
0.00451732	1.34831e-09
0.00452118	1.34831e-09
0.00452504	1.34831e-09
0.0045289	1.34831e-09
0.00453277	1.34831e-09
0.00453664	1.34831e-09
0.00454051	1.34831e-09
0.00454439	1.34831e-09
0.00454827	1.34831e-09
0.00455215	1.34831e-09
0.00455604	1.34831e-09
0.00455993	1.34831e-09
0.00456382	1.34831e-09
0.00456772	1.34831e-09
0.00457162	1.34831e-09
0.00457552	1.34831e-09
0.00457942	1.34831e-09
0.00458333	1.34831e-09
0.00458725	1.34831e-09
0.00459116	1.34831e-09
0.00459508	1.34831e-09
0.00459901	1.34831e-09
0.00460293	1.34831e-09
0.00460686	1.34831e-09
0.0046108	1.34831e-09
0.00461473	1.34831e-09
0.00461867	1.34831e-09
0.00462261	1.34831e-09
0.00462656	1.34831e-09
0.00463051	1.34831e-09
0.00463446	1.34831e-09
0.00463842	1.34831e-09
0.00464238	1.34831e-09
0.00464634	1.34831e-09
0.00465031	1.34832e-09
0.00465428	1.34832e-09
0.00465826	1.34832e-09
0.00466223	1.34832e-09
0.00466621	1.34832e-09
0.0046702	1.34833e-09
0.00467418	1.34833e-09
0.00467817	1.34833e-09
0.00468217	1.34833e-09
0.00468617	1.34833e-09
0.00469017	1.34833e-09
0.00469417	1.34833e-09
0.00469818	1.34833e-09
0.00470219	1.34833e-09
0.0047062	1.34833e-09
0.00471022	1.34833e-09
0.00471424	1.34833e-09
0.00471827	1.34833e-09
0.0047223	1.34833e-09
0.00472633	1.34833e-09
0.00473036	1.34833e-09
0.0047344	1.34833e-09
0.00473844	1.34833e-09
0.00474249	1.34833e-09
0.00474654	1.34833e-09
0.00475059	1.34833e-09
0.00475464	1.34833e-09
0.0047587	1.34834e-09
0.00476277	1.34834e-09
0.00476683	1.34834e-09
0.0047709	1.34834e-09
0.00477498	1.34834e-09
0.00477905	1.34834e-09
0.00478313	1.34834e-09
0.00478722	1.34834e-09
0.0047913	1.34834e-09
0.00479539	1.34834e-09
0.00479949	1.34834e-09
0.00480359	1.34834e-09
0.00480769	1.34834e-09
0.00481179	1.34834e-09
0.0048159	1.34834e-09
0.00482001	1.34834e-09
0.00482413	1.34834e-09
0.00482824	1.34834e-09
0.00483237	1.34834e-09
0.00483649	1.34834e-09
0.00484062	1.34834e-09
0.00484475	1.34834e-09
0.00484889	1.34834e-09
0.00485303	1.34834e-09
0.00485717	1.34834e-09
0.00486132	1.34834e-09
0.00486547	1.34834e-09
0.00486962	1.34835e-09
0.00487378	1.34835e-09
0.00487794	1.34835e-09
0.00488211	1.34835e-09
0.00488627	1.34835e-09
0.00489045	1.34835e-09
0.00489462	1.34835e-09
0.0048988	1.34835e-09
0.00490298	1.34835e-09
0.00490717	1.34835e-09
0.00491136	1.34835e-09
0.00491555	1.34835e-09
0.00491975	1.34835e-09
0.00492395	1.34836e-09
0.00492815	1.34836e-09
0.00493236	1.34836e-09
0.00493657	1.34836e-09
0.00494078	1.34836e-09
0.004945	1.34836e-09
0.00494922	1.34836e-09
0.00495345	1.34836e-09
0.00495768	1.34836e-09
0.00496191	1.34836e-09
0.00496615	1.34836e-09
0.00497039	1.34836e-09
0.00497463	1.34836e-09
0.00497888	1.34836e-09
0.00498313	1.34836e-09
0.00498738	1.34836e-09
0.00499164	1.34836e-09
0.0049959	1.34836e-09
0.00500017	1.34836e-09
0.00500444	1.34836e-09
0.00500871	1.34837e-09
0.00501298	1.34837e-09
0.00501726	1.34837e-09
0.00502155	1.34836e-09
0.00502583	1.34836e-09
0.00503013	1.34837e-09
0.00503442	1.34837e-09
0.00503872	1.34837e-09
0.00504302	1.34837e-09
0.00504733	1.34837e-09
0.00505163	1.34837e-09
0.00505595	1.34837e-09
0.00506026	1.34837e-09
0.00506458	1.34837e-09
0.00506891	1.34837e-09
0.00507324	1.34837e-09
0.00507757	1.34837e-09
0.0050819	1.34837e-09
0.00508624	1.34837e-09
0.00509058	1.34837e-09
0.00509493	1.34837e-09
0.00509928	1.34837e-09
0.00510363	1.34837e-09
0.00510799	1.34837e-09
0.00511235	1.34837e-09
0.00511671	1.34837e-09
0.00512108	1.34837e-09
0.00512545	1.34837e-09
0.00512983	1.34837e-09
0.00513421	1.34837e-09
0.00513859	1.34838e-09
0.00514298	1.34838e-09
0.00514737	1.34838e-09
0.00515177	1.34838e-09
0.00515616	1.34838e-09
0.00516057	1.34838e-09
0.00516497	1.34838e-09
0.00516938	1.34838e-09
0.00517379	1.34838e-09
0.00517821	1.34839e-09
0.00518263	1.34839e-09
0.00518706	1.34839e-09
0.00519149	1.34839e-09
0.00519592	1.34839e-09
0.00520035	1.34839e-09
0.00520479	1.34839e-09
0.00520924	1.34839e-09
0.00521368	1.34839e-09
0.00521814	1.34839e-09
0.00522259	1.34839e-09
0.00522705	1.34839e-09
0.00523151	1.34839e-09
0.00523598	1.34839e-09
0.00524045	1.34839e-09
0.00524492	1.34839e-09
0.0052494	1.34839e-09
0.00525388	1.34839e-09
0.00525837	1.34839e-09
0.00526286	1.34839e-09
0.00526735	1.34839e-09
0.00527185	1.34839e-09
0.00527635	1.34839e-09
0.00528085	1.34839e-09
0.00528536	1.3484e-09
0.00528987	1.3484e-09
0.00529439	1.3484e-09
0.00529891	1.3484e-09
0.00530343	1.3484e-09
0.00530796	1.3484e-09
0.00531249	1.3484e-09
0.00531703	1.3484e-09
0.00532157	1.3484e-09
0.00532611	1.3484e-09
0.00533066	1.3484e-09
0.00533521	1.3484e-09
0.00533976	1.3484e-09
0.00534432	1.3484e-09
0.00534889	1.3484e-09
0.00535345	1.3484e-09
0.00535802	1.3484e-09
0.0053626	1.3484e-09
0.00536718	1.3484e-09
0.00537176	1.3484e-09
0.00537634	1.3484e-09
0.00538093	1.34841e-09
0.00538553	1.34841e-09
0.00539013	1.34842e-09
0.00539473	1.34842e-09
0.00539933	1.34842e-09
0.00540394	1.34842e-09
0.00540856	1.34842e-09
0.00541317	1.34842e-09
0.00541779	1.34842e-09
0.00542242	1.34842e-09
0.00542705	1.34842e-09
0.00543168	1.34842e-09
0.00543632	1.34842e-09
0.00544096	1.34842e-09
0.00544561	1.34842e-09
0.00545026	1.34842e-09
0.00545491	1.34842e-09
0.00545957	1.34842e-09
0.00546423	1.34842e-09
0.00546889	1.34842e-09
0.00547356	1.34842e-09
0.00547823	1.34843e-09
0.00548291	1.34843e-09
0.00548759	1.34843e-09
0.00549228	1.34843e-09
0.00549697	1.34843e-09
0.00550166	1.34843e-09
0.00550636	1.34843e-09
[truncated: 70,630 more rows]

## Sheet: d
Time (s)	d_p (m)
0.00100257	1.34792e-09
0.00100514	1.34792e-09
0.00100772	1.34792e-09
0.00101031	1.34792e-09
0.0010129	1.34792e-09
0.0010155	1.34792e-09
0.00101811	1.34792e-09
0.00102072	1.34792e-09
0.00102334	1.34792e-09
0.00102597	1.34792e-09
0.0010286	1.34792e-09
0.00103124	1.34792e-09
0.00103389	1.34792e-09
0.00103654	1.34792e-09
0.0010392	1.34792e-09
0.00104187	1.34792e-09
0.00104454	1.34792e-09
0.00104723	1.34792e-09
0.00104991	1.34792e-09
0.00105261	1.34792e-09
0.00105531	1.34792e-09
0.00105802	1.34792e-09
0.00106073	1.34792e-09
0.00106346	1.34792e-09
0.00106619	1.34792e-09
0.00106892	1.34792e-09
0.00107167	1.34792e-09
0.00107442	1.34792e-09
0.00107718	1.34792e-09
0.00107994	1.34792e-09
0.00108271	1.34792e-09
0.00108549	1.34792e-09
0.00108828	1.34792e-09
0.00109107	1.34792e-09
0.00109387	1.34792e-09
0.00109668	1.34792e-09
0.0010995	1.34792e-09
0.00110232	1.34792e-09
0.00110515	1.34792e-09
0.00110798	1.34792e-09
0.00111083	1.34792e-09
0.00111368	1.34792e-09
0.00111654	1.34792e-09
0.0011194	1.34792e-09
0.00112228	1.34792e-09
0.00112516	1.34792e-09
0.00112805	1.34792e-09
0.00113094	1.34792e-09
0.00113384	1.34792e-09
0.00113676	1.34792e-09
0.00113967	1.34792e-09
0.0011426	1.34792e-09
0.00114553	1.34792e-09
0.00114847	1.34792e-09
0.00115142	1.34792e-09
0.00115438	1.34792e-09
0.00115734	1.34792e-09
0.00116031	1.34792e-09
0.00116329	1.34792e-09
0.00116627	1.34792e-09
0.00116927	1.34792e-09
0.00117227	1.34792e-09
0.00117528	1.34792e-09
0.00117829	1.34792e-09
0.00118132	1.34792e-09
0.00118435	1.34792e-09
0.00118739	1.34792e-09
0.00119044	1.34792e-09
0.00119349	1.34792e-09
0.00119656	1.34793e-09
0.00119963	1.34793e-09
0.00120271	1.34793e-09
0.0012058	1.34793e-09
0.00120889	1.34793e-09
0.00121199	1.34793e-09
0.0012151	1.34793e-09
0.00121822	1.34793e-09
0.00122135	1.34793e-09
0.00122449	1.34793e-09
0.00122763	1.34793e-09
0.00123078	1.34793e-09
0.00123394	1.34793e-09
0.00123711	1.34793e-09
0.00124028	1.34793e-09
0.00124347	1.34794e-09
0.00124666	1.34794e-09
0.00124986	1.34794e-09
0.00125307	1.34794e-09
0.00125628	1.34794e-09
0.00125951	1.34794e-09
0.00126274	1.34794e-09
0.00126598	1.34794e-09
0.00126923	1.34794e-09
0.00127249	1.34794e-09
0.00127575	1.34794e-09
0.00127903	1.34794e-09
0.00128231	1.34794e-09
0.0012856	1.34794e-09
0.0012889	1.34794e-09
0.00129221	1.34794e-09
0.00129553	1.34794e-09
0.00129885	1.34794e-09
0.00130219	1.34794e-09
0.00130553	1.34794e-09
0.00130888	1.34794e-09
0.00131224	1.34794e-09
0.00131561	1.34794e-09
0.00131899	1.34794e-09
0.00132237	1.34794e-09
0.00132577	1.34794e-09
0.00132917	1.34794e-09
0.00133258	1.34794e-09
0.001336	1.34794e-09
0.00133943	1.34794e-09
0.00134287	1.34794e-09
0.00134632	1.34794e-09
0.00134977	1.34794e-09
0.00135324	1.34794e-09
0.00135671	1.34794e-09
0.00136019	1.34794e-09
0.00136368	1.34794e-09
0.00136718	1.34794e-09
0.00137069	1.34794e-09
0.00137421	1.34794e-09
0.00137774	1.34794e-09
0.00138128	1.34794e-09
0.00138482	1.34794e-09
0.00138838	1.34794e-09
0.00139194	1.34794e-09
0.00139551	1.34794e-09
0.0013991	1.34794e-09
0.00140269	1.34794e-09
0.00140629	1.34794e-09
0.0014099	1.34794e-09
0.00141352	1.34794e-09
0.00141714	1.34794e-09
0.00142078	1.34794e-09
0.00142443	1.34794e-09
0.00142808	1.34794e-09
0.00143175	1.34794e-09
0.00143543	1.34794e-09
0.00143911	1.34794e-09
0.0014428	1.34794e-09
0.00144651	1.34794e-09
0.00145022	1.34794e-09
0.00145394	1.34794e-09
0.00145767	1.34794e-09
0.00146142	1.34794e-09
0.00146517	1.34794e-09
0.00146893	1.34794e-09
0.0014727	1.34794e-09
0.00147648	1.34794e-09
0.00148027	1.34794e-09
0.00148407	1.34794e-09
0.00148788	1.34794e-09
0.0014917	1.34794e-09
0.00149553	1.34794e-09
0.00149937	1.34794e-09
0.00150321	1.34794e-09
0.00150707	1.34794e-09
0.00151094	1.34794e-09
0.00151482	1.34794e-09
0.00151871	1.34794e-09
0.00152261	1.34794e-09
0.00152651	1.34794e-09
0.00153043	1.34794e-09
0.00153436	1.34794e-09
0.0015383	1.34794e-09
0.00154225	1.34794e-09
0.00154621	1.34794e-09
0.00155018	1.34794e-09
0.00155415	1.34794e-09
0.00155814	1.34794e-09
0.00156214	1.34794e-09
0.00156615	1.34794e-09
0.00157017	1.34794e-09
0.0015742	1.34794e-09
0.00157824	1.34794e-09
0.0015823	1.34794e-09
0.00158636	1.34794e-09
0.00159043	1.34794e-09
0.00159451	1.34794e-09
0.0015986	1.34794e-09
0.00160271	1.34794e-09
0.00160682	1.34794e-09
0.00161095	1.34794e-09
0.00161508	1.34794e-09
0.00161923	1.34794e-09
0.00162338	1.34794e-09
0.00162755	1.34795e-09
0.00163173	1.34795e-09
0.00163592	1.34795e-09
0.00164011	1.34795e-09
0.00164432	1.34795e-09
0.00164855	1.34795e-09
0.00165278	1.34795e-09
0.00165702	1.34795e-09
0.00166127	1.34795e-09
0.00166554	1.34795e-09
0.00166981	1.34795e-09
0.0016741	1.34795e-09
0.0016784	1.34795e-09
0.0016827	1.34795e-09
0.00168702	1.34795e-09
0.00169135	1.34795e-09
0.00169569	1.34795e-09
0.00170005	1.34795e-09
0.00170441	1.34795e-09
0.00170879	1.34795e-09
0.00171317	1.34795e-09
0.00171757	1.34795e-09
0.00172198	1.34795e-09
0.0017264	1.34795e-09
0.00173083	1.34795e-09
0.00173527	1.34795e-09
0.00173973	1.34795e-09
0.00174419	1.34795e-09
0.00174867	1.34795e-09
0.00175316	1.34795e-09
0.00175766	1.34795e-09
0.00176217	1.34795e-09
0.00176669	1.34795e-09
0.00177123	1.34795e-09
0.00177577	1.34795e-09
0.00178033	1.34795e-09
0.0017849	1.34795e-09
0.00178948	1.34795e-09
0.00179408	1.34795e-09
0.00179868	1.34795e-09
0.0018033	1.34795e-09
0.00180793	1.34795e-09
0.00181257	1.34795e-09
0.00181722	1.34795e-09
0.00182189	1.34795e-09
0.00182656	1.34795e-09
0.00183125	1.34795e-09
0.00183595	1.34795e-09
0.00184066	1.34795e-09
0.00184539	1.34795e-09
0.00185012	1.34795e-09
0.00185487	1.34795e-09
0.00185964	1.34795e-09
0.00186441	1.34795e-09
0.00186919	1.34795e-09
0.00187399	1.34795e-09
0.0018788	1.34795e-09
0.00188362	1.34795e-09
0.00188846	1.34795e-09
0.00189331	1.34795e-09
0.00189817	1.34795e-09
0.00190304	1.34795e-09
0.00190792	1.34795e-09
0.00191282	1.34795e-09
0.00191773	1.34795e-09
0.00192265	1.34795e-09
0.00192759	1.34795e-09
0.00193254	1.34795e-09
0.0019375	1.34795e-09
0.00194247	1.34795e-09
0.00194746	1.34795e-09
0.00195246	1.34795e-09
0.00195747	1.34795e-09
0.00196249	1.34795e-09
0.00196753	1.34795e-09
0.00197258	1.34795e-09
0.00197764	1.34795e-09
0.00198272	1.34795e-09
0.00198781	1.34795e-09
0.00199291	1.34795e-09
0.00199803	1.34795e-09
0.00200315	1.34795e-09
0.0020083	1.34795e-09
0.00201345	1.34795e-09
0.00201862	1.34795e-09
0.0020238	1.34795e-09
0.002029	1.34795e-09
0.0020342	1.34795e-09
0.00203943	1.34795e-09
0.00204466	1.34795e-09
0.00204991	1.34795e-09
0.00205517	1.34795e-09
0.00206045	1.34795e-09
0.00206573	1.34795e-09
0.00207104	1.34795e-09
0.00207635	1.34795e-09
0.00208168	1.34795e-09
0.00208703	1.34795e-09
0.00209238	1.34795e-09
0.00209775	1.34795e-09
0.00210314	1.34795e-09
0.00210854	1.34795e-09
0.00211395	1.34795e-09
0.00211938	1.34795e-09
0.00212482	1.34795e-09
0.00213027	1.34795e-09
0.00213574	1.34795e-09
0.00214122	1.34795e-09
0.00214672	1.34795e-09
0.00215223	1.34795e-09
0.00215775	1.34795e-09
0.00216329	1.34795e-09
0.00216884	1.34795e-09
0.00217441	1.34795e-09
0.00217999	1.34795e-09
0.00218559	1.34795e-09
0.0021912	1.34795e-09
0.00219682	1.34795e-09
0.00220246	1.34795e-09
0.00220811	1.34795e-09
0.00221378	1.34795e-09
0.00221946	1.34795e-09
0.00222516	1.34795e-09
0.00223087	1.34795e-09
0.0022366	1.34795e-09
0.00224234	1.34795e-09
0.0022481	1.34795e-09
0.00225387	1.34795e-09
0.00225965	1.34795e-09
0.00226545	1.34795e-09
0.00227127	1.34795e-09
0.0022771	1.34795e-09
0.00228294	1.34795e-09
0.0022888	1.34795e-09
0.00229468	1.34795e-09
0.00230057	1.34795e-09
0.00230647	1.34795e-09
0.00231239	1.34795e-09
0.00231833	1.34795e-09
0.00232428	1.34795e-09
0.00233024	1.34795e-09
0.00233623	1.34795e-09
0.00234222	1.34795e-09
0.00234823	1.34795e-09
0.00235426	1.34796e-09
0.00236031	1.34796e-09
0.00236636	1.34796e-09
0.00237244	1.34796e-09
0.00237853	1.34796e-09
0.00238463	1.34796e-09
0.00239075	1.34796e-09
0.00239689	1.34796e-09
0.00240304	1.34796e-09
0.00240921	1.34796e-09
0.0024154	1.34796e-09
0.0024216	1.34796e-09
0.00242781	1.34797e-09
0.00243404	1.34797e-09
0.00244029	1.34797e-09
0.00244655	1.34797e-09
0.00245283	1.34797e-09
0.00245913	1.34797e-09
0.00246544	1.34797e-09
0.00247177	1.34797e-09
0.00247812	1.34797e-09
0.00248448	1.34797e-09
0.00249085	1.34797e-09
0.00249725	1.34797e-09
0.00250366	1.34797e-09
0.00251008	1.34797e-09
0.00251653	1.34797e-09
0.00252299	1.34797e-09
0.00252946	1.34797e-09
0.00253596	1.34797e-09
0.00254246	1.34797e-09
0.00254899	1.34797e-09
0.00255553	1.34797e-09
0.00256209	1.34797e-09
0.00256867	1.34797e-09
0.00257526	1.34797e-09
0.00258187	1.34797e-09
0.0025885	1.34797e-09
0.00259515	1.34797e-09
0.00260181	1.34797e-09
0.00260848	1.34797e-09
0.00261518	1.34797e-09
0.00262189	1.34797e-09
0.00262862	1.34797e-09
0.00263537	1.34797e-09
0.00264214	1.34797e-09
0.00264892	1.34797e-09
0.00265572	1.34797e-09
0.00266253	1.34797e-09
0.00266937	1.34797e-09
0.00267622	1.34797e-09
0.00268309	1.34797e-09
0.00268998	1.34797e-09
0.00269688	1.34797e-09
0.0027038	1.34797e-09
0.00271074	1.34797e-09
0.0027177	1.34797e-09
0.00272468	1.34797e-09
0.00273167	1.34797e-09
0.00273868	1.34797e-09
0.00274571	1.34797e-09
0.00275276	1.34797e-09
0.00275983	1.34797e-09
0.00276691	1.34797e-09
0.00277401	1.34797e-09
0.00278113	1.34797e-09
0.00278827	1.34797e-09
0.00279543	1.34798e-09
0.0028026	1.34798e-09
0.0028098	1.34798e-09
0.00281701	1.34798e-09
0.00282424	1.34798e-09
0.00283149	1.34798e-09
0.00283876	1.34798e-09
0.00284605	1.34798e-09
0.00285335	1.34798e-09
0.00286067	1.34798e-09
0.00286802	1.34798e-09
0.00287538	1.34798e-09
0.00288276	1.34798e-09
0.00289016	1.34798e-09
0.00289758	1.34798e-09
0.00290502	1.34798e-09
0.00291247	1.34798e-09
0.00291995	1.34798e-09
0.00292744	1.34798e-09
0.00293496	1.34798e-09
0.00294249	1.34798e-09
0.00295004	1.34798e-09
0.00295762	1.34798e-09
0.00296521	1.34798e-09
0.00297282	1.34798e-09
0.00298045	1.34798e-09
0.0029881	1.34798e-09
0.00299577	1.34798e-09
0.00300346	1.34798e-09
0.00301117	1.34798e-09
0.0030189	1.34798e-09
0.00302665	1.34798e-09
0.00303442	1.34798e-09
0.00304221	1.34798e-09
0.00305001	1.34798e-09
0.00305784	1.34798e-09
0.00306569	1.34798e-09
0.00307356	1.34798e-09
0.00308145	1.34798e-09
0.00308936	1.34798e-09
0.00309729	1.34798e-09
0.00310524	1.34798e-09
0.00311321	1.34798e-09
0.0031212	1.34798e-09
0.00312921	1.34798e-09
0.00313725	1.34798e-09
0.0031453	1.34798e-09
0.00315337	1.34798e-09
0.00316147	1.34798e-09
0.00316958	1.34798e-09
0.00317772	1.34798e-09
0.00318587	1.34798e-09
0.00319405	1.34798e-09
0.00320225	1.34798e-09
0.00321047	1.34798e-09
0.00321871	1.34798e-09
0.00322697	1.34798e-09
0.00323526	1.34798e-09
0.00324356	1.34798e-09
0.00325189	1.34798e-09
0.00326023	1.34798e-09
0.0032686	1.34798e-09
0.00327699	1.34798e-09
0.0032854	1.34798e-09
0.00329384	1.34798e-09
0.00330229	1.34798e-09
0.00331077	1.34798e-09
0.00331927	1.34798e-09
0.00332779	1.34798e-09
0.00333633	1.34798e-09
0.00334489	1.34798e-09
0.00335348	1.34798e-09
0.00336209	1.34798e-09
0.00337072	1.34798e-09
0.00337937	1.34798e-09
0.00338804	1.34798e-09
0.00339674	1.34798e-09
0.00340546	1.34798e-09
0.0034142	1.34798e-09
0.00342296	1.34798e-09
0.00343175	1.34798e-09
0.00344056	1.34798e-09
0.00344939	1.34798e-09
0.00345824	1.34798e-09
0.00346712	1.34798e-09
0.00347602	1.34798e-09
0.00348494	1.34799e-09
0.00349389	1.34799e-09
0.00350286	1.34799e-09
0.00351185	1.34799e-09
0.00352086	1.34799e-09
0.0035299	1.34799e-09
0.00353896	1.34799e-09
0.00354804	1.34799e-09
0.00355715	1.34799e-09
0.00356628	1.34799e-09
0.00357543	1.34799e-09
0.00358461	1.34799e-09
0.00359381	1.34799e-09
0.00360304	1.34799e-09
0.00361229	1.34799e-09
0.00362156	1.348e-09
0.00363086	1.348e-09
0.00364017	1.348e-09
0.00364952	1.348e-09
0.00365889	1.348e-09
0.00366828	1.348e-09
0.00367769	1.348e-09
0.00368713	1.348e-09
0.0036966	1.348e-09
0.00370609	1.348e-09
0.0037156	1.348e-09
0.00372514	1.348e-09
0.0037347	1.348e-09
0.00374429	1.348e-09
0.0037539	1.348e-09
0.00376353	1.348e-09
0.00377319	1.348e-09
0.00378288	1.348e-09
0.00379259	1.348e-09
0.00380232	1.348e-09
0.00381208	1.348e-09
0.00382187	1.348e-09
0.00383168	1.348e-09
0.00384151	1.348e-09
0.00385137	1.348e-09
0.00386126	1.348e-09
0.00387117	1.348e-09
0.00388111	1.348e-09
0.00389107	1.348e-09
0.00390106	1.348e-09
0.00391107	1.348e-09
0.00392111	1.348e-09
0.00393118	1.348e-09
0.00394127	1.348e-09
0.00395138	1.348e-09
0.00396152	1.348e-09
0.00397169	1.348e-09
0.00398189	1.348e-09
0.00399211	1.348e-09
0.00400236	1.348e-09
0.00401263	1.348e-09
0.00402293	1.34801e-09
0.00403326	1.34801e-09
0.00404361	1.34801e-09
0.00405399	1.34801e-09
0.00406439	1.34801e-09
0.00407483	1.34801e-09
0.00408529	1.34801e-09
0.00409577	1.34801e-09
0.00410629	1.34801e-09
0.00411683	1.34801e-09
0.00412739	1.34801e-09
0.00413799	1.34801e-09
0.00414861	1.34801e-09
0.00415926	1.34801e-09
0.00416993	1.34801e-09
0.00418064	1.34801e-09
0.00419137	1.34801e-09
0.00420213	1.34801e-09
0.00421291	1.34801e-09
0.00422373	1.34801e-09
0.00423457	1.34801e-09
0.00424544	1.34801e-09
0.00425634	1.34801e-09
0.00426726	1.34801e-09
0.00427821	1.34801e-09
0.0042892	1.34801e-09
0.00430021	1.34801e-09
0.00431124	1.34801e-09
0.00432231	1.34801e-09
0.0043334	1.34801e-09
0.00434453	1.34801e-09
0.00435568	1.34801e-09
0.00436686	1.34801e-09
0.00437807	1.34801e-09
0.00438931	1.34801e-09
0.00440057	1.34801e-09
0.00441187	1.34801e-09
0.00442319	1.34801e-09
0.00443455	1.34801e-09
0.00444593	1.34801e-09
0.00445734	1.34801e-09
0.00446878	1.34801e-09
0.00448025	1.34801e-09
0.00449175	1.34801e-09
0.00450328	1.34801e-09
0.00451484	1.34801e-09
0.00452643	1.34801e-09
0.00453805	1.34801e-09
0.0045497	1.34801e-09
0.00456138	1.34801e-09
0.00457309	1.34801e-09
0.00458482	1.34801e-09
0.00459659	1.34802e-09
0.00460839	1.34802e-09
0.00462022	1.34802e-09
0.00463208	1.34802e-09
0.00464397	1.34802e-09
0.00465589	1.34802e-09
0.00466784	1.34802e-09
0.00467982	1.34802e-09
0.00469183	1.34802e-09
0.00470388	1.34803e-09
0.00471595	1.34803e-09
0.00472806	1.34803e-09
0.00474019	1.34803e-09
0.00475236	1.34803e-09
0.00476456	1.34803e-09
0.00477679	1.34803e-09
0.00478905	1.34803e-09
0.00480134	1.34803e-09
0.00481367	1.34803e-09
0.00482602	1.34803e-09
0.00483841	1.34803e-09
0.00485083	1.34803e-09
0.00486328	1.34803e-09
0.00487576	1.34803e-09
0.00488828	1.34803e-09
0.00490083	1.34803e-09
0.00491341	1.34803e-09
0.00492602	1.34803e-09
0.00493866	1.34803e-09
0.00495134	1.34803e-09
0.00496405	1.34803e-09
0.00497679	1.34803e-09
0.00498957	1.34803e-09
0.00500237	1.34803e-09
0.00501521	1.34803e-09
0.00502809	1.34803e-09
0.00504099	1.34804e-09
0.00505393	1.34804e-09
0.00506691	1.34804e-09
0.00507991	1.34804e-09
0.00509295	1.34804e-09
0.00510602	1.34804e-09
0.00511913	1.34804e-09
0.00513227	1.34804e-09
0.00514544	1.34804e-09
0.00515865	1.34804e-09
0.00517189	1.34804e-09
0.00518517	1.34804e-09
0.00519848	1.34804e-09
0.00521182	1.34804e-09
0.0052252	1.34804e-09
0.00523861	1.34804e-09
0.00525206	1.34804e-09
0.00526554	1.34804e-09
0.00527906	1.34804e-09
0.00529261	1.34804e-09
0.00530619	1.34804e-09
0.00531981	1.34804e-09
0.00533347	1.34804e-09
0.00534716	1.34804e-09
0.00536088	1.34804e-09
0.00537464	1.34804e-09
0.00538844	1.34804e-09
0.00540227	1.34804e-09
0.00541614	1.34804e-09
0.00543004	1.34804e-09
0.00544398	1.34804e-09
0.00545795	1.34804e-09
0.00547196	1.34804e-09
0.00548601	1.34804e-09
0.00550009	1.34804e-09
0.00551421	1.34804e-09
0.00552836	1.34804e-09
0.00554255	1.34804e-09
0.00555678	1.34804e-09
0.00557104	1.34804e-09
0.00558534	1.34804e-09
0.00559968	1.34804e-09
0.00561405	1.34804e-09
0.00562846	1.34804e-09
0.00564291	1.34804e-09
0.00565739	1.34804e-09
0.00567191	1.34804e-09
0.00568647	1.34804e-09
0.00570107	1.34804e-09
0.0057157	1.34804e-09
0.00573037	1.34804e-09
0.00574508	1.34805e-09
0.00575983	1.34805e-09
0.00577462	1.34805e-09
0.00578944	1.34805e-09
0.0058043	1.34805e-09
0.0058192	1.34806e-09
0.00583413	1.34806e-09
0.00584911	1.34806e-09
0.00586412	1.34806e-09
0.00587918	1.34806e-09
0.00589427	1.34806e-09
0.0059094	1.34806e-09
0.00592456	1.34806e-09
0.00593977	1.34806e-09
0.00595502	1.34806e-09
0.0059703	1.34806e-09
0.00598563	1.34806e-09
0.00600099	1.34806e-09
0.0060164	1.34806e-09
0.00603184	1.34806e-09
0.00604732	1.34806e-09
0.00606284	1.34806e-09
0.00607841	1.34806e-09
0.00609401	1.34806e-09
0.00610965	1.34806e-09
0.00612533	1.34806e-09
0.00614106	1.34806e-09
0.00615682	1.34806e-09
0.00617262	1.34806e-09
0.00618847	1.34806e-09
0.00620435	1.34806e-09
0.00622028	1.34807e-09
0.00623625	1.34807e-09
0.00625225	1.34807e-09
0.0062683	1.34807e-09
0.00628439	1.34807e-09
0.00630052	1.34807e-09
0.00631669	1.34807e-09
0.00633291	1.34807e-09
0.00634916	1.34807e-09
0.00636546	1.34807e-09
0.0063818	1.34807e-09
0.00639818	1.34807e-09
0.0064146	1.34807e-09
0.00643107	1.34807e-09
0.00644758	1.34807e-09
0.00646413	1.34807e-09
0.00648072	1.34807e-09
0.00649735	1.34807e-09
0.00651403	1.34807e-09
0.00653075	1.34807e-09
0.00654752	1.34807e-09
0.00656432	1.34807e-09
0.00658117	1.34807e-09
0.00659807	1.34807e-09
0.006615	1.34807e-09
0.00663198	1.34807e-09
0.006649	1.34807e-09
0.00666607	1.34807e-09
0.00668318	1.34807e-09
0.00670034	1.34807e-09
0.00671754	1.34807e-09
0.00673478	1.34807e-09
0.00675207	1.34807e-09
0.0067694	1.34807e-09
0.00678677	1.34807e-09
0.00680419	1.34807e-09
0.00682166	1.34807e-09
0.00683917	1.34807e-09
0.00685672	1.34807e-09
0.00687432	1.34807e-09
0.00689197	1.34807e-09
0.00690966	1.34807e-09
0.0069274	1.34807e-09
0.00694518	1.34807e-09
0.006963	1.34808e-09
0.00698088	1.34808e-09
0.0069988	1.34808e-09
0.00701676	1.34808e-09
0.00703477	1.34809e-09
0.00705283	1.34809e-09
0.00707093	1.34809e-09
0.00708908	1.34809e-09
0.00710728	1.34809e-09
0.00712552	1.34809e-09
0.00714381	1.34809e-09
0.00716215	1.34809e-09
0.00718053	1.34809e-09
0.00719897	1.34809e-09
0.00721744	1.34809e-09
0.00723597	1.34809e-09
0.00725454	1.34809e-09
0.00727317	1.34809e-09
0.00729183	1.34809e-09
0.00731055	1.34809e-09
0.00732932	1.34809e-09
0.00734813	1.34809e-09
0.00736699	1.34809e-09
0.0073859	1.34809e-09
0.00740486	1.34809e-09
0.00742387	1.34809e-09
0.00744292	1.34809e-09
0.00746203	1.3481e-09
0.00748118	1.3481e-09
0.00750038	1.3481e-09
0.00751964	1.3481e-09
0.00753894	1.3481e-09
0.00755829	1.3481e-09
0.00757769	1.3481e-09
0.00759714	1.3481e-09
0.00761664	1.3481e-09
0.00763619	1.3481e-09
0.00765579	1.3481e-09
0.00767544	1.3481e-09
0.00769515	1.3481e-09
0.0077149	1.3481e-09
0.0077347	1.3481e-09
0.00775456	1.3481e-09
0.00777446	1.3481e-09
0.00779442	1.3481e-09
0.00781442	1.3481e-09
0.00783448	1.3481e-09
0.00785459	1.3481e-09
0.00787475	1.3481e-09
0.00789497	1.3481e-09
0.00791523	1.3481e-09
0.00793555	1.3481e-09
0.00795592	1.3481e-09
0.00797634	1.3481e-09
0.00799681	1.34811e-09
0.00801734	1.34811e-09
0.00803792	1.34811e-09
0.00805855	1.34811e-09
0.00807924	1.34811e-09
0.00809997	1.34811e-09
0.00812077	1.34811e-09
0.00814161	1.34811e-09
0.00816251	1.34811e-09
0.00818346	1.34811e-09
0.00820447	1.34811e-09
0.00822553	1.34812e-09
0.00824664	1.34812e-09
0.00826781	1.34812e-09
0.00828903	1.34812e-09
0.00831031	1.34812e-09
0.00833164	1.34812e-09
0.00835302	1.34812e-09
0.00837446	1.34812e-09
0.00839596	1.34812e-09
0.00841751	1.34812e-09
0.00843912	1.34812e-09
0.00846078	1.34812e-09
0.0084825	1.34812e-09
0.00850427	1.34812e-09
0.0085261	1.34812e-09
0.00854798	1.34812e-09
0.00856993	1.34812e-09
0.00859192	1.34812e-09
0.00861398	1.34812e-09
0.00863609	1.34812e-09
0.00865826	1.34813e-09
0.00868048	1.34813e-09
0.00870276	1.34813e-09
0.0087251	1.34813e-09
0.0087475	1.34813e-09
0.00876995	1.34813e-09
0.00879246	1.34813e-09
0.00881503	1.34813e-09
0.00883766	1.34813e-09
0.00886034	1.34813e-09
0.00888308	1.34813e-09
0.00890589	1.34813e-09
0.00892875	1.34813e-09
0.00895166	1.34813e-09
0.00897464	1.34813e-09
0.00899768	1.34813e-09
0.00902077	1.34813e-09
0.00904393	1.34813e-09
0.00906714	1.34813e-09
0.00909042	1.34813e-09
0.00911375	1.34813e-09
0.00913714	1.34814e-09
0.0091606	1.34814e-09
0.00918411	1.34814e-09
0.00920769	1.34814e-09
0.00923132	1.34814e-09
0.00925502	1.34815e-09
0.00927877	1.34815e-09
0.00930259	1.34815e-09
0.00932647	1.34815e-09
0.00935041	1.34815e-09
0.00937441	1.34815e-09
0.00939847	1.34815e-09
0.0094226	1.34815e-09
0.00944678	1.34815e-09
0.00947103	1.34815e-09
0.00949534	1.34815e-09
0.00951971	1.34815e-09
0.00954415	1.34815e-09
0.00956865	1.34815e-09
0.00959321	1.34815e-09
0.00961783	1.34815e-09
0.00964252	1.34815e-09
0.00966727	1.34815e-09
0.00969209	1.34816e-09
0.00971696	1.34816e-09
0.00974191	1.34816e-09
0.00976691	1.34816e-09
0.00979198	1.34816e-09
0.00981712	1.34816e-09
0.00984232	1.34816e-09
0.00986758	1.34816e-09
0.00989291	1.34816e-09
0.0099183	1.34816e-09
0.00994376	1.34816e-09
0.00996928	1.34816e-09
0.00999487	1.34816e-09
0.0100205	1.34816e-09
0.0100463	1.34816e-09
0.010072	1.34816e-09
0.0100979	1.34816e-09
0.0101238	1.34816e-09
0.0101498	1.34816e-09
0.0101759	1.34816e-09
0.010202	1.34816e-09
0.0102282	1.34816e-09
0.0102544	1.34816e-09
0.0102807	1.34816e-09
0.0103071	1.34817e-09
0.0103336	1.34817e-09
0.0103601	1.34817e-09
0.0103867	1.34817e-09
0.0104134	1.34817e-09
0.0104401	1.34817e-09
0.0104669	1.34817e-09
0.0104938	1.34818e-09
0.0105207	1.34818e-09
0.0105477	1.34818e-09
0.0105748	1.34818e-09
0.0106019	1.34818e-09
0.0106291	1.34818e-09
0.0106564	1.34818e-09
0.0106838	1.34818e-09
0.0107112	1.34818e-09
0.0107387	1.34818e-09
0.0107662	1.34818e-09
0.0107939	1.34818e-09
0.0108216	1.34818e-09
0.0108494	1.34818e-09
0.0108772	1.34818e-09
0.0109051	1.34819e-09
0.0109331	1.34819e-09
0.0109612	1.34819e-09
0.0109893	1.34819e-09
0.0110175	1.34819e-09
0.0110458	1.34819e-09
0.0110742	1.34819e-09
0.0111026	1.34819e-09
0.0111311	1.34819e-09
0.0111597	1.34819e-09
0.0111883	1.34819e-09
0.011217	1.34819e-09
0.0112458	1.34819e-09
0.0112747	1.34819e-09
0.0113036	1.34819e-09
0.0113326	1.34819e-09
0.0113617	1.34819e-09
0.0113909	1.34819e-09
0.0114201	1.34819e-09
0.0114494	1.34819e-09
0.0114788	1.34819e-09
0.0115083	1.34819e-09
0.0115378	1.34819e-09
0.0115674	1.3482e-09
0.0115971	1.3482e-09
0.0116269	1.3482e-09
0.0116568	1.3482e-09
0.0116867	1.3482e-09
0.0117167	1.34821e-09
0.0117467	1.34821e-09
0.0117769	1.34821e-09
0.0118071	1.34821e-09
0.0118374	1.34821e-09
0.0118678	1.34821e-09
0.0118983	1.34821e-09
0.0119288	1.34821e-09
0.0119594	1.34821e-09
0.0119901	1.34821e-09
0.0120209	1.34821e-09
0.0120518	1.34821e-09
0.0120827	1.34821e-09
0.0121137	1.34822e-09
0.0121448	1.34822e-09
0.012176	1.34822e-09
0.0122072	1.34822e-09
0.0122386	1.34822e-09
0.01227	1.34822e-09
0.0123015	1.34822e-09
0.0123331	1.34822e-09
0.0123647	1.34822e-09
0.0123965	1.34822e-09
0.0124283	1.34822e-09
0.0124602	1.34822e-09
0.0124922	1.34822e-09
0.0125242	1.34822e-09
0.0125564	1.34822e-09
0.0125886	1.34822e-09
0.0126209	1.34822e-09
0.0126533	1.34822e-09
0.0126858	1.34823e-09
0.0127184	1.34824e-09
0.012751	1.34824e-09
0.0127837	1.34824e-09
0.0128165	1.34824e-09
0.0128494	1.34824e-09
0.0128824	1.34824e-09
0.0129155	1.34824e-09
0.0129486	1.34824e-09
0.0129819	1.34824e-09
0.0130152	1.34824e-09
0.0130486	1.34824e-09
0.0130821	1.34824e-09
0.0131157	1.34824e-09
0.0131494	1.34825e-09
0.0131831	1.34825e-09
0.0132169	1.34825e-09
0.0132509	1.34825e-09
0.0132849	1.34825e-09
0.013319	1.34825e-09
0.0133532	1.34825e-09
0.0133874	1.34825e-09
0.0134218	1.34825e-09
0.0134563	1.34825e-09
0.0134908	1.34825e-09
0.0135254	1.34825e-09
0.0135602	1.34825e-09
0.013595	1.34825e-09
0.0136299	1.34825e-09
0.0136648	1.34825e-09
0.0136999	1.34825e-09
0.0137351	1.34825e-09
0.0137703	1.34825e-09
0.0138057	1.34826e-09
0.0138411	1.34826e-09
0.0138766	1.34826e-09
0.0139123	1.34826e-09
0.013948	1.34827e-09
0.0139838	1.34827e-09
0.0140197	1.34827e-09
0.0140557	1.34827e-09
0.0140917	1.34827e-09
0.0141279	1.34827e-09
0.0141642	1.34827e-09
0.0142005	1.34827e-09
0.014237	1.34827e-09
0.0142735	1.34827e-09
0.0143102	1.34827e-09
0.0143469	1.34827e-09
0.0143837	1.34828e-09
0.0144206	1.34828e-09
0.0144577	1.34828e-09
0.0144948	1.34828e-09
0.014532	1.34828e-09
0.0145693	1.34828e-09
0.0146067	1.34828e-09
0.0146442	1.34828e-09
0.0146818	1.34828e-09
0.0147194	1.34828e-09
0.0147572	1.34828e-09
0.0147951	1.34828e-09
0.0148331	1.34828e-09
0.0148712	1.34828e-09
0.0149093	1.34829e-09
0.0149476	1.34829e-09
0.014986	1.34829e-09
0.0150244	1.34829e-09
0.015063	1.34829e-09
0.0151017	1.3483e-09
0.0151404	1.3483e-09
0.0151793	1.3483e-09
0.0152183	1.3483e-09
0.0152573	1.3483e-09
0.0152965	1.3483e-09
0.0153357	1.3483e-09
0.0153751	1.3483e-09
0.0154146	1.3483e-09
0.0154541	1.3483e-09
0.0154938	1.3483e-09
0.0155336	1.3483e-09
0.0155734	1.34831e-09
0.0156134	1.34831e-09
0.0156535	1.34831e-09
0.0156937	1.34831e-09
0.015734	1.34831e-09
0.0157743	1.34831e-09
0.0158148	1.34831e-09
0.0158554	1.34831e-09
0.0158961	1.34831e-09
0.0159369	1.34831e-09
0.0159778	1.34831e-09
0.0160189	1.34831e-09
0.01606	1.34831e-09
0.0161012	1.34831e-09
0.0161425	1.34831e-09
0.016184	1.34831e-09
0.0162255	1.34831e-09
0.0162672	1.34831e-09
0.0163089	1.34832e-09
0.0163508	1.34833e-09
0.0163927	1.34833e-09
0.0164348	1.34833e-09
0.016477	1.34833e-09
0.0165193	1.34833e-09
0.0165617	1.34833e-09
0.0166042	1.34833e-09
0.0166468	1.34833e-09
0.0166896	1.34833e-09
0.0167324	1.34833e-09
0.0167753	1.34833e-09
0.0168184	1.34833e-09
0.0168616	1.34834e-09
0.0169049	1.34834e-09
0.0169483	1.34834e-09
0.0169918	1.34834e-09
0.0170354	1.34834e-09
0.0170791	1.34834e-09
0.0171229	1.34834e-09
0.0171669	1.34834e-09
0.017211	1.34834e-09
0.0172551	1.34834e-09
0.0172994	1.34835e-09
0.0173438	1.34835e-09
0.0173883	1.34835e-09
0.017433	1.34835e-09
0.0174777	1.34835e-09
0.0175226	1.34836e-09
0.0175676	1.34836e-09
0.0176127	1.34836e-09
0.0176579	1.34836e-09
0.0177032	1.34836e-09
0.0177486	1.34836e-09
0.0177942	1.34836e-09
0.0178399	1.34837e-09
0.0178857	1.34837e-09
0.0179316	1.34837e-09
0.0179776	1.34837e-09
0.0180237	1.34837e-09
0.01807	1.34837e-09
0.0181164	1.34837e-09
0.0181629	1.34837e-09
0.0182095	1.34837e-09
0.0182563	1.34837e-09
0.0183031	1.34837e-09
0.0183501	1.34838e-09
0.0183972	1.34838e-09
0.0184444	1.34838e-09
0.0184918	1.34838e-09
0.0185392	1.34838e-09
0.0185868	1.34838e-09
0.0186345	1.34838e-09
0.0186824	1.34839e-09
0.0187303	1.34839e-09
0.0187784	1.34839e-09
0.0188266	1.34839e-09
0.0188749	1.34839e-09
0.0189234	1.34839e-09
0.0189719	1.34839e-09
0.0190206	1.34839e-09
0.0190695	1.3484e-09
0.0191184	1.3484e-09
0.0191675	1.3484e-09
0.0192167	1.3484e-09
0.019266	1.3484e-09
0.0193155	1.3484e-09
0.019365	1.3484e-09
0.0194148	1.3484e-09
0.0194646	1.3484e-09
0.0195145	1.3484e-09
0.0195646	1.3484e-09
0.0196149	1.3484e-09
0.0196652	1.34841e-09
0.0197157	1.34841e-09
0.0197663	1.34841e-09
0.019817	1.34841e-09
0.0198679	1.34841e-09
0.0199189	1.34842e-09
0.01997	1.34842e-09
0.0200213	1.34842e-09
0.0200727	1.34842e-09
0.0201242	1.34842e-09
0.0201759	1.34842e-09
0.0202276	1.34842e-09
0.0202796	1.34842e-09
0.0203316	1.34843e-09
0.0203838	1.34843e-09
0.0204361	1.34843e-09
0.0204886	1.34843e-09
0.0205412	1.34843e-09
0.0205939	1.34843e-09
0.0206468	1.34843e-09
0.0206998	1.34843e-09
0.0207529	1.34843e-09
0.0208062	1.34843e-09
0.0208596	1.34843e-09
0.0209131	1.34843e-09
0.0209668	1.34843e-09
0.0210206	1.34844e-09
0.0210746	1.34845e-09
0.0211287	1.34845e-09
0.0211829	1.34845e-09
0.0212373	1.34845e-09
0.0212918	1.34845e-09
0.0213464	1.34845e-09
0.0214012	1.34846e-09
0.0214562	1.34846e-09
0.0215112	1.34846e-09
0.0215665	1.34846e-09
0.0216218	1.34846e-09
0.0216773	1.34846e-09
0.021733	1.34846e-09
0.0217887	1.34846e-09
0.0218447	1.34846e-09
0.0219007	1.34846e-09
0.021957	1.34846e-09
0.0220133	1.34847e-09
0.0220698	1.34847e-09
0.0221265	1.34847e-09
0.0221833	1.34847e-09
0.0222402	1.34848e-09
0.0222973	1.34848e-09
0.0223545	1.34848e-09
0.0224119	1.34848e-09
0.0224694	1.34848e-09
0.0225271	1.34848e-09
0.0225849	1.34848e-09
0.0226429	1.34849e-09
0.022701	1.34849e-09
0.0227593	1.34849e-09
0.0228177	1.34849e-09
0.0228763	1.34849e-09
0.022935	1.34849e-09
0.0229939	1.34849e-09
0.0230529	1.34849e-09
0.0231121	1.3485e-09
0.0231714	1.3485e-09
0.0232309	1.3485e-09
0.0232905	1.3485e-09
0.0233503	1.3485e-09
0.0234102	1.3485e-09
0.0234703	1.3485e-09
0.0235306	1.34851e-09
0.023591	1.34851e-09
0.0236515	1.34851e-09
0.0237122	1.34851e-09
0.0237731	1.34851e-09
0.0238341	1.34851e-09
0.0238953	1.34851e-09
0.0239566	1.34852e-09
0.0240181	1.34852e-09
0.0240798	1.34852e-09
0.0241416	1.34852e-09
0.0242035	1.34852e-09
0.0242657	1.34852e-09
0.024328	1.34852e-09
0.0243904	1.34852e-09
0.024453	1.34852e-09
0.0245158	1.34852e-09
0.0245787	1.34852e-09
0.0246418	1.34853e-09
0.024705	1.34853e-09
0.0247685	1.34854e-09
0.024832	1.34854e-09
0.0248958	1.34854e-09
0.0249597	1.34854e-09
0.0250237	1.34854e-09
0.025088	1.34854e-09
0.0251524	1.34854e-09
0.0252169	1.34855e-09
0.0252817	1.34855e-09
0.0253466	1.34855e-09
0.0254116	1.34855e-09
0.0254768	1.34855e-09
0.0255422	1.34855e-09
0.0256078	1.34855e-09
0.0256735	1.34856e-09
0.0257394	1.34856e-09
0.0258055	1.34856e-09
0.0258717	1.34856e-09
0.0259381	1.34857e-09
0.0260047	1.34857e-09
0.0260715	1.34857e-09
0.0261384	1.34857e-09
0.0262055	1.34857e-09
0.0262728	1.34857e-09
0.0263402	1.34858e-09
0.0264078	1.34858e-09
0.0264756	1.34858e-09
0.0265436	1.34858e-09
0.0266117	1.34858e-09
0.02668	1.34858e-09
0.0267485	1.34858e-09
0.0268171	1.34858e-09
0.026886	1.34858e-09
0.026955	1.34859e-09
0.0270242	1.34859e-09
0.0270935	1.34859e-09
0.0271631	1.3486e-09
0.0272328	1.3486e-09
0.0273027	1.3486e-09
0.0273728	1.3486e-09
0.0274431	1.3486e-09
0.0275135	1.3486e-09
0.0275841	1.34861e-09
0.0276549	1.34861e-09
0.0277259	1.34861e-09
0.0277971	1.34861e-09
0.0278684	1.34861e-09
0.02794	1.34861e-09
0.0280117	1.34861e-09
0.0280836	1.34861e-09
0.0281557	1.34861e-09
0.0282279	1.34862e-09
0.0283004	1.34862e-09
0.028373	1.34862e-09
0.0284459	1.34863e-09
0.0285189	1.34863e-09
0.0285921	1.34863e-09
0.0286655	1.34863e-09
0.0287391	1.34863e-09
0.0288128	1.34864e-09
0.0288868	1.34864e-09
0.0289609	1.34864e-09
0.0290353	1.34864e-09
0.0291098	1.34865e-09
0.0291845	1.34865e-09
0.0292594	1.34865e-09
0.0293345	1.34865e-09
0.0294098	1.34866e-09
0.0294853	1.34866e-09
0.029561	1.34866e-09
0.0296369	1.34866e-09
0.029713	1.34866e-09
0.0297892	1.34866e-09
0.0298657	1.34866e-09
0.0299424	1.34867e-09
0.0300192	1.34867e-09
0.0300963	1.34867e-09
0.0301735	1.34867e-09
0.030251	1.34867e-09
0.0303286	1.34867e-09
0.0304065	1.34868e-09
0.0304845	1.34868e-09
0.0305628	1.34868e-09
0.0306412	1.34869e-09
0.0307199	1.34869e-09
0.0307987	1.34869e-09
0.0308778	1.34869e-09
0.030957	1.34869e-09
0.0310365	1.34869e-09
0.0311162	1.34869e-09
0.031196	1.34869e-09
0.0312761	1.3487e-09
0.0313564	1.3487e-09
0.0314369	1.3487e-09
0.0315176	1.3487e-09
0.0315985	1.3487e-09
0.0316796	1.3487e-09
0.0317609	1.3487e-09
0.0318424	1.34871e-09
0.0319242	1.34872e-09
0.0320061	1.34872e-09
0.0320882	1.34872e-09
0.0321706	1.34872e-09
0.0322532	1.34872e-09
0.032336	1.34872e-09
0.032419	1.34872e-09
0.0325022	1.34873e-09
0.0325856	1.34873e-09
0.0326693	1.34872e-09
0.0327531	1.34873e-09
0.0328372	1.34873e-09
0.0329215	1.34873e-09
0.033006	1.34873e-09
0.0330907	1.34873e-09
0.0331756	1.34873e-09
0.0332608	1.34874e-09
0.0333462	1.34874e-09
0.0334318	1.34875e-09
0.0335176	1.34875e-09
0.0336036	1.34875e-09
0.0336899	1.34875e-09
0.0337764	1.34875e-09
0.0338631	1.34876e-09
0.03395	1.34876e-09
0.0340371	1.34876e-09
0.0341245	1.34876e-09
0.0342121	1.34877e-09
0.0342999	1.34877e-09
0.0343879	1.34878e-09
0.0344762	1.34878e-09
0.0345647	1.34878e-09
0.0346534	1.34878e-09
0.0347424	1.34878e-09
0.0348316	1.34878e-09
0.034921	1.34879e-09
0.0350106	1.34879e-09
0.0351005	1.34879e-09
0.0351906	1.34879e-09
0.0352809	1.34879e-09
0.0353714	1.34879e-09
0.0354622	1.34879e-09
0.0355533	1.3488e-09
0.0356445	1.3488e-09
0.035736	1.3488e-09
0.0358278	1.34881e-09
0.0359197	1.34881e-09
0.0360119	1.34881e-09
0.0361044	1.34881e-09
0.036197	1.34882e-09
0.0362899	1.34882e-09
0.0363831	1.34882e-09
0.0364765	1.34882e-09
0.0365701	1.34882e-09
0.036664	1.34883e-09
0.0367581	1.34883e-09
0.0368524	1.34883e-09
0.036947	1.34883e-09
0.0370419	1.34884e-09
0.037137	1.34884e-09
0.0372323	1.34884e-09
0.0373278	1.34884e-09
0.0374237	1.34884e-09
0.0375197	1.34884e-09
0.037616	1.34884e-09
0.0377126	1.34885e-09
0.0378094	1.34885e-09
0.0379064	1.34885e-09
0.0380037	1.34885e-09
0.0381013	1.34885e-09
0.0381991	1.34886e-09
0.0382971	1.34886e-09
0.0383954	1.34887e-09
0.038494	1.34887e-09
0.0385928	1.34888e-09
0.0386919	1.34888e-09
0.0387912	1.34888e-09
0.0388908	1.34888e-09
0.0389906	1.34888e-09
0.0390907	1.34888e-09
0.039191	1.34889e-09
0.0392916	1.34889e-09
0.0393925	1.34889e-09
0.0394936	1.3489e-09
0.0395949	1.3489e-09
0.0396966	1.3489e-09
0.0397985	1.3489e-09
0.0399006	1.3489e-09
0.040003	1.34891e-09
0.0401057	1.34891e-09
0.0402087	1.34891e-09
0.0403119	1.34891e-09
0.0404154	1.34892e-09
0.0405191	1.34892e-09
0.0406231	1.34892e-09
0.0407274	1.34892e-09
0.0408319	1.34892e-09
0.0409367	1.34893e-09
0.0410418	1.34893e-09
0.0411472	1.34893e-09
0.0412528	1.34893e-09
0.0413587	1.34893e-09
0.0414648	1.34894e-09
0.0415713	1.34894e-09
0.041678	1.34894e-09
0.0417849	1.34894e-09
0.0418922	1.34894e-09
0.0419997	1.34895e-09
0.0421075	1.34896e-09
0.0422156	1.34896e-09
0.042324	1.34896e-09
0.0424326	1.34896e-09
0.0425415	1.34896e-09
0.0426507	1.34897e-09
0.0427602	1.34897e-09
0.04287	1.34897e-09
0.04298	1.34897e-09
0.0430903	1.34898e-09
0.0432009	1.34899e-09
0.0433118	1.34899e-09
0.043423	1.34899e-09
0.0435345	1.34899e-09
0.0436462	1.34899e-09
0.0437582	1.349e-09
0.0438706	1.349e-09
0.0439832	1.349e-09
0.0440961	1.34901e-09
0.0442093	1.34901e-09
0.0443227	1.34901e-09
0.0444365	1.34901e-09
0.0445506	1.34902e-09
0.0446649	1.34902e-09
0.0447796	1.34902e-09
0.0448945	1.34902e-09
0.0450098	1.34902e-09
0.0451253	1.34902e-09
0.0452411	1.34902e-09
0.0453572	1.34903e-09
0.0454737	1.34903e-09
0.0455904	1.34903e-09
0.0457074	1.34903e-09
0.0458247	1.34903e-09
0.0459424	1.34904e-09
0.0460603	1.34904e-09
0.0461785	1.34905e-09
0.0462971	1.34905e-09
0.0464159	1.34905e-09
0.046535	1.34905e-09
0.0466545	1.34906e-09
0.0467742	1.34906e-09
0.0468943	1.34906e-09
0.0470147	1.34906e-09
0.0471353	1.34907e-09
0.0472563	1.34908e-09
0.0473776	1.34908e-09
0.0474992	1.34908e-09
0.0476212	1.34909e-09
0.0477434	1.34909e-09
0.047866	1.34909e-09
0.0479888	1.34909e-09
0.048112	1.3491e-09
0.0482355	1.3491e-09
0.0483593	1.34911e-09
0.0484834	1.34911e-09
0.0486079	1.34911e-09
0.0487327	1.34911e-09
0.0488577	1.34911e-09
0.0489832	1.34912e-09
0.0491089	1.34912e-09
0.0492349	1.34912e-09
0.0493613	1.34912e-09
0.049488	1.34913e-09
0.0496151	1.34913e-09
0.0497424	1.34913e-09
0.0498701	1.34914e-09
0.0499981	1.34914e-09
0.0501264	1.34914e-09
0.0502551	1.34914e-09
0.0503841	1.34915e-09
0.0505134	1.34915e-09
0.0506431	1.34916e-09
0.0507731	1.34916e-09
0.0509034	1.34916e-09
0.0510341	1.34916e-09
0.0511651	1.34916e-09
0.0512964	1.34917e-09
0.0514281	1.34917e-09
0.0515601	1.34917e-09
0.0516924	1.34917e-09
0.0518251	1.34919e-09
0.0519581	1.34919e-09
0.0520915	1.34919e-09
0.0522252	1.34919e-09
0.0523593	1.34919e-09
0.0524937	1.3492e-09
0.0526284	1.3492e-09
0.0527635	1.3492e-09
0.0528989	1.3492e-09
0.0530347	1.34921e-09
0.0531708	1.34921e-09
0.0533073	1.34922e-09
0.0534442	1.34922e-09
0.0535813	1.34922e-09
0.0537189	1.34922e-09
0.0538568	1.34923e-09
0.053995	1.34923e-09
0.0541336	1.34923e-09
0.0542726	1.34923e-09
0.0544119	1.34923e-09
0.0545515	1.34924e-09
0.0546916	1.34924e-09
0.0548319	1.34924e-09
0.0549727	1.34924e-09
0.0551138	1.34925e-09
0.0552553	1.34925e-09
0.0553971	1.34925e-09
0.0555393	1.34926e-09
0.0556818	1.34926e-09
0.0558248	1.34926e-09
0.0559681	1.34927e-09
0.0561117	1.34927e-09
0.0562558	1.34927e-09
0.0564002	1.34927e-09
0.0565449	1.34928e-09
0.0566901	1.34928e-09
0.0568356	1.34929e-09
0.0569815	1.34929e-09
0.0571277	1.3493e-09
0.0572744	1.3493e-09
0.0574214	1.3493e-09
0.0575688	1.3493e-09
0.0577166	1.34931e-09
0.0578647	1.34931e-09
0.0580132	1.34931e-09
0.0581621	1.34932e-09
0.0583114	1.34932e-09
0.0584611	1.34933e-09
0.0586112	1.34933e-09
0.0587616	1.34933e-09
0.0589124	1.34933e-09
0.0590637	1.34934e-09
0.0592153	1.34934e-09
0.0593673	1.34934e-09
0.0595197	1.34935e-09
0.0596724	1.34935e-09
0.0598256	1.34936e-09
0.0599792	1.34936e-09
0.0601331	1.34936e-09
0.0602875	1.34936e-09
0.0604422	1.34937e-09
0.0605974	1.34937e-09
0.0607529	1.34937e-09
0.0609089	1.34938e-09
0.0610652	1.34939e-09
0.0612219	1.34939e-09
0.0613791	1.34939e-09
0.0615366	1.34939e-09
0.0616946	1.3494e-09
0.061853	1.3494e-09
0.0620117	1.3494e-09
0.0621709	1.3494e-09
0.0623305	1.34942e-09
0.0624905	1.34942e-09
0.0626509	1.34943e-09
0.0628117	1.34943e-09
0.0629729	1.34943e-09
0.0631346	1.34944e-09
0.0632966	1.34944e-09
0.0634591	1.34944e-09
0.063622	1.34944e-09
0.0637853	1.34945e-09
0.063949	1.34945e-09
0.0641132	1.34946e-09
0.0642777	1.34946e-09
0.0644427	1.34946e-09
0.0646081	1.34947e-09
0.064774	1.34947e-09
0.0649402	1.34947e-09
0.0651069	1.34947e-09
0.0652741	1.34949e-09
0.0654416	1.34949e-09
0.0656096	1.34949e-09
0.065778	1.3495e-09
0.0659468	1.3495e-09
0.0661161	1.3495e-09
0.0662858	1.3495e-09
0.066456	1.34951e-09
0.0666265	1.34951e-09
0.0667976	1.34952e-09
0.066969	1.34952e-09
0.0671409	1.34952e-09
0.0673133	1.34953e-09
0.067486	1.34953e-09
0.0676593	1.34953e-09
0.0678329	1.34954e-09
0.0680071	1.34954e-09
0.0681816	1.34954e-09
0.0683566	1.34955e-09
0.0685321	1.34955e-09
0.068708	1.34956e-09
0.0688844	1.34956e-09
0.0690612	1.34956e-09
0.0692385	1.34957e-09
0.0694162	1.34957e-09
0.0695944	1.34957e-09
0.069773	1.34957e-09
0.0699521	1.34958e-09
0.0701316	1.34958e-09
0.0703117	1.34959e-09
0.0704921	1.34959e-09
0.0706731	1.34959e-09
0.0708545	1.3496e-09
0.0710364	1.3496e-09
0.0712187	1.3496e-09
0.0714015	1.34961e-09
0.0715848	1.34962e-09
0.0717685	1.34962e-09
0.0719528	1.34962e-09
0.0721374	1.34963e-09
0.0723226	1.34963e-09
0.0725083	1.34963e-09
0.0726944	1.34964e-09
0.072881	1.34964e-09
0.073068	1.34964e-09
0.0732556	1.34966e-09
0.0734436	1.34966e-09
0.0736321	1.34966e-09
0.0738211	1.34967e-09
0.0740106	1.34967e-09
0.0742006	1.34967e-09
0.0743911	1.34968e-09
0.074582	1.34968e-09
0.0747735	1.34968e-09
0.0749654	1.3497e-09
0.0751578	1.3497e-09
0.0753507	1.3497e-09
0.0755442	1.34971e-09
0.0757381	1.34971e-09
0.0759325	1.34971e-09
0.0761274	1.34972e-09
0.0763228	1.34972e-09
0.0765187	1.34972e-09
0.0767151	1.34973e-09
0.076912	1.34973e-09
0.0771094	1.34974e-09
0.0773074	1.34974e-09
0.0775058	1.34974e-09
0.0777047	1.34975e-09
0.0779042	1.34975e-09
0.0781042	1.34975e-09
0.0783047	1.34976e-09
0.0785056	1.34976e-09
0.0787072	1.34977e-09
0.0789092	1.34977e-09
0.0791117	1.34977e-09
0.0793148	1.34978e-09
0.0795184	1.34978e-09
0.0797225	1.34978e-09
0.0799271	1.34979e-09
0.0801323	1.34979e-09
0.080338	1.34981e-09
0.0805442	1.34981e-09
0.0807509	1.34982e-09
0.0809582	1.34982e-09
0.081166	1.34982e-09
0.0813744	1.34983e-09
0.0815832	1.34983e-09
0.0817927	1.34983e-09
0.0820026	1.34984e-09
0.0822131	1.34985e-09
0.0824241	1.34985e-09
0.0826357	1.34985e-09
0.0828478	1.34986e-09
0.0830605	1.34986e-09
0.0832737	1.34986e-09
0.0834874	1.34987e-09
0.0837017	1.34987e-09
0.0839166	1.34987e-09
0.084132	1.34988e-09
0.0843479	1.34988e-09
0.0845644	1.34989e-09
0.0847815	1.34989e-09
0.0849991	1.34989e-09
0.0852173	1.3499e-09
0.085436	1.3499e-09
0.0856553	1.34991e-09
0.0858752	1.34991e-09
0.0860956	1.34993e-09
0.0863166	1.34993e-09
0.0865382	1.34994e-09
0.0867603	1.34994e-09
0.086983	1.34994e-09
0.0872063	1.34995e-09
0.0874301	1.34995e-09
0.0876545	1.34995e-09
0.0878795	1.34996e-09
0.0881051	1.34997e-09
0.0883313	1.34997e-09
0.088558	1.34997e-09
0.0887853	1.34998e-09
0.0890132	1.34998e-09
0.0892417	1.34999e-09
0.0894708	1.34999e-09
0.0897004	1.34999e-09
0.0899307	1.35e-09
0.0901615	1.35e-09
0.0903929	1.35001e-09
0.090625	1.35001e-09
0.0908576	1.35002e-09
0.0910908	1.35002e-09
0.0913246	1.35002e-09
0.091559	1.35003e-09
0.091794	1.35003e-09
0.0920297	1.35003e-09
0.0922659	1.35005e-09
0.0925027	1.35006e-09
0.0927402	1.35006e-09
0.0929782	1.35006e-09
0.0932169	1.35007e-09
0.0934561	1.35007e-09
0.093696	1.35008e-09
0.0939365	1.35008e-09
0.0941777	1.35008e-09
0.0944194	1.35009e-09
0.0946618	1.35009e-09
0.0949047	1.3501e-09
0.0951483	1.3501e-09
0.0953926	1.3501e-09
0.0956374	1.35011e-09
0.0958829	1.35011e-09
0.096129	1.35012e-09
0.0963758	1.35012e-09
0.0966232	1.35014e-09
0.0968712	1.35014e-09
0.0971198	1.35015e-09
0.0973691	1.35015e-09
0.0976191	1.35016e-09
0.0978696	1.35016e-09
0.0981208	1.35016e-09
0.0983727	1.35017e-09
0.0986252	1.35017e-09
0.0988784	1.35018e-09
0.0991322	1.35018e-09
0.0993866	1.35019e-09
0.0996417	1.35019e-09
0.0998975	1.35019e-09
0.100154	1.3502e-09
0.100411	1.3502e-09
0.100669	1.35021e-09
0.100927	1.35021e-09
0.101186	1.35023e-09
0.101446	1.35024e-09
0.101706	1.35024e-09
0.101967	1.35024e-09
0.102229	1.35025e-09
0.102492	1.35025e-09
0.102755	1.35026e-09
0.103018	1.35026e-09
0.103283	1.35026e-09
0.103548	1.35027e-09
0.103814	1.35027e-09
0.10408	1.35028e-09
0.104347	1.35028e-09
0.104615	1.35029e-09
0.104884	1.35029e-09
0.105153	1.35029e-09
0.105423	1.3503e-09
0.105693	1.3503e-09
0.105965	1.35033e-09
0.106237	1.35033e-09
0.106509	1.35033e-09
0.106783	1.35034e-09
0.107057	1.35034e-09
0.107332	1.35035e-09
0.107607	1.35035e-09
0.107883	1.35035e-09
0.10816	1.35036e-09
0.108438	1.35037e-09
0.108716	1.35038e-09
0.108995	1.35038e-09
0.109275	1.35038e-09
0.109556	1.35039e-09
0.109837	1.35039e-09
0.110119	1.3504e-09
0.110401	1.3504e-09
0.110685	1.3504e-09
0.110969	1.35041e-09
0.111254	1.35042e-09
0.111539	1.35042e-09
0.111826	1.35043e-09
0.112113	1.35043e-09
0.1124	1.35044e-09
0.112689	1.35044e-09
0.112978	1.35044e-09
0.113268	1.35045e-09
0.113559	1.35047e-09
0.11385	1.35048e-09
0.114143	1.35048e-09
0.114436	1.35048e-09
0.114729	1.35049e-09
0.115024	1.35049e-09
0.115319	1.3505e-09
0.115615	1.3505e-09
0.115912	1.35051e-09
0.116209	1.35052e-09
0.116508	1.35052e-09
0.116807	1.35053e-09
0.117107	1.35053e-09
0.117407	1.35054e-09
0.117709	1.35054e-09
0.118011	1.35054e-09
0.118314	1.35055e-09
0.118617	1.35055e-09
0.118922	1.35057e-09
0.119227	1.35057e-09
0.119533	1.35057e-09
0.11984	1.35058e-09
0.120148	1.35058e-09
0.120456	1.35059e-09
0.120765	1.35059e-09
0.121075	1.3506e-09
0.121386	1.3506e-09
0.121698	1.35062e-09
0.12201	1.35062e-09
0.122323	1.35063e-09
0.122637	1.35063e-09
0.122952	1.35064e-09
0.123267	1.35064e-09
0.123584	1.35065e-09
0.123901	1.35065e-09
0.124219	1.35066e-09
0.124538	1.35067e-09
0.124858	1.35068e-09
0.125178	1.35068e-09
0.125499	1.35069e-09
0.125822	1.35069e-09
0.126145	1.3507e-09
0.126468	1.3507e-09
0.126793	1.3507e-09
0.127118	1.35071e-09
0.127445	1.35073e-09
0.127772	1.35073e-09
0.1281	1.35074e-09
0.128429	1.35074e-09
0.128758	1.35074e-09
0.129089	1.35075e-09
0.12942	1.35075e-09
0.129752	1.35076e-09
0.130085	1.35076e-09
0.130419	1.35077e-09
0.130754	1.35078e-09
0.13109	1.35078e-09
0.131426	1.35079e-09
0.131764	1.35079e-09
0.132102	1.3508e-09
0.132441	1.3508e-09
0.132781	1.35081e-09
0.133122	1.35081e-09
0.133463	1.35083e-09
0.133806	1.35083e-09
0.134149	1.35084e-09
0.134494	1.35084e-09
0.134839	1.35085e-09
0.135185	1.35085e-09
0.135532	1.35086e-09
0.13588	1.35086e-09
0.136229	1.35087e-09
0.136578	1.35089e-09
0.136929	1.35089e-09
0.13728	1.3509e-09
0.137633	1.3509e-09
0.137986	1.35091e-09
0.13834	1.35091e-09
0.138695	1.35092e-09
0.139051	1.35092e-09
0.139408	1.35093e-09
0.139766	1.35095e-09
0.140125	1.35095e-09
0.140485	1.35096e-09
0.140845	1.35096e-09
0.141207	1.35097e-09
0.141569	1.35097e-09
0.141933	1.35098e-09
0.142297	1.35098e-09
0.142662	1.35099e-09
0.143028	1.351e-09
0.143395	1.35101e-09
0.143763	1.35101e-09
0.144133	1.35101e-09
0.144502	1.35102e-09
0.144873	1.35102e-09
0.145245	1.35103e-09
0.145618	1.35103e-09
0.145992	1.35104e-09
0.146367	1.35106e-09
0.146742	1.35106e-09
0.147119	1.35107e-09
0.147497	1.35107e-09
0.147875	1.35108e-09
0.148255	1.35108e-09
0.148635	1.35109e-09
0.149017	1.35109e-09
0.149399	1.3511e-09
0.149783	1.35112e-09
0.150167	1.35112e-09
0.150553	1.35113e-09
0.150939	1.35113e-09
0.151327	1.35114e-09
0.151715	1.35114e-09
0.152104	1.35115e-09
0.152495	1.35115e-09
0.152886	1.35116e-09
0.153279	1.35118e-09
0.153672	1.35118e-09
0.154067	1.35119e-09
0.154462	1.35119e-09
0.154859	1.3512e-09
0.155256	1.3512e-09
0.155655	1.35121e-09
0.156054	1.35121e-09
0.156455	1.35122e-09
0.156856	1.35124e-09
0.157259	1.35124e-09
0.157663	1.35125e-09
0.158067	1.35125e-09
0.158473	1.35126e-09
0.15888	1.35126e-09
0.159288	1.35127e-09
0.159697	1.35127e-09
0.160106	1.35128e-09
0.160517	1.3513e-09
0.160929	1.3513e-09
0.161343	1.35131e-09
0.161757	1.35131e-09
0.162172	1.35132e-09
0.162588	1.35132e-09
0.163005	1.35133e-09
0.163424	1.35134e-09
0.163843	1.35134e-09
0.164264	1.35136e-09
0.164686	1.35137e-09
0.165108	1.35137e-09
0.165532	1.35138e-09
0.165957	1.35138e-09
0.166383	1.35139e-09
0.16681	1.35139e-09
0.167238	1.3514e-09
0.167668	1.3514e-09
0.168098	1.35142e-09
[truncated: 8,409 more rows]
