# Supplementary material for: Rapid growth of new atmospheric particles by nitric acid and ammonia condensation
Source: Nature. 2020 May 13;581(7807):184–9. doi: 10.1038/s41586-020-2270-4 (PMC7334196; doi:10.1038/s41586-020-2270-4)
Supplement: Supplementary file 5 — Source Data Extended Data Fig. 1 [file 41586_2020_2270_MOESM5_ESM.xlsx]

## Sheet: a
Time (UTC)	HNO3 (pptv)		Time (UTC)	NH3 (pptv)
2018-11-14 05:00:00	34.5367		2018-11-14 05:00:00	1436.19
2018-11-14 05:00:05	34.5811		2018-11-14 05:00:05	1437.63
2018-11-14 05:00:10	34.587		2018-11-14 05:00:10	1438.63
2018-11-14 05:00:15	34.5516		2018-11-14 05:00:15	1439.84
2018-11-14 05:00:20	34.4645		2018-11-14 05:00:20	1441.53
2018-11-14 05:00:25	34.3252		2018-11-14 05:00:25	1443.53
2018-11-14 05:00:30	34.1514		2018-11-14 05:00:30	1445.59
2018-11-14 05:00:35	33.9707		2018-11-14 05:00:35	1447.63
2018-11-14 05:00:40	33.8021		2018-11-14 05:00:40	1449.68
2018-11-14 05:00:45	33.6428		2018-11-14 05:00:45	1451.72
2018-11-14 05:00:50	33.4721		2018-11-14 05:00:50	1453.78
2018-11-14 05:00:55	33.2807		2018-11-14 05:00:55	1455.94
2018-11-14 05:01:00	33.0936		2018-11-14 05:01:00	1458.04
2018-11-14 05:01:05	32.9513		2018-11-14 05:01:06	1459.7
2018-11-14 05:01:10	32.8678		2018-11-14 05:01:11	1460.67
2018-11-14 05:01:15	32.8244		2018-11-14 05:01:16	1461.05
2018-11-14 05:01:20	32.8056		2018-11-14 05:01:21	1461.02
2018-11-14 05:01:25	32.8212		2018-11-14 05:01:26	1460.49
2018-11-14 05:01:30	32.8824		2018-11-14 05:01:31	1459.51
2018-11-14 05:01:35	32.9733		2018-11-14 05:01:36	1458.54
2018-11-14 05:01:40	33.0613		2018-11-14 05:01:41	1458.01
2018-11-14 05:01:45	33.1254		2018-11-14 05:01:46	1458
2018-11-14 05:01:50	33.1647		2018-11-14 05:01:51	1458.38
2018-11-14 05:01:55	33.186		2018-11-14 05:01:56	1459.17
2018-11-14 05:02:00	33.1943		2018-11-14 05:02:01	1460.44
2018-11-14 05:02:05	33.1957		2018-11-14 05:02:06	1462.17
2018-11-14 05:02:10	33.2078		2018-11-14 05:02:11	1464.45
2018-11-14 05:02:15	33.2701		2018-11-14 05:02:16	1467.6
2018-11-14 05:02:20	33.4315		2018-11-14 05:02:21	1471.8
2018-11-14 05:02:25	33.7054		2018-11-14 05:02:26	1476.67
2018-11-14 05:02:30	34.0366		2018-11-14 05:02:31	1481.4
2018-11-14 05:02:35	34.3322		2018-11-14 05:02:36	1485.47
2018-11-14 05:02:40	34.529		2018-11-14 05:02:41	1488.98
2018-11-14 05:02:45	34.6293		2018-11-14 05:02:46	1492.42
2018-11-14 05:02:50	34.6794		2018-11-14 05:02:51	1496.03
2018-11-14 05:02:55	34.7199		2018-11-14 05:02:56	1499.42
2018-11-14 05:03:00	34.756		2018-11-14 05:03:01	1501.93
2018-11-14 05:03:06	34.7726		2018-11-14 05:03:06	1503.25
2018-11-14 05:03:11	34.7629		2018-11-14 05:03:11	1503.58
2018-11-14 05:03:16	34.7302		2018-11-14 05:03:16	1503.36
2018-11-14 05:03:21	34.6702		2018-11-14 05:03:21	1503.03
2018-11-14 05:03:26	34.5684		2018-11-14 05:03:26	1502.92
2018-11-14 05:03:31	34.4243		2018-11-14 05:03:31	1503.09
2018-11-14 05:03:36	34.2736		2018-11-14 05:03:36	1503.29
2018-11-14 05:03:41	34.178		2018-11-14 05:03:41	1503.28
2018-11-14 05:03:46	34.181		2018-11-14 05:03:46	1503.21
2018-11-14 05:03:51	34.2664		2018-11-14 05:03:51	1503.69
2018-11-14 05:03:56	34.3599		2018-11-14 05:03:57	1505.29
2018-11-14 05:04:01	34.3793		2018-11-14 05:04:02	1508
2018-11-14 05:04:06	34.2893		2018-11-14 05:04:07	1511.14
2018-11-14 05:04:11	34.1138		2018-11-14 05:04:12	1513.87
2018-11-14 05:04:16	33.9046		2018-11-14 05:04:17	1515.63
2018-11-14 05:04:21	33.7052		2018-11-14 05:04:22	1516.22
2018-11-14 05:04:26	33.5399		2018-11-14 05:04:27	1515.8
2018-11-14 05:04:31	33.4188		2018-11-14 05:04:32	1514.79
2018-11-14 05:04:36	33.3414		2018-11-14 05:04:37	1513.63
2018-11-14 05:04:41	33.2944		2018-11-14 05:04:42	1512.6
2018-11-14 05:04:46	33.2521		2018-11-14 05:04:47	1511.87
2018-11-14 05:04:51	33.1821		2018-11-14 05:04:52	1511.69
2018-11-14 05:04:56	33.0621		2018-11-14 05:04:57	1512.12
2018-11-14 05:05:01	32.9066		2018-11-14 05:05:02	1512.91
2018-11-14 05:05:06	32.766		2018-11-14 05:05:07	1513.8
2018-11-14 05:05:11	32.6821		2018-11-14 05:05:12	1514.96
2018-11-14 05:05:16	32.6464		2018-11-14 05:05:17	1516.81
2018-11-14 05:05:21	32.6134		2018-11-14 05:05:22	1519.44
2018-11-14 05:05:26	32.5493		2018-11-14 05:05:27	1522.44
2018-11-14 05:05:31	32.4564		2018-11-14 05:05:32	1525.37
2018-11-14 05:05:36	32.3609		2018-11-14 05:05:37	1527.93
2018-11-14 05:05:41	32.2852		2018-11-14 05:05:42	1529.81
2018-11-14 05:05:46	32.2308		2018-11-14 05:05:47	1530.72
2018-11-14 05:05:51	32.1799		2018-11-14 05:05:52	1530.68
2018-11-14 05:05:56	32.1113		2018-11-14 05:05:57	1530
2018-11-14 05:06:01	32.0187		2018-11-14 05:06:02	1529.15
2018-11-14 05:06:06	31.9175		2018-11-14 05:06:07	1528.63
2018-11-14 05:06:11	31.8335		2018-11-14 05:06:12	1529.02
2018-11-14 05:06:16	31.784		2018-11-14 05:06:17	1530.63
2018-11-14 05:06:21	31.7735		2018-11-14 05:06:22	1532.97
2018-11-14 05:06:26	31.8027		2018-11-14 05:06:27	1535.02
2018-11-14 05:06:31	31.8694		2018-11-14 05:06:32	1536.2
2018-11-14 05:06:36	31.9665		2018-11-14 05:06:37	1536.82
2018-11-14 05:06:42	32.0885		2018-11-14 05:06:42	1537.66
2018-11-14 05:06:47	32.2291		2018-11-14 05:06:47	1539.22
2018-11-14 05:06:52	32.3651		2018-11-14 05:06:52	1541.42
2018-11-14 05:06:57	32.4621		2018-11-14 05:06:58	1543.79
2018-11-14 05:07:07	32.5046		2018-11-14 05:07:03	1545.76
2018-11-14 05:07:12	32.5077		2018-11-14 05:07:08	1547
2018-11-14 05:07:17	32.4925		2018-11-14 05:07:13	1547.59
2018-11-14 05:07:22	32.4575		2018-11-14 05:07:18	1547.98
2018-11-14 05:07:27	32.3836		2018-11-14 05:07:23	1548.42
2018-11-14 05:07:32	32.27		2018-11-14 05:07:28	1548.69
2018-11-14 05:07:37	32.1586		2018-11-14 05:07:33	1548.48
2018-11-14 05:07:42	32.1135		2018-11-14 05:07:38	1547.95
2018-11-14 05:07:47	32.1726		2018-11-14 05:07:43	1547.74
2018-11-14 05:07:52	32.3248		2018-11-14 05:07:48	1548.41
2018-11-14 05:07:57	32.5341		2018-11-14 05:07:53	1550.19
2018-11-14 05:08:02	32.7703		2018-11-14 05:07:58	1552.92
2018-11-14 05:08:07	33.0134		2018-11-14 05:08:03	1555.99
2018-11-14 05:08:12	33.2481		2018-11-14 05:08:08	1558.57
2018-11-14 05:08:17	33.4742		2018-11-14 05:08:13	1560.04
2018-11-14 05:08:22	33.7092		2018-11-14 05:08:18	1560.4
2018-11-14 05:08:27	33.9576		2018-11-14 05:08:23	1560.1
2018-11-14 05:08:32	34.1813		2018-11-14 05:08:28	1559.47
2018-11-14 05:08:37	34.3171		2018-11-14 05:08:33	1558.63
2018-11-14 05:08:42	34.3286		2018-11-14 05:08:38	1557.68
2018-11-14 05:08:47	34.2428		2018-11-14 05:08:43	1557.02
2018-11-14 05:08:52	34.1365		2018-11-14 05:08:48	1557.1
2018-11-14 05:08:57	34.0826		2018-11-14 05:08:53	1557.86
2018-11-14 05:09:02	34.0948		2018-11-14 05:08:58	1558.75
2018-11-14 05:09:07	34.1256		2018-11-14 05:09:03	1559.3
2018-11-14 05:09:12	34.1164		2018-11-14 05:09:08	1559.65
2018-11-14 05:09:17	34.0473		2018-11-14 05:09:13	1560.35
2018-11-14 05:09:22	33.9385		2018-11-14 05:09:18	1561.69
2018-11-14 05:09:27	33.821		2018-11-14 05:09:23	1563.57
2018-11-14 05:09:32	33.7144		2018-11-14 05:09:28	1565.82
2018-11-14 05:09:37	33.6267		2018-11-14 05:09:33	1568.3
2018-11-14 05:09:42	33.5629		2018-11-14 05:09:38	1570.89
2018-11-14 05:09:47	33.5264		2018-11-14 05:09:43	1573.4
2018-11-14 05:09:52	33.5113		2018-11-14 05:09:48	1575.75
2018-11-14 05:09:57	33.4987		2018-11-14 05:09:53	1578
2018-11-14 05:10:02	33.4667		2018-11-14 05:09:59	1580.2
2018-11-14 05:10:07	33.407		2018-11-14 05:10:04	1582.16
2018-11-14 05:10:12	33.3275		2018-11-14 05:10:09	1583.62
2018-11-14 05:10:18	33.2429		2018-11-14 05:10:14	1584.45
2018-11-14 05:10:23	33.1731		2018-11-14 05:10:19	1584.85
2018-11-14 05:10:28	33.1488		2018-11-14 05:10:24	1585.15
2018-11-14 05:10:33	33.1959		2018-11-14 05:10:29	1585.55
2018-11-14 05:10:38	33.3021		2018-11-14 05:10:34	1586.04
2018-11-14 05:10:43	33.4126		2018-11-14 05:10:39	1586.62
2018-11-14 05:10:48	33.4618		2018-11-14 05:10:44	1587.46
2018-11-14 05:10:53	33.4125		2018-11-14 05:10:49	1588.76
2018-11-14 05:10:58	33.2805		2018-11-14 05:10:54	1590.41
2018-11-14 05:11:03	33.1345		2018-11-14 05:10:59	1591.98
2018-11-14 05:11:08	33.0572		2018-11-14 05:11:04	1593.06
2018-11-14 05:11:13	33.0862		2018-11-14 05:11:09	1593.62
2018-11-14 05:11:18	33.1924		2018-11-14 05:11:14	1593.85
2018-11-14 05:11:23	33.3117		2018-11-14 05:11:19	1593.82
2018-11-14 05:11:28	33.39		2018-11-14 05:11:24	1593.58
2018-11-14 05:11:33	33.4132		2018-11-14 05:11:29	1593.24
2018-11-14 05:11:38	33.4114		2018-11-14 05:11:34	1592.9
2018-11-14 05:11:43	33.4282		2018-11-14 05:11:39	1592.55
2018-11-14 05:11:48	33.4858		2018-11-14 05:11:44	1592.19
2018-11-14 05:11:53	33.5817		2018-11-14 05:11:49	1591.78
2018-11-14 05:11:58	33.7016		2018-11-14 05:11:54	1591.26
2018-11-14 05:12:03	33.8149		2018-11-14 05:11:59	1590.71
2018-11-14 05:12:08	33.8747		2018-11-14 05:12:04	1590.48
2018-11-14 05:12:13	33.8456		2018-11-14 05:12:09	1590.94
2018-11-14 05:12:18	33.7295		2018-11-14 05:12:14	1592.12
2018-11-14 05:12:23	33.5621		2018-11-14 05:12:19	1593.76
2018-11-14 05:12:28	33.3929		2018-11-14 05:12:24	1595.55
2018-11-14 05:12:33	33.2705		2018-11-14 05:12:29	1597.09
2018-11-14 05:12:38	33.2277		2018-11-14 05:12:34	1597.94
2018-11-14 05:12:43	33.2705		2018-11-14 05:12:39	1597.77
2018-11-14 05:12:48	33.3814		2018-11-14 05:12:44	1596.71
2018-11-14 05:12:53	33.5362		2018-11-14 05:12:49	1595.27
2018-11-14 05:12:58	33.7181		2018-11-14 05:12:54	1594.16
2018-11-14 05:13:03	33.918		2018-11-14 05:12:59	1593.84
2018-11-14 05:13:08	34.123		2018-11-14 05:13:04	1594.43
2018-11-14 05:13:13	34.31		2018-11-14 05:13:09	1595.87
2018-11-14 05:13:18	34.4578		2018-11-14 05:13:15	1598.16
2018-11-14 05:13:23	34.5589		2018-11-14 05:13:20	1601.3
2018-11-14 05:13:28	34.6094		2018-11-14 05:13:25	1604.95
2018-11-14 05:13:33	34.5907		2018-11-14 05:13:30	1608.58
2018-11-14 05:13:38	34.4783		2018-11-14 05:13:35	1611.93
2018-11-14 05:13:44	34.2726		2018-11-14 05:13:40	1614.98
2018-11-14 05:13:49	34.0144		2018-11-14 05:13:45	1617.77
2018-11-14 05:13:54	33.7646		2018-11-14 05:13:50	1620.22
2018-11-14 05:13:59	33.5648		2018-11-14 05:13:55	1622.26
2018-11-14 05:14:04	33.4114		2018-11-14 05:14:00	1624.01
2018-11-14 05:14:09	33.2689		2018-11-14 05:14:05	1625.9
2018-11-14 05:14:14	33.1112		2018-11-14 05:14:10	1628.5
2018-11-14 05:14:19	32.9468		2018-11-14 05:14:15	1631.96
2018-11-14 05:14:24	32.8059		2018-11-14 05:14:20	1636
2018-11-14 05:14:29	32.7131		2018-11-14 05:14:25	1640.36
2018-11-14 05:14:34	32.6741		2018-11-14 05:14:30	1644.94
2018-11-14 05:14:39	32.6759		2018-11-14 05:14:35	1649.59
2018-11-14 05:14:44	32.6958		2018-11-14 05:14:40	1653.84
2018-11-14 05:14:49	32.7163		2018-11-14 05:14:45	1657.25
2018-11-14 05:14:54	32.7376		2018-11-14 05:14:50	1659.73
2018-11-14 05:14:59	32.7757		2018-11-14 05:14:55	1661.37
2018-11-14 05:15:04	32.8481		2018-11-14 05:15:00	1662.17
2018-11-14 05:15:09	32.9571		2018-11-14 05:15:05	1662.08
2018-11-14 05:15:14	33.0806		2018-11-14 05:15:10	1661.36
2018-11-14 05:15:19	33.1813		2018-11-14 05:15:15	1660.7
2018-11-14 05:15:24	33.229		2018-11-14 05:15:20	1660.62
2018-11-14 05:15:29	33.2152		2018-11-14 05:15:25	1661.11
2018-11-14 05:15:34	33.1456		2018-11-14 05:15:30	1661.81
2018-11-14 05:15:39	33.0292		2018-11-14 05:15:35	1662.34
2018-11-14 05:15:44	32.8818		2018-11-14 05:15:40	1662.46
2018-11-14 05:15:49	32.7311		2018-11-14 05:15:45	1662.17
2018-11-14 05:15:54	32.6074		2018-11-14 05:15:50	1661.75
2018-11-14 05:15:59	32.5258		2018-11-14 05:15:55	1661.67
2018-11-14 05:16:04	32.4821		2018-11-14 05:16:00	1662.36
2018-11-14 05:16:09	32.4685		2018-11-14 05:16:05	1664.02
2018-11-14 05:16:14	32.4815		2018-11-14 05:16:11	1666.41
2018-11-14 05:16:19	32.5086		2018-11-14 05:16:16	1668.96
2018-11-14 05:16:24	32.5209		2018-11-14 05:16:21	1671.05
2018-11-14 05:16:29	32.4938		2018-11-14 05:16:26	1672.33
2018-11-14 05:16:34	32.4321		2018-11-14 05:16:31	1672.7
2018-11-14 05:16:39	32.3618		2018-11-14 05:16:36	1672.22
2018-11-14 05:16:44	32.2964		2018-11-14 05:16:41	1671.04
2018-11-14 05:16:49	32.2279		2018-11-14 05:16:46	1669.18
2018-11-14 05:16:54	32.1572		2018-11-14 05:16:51	1666.73
2018-11-14 05:16:59	32.1177		2018-11-14 05:16:56	1664.08
2018-11-14 05:17:04	32.152		2018-11-14 05:17:01	1661.84
2018-11-14 05:17:09	32.262		2018-11-14 05:17:06	1660.35
2018-11-14 05:17:15	32.3918		2018-11-14 05:17:11	1659.6
2018-11-14 05:17:20	32.4693		2018-11-14 05:17:16	1659.26
2018-11-14 05:17:25	32.4609		2018-11-14 05:17:21	1658.9
2018-11-14 05:17:30	32.38		2018-11-14 05:17:26	1658.28
2018-11-14 05:17:35	32.2533		2018-11-14 05:17:31	1657.54
2018-11-14 05:17:40	32.096		2018-11-14 05:17:36	1656.91
2018-11-14 05:17:45	31.9207		2018-11-14 05:17:41	1656.39
2018-11-14 05:17:50	31.7503		2018-11-14 05:17:46	1655.76
2018-11-14 05:17:55	31.605		2018-11-14 05:17:51	1654.84
2018-11-14 05:18:00	31.4812		2018-11-14 05:17:56	1653.74
2018-11-14 05:18:05	31.36		2018-11-14 05:18:01	1652.88
2018-11-14 05:18:10	31.2394		2018-11-14 05:18:06	1652.8
2018-11-14 05:18:15	31.1446		2018-11-14 05:18:11	1653.77
2018-11-14 05:18:20	31.1025		2018-11-14 05:18:16	1655.68
2018-11-14 05:18:25	31.1159		2018-11-14 05:18:21	1658.33
2018-11-14 05:18:30	31.1617		2018-11-14 05:18:26	1661.49
2018-11-14 05:18:35	31.2087		2018-11-14 05:18:31	1664.92
2018-11-14 05:18:40	31.2374		2018-11-14 05:18:36	1668.26
2018-11-14 05:18:45	31.2594		2018-11-14 05:18:41	1671.24
2018-11-14 05:18:50	31.3144		2018-11-14 05:18:46	1673.65
2018-11-14 05:18:55	31.4381		2018-11-14 05:18:51	1675.43
2018-11-14 05:19:00	31.6292		2018-11-14 05:18:56	1676.59
2018-11-14 05:19:05	31.8482		2018-11-14 05:19:02	1677.35
2018-11-14 05:19:10	32.045		2018-11-14 05:19:07	1677.86
2018-11-14 05:19:15	32.187		2018-11-14 05:19:12	1678.07
2018-11-14 05:19:20	32.2708		2018-11-14 05:19:17	1677.96
2018-11-14 05:19:25	32.3169		2018-11-14 05:19:22	1677.77
2018-11-14 05:19:30	32.3538		2018-11-14 05:19:27	1677.81
2018-11-14 05:19:35	32.4025		2018-11-14 05:19:32	1677.93
2018-11-14 05:19:40	32.4646		2018-11-14 05:19:37	1677.56
2018-11-14 05:19:45	32.5216		2018-11-14 05:19:42	1676.49
2018-11-14 05:19:50	32.5514		2018-11-14 05:19:47	1675.23
2018-11-14 05:19:55	32.5484		2018-11-14 05:19:52	1674.62
2018-11-14 05:20:00	32.5222		2018-11-14 05:19:57	1675.16
2018-11-14 05:20:05	32.4767		2018-11-14 05:20:02	1676.76
2018-11-14 05:20:10	32.4037		2018-11-14 05:20:07	1678.91
2018-11-14 05:20:15	32.3004		2018-11-14 05:20:12	1681.07
2018-11-14 05:20:20	32.1844		2018-11-14 05:20:17	1682.86
2018-11-14 05:20:25	32.085		2018-11-14 05:20:22	1684.15
2018-11-14 05:20:30	32.0217		2018-11-14 05:20:27	1684.74
2018-11-14 05:20:35	31.9867		2018-11-14 05:20:32	1684.32
2018-11-14 05:20:40	31.9519		2018-11-14 05:20:37	1682.75
2018-11-14 05:20:45	31.8947		2018-11-14 05:20:42	1680.31
2018-11-14 05:20:50	31.8156		2018-11-14 05:20:47	1677.56
2018-11-14 05:20:55	31.7317		2018-11-14 05:20:52	1675.04
2018-11-14 05:21:01	31.6665		2018-11-14 05:20:57	1673.1
2018-11-14 05:21:06	31.653		2018-11-14 05:21:02	1671.97
2018-11-14 05:21:11	31.7328		2018-11-14 05:21:07	1671.9
2018-11-14 05:21:16	31.9218		2018-11-14 05:21:12	1673.04
2018-11-14 05:21:21	32.1754		2018-11-14 05:21:17	1675.05
2018-11-14 05:21:26	32.4081		2018-11-14 05:21:22	1677.19
2018-11-14 05:21:31	32.5604		2018-11-14 05:21:27	1678.79
2018-11-14 05:21:36	32.6391		2018-11-14 05:21:32	1679.86
2018-11-14 05:21:41	32.6885		2018-11-14 05:21:37	1680.98
2018-11-14 05:21:46	32.7376		2018-11-14 05:21:42	1682.67
2018-11-14 05:21:51	32.789		2018-11-14 05:21:47	1684.93
2018-11-14 05:21:56	32.8466		2018-11-14 05:21:52	1687.3
2018-11-14 05:22:01	32.9288		2018-11-14 05:21:57	1689.44
2018-11-14 05:22:06	33.0503		2018-11-14 05:22:02	1691.25
2018-11-14 05:22:11	33.2043		2018-11-14 05:22:08	1692.71
2018-11-14 05:22:16	33.3675		2018-11-14 05:22:13	1693.9
2018-11-14 05:22:21	33.519		2018-11-14 05:22:18	1695.29
2018-11-14 05:22:26	33.6578		2018-11-14 05:22:23	1697.73
2018-11-14 05:22:31	33.8019		2018-11-14 05:22:28	1701.78
2018-11-14 05:22:36	33.9666		2018-11-14 05:22:33	1706.94
2018-11-14 05:22:41	34.1465		2018-11-14 05:22:38	1711.97
2018-11-14 05:22:46	34.3192		2018-11-14 05:22:43	1715.69
2018-11-14 05:22:51	34.4545		2018-11-14 05:22:48	1717.78
2018-11-14 05:22:56	34.5182		2018-11-14 05:22:53	1718.66
2018-11-14 05:23:01	34.4869		2018-11-14 05:22:58	1719.07
2018-11-14 05:23:06	34.374		2018-11-14 05:23:03	1719.67
2018-11-14 05:23:11	34.2254		2018-11-14 05:23:08	1720.78
2018-11-14 05:23:16	34.0813		2018-11-14 05:23:13	1722.16
2018-11-14 05:23:21	33.9553		2018-11-14 05:23:18	1723.23
2018-11-14 05:23:26	33.8549		2018-11-14 05:23:23	1723.61
2018-11-14 05:23:31	33.7944		2018-11-14 05:23:28	1723.64
2018-11-14 05:23:36	33.7765		2018-11-14 05:23:33	1724.21
2018-11-14 05:23:41	33.7776		2018-11-14 05:23:38	1725.94
2018-11-14 05:23:46	33.7654		2018-11-14 05:23:43	1728.76
2018-11-14 05:23:51	33.726		2018-11-14 05:23:48	1732.03
2018-11-14 05:23:56	33.6676		2018-11-14 05:23:53	1734.97
2018-11-14 05:24:01	33.5993		2018-11-14 05:23:58	1737
2018-11-14 05:24:06	33.5148		2018-11-14 05:24:03	1738.08
2018-11-14 05:24:11	33.4053		2018-11-14 05:24:08	1738.58
2018-11-14 05:24:16	33.2815		2018-11-14 05:24:13	1738.85
2018-11-14 05:24:21	33.1669		2018-11-14 05:24:18	1739.04
2018-11-14 05:24:26	33.07		2018-11-14 05:24:23	1739.14
2018-11-14 05:24:31	32.9817		2018-11-14 05:24:28	1739.23
2018-11-14 05:24:37	32.8965		2018-11-14 05:24:33	1739.5
2018-11-14 05:24:42	32.823		2018-11-14 05:24:38	1740.26
2018-11-14 05:24:47	32.7719		2018-11-14 05:24:43	1741.72
2018-11-14 05:24:52	32.7394		2018-11-14 05:24:48	1743.87
2018-11-14 05:24:57	32.706		2018-11-14 05:24:53	1746.31
2018-11-14 05:25:02	32.6524		2018-11-14 05:24:59	1748.44
2018-11-14 05:25:07	32.5836		2018-11-14 05:25:04	1749.99
2018-11-14 05:25:12	32.5353		2018-11-14 05:25:09	1751.34
2018-11-14 05:25:17	32.5443		2018-11-14 05:25:14	1753.09
2018-11-14 05:25:22	32.613		2018-11-14 05:25:24	1755.26
2018-11-14 05:25:27	32.7089		2018-11-14 05:25:29	1757.13
2018-11-14 05:25:32	32.8005		2018-11-14 05:25:34	1757.88
2018-11-14 05:25:37	32.8827		2018-11-14 05:25:39	1757.52
2018-11-14 05:25:42	32.9607		2018-11-14 05:25:44	1756.95
2018-11-14 05:25:47	33.0186		2018-11-14 05:25:49	1757.09
2018-11-14 05:25:52	33.0207		2018-11-14 05:25:54	1758.12
2018-11-14 05:25:57	32.9471		2018-11-14 05:25:59	1759.69
2018-11-14 05:26:02	32.8242		2018-11-14 05:26:04	1761.46
2018-11-14 05:26:07	32.7055		2018-11-14 05:26:09	1763.26
2018-11-14 05:26:12	32.6195		2018-11-14 05:26:14	1764.93
2018-11-14 05:26:17	32.5491		2018-11-14 05:26:19	1766.42
2018-11-14 05:26:22	32.473		2018-11-14 05:26:24	1767.94
2018-11-14 05:26:27	32.4122		2018-11-14 05:26:29	1769.76
2018-11-14 05:26:32	32.4192		2018-11-14 05:26:34	1771.98
2018-11-14 05:26:37	32.5289		2018-11-14 05:26:39	1774.36
2018-11-14 05:26:42	32.7285		2018-11-14 05:26:44	1776.56
2018-11-14 05:26:47	32.9617		2018-11-14 05:26:49	1778.29
2018-11-14 05:26:52	33.1574		2018-11-14 05:26:54	1779.42
2018-11-14 05:26:57	33.2698		2018-11-14 05:26:59	1780.01
2018-11-14 05:27:02	33.3		2018-11-14 05:27:04	1780.16
2018-11-14 05:27:07	33.2778		2018-11-14 05:27:09	1780.1
2018-11-14 05:27:12	33.2253		2018-11-14 05:27:14	1780.23
2018-11-14 05:27:17	33.1559		2018-11-14 05:27:19	1780.79
2018-11-14 05:27:22	33.1034		2018-11-14 05:27:24	1781.69
2018-11-14 05:27:27	33.1244		2018-11-14 05:27:29	1782.65
2018-11-14 05:27:32	33.2558		2018-11-14 05:27:34	1783.66
2018-11-14 05:27:37	33.4808		2018-11-14 05:27:39	1784.86
2018-11-14 05:27:42	33.7425		2018-11-14 05:27:44	1786.17
2018-11-14 05:27:47	33.9827		2018-11-14 05:27:49	1787.36
2018-11-14 05:27:52	34.1684		2018-11-14 05:27:55	1788.35
2018-11-14 05:27:57	34.3037		2018-11-14 05:28:00	1789.46
2018-11-14 05:28:02	34.4201		2018-11-14 05:28:05	1791.09
2018-11-14 05:28:07	34.5434		2018-11-14 05:28:10	1793.16
2018-11-14 05:28:13	34.6597		2018-11-14 05:28:15	1795.22
2018-11-14 05:28:18	34.7212		2018-11-14 05:28:20	1796.92
2018-11-14 05:28:23	34.6913		2018-11-14 05:28:25	1798.39
2018-11-14 05:28:28	34.5829		2018-11-14 05:28:30	1799.86
2018-11-14 05:28:33	34.4545		2018-11-14 05:28:35	1801.33
2018-11-14 05:28:38	34.3696		2018-11-14 05:28:40	1802.78
2018-11-14 05:28:43	34.3526		2018-11-14 05:28:45	1804.42
2018-11-14 05:28:48	34.3774		2018-11-14 05:28:50	1806.31
2018-11-14 05:28:53	34.3968		2018-11-14 05:28:55	1808.17
2018-11-14 05:28:58	34.3805		2018-11-14 05:29:00	1809.73
2018-11-14 05:29:03	34.3315		2018-11-14 05:29:05	1811.13
2018-11-14 05:29:08	34.2821		2018-11-14 05:29:10	1812.65
2018-11-14 05:29:13	34.2779		2018-11-14 05:29:15	1814.33
2018-11-14 05:29:18	34.3497		2018-11-14 05:29:20	1815.96
2018-11-14 05:29:23	34.4905		2018-11-14 05:29:25	1817.44
2018-11-14 05:29:28	34.6616		2018-11-14 05:29:30	1818.84
2018-11-14 05:29:33	34.8219		2018-11-14 05:29:35	1820.33
2018-11-14 05:29:38	34.9497		2018-11-14 05:29:40	1821.82
2018-11-14 05:29:43	35.0484		2018-11-14 05:29:45	1823.02
2018-11-14 05:29:48	35.1453		2018-11-14 05:29:50	1823.84
2018-11-14 05:29:53	35.2758		2018-11-14 05:29:55	1824.81
2018-11-14 05:29:58	35.4513		2018-11-14 05:30:00	1826.79
2018-11-14 05:30:03	35.6379		2018-11-14 05:30:05	1830.35
2018-11-14 05:30:08	35.7717		2018-11-14 05:30:10	1835.38
2018-11-14 05:30:13	35.803		2018-11-14 05:30:15	1841.13
2018-11-14 05:30:18	35.7298		2018-11-14 05:30:20	1846.44
2018-11-14 05:30:23	35.5881		2018-11-14 05:30:25	1850.3
2018-11-14 05:30:28	35.4117		2018-11-14 05:30:30	1852.41
2018-11-14 05:30:33	35.2158		2018-11-14 05:30:35	1853.42
2018-11-14 05:30:38	35.0236		2018-11-14 05:30:40	1854.27
2018-11-14 05:30:43	34.8909		2018-11-14 05:30:45	1855.26
2018-11-14 05:30:48	34.8839		2018-11-14 05:30:50	1855.99
2018-11-14 05:30:53	35.0261		2018-11-14 05:30:55	1856.12
2018-11-14 05:30:58	35.2717		2018-11-14 05:31:01	1855.98
2018-11-14 05:31:03	35.5403		2018-11-14 05:31:06	1856.28
2018-11-14 05:31:08	35.7704		2018-11-14 05:31:11	1857.53
2018-11-14 05:31:13	35.94		2018-11-14 05:31:16	1859.54
2018-11-14 05:31:18	36.0511		2018-11-14 05:31:21	1861.71
2018-11-14 05:31:23	36.1065		2018-11-14 05:31:26	1863.54
2018-11-14 05:31:28	36.1086		2018-11-14 05:31:31	1864.86
2018-11-14 05:31:33	36.0781		2018-11-14 05:31:36	1865.68
2018-11-14 05:31:38	36.0573		2018-11-14 05:31:41	1866.11
2018-11-14 05:31:43	36.0795		2018-11-14 05:31:46	1866.52
2018-11-14 05:31:49	36.135		2018-11-14 05:31:51	1867.58
2018-11-14 05:31:54	36.1754		2018-11-14 05:31:56	1869.81
2018-11-14 05:31:59	36.1537		2018-11-14 05:32:01	1873.11
2018-11-14 05:32:04	36.0562		2018-11-14 05:32:06	1876.94
2018-11-14 05:32:09	35.898		2018-11-14 05:32:11	1880.73
2018-11-14 05:32:14	35.7053		2018-11-14 05:32:16	1884.1
2018-11-14 05:32:19	35.5118		2018-11-14 05:32:21	1886.86
2018-11-14 05:32:24	35.3535		2018-11-14 05:32:26	1888.77
2018-11-14 05:32:29	35.2425		2018-11-14 05:32:31	1889.66
2018-11-14 05:32:34	35.1437		2018-11-14 05:32:36	1889.7
2018-11-14 05:32:39	34.9941		2018-11-14 05:32:41	1889.43
2018-11-14 05:32:44	34.7556		2018-11-14 05:32:46	1889.47
2018-11-14 05:32:49	34.454		2018-11-14 05:32:51	1890.2
2018-11-14 05:32:54	34.1684		2018-11-14 05:32:56	1891.6
2018-11-14 05:32:59	33.9799		2018-11-14 05:33:01	1893.4
2018-11-14 05:33:04	33.9175		2018-11-14 05:33:06	1895.38
2018-11-14 05:33:09	33.9433		2018-11-14 05:33:11	1897.52
2018-11-14 05:33:14	33.9904		2018-11-14 05:33:16	1899.8
2018-11-14 05:33:19	34.0141		2018-11-14 05:33:21	1902.06
2018-11-14 05:33:24	34.004		2018-11-14 05:33:26	1903.94
2018-11-14 05:33:29	33.9584		2018-11-14 05:33:31	1905.09
2018-11-14 05:33:34	33.8722		2018-11-14 05:33:36	1905.39
2018-11-14 05:33:39	33.7528		2018-11-14 05:33:41	1905.19
2018-11-14 05:33:44	33.6284		2018-11-14 05:33:46	1905.02
2018-11-14 05:33:49	33.5285		2018-11-14 05:33:51	1904.83
2018-11-14 05:33:54	33.4641		2018-11-14 05:33:56	1903.99
2018-11-14 05:33:59	33.4365		2018-11-14 05:34:02	1902.07
2018-11-14 05:34:04	33.4561		2018-11-14 05:34:07	1899.25
2018-11-14 05:34:09	33.5409		2018-11-14 05:34:12	1896.14
2018-11-14 05:34:14	33.6928		2018-11-14 05:34:17	1893.37
2018-11-14 05:34:19	33.8854		2018-11-14 05:34:22	1891.29
2018-11-14 05:34:24	34.0775		2018-11-14 05:34:27	1889.95
2018-11-14 05:34:29	34.2353		2018-11-14 05:34:32	1889.4
2018-11-14 05:34:34	34.3436		2018-11-14 05:34:37	1889.68
2018-11-14 05:34:39	34.4113		2018-11-14 05:34:42	1890.55
2018-11-14 05:34:44	34.4692		2018-11-14 05:34:47	1891.44
2018-11-14 05:34:49	34.5512		2018-11-14 05:34:52	1891.84
2018-11-14 05:34:54	34.6637		2018-11-14 05:34:57	1891.51
2018-11-14 05:34:59	34.7777		2018-11-14 05:35:02	1890.63
2018-11-14 05:35:04	34.8541		2018-11-14 05:35:07	1889.75
2018-11-14 05:35:09	34.8726		2018-11-14 05:35:12	1889.54
2018-11-14 05:35:15	34.837		2018-11-14 05:35:17	1890.38
2018-11-14 05:35:20	34.7622		2018-11-14 05:35:22	1892
2018-11-14 05:35:25	34.6698		2018-11-14 05:35:27	1893.53
2018-11-14 05:35:30	34.5897		2018-11-14 05:35:32	1894.13
2018-11-14 05:35:35	34.5468		2018-11-14 05:35:37	1893.4
2018-11-14 05:35:40	34.5359		2018-11-14 05:35:42	1891.3
2018-11-14 05:35:45	34.5188		2018-11-14 05:35:47	1888.04
2018-11-14 05:35:50	34.4542		2018-11-14 05:35:52	1884.27
2018-11-14 05:35:55	34.328		2018-11-14 05:35:57	1881.07
2018-11-14 05:36:00	34.1566		2018-11-14 05:36:02	1879.37
2018-11-14 05:36:05	33.979		2018-11-14 05:36:07	1879.43
2018-11-14 05:36:10	33.8457		2018-11-14 05:36:12	1880.68
2018-11-14 05:36:15	33.796		2018-11-14 05:36:17	1882.22
2018-11-14 05:36:20	33.831		2018-11-14 05:36:22	1883.31
2018-11-14 05:36:25	33.9182		2018-11-14 05:36:27	1883.87
2018-11-14 05:36:30	34.0293		2018-11-14 05:36:32	1884.31
2018-11-14 05:36:35	34.1627		2018-11-14 05:36:37	1885.24
2018-11-14 05:36:40	34.3229		2018-11-14 05:36:42	1886.91
2018-11-14 05:36:45	34.4984		2018-11-14 05:36:47	1888.83
2018-11-14 05:36:50	34.6737		2018-11-14 05:36:52	1890.09
2018-11-14 05:36:55	34.8466		2018-11-14 05:36:57	1890.16
2018-11-14 05:37:00	35.0177		2018-11-14 05:37:02	1889.34
2018-11-14 05:37:05	35.172		2018-11-14 05:37:08	1888.19
2018-11-14 05:37:10	35.2862		2018-11-14 05:37:13	1886.99
2018-11-14 05:37:15	35.3484		2018-11-14 05:37:18	1885.95
2018-11-14 05:37:20	35.358		2018-11-14 05:37:23	1885.22
2018-11-14 05:37:25	35.3224		2018-11-14 05:37:28	1884.58
2018-11-14 05:37:30	35.2666		2018-11-14 05:37:33	1883.54
2018-11-14 05:37:35	35.2303		2018-11-14 05:37:38	1882.1
2018-11-14 05:37:40	35.2325		2018-11-14 05:37:43	1880.93
2018-11-14 05:37:45	35.2476		2018-11-14 05:37:48	1880.49
2018-11-14 05:37:50	35.2394		2018-11-14 05:37:53	1880.56
2018-11-14 05:37:55	35.2194		2018-11-14 05:37:58	1880.7
2018-11-14 05:38:00	35.2475		2018-11-14 05:38:03	1880.86
2018-11-14 05:38:05	35.3581		2018-11-14 05:38:08	1881.28
2018-11-14 05:38:10	35.5065		2018-11-14 05:38:13	1882.25
2018-11-14 05:38:15	35.6063		2018-11-14 05:38:18	1883.8
2018-11-14 05:38:20	35.6068		2018-11-14 05:38:23	1885.71
2018-11-14 05:38:25	35.5202		2018-11-14 05:38:28	1887.65
2018-11-14 05:38:30	35.3932		2018-11-14 05:38:33	1889.39
2018-11-14 05:38:35	35.2714		2018-11-14 05:38:38	1890.77
2018-11-14 05:38:40	35.1839		2018-11-14 05:38:43	1891.73
2018-11-14 05:38:45	35.146		2018-11-14 05:38:48	1892.38
2018-11-14 05:38:51	35.169		2018-11-14 05:38:53	1893.11
2018-11-14 05:38:56	35.259		2018-11-14 05:38:58	1894.33
2018-11-14 05:39:01	35.3931		2018-11-14 05:39:03	1896.23
2018-11-14 05:39:06	35.5057		2018-11-14 05:39:08	1898.68
2018-11-14 05:39:11	35.5246		2018-11-14 05:39:13	1901.23
2018-11-14 05:39:16	35.4332		2018-11-14 05:39:18	1903.41
2018-11-14 05:39:21	35.2813		2018-11-14 05:39:23	1904.9
2018-11-14 05:39:26	35.1282		2018-11-14 05:39:28	1905.69
2018-11-14 05:39:31	34.9922		2018-11-14 05:39:33	1905.99
2018-11-14 05:39:36	34.8661		2018-11-14 05:39:38	1906.07
2018-11-14 05:39:41	34.7535		2018-11-14 05:39:43	1906.11
2018-11-14 05:39:46	34.6708		2018-11-14 05:39:48	1906.16
2018-11-14 05:39:51	34.623		2018-11-14 05:39:53	1906.33
2018-11-14 05:39:56	34.5913		2018-11-14 05:39:58	1906.99
2018-11-14 05:40:01	34.5475		2018-11-14 05:40:03	1908.48
2018-11-14 05:40:06	34.4798		2018-11-14 05:40:08	1910.73
2018-11-14 05:40:11	34.4052		2018-11-14 05:40:14	1913.13
2018-11-14 05:40:16	34.3513		2018-11-14 05:40:19	1914.98
2018-11-14 05:40:21	34.3238		2018-11-14 05:40:24	1915.99
2018-11-14 05:40:26	34.2981		2018-11-14 05:40:29	1916.46
2018-11-14 05:40:31	34.2446		2018-11-14 05:40:34	1916.92
2018-11-14 05:40:36	34.1545		2018-11-14 05:40:39	1917.56
2018-11-14 05:40:41	34.0424		2018-11-14 05:40:44	1917.97
2018-11-14 05:40:46	33.9315		2018-11-14 05:40:49	1917.32
2018-11-14 05:40:51	33.8329		2018-11-14 05:40:54	1915.07
2018-11-14 05:40:56	33.7317		2018-11-14 05:40:59	1911.46
2018-11-14 05:41:01	33.6		2018-11-14 05:41:04	1907.5
2018-11-14 05:41:06	33.436		2018-11-14 05:41:09	1904.37
2018-11-14 05:41:11	33.2851		2018-11-14 05:41:14	1902.85
2018-11-14 05:41:16	33.209		2018-11-14 05:41:19	1902.99
2018-11-14 05:41:21	33.2364		2018-11-14 05:41:24	1904.28
2018-11-14 05:41:26	33.3492		2018-11-14 05:41:29	1906.1
2018-11-14 05:41:31	33.5068		2018-11-14 05:41:34	1908.16
2018-11-14 05:41:36	33.6721		2018-11-14 05:41:39	1910.21
2018-11-14 05:41:41	33.8233		2018-11-14 05:41:44	1911.86
2018-11-14 05:41:46	33.9626		2018-11-14 05:41:49	1912.76
2018-11-14 05:41:51	34.1078		2018-11-14 05:41:54	1912.97
2018-11-14 05:41:56	34.2603		2018-11-14 05:41:59	1913.02
2018-11-14 05:42:01	34.3867		2018-11-14 05:42:04	1913.42
2018-11-14 05:42:06	34.4479		2018-11-14 05:42:09	1914.27
2018-11-14 05:42:11	34.4395		2018-11-14 05:42:14	1915.17
2018-11-14 05:42:16	34.3848		2018-11-14 05:42:19	1915.74
2018-11-14 05:42:21	34.2995		2018-11-14 05:42:24	1916.02
2018-11-14 05:42:27	34.1776		2018-11-14 05:42:29	1916.41
2018-11-14 05:42:32	34.013		2018-11-14 05:42:34	1917.34
2018-11-14 05:42:37	33.8211		2018-11-14 05:42:39	1918.99
2018-11-14 05:42:42	33.6346		2018-11-14 05:42:44	1921.28
2018-11-14 05:42:47	33.476		2018-11-14 05:42:49	1923.81
2018-11-14 05:42:52	33.3448		2018-11-14 05:42:54	1926.06
2018-11-14 05:42:57	33.2339		2018-11-14 05:42:59	1927.79
2018-11-14 05:43:02	33.1474		2018-11-14 05:43:04	1929.15
2018-11-14 05:43:07	33.0952		2018-11-14 05:43:09	1930.27
2018-11-14 05:43:12	33.0775		2018-11-14 05:43:15	1931.08
2018-11-14 05:43:17	33.0853		2018-11-14 05:43:20	1931.51
2018-11-14 05:43:22	33.1106		2018-11-14 05:43:25	1931.77
2018-11-14 05:43:27	33.1513		2018-11-14 05:43:30	1932.04
2018-11-14 05:43:32	33.2077		2018-11-14 05:43:35	1932.33
2018-11-14 05:43:37	33.2754		2018-11-14 05:43:40	1932.58
2018-11-14 05:43:42	33.344		2018-11-14 05:43:45	1932.9
2018-11-14 05:43:47	33.4046		2018-11-14 05:43:50	1933.42
2018-11-14 05:43:52	33.4605		2018-11-14 05:43:55	1934.05
2018-11-14 05:43:57	33.5262		2018-11-14 05:44:00	1934.53
2018-11-14 05:44:02	33.616		2018-11-14 05:44:05	1934.72
2018-11-14 05:44:07	33.7291		2018-11-14 05:44:10	1934.77
2018-11-14 05:44:12	33.842		2018-11-14 05:44:15	1935.07
2018-11-14 05:44:17	33.9136		2018-11-14 05:44:20	1935.9
2018-11-14 05:44:22	33.9147		2018-11-14 05:44:25	1937.18
2018-11-14 05:44:27	33.8601		2018-11-14 05:44:30	1938.41
2018-11-14 05:44:32	33.8009		2018-11-14 05:44:35	1939.06
2018-11-14 05:44:37	33.7793		2018-11-14 05:44:40	1939.34
2018-11-14 05:44:42	33.7957		2018-11-14 05:44:45	1940.25
2018-11-14 05:44:47	33.8179		2018-11-14 05:44:50	1942.54
2018-11-14 05:44:52	33.8111		2018-11-14 05:44:55	1945.77
2018-11-14 05:44:57	33.7623		2018-11-14 05:45:00	1948.91
2018-11-14 05:45:02	33.6829		2018-11-14 05:45:05	1951.36
2018-11-14 05:45:07	33.5895		2018-11-14 05:45:10	1953.12
2018-11-14 05:45:12	33.4916		2018-11-14 05:45:15	1954.28
2018-11-14 05:45:17	33.4011		2018-11-14 05:45:20	1954.72
2018-11-14 05:45:22	33.3413		2018-11-14 05:45:25	1954.45
2018-11-14 05:45:27	33.3341		2018-11-14 05:45:30	1953.8
2018-11-14 05:45:32	33.3839		2018-11-14 05:45:35	1953.12
2018-11-14 05:45:37	33.4851		2018-11-14 05:45:40	1952.38
2018-11-14 05:45:42	33.6331		2018-11-14 05:45:45	1951.28
2018-11-14 05:45:47	33.8149		2018-11-14 05:45:50	1949.65
2018-11-14 05:45:52	33.9981		2018-11-14 05:45:55	1947.69
2018-11-14 05:45:57	34.1489		2018-11-14 05:46:00	1945.77
2018-11-14 05:46:03	34.2553		2018-11-14 05:46:05	1944.17
2018-11-14 05:46:08	34.3251		2018-11-14 05:46:11	1943
2018-11-14 05:46:13	34.366		2018-11-14 05:46:16	1942.28
2018-11-14 05:46:18	34.3712		2018-11-14 05:46:21	1942.01
2018-11-14 05:46:23	34.3257		2018-11-14 05:46:26	1942.14
2018-11-14 05:46:28	34.2324		2018-11-14 05:46:31	1942.51
2018-11-14 05:46:33	34.1249		2018-11-14 05:46:36	1942.8
2018-11-14 05:46:38	34.0419		2018-11-14 05:46:41	1942.71
2018-11-14 05:46:43	33.9932		2018-11-14 05:46:46	1942.28
2018-11-14 05:46:48	33.965		2018-11-14 05:46:51	1941.82
2018-11-14 05:46:53	33.9492		2018-11-14 05:46:56	1941.53
2018-11-14 05:46:58	33.9504		2018-11-14 05:47:01	1941.26
2018-11-14 05:47:03	33.962		2018-11-14 05:47:06	1940.69
2018-11-14 05:47:08	33.9479		2018-11-14 05:47:11	1939.58
2018-11-14 05:47:13	33.8615		2018-11-14 05:47:16	1937.98
2018-11-14 05:47:18	33.6838		2018-11-14 05:47:21	1936.27
2018-11-14 05:47:23	33.4409		2018-11-14 05:47:26	1934.92
2018-11-14 05:47:28	33.1881		2018-11-14 05:47:31	1934.1
2018-11-14 05:47:33	32.9773		2018-11-14 05:47:36	1933.54
2018-11-14 05:47:38	32.8302		2018-11-14 05:47:41	1932.8
2018-11-14 05:47:43	32.7317		2018-11-14 05:47:46	1931.61
2018-11-14 05:47:48	32.6491		2018-11-14 05:47:51	1930.08
2018-11-14 05:47:53	32.5628		2018-11-14 05:47:56	1928.72
2018-11-14 05:47:58	32.4803		2018-11-14 05:48:01	1928.26
2018-11-14 05:48:03	32.4164		2018-11-14 05:48:06	1929.26
2018-11-14 05:48:08	32.366		2018-11-14 05:48:11	1931.85
2018-11-14 05:48:13	32.3094		2018-11-14 05:48:16	1935.63
2018-11-14 05:48:18	32.2456		2018-11-14 05:48:21	1939.93
2018-11-14 05:48:23	32.205		2018-11-14 05:48:26	1944.15
2018-11-14 05:48:28	32.2171		2018-11-14 05:48:31	1947.94
2018-11-14 05:48:33	32.2736		2018-11-14 05:48:36	1951.31
2018-11-14 05:48:38	32.3369		2018-11-14 05:48:41	1954.41
2018-11-14 05:48:43	32.3811		2018-11-14 05:48:46	1957.46
2018-11-14 05:48:48	32.409		2018-11-14 05:48:51	1960.5
2018-11-14 05:48:53	32.4317		2018-11-14 05:48:56	1963.36
2018-11-14 05:48:58	32.4439		2018-11-14 05:49:02	1965.8
2018-11-14 05:49:03	32.4279		2018-11-14 05:49:07	1967.55
2018-11-14 05:49:08	32.3712		2018-11-14 05:49:12	1968.28
2018-11-14 05:49:13	32.2694		2018-11-14 05:49:17	1967.81
2018-11-14 05:49:18	32.1264		2018-11-14 05:49:22	1966.47
2018-11-14 05:49:23	31.9719		2018-11-14 05:49:27	1964.97
2018-11-14 05:49:28	31.861		2018-11-14 05:49:32	1963.54
2018-11-14 05:49:34	31.825		2018-11-14 05:49:37	1961.75
2018-11-14 05:49:39	31.8366		2018-11-14 05:49:42	1959.21
2018-11-14 05:49:44	31.8562		2018-11-14 05:49:47	1956.31
2018-11-14 05:49:49	31.8943		2018-11-14 05:49:52	1953.98
2018-11-14 05:49:54	31.9906		2018-11-14 05:49:57	1952.92
2018-11-14 05:49:59	32.1493		2018-11-14 05:50:02	1953.13
2018-11-14 05:50:04	32.3282		2018-11-14 05:50:07	1954.01
2018-11-14 05:50:09	32.4795		2018-11-14 05:50:12	1954.93
2018-11-14 05:50:14	32.5692		2018-11-14 05:50:17	1955.6
2018-11-14 05:50:19	32.5701		2018-11-14 05:50:22	1955.97
2018-11-14 05:50:24	32.4684		2018-11-14 05:50:27	1955.97
2018-11-14 05:50:29	32.2878		2018-11-14 05:50:32	1955.35
2018-11-14 05:50:34	32.0878		2018-11-14 05:50:37	1953.78
2018-11-14 05:50:39	31.9243		2018-11-14 05:50:42	1951.05
2018-11-14 05:50:44	31.8131		2018-11-14 05:50:47	1947.42
2018-11-14 05:50:49	31.7338		2018-11-14 05:50:52	1943.74
2018-11-14 05:50:54	31.6565		2018-11-14 05:50:57	1940.84
2018-11-14 05:50:59	31.5623		2018-11-14 05:51:02	1938.84
2018-11-14 05:51:04	31.4528		2018-11-14 05:51:07	1937.32
2018-11-14 05:51:09	31.3446		2018-11-14 05:51:12	1936.1
2018-11-14 05:51:14	31.2599		2018-11-14 05:51:17	1935.56
2018-11-14 05:51:19	31.2205		2018-11-14 05:51:22	1936.27
2018-11-14 05:51:24	31.2401		2018-11-14 05:51:27	1938.55
2018-11-14 05:51:29	31.3105		2018-11-14 05:51:32	1942.16
2018-11-14 05:51:34	31.398		2018-11-14 05:51:37	1946.27
2018-11-14 05:51:39	31.465		2018-11-14 05:51:42	1949.78
2018-11-14 05:51:44	31.4963		2018-11-14 05:51:47	1952.07
2018-11-14 05:51:49	31.4994		2018-11-14 05:51:52	1953.24
2018-11-14 05:51:54	31.4869		2018-11-14 05:51:57	1953.63
2018-11-14 05:51:59	31.4728		2018-11-14 05:52:02	1953.36
2018-11-14 05:52:04	31.4765		2018-11-14 05:52:08	1952.49
2018-11-14 05:52:09	31.5068		2018-11-14 05:52:13	1951.2
2018-11-14 05:52:14	31.543		2018-11-14 05:52:18	1949.83
2018-11-14 05:52:19	31.5531		2018-11-14 05:52:23	1948.6
2018-11-14 05:52:24	31.5229		2018-11-14 05:52:28	1947.46
2018-11-14 05:52:29	31.4587		2018-11-14 05:52:33	1946.28
2018-11-14 05:52:34	31.3688		2018-11-14 05:52:38	1945.19
2018-11-14 05:52:39	31.2555		2018-11-14 05:52:43	1944.49
2018-11-14 05:52:44	31.1175		2018-11-14 05:52:48	1944.3
2018-11-14 05:52:49	30.9561		2018-11-14 05:52:53	1944.6
2018-11-14 05:52:54	30.7852		2018-11-14 05:52:58	1945.33
2018-11-14 05:52:59	30.635		2018-11-14 05:53:03	1946.21
2018-11-14 05:53:04	30.5452		2018-11-14 05:53:08	1946.74
2018-11-14 05:53:09	30.5448		2018-11-14 05:53:13	1946.68
2018-11-14 05:53:15	30.6279		2018-11-14 05:53:18	1946.41
2018-11-14 05:53:20	30.7456		2018-11-14 05:53:23	1946.62
2018-11-14 05:53:25	30.8317		2018-11-14 05:53:28	1947.62
2018-11-14 05:53:30	30.8519		2018-11-14 05:53:33	1949.03
2018-11-14 05:53:35	30.8274		2018-11-14 05:53:38	1950.15
2018-11-14 05:53:40	30.807		2018-11-14 05:53:43	1950.71
2018-11-14 05:53:45	30.8183		2018-11-14 05:53:48	1950.83
2018-11-14 05:53:50	30.8499		2018-11-14 05:53:53	1950.66
2018-11-14 05:53:55	30.8693		2018-11-14 05:53:58	1950.14
2018-11-14 05:54:00	30.8465		2018-11-14 05:54:03	1949.34
2018-11-14 05:54:05	30.7686		2018-11-14 05:54:08	1948.49
2018-11-14 05:54:10	30.6461		2018-11-14 05:54:13	1947.96
2018-11-14 05:54:15	30.5132		2018-11-14 05:54:18	1947.98
2018-11-14 05:54:20	30.4135		2018-11-14 05:54:23	1948.56
2018-11-14 05:54:25	30.376		2018-11-14 05:54:28	1949.37
2018-11-14 05:54:30	30.4038		2018-11-14 05:54:33	1950.09
2018-11-14 05:54:35	30.4907		2018-11-14 05:54:38	1950.6
2018-11-14 05:54:40	30.6418		2018-11-14 05:54:43	1951
2018-11-14 05:54:45	30.8626		2018-11-14 05:54:48	1951.37
2018-11-14 05:54:50	31.1256		2018-11-14 05:54:53	1951.63
2018-11-14 05:54:55	31.3692		2018-11-14 05:54:58	1951.54
2018-11-14 05:55:00	31.5439		2018-11-14 05:55:03	1950.95
2018-11-14 05:55:05	31.6479		2018-11-14 05:55:09	1950.08
2018-11-14 05:55:10	31.7055		2018-11-14 05:55:14	1949.49
2018-11-14 05:55:15	31.7241		2018-11-14 05:55:24	1949.72
2018-11-14 05:55:20	31.6958		2018-11-14 05:55:29	1950.94
2018-11-14 05:55:25	31.6332		2018-11-14 05:55:34	1952.76
2018-11-14 05:55:30	31.5766		2018-11-14 05:55:39	1954.5
2018-11-14 05:55:35	31.5567		2018-11-14 05:55:44	1955.79
2018-11-14 05:55:40	31.564		2018-11-14 05:55:49	1956.94
2018-11-14 05:55:45	31.5599		2018-11-14 05:55:54	1958.51
2018-11-14 05:55:50	31.517		2018-11-14 05:55:59	1960.57
2018-11-14 05:55:55	31.454		2018-11-14 05:56:04	1962.6
2018-11-14 05:56:00	31.431		2018-11-14 05:56:09	1964.13
2018-11-14 05:56:05	31.4976		2018-11-14 05:56:14	1965
2018-11-14 05:56:10	31.6404		2018-11-14 05:56:19	1965.09
2018-11-14 05:56:15	31.7884		2018-11-14 05:56:24	1964.21
2018-11-14 05:56:20	31.8667		2018-11-14 05:56:29	1962.26
2018-11-14 05:56:25	31.8393		2018-11-14 05:56:34	1959.52
2018-11-14 05:56:30	31.7171		2018-11-14 05:56:39	1956.45
2018-11-14 05:56:35	31.5436		2018-11-14 05:56:44	1953.5
2018-11-14 05:56:41	31.3756		2018-11-14 05:56:49	1951.14
2018-11-14 05:56:46	31.2652		2018-11-14 05:56:54	1949.75
2018-11-14 05:56:51	31.2427		2018-11-14 05:56:59	1949.2
2018-11-14 05:56:56	31.3003		2018-11-14 05:57:04	1948.8
2018-11-14 05:57:01	31.3992		2018-11-14 05:57:09	1947.75
2018-11-14 05:57:06	31.4996		2018-11-14 05:57:14	1945.75
2018-11-14 05:57:11	31.58		2018-11-14 05:57:19	1943
2018-11-14 05:57:16	31.631		2018-11-14 05:57:24	1940.03
2018-11-14 05:57:21	31.6528		2018-11-14 05:57:29	1937.46
2018-11-14 05:57:26	31.6617		2018-11-14 05:57:34	1935.62
2018-11-14 05:57:31	31.6783		2018-11-14 05:57:39	1934.32
2018-11-14 05:57:36	31.7045		2018-11-14 05:57:44	1933.11
2018-11-14 05:57:41	31.7286		2018-11-14 05:57:49	1931.8
2018-11-14 05:57:46	31.7506		2018-11-14 05:57:54	1930.49
2018-11-14 05:57:51	31.7826		2018-11-14 05:57:59	1929.3
2018-11-14 05:57:56	31.8268		2018-11-14 05:58:05	1928.21
2018-11-14 05:58:01	31.8683		2018-11-14 05:58:10	1927.18
2018-11-14 05:58:06	31.8958		2018-11-14 05:58:15	1926.16
2018-11-14 05:58:11	31.9121		2018-11-14 05:58:20	1925.08
2018-11-14 05:58:16	31.9292		2018-11-14 05:58:25	1923.82
2018-11-14 05:58:21	31.9741		2018-11-14 05:58:30	1922.4
2018-11-14 05:58:26	32.1018		2018-11-14 05:58:35	1921.05
2018-11-14 05:58:31	32.3657		2018-11-14 05:58:40	1920.1
2018-11-14 05:58:36	32.7591		2018-11-14 05:58:45	1919.87
2018-11-14 05:58:41	33.2119		2018-11-14 05:58:50	1920.44
2018-11-14 05:58:46	33.6603		2018-11-14 05:58:55	1921.78
2018-11-14 05:58:51	34.0969		2018-11-14 05:59:00	1923.87
2018-11-14 05:58:56	34.54		2018-11-14 05:59:05	1926.64
2018-11-14 05:59:01	34.9734		2018-11-14 05:59:10	1929.64
2018-11-14 05:59:06	35.334		2018-11-14 05:59:15	1932.27
2018-11-14 05:59:11	35.5594		2018-11-14 05:59:20	1934.19
2018-11-14 05:59:16	35.6357		2018-11-14 05:59:25	1935.42
2018-11-14 05:59:21	35.5961		2018-11-14 05:59:30	1936.07
2018-11-14 05:59:26	35.4878		2018-11-14 05:59:35	1936.26
2018-11-14 05:59:31	35.3499		2018-11-14 05:59:40	1936.2
2018-11-14 05:59:36	35.2148		2018-11-14 05:59:45	1936.06
2018-11-14 05:59:41	35.1079		2018-11-14 05:59:50	1935.87
2018-11-14 05:59:46	35.0485		2018-11-14 05:59:55	1935.68
2018-11-14 05:59:51	35.0595		2018-11-14 06:00:00	1935.67
2018-11-14 05:59:56	35.1638		2018-11-14 06:00:05	1936.05
2018-11-14 06:00:02	35.3489		2018-11-14 06:00:10	1936.88
2018-11-14 06:00:07	35.5502		2018-11-14 06:00:15	1938.07
2018-11-14 06:00:12	35.7003		2018-11-14 06:00:20	1939.37
2018-11-14 06:00:17	35.7873		2018-11-14 06:00:25	1940.33
2018-11-14 06:00:22	35.8413		2018-11-14 06:00:30	1940.56
2018-11-14 06:00:27	35.8799		2018-11-14 06:00:35	1940.13
2018-11-14 06:00:32	35.9013		2018-11-14 06:00:40	1939.45
2018-11-14 06:00:37	35.9243		2018-11-14 06:00:45	1938.84
2018-11-14 06:00:42	35.9964		2018-11-14 06:00:50	1938.38
2018-11-14 06:00:47	36.1456		2018-11-14 06:00:56	1938.26
2018-11-14 06:00:52	36.3374		2018-11-14 06:01:01	1938.79
2018-11-14 06:00:57	36.5008		2018-11-14 06:01:06	1940.16
2018-11-14 06:01:02	36.6		2018-11-14 06:01:11	1942.14
2018-11-14 06:01:07	36.6699		2018-11-14 06:01:16	1944.06
2018-11-14 06:01:12	36.7788		2018-11-14 06:01:21	1945.17
2018-11-14 06:01:17	36.9727		2018-11-14 06:01:26	1944.94
2018-11-14 06:01:22	37.2621		2018-11-14 06:01:31	1943.53
2018-11-14 06:01:27	37.6262		2018-11-14 06:01:36	1941.7
2018-11-14 06:01:32	37.9986		2018-11-14 06:01:41	1940.29
2018-11-14 06:01:37	38.2767		2018-11-14 06:01:46	1939.53
2018-11-14 06:01:42	38.4002		2018-11-14 06:01:51	1939.03
2018-11-14 06:01:47	38.4174		2018-11-14 06:01:56	1938.64
2018-11-14 06:01:52	38.4432		2018-11-14 06:02:01	1938.77
2018-11-14 06:01:57	38.5476		2018-11-14 06:02:06	1939.77
2018-11-14 06:02:02	38.6979		2018-11-14 06:02:11	1941.48
2018-11-14 06:02:07	38.811		2018-11-14 06:02:16	1943.41
2018-11-14 06:02:12	38.8509		2018-11-14 06:02:21	1945.34
2018-11-14 06:02:17	38.8582		2018-11-14 06:02:26	1947.05
2018-11-14 06:02:22	38.8848		2018-11-14 06:02:31	1948.02
2018-11-14 06:02:27	38.9272		2018-11-14 06:02:36	1947.51
2018-11-14 06:02:32	38.9436		2018-11-14 06:02:41	1945.2
2018-11-14 06:02:37	38.9143		2018-11-14 06:02:46	1941.53
2018-11-14 06:02:42	38.8667		2018-11-14 06:02:51	1937.44
2018-11-14 06:02:47	38.8457		2018-11-14 06:02:56	1933.84
2018-11-14 06:02:52	38.8715		2018-11-14 06:03:01	1931.26
2018-11-14 06:02:57	38.9253		2018-11-14 06:03:06	1929.89
2018-11-14 06:03:02	38.9641		2018-11-14 06:03:11	1929.82
2018-11-14 06:03:07	38.9407		2018-11-14 06:03:16	1931.11
2018-11-14 06:03:12	38.82		2018-11-14 06:03:21	1933.5
2018-11-14 06:03:17	38.6001		2018-11-14 06:03:26	1936.31
2018-11-14 06:03:22	38.3293		2018-11-14 06:03:31	1938.74
2018-11-14 06:03:27	38.0942		2018-11-14 06:03:36	1940.25
2018-11-14 06:03:32	37.9719		2018-11-14 06:03:41	1940.6
2018-11-14 06:03:37	37.9826		2018-11-14 06:03:46	1939.68
2018-11-14 06:03:43	38.0894		2018-11-14 06:03:52	1937.61
2018-11-14 06:03:48	38.2456		2018-11-14 06:03:57	1934.91
2018-11-14 06:03:53	38.4312		2018-11-14 06:04:02	1932.17
2018-11-14 06:03:58	38.6393		2018-11-14 06:04:07	1929.55
2018-11-14 06:04:03	38.8545		2018-11-14 06:04:12	1926.74
2018-11-14 06:04:08	39.0701		2018-11-14 06:04:17	1923.37
2018-11-14 06:04:13	39.3039		2018-11-14 06:04:22	1919.45
2018-11-14 06:04:18	39.5743		2018-11-14 06:04:27	1915.32
2018-11-14 06:04:23	39.8721		2018-11-14 06:04:32	1911.19
2018-11-14 06:04:28	40.1824		2018-11-14 06:04:37	1906.98
2018-11-14 06:04:33	40.5253		2018-11-14 06:04:42	1902.62
2018-11-14 06:04:38	40.938		2018-11-14 06:04:47	1898.34
2018-11-14 06:04:43	41.4078		2018-11-14 06:04:52	1894.54
2018-11-14 06:04:48	41.8517		2018-11-14 06:04:57	1891.64
2018-11-14 06:04:53	42.1811		2018-11-14 06:05:02	1889.79
2018-11-14 06:04:58	42.3692		2018-11-14 06:05:07	1888.72
2018-11-14 06:05:03	42.4575		2018-11-14 06:05:12	1887.78
2018-11-14 06:05:08	42.5157		2018-11-14 06:05:17	1886.44
2018-11-14 06:05:13	42.5929		2018-11-14 06:05:22	1884.74
2018-11-14 06:05:18	42.6942		2018-11-14 06:05:27	1883.41
2018-11-14 06:05:23	42.8052		2018-11-14 06:05:32	1883.3
2018-11-14 06:05:28	42.9356		2018-11-14 06:05:37	1884.48
2018-11-14 06:05:33	43.1206		2018-11-14 06:05:42	1886.01
2018-11-14 06:05:38	43.38		2018-11-14 06:05:47	1886.67
2018-11-14 06:05:43	43.6908		2018-11-14 06:05:52	1885.95
2018-11-14 06:05:48	43.9985		2018-11-14 06:05:57	1884.15
2018-11-14 06:05:53	44.2509		2018-11-14 06:06:02	1881.82
2018-11-14 06:05:58	44.434		2018-11-14 06:06:07	1879.4
2018-11-14 06:06:03	44.5835		2018-11-14 06:06:12	1877.18
2018-11-14 06:06:08	44.7452		2018-11-14 06:06:17	1875.35
2018-11-14 06:06:13	44.9182		2018-11-14 06:06:23	1873.82
2018-11-14 06:06:18	45.0488		2018-11-14 06:06:28	1872.33
2018-11-14 06:06:23	45.0828		2018-11-14 06:06:33	1870.71
2018-11-14 06:06:28	45.0233		2018-11-14 06:06:38	1868.87
2018-11-14 06:06:33	44.9519		2018-11-14 06:06:43	1866.71
2018-11-14 06:06:38	44.9927		2018-11-14 06:06:48	1864.14
2018-11-14 06:06:43	45.2315		2018-11-14 06:06:53	1861.46
2018-11-14 06:06:48	45.653		2018-11-14 06:06:58	1859.13
2018-11-14 06:06:53	46.1469		2018-11-14 06:07:03	1857.3
2018-11-14 06:06:58	46.5692		2018-11-14 06:07:08	1855.73
2018-11-14 06:07:03	46.8119		2018-11-14 06:07:13	1854.18
2018-11-14 06:07:14	46.8544		2018-11-14 06:07:18	1852.74
2018-11-14 06:07:19	46.7596		2018-11-14 06:07:23	1851.45
2018-11-14 06:07:24	46.6084		2018-11-14 06:07:28	1850.09
2018-11-14 06:07:29	46.4379		2018-11-14 06:07:33	1848.28
2018-11-14 06:07:34	46.2467		2018-11-14 06:07:38	1845.99
2018-11-14 06:07:39	46.0388		2018-11-14 06:07:43	1843.57
2018-11-14 06:07:44	45.8391		2018-11-14 06:07:48	1841.54
2018-11-14 06:07:49	45.6775		2018-11-14 06:07:53	1840.13
2018-11-14 06:07:54	45.5749		2018-11-14 06:07:58	1839.33
2018-11-14 06:07:59	45.538		2018-11-14 06:08:03	1839.24
2018-11-14 06:08:04	45.5521		2018-11-14 06:08:08	1840.04
2018-11-14 06:08:09	45.5839		2018-11-14 06:08:13	1841.53
2018-11-14 06:08:14	45.598		2018-11-14 06:08:18	1842.88
2018-11-14 06:08:19	45.5715		2018-11-14 06:08:23	1843.12
2018-11-14 06:08:24	45.4901		2018-11-14 06:08:28	1841.77
2018-11-14 06:08:29	45.343		2018-11-14 06:08:33	1839.16
2018-11-14 06:08:34	45.1456		2018-11-14 06:08:38	1836.09
2018-11-14 06:08:39	44.9738		2018-11-14 06:08:43	1833.3
2018-11-14 06:08:44	44.9352		2018-11-14 06:08:48	1831.17
2018-11-14 06:08:49	45.0725		2018-11-14 06:08:53	1829.68
2018-11-14 06:08:54	45.3226		2018-11-14 06:08:58	1828.6
2018-11-14 06:08:59	45.6021		2018-11-14 06:09:03	1827.55
2018-11-14 06:09:04	45.8978		2018-11-14 06:09:08	1826.27
2018-11-14 06:09:09	46.2476		2018-11-14 06:09:14	1824.77
2018-11-14 06:09:14	46.6696		2018-11-14 06:09:19	1823.41
2018-11-14 06:09:19	47.1389		2018-11-14 06:09:24	1822.75
2018-11-14 06:09:24	47.6094		2018-11-14 06:09:29	1823.11
2018-11-14 06:09:29	48.0377		2018-11-14 06:09:34	1824.1
2018-11-14 06:09:34	48.4		2018-11-14 06:09:39	1824.89
2018-11-14 06:09:39	48.6918		2018-11-14 06:09:44	1824.95
2018-11-14 06:09:44	48.9145		2018-11-14 06:09:49	1824.39
2018-11-14 06:09:49	49.0716		2018-11-14 06:09:54	1823.44
2018-11-14 06:09:54	49.1736		2018-11-14 06:09:59	1821.93
2018-11-14 06:09:59	49.2328		2018-11-14 06:10:04	1819.53
2018-11-14 06:10:04	49.2568		2018-11-14 06:10:09	1816.38
2018-11-14 06:10:09	49.2557		2018-11-14 06:10:14	1813.42
2018-11-14 06:10:14	49.2388		2018-11-14 06:10:19	1811.7
2018-11-14 06:10:19	49.1963		2018-11-14 06:10:24	1811.62
2018-11-14 06:10:24	49.0964		2018-11-14 06:10:29	1812.65
2018-11-14 06:10:29	48.9131		2018-11-14 06:10:34	1813.81
2018-11-14 06:10:34	48.6556		2018-11-14 06:10:39	1814.24
2018-11-14 06:10:40	48.3748		2018-11-14 06:10:44	1813.55
2018-11-14 06:10:45	48.148		2018-11-14 06:10:49	1811.83
2018-11-14 06:10:50	48.0439		2018-11-14 06:10:54	1809.58
2018-11-14 06:10:55	48.0833		2018-11-14 06:10:59	1807.63
2018-11-14 06:11:00	48.2265		2018-11-14 06:11:04	1806.83
2018-11-14 06:11:05	48.3993		2018-11-14 06:11:09	1807.5
2018-11-14 06:11:10	48.5332		2018-11-14 06:11:14	1809.28
2018-11-14 06:11:15	48.6016		2018-11-14 06:11:19	1811.44
2018-11-14 06:11:20	48.6449		2018-11-14 06:11:24	1813.43
2018-11-14 06:11:25	48.7532		2018-11-14 06:11:29	1815
2018-11-14 06:11:30	48.9913		2018-11-14 06:11:34	1816.1
2018-11-14 06:11:35	49.3281		2018-11-14 06:11:39	1816.9
2018-11-14 06:11:40	49.6537		2018-11-14 06:11:44	1817.92
2018-11-14 06:11:45	49.86		2018-11-14 06:11:49	1819.7
2018-11-14 06:11:50	49.8961		2018-11-14 06:11:54	1822.24
2018-11-14 06:11:55	49.7786		2018-11-14 06:11:59	1824.85
2018-11-14 06:12:00	49.582		2018-11-14 06:12:04	1826.76
2018-11-14 06:12:05	49.404		2018-11-14 06:12:09	1827.63
2018-11-14 06:12:10	49.3063		2018-11-14 06:12:15	1827.63
2018-11-14 06:12:15	49.2773		2018-11-14 06:12:20	1827.09
2018-11-14 06:12:20	49.248		2018-11-14 06:12:25	1826.33
2018-11-14 06:12:25	49.1498		2018-11-14 06:12:30	1825.61
2018-11-14 06:12:30	48.9765		2018-11-14 06:12:35	1825.15
2018-11-14 06:12:35	48.792		2018-11-14 06:12:40	1825.01
2018-11-14 06:12:40	48.6672		2018-11-14 06:12:45	1825.12
2018-11-14 06:12:45	48.6045		2018-11-14 06:12:50	1825.43
2018-11-14 06:12:50	48.5407		2018-11-14 06:12:55	1825.89
2018-11-14 06:12:55	48.4149		2018-11-14 06:13:00	1826.41
2018-11-14 06:13:00	48.2108

## Sheet: b
Time (UTC)	Ion_N (cm^-3)	Ion_P (cm^-3)		Time (UTC)	HV (kV)
2018-11-14 05:00:02	5.11553	-18.1436		2018-11-14 05:00:00	10.0051
2018-11-14 05:00:52	2.46104	-12.1374		2018-11-14 05:00:10	10.0107
2018-11-14 05:01:42	1.88673	-7.71447		2018-11-14 05:00:20	10.0088
2018-11-14 05:02:32	3.89139	-8.29713		2018-11-14 05:00:30	9.9987
2018-11-14 05:03:22	7.22276	-8.54819		2018-11-14 05:00:40	10.0024
2018-11-14 05:04:12	10.7918	-0.818517		2018-11-14 05:00:50	10.0116
2018-11-14 05:05:02	13.9662	15.5919		2018-11-14 05:01:00	10.0024
2018-11-14 05:05:52	15.8218	34.33		2018-11-14 05:01:10	10.0015
2018-11-14 05:06:42	15.7162	48.8799		2018-11-14 05:01:20	9.9978
2018-11-14 05:07:32	14.3718	55.7661		2018-11-14 05:01:30	10.0107
2018-11-14 05:08:22	13.3504	54.2934		2018-11-14 05:01:40	9.9996
2018-11-14 05:09:12	13.6296	47.1302		2018-11-14 05:01:50	10.0051
2018-11-14 05:10:02	15.1879	38.4429		2018-11-14 05:02:00	10.0051
2018-11-14 05:10:52	17.2686	29.675		2018-11-14 05:02:10	10.0125
2018-11-14 05:11:42	18.4243	20.649		2018-11-14 05:02:20	10.0024
2018-11-14 05:12:32	17.2709	14.8834		2018-11-14 05:02:30	9.9996
2018-11-14 05:13:22	14.0287	17.757		2018-11-14 05:02:40	10.0088
2018-11-14 05:14:12	10.6448	27.7562		2018-11-14 05:02:50	10.0051
2018-11-14 05:15:02	9.03785	35.5607		2018-11-14 05:03:00	10.0061
2018-11-14 05:15:52	9.72971	34.0871		2018-11-14 05:03:10	10.0015
2018-11-14 05:16:42	11.8935	24.6291		2018-11-14 05:03:20	10.0107
2018-11-14 05:17:32	14.0573	12.2068		2018-11-14 05:03:30	10.0024
2018-11-14 05:18:22	15.1353	0.422344		2018-11-14 05:03:40	10.0061
2018-11-14 05:19:12	15.8013	-6.93919		2018-11-14 05:03:50	10.0079
2018-11-14 05:20:02	19.4509	-3.9186		2018-11-14 05:04:00	10.0015
2018-11-14 05:20:52	31.0758	13.4055		2018-11-14 05:04:10	10.0051
2018-11-14 05:21:42	53.6645	41.86		2018-11-14 05:04:20	10.0005
2018-11-14 05:22:32	85.4416	73.7568		2018-11-14 05:04:30	10.0051
2018-11-14 05:23:22	121.427	103.963		2018-11-14 05:04:40	10.0042
2018-11-14 05:24:12	157.452	132.373		2018-11-14 05:04:50	10.0042
2018-11-14 05:25:02	191.766	160.774		2018-11-14 05:05:00	10.0088
2018-11-14 05:25:52	223.207	188.538		2018-11-14 05:05:10	9.9987
2018-11-14 05:26:42	249.532	210.961		2018-11-14 05:05:20	10.0005
2018-11-14 05:27:32	268.574	223.493		2018-11-14 05:05:30	10.0125
2018-11-14 05:28:22	280.407	227.867		2018-11-14 05:05:40	10.0079
2018-11-14 05:29:12	287.457	230.556		2018-11-14 05:05:50	10.0051
2018-11-14 05:30:02	292.587	235.578		2018-11-14 05:06:00	9.9987
2018-11-14 05:30:52	297.364	242.144		2018-11-14 05:06:10	10.0015
2018-11-14 05:31:42	301.73	247.642		2018-11-14 05:06:20	10.0051
2018-11-14 05:32:32	304.806	250.196		2018-11-14 05:06:30	9.9969
2018-11-14 05:33:22	306.28	249.201		2018-11-14 05:06:40	10.0024
2018-11-14 05:34:12	307.466	244.992		2018-11-14 05:06:50	10.0079
2018-11-14 05:35:02	310.402	239.931		2018-11-14 05:07:00	10.007
2018-11-14 05:35:52	314.991	239.421		2018-11-14 05:07:10	10.0134
2018-11-14 05:36:42	318.005	247.258		2018-11-14 05:07:20	10.0033
2018-11-14 05:37:32	316.431	260.024		2018-11-14 05:07:30	9.9978
2018-11-14 05:38:22	311.07	270.491		2018-11-14 05:07:40	10.0015
2018-11-14 05:39:12	305.674	274.479		2018-11-14 05:07:50	10.0024
2018-11-14 05:40:02	303.181	271.802		2018-11-14 05:08:00	10.0079
2018-11-14 05:40:52	303.541	265.36		2018-11-14 05:08:10	10.007
2018-11-14 05:41:42	304.892	260.867		2018-11-14 05:08:20	10.0015
2018-11-14 05:42:32	306.313	262.643		2018-11-14 05:08:30	9.9978
2018-11-14 05:43:22	308.663	269.47		2018-11-14 05:08:40	9.9978
2018-11-14 05:44:12	312.477	276.99		2018-11-14 05:08:50	10.0024
2018-11-14 05:45:02	316.384	281.872		2018-11-14 05:09:00	9.9978
2018-11-14 05:45:52	318.567	282.101		2018-11-14 05:09:10	10.0033
2018-11-14 05:46:42	318.734	276.791		2018-11-14 05:09:20	10.0088
2018-11-14 05:47:32	317.603	268.083		2018-11-14 05:09:30	10.0061
2018-11-14 05:48:22	315.505	260.414		2018-11-14 05:09:40	10.0143
2018-11-14 05:49:12	312.668	255.578		2018-11-14 05:09:50	9.9987
2018-11-14 05:50:02	309.635	251.334		2018-11-14 05:10:00	9.9969
2018-11-14 05:50:52	306.549	247.075		2018-11-14 05:10:10	10.0033
2018-11-14 05:51:42	303.695	246.983		2018-11-14 05:10:20	10.0088
2018-11-14 05:52:32	302.866	254.664		2018-11-14 05:10:30	9.996
2018-11-14 05:53:22	305.605	268.148		2018-11-14 05:10:40	10.0088
2018-11-14 05:54:12	310.16	282.245		2018-11-14 05:10:50	10.0042
2018-11-14 05:55:02	312.68	292.964		2018-11-14 05:11:00	10.0005
2018-11-14 05:55:52	311.135	298.682		2018-11-14 05:11:10	9.9932
2018-11-14 05:56:42	306.901	298.912		2018-11-14 05:11:20	10.0005
2018-11-14 05:57:32	303.568	292.8		2018-11-14 05:11:30	9.9996
2018-11-14 05:58:22	304.334	279.413		2018-11-14 05:11:40	10.0107
2018-11-14 05:59:12	309.052	260.157		2018-11-14 05:11:50	10.0088
2018-11-14 06:00:02	314.025	240.059		2018-11-14 05:12:00	9.9996
2018-11-14 06:00:52	315.295	225.805		2018-11-14 05:12:10	10.0042
2018-11-14 06:01:42	311.484	222.188		2018-11-14 05:12:20	10.0024
2018-11-14 06:02:32	304.072	229.112		2018-11-14 05:12:30	10.0015
2018-11-14 06:03:22	296.706	240.597		2018-11-14 05:12:40	10.0005
2018-11-14 06:04:12	293.398	247.714		2018-11-14 05:12:50	10.0125
2018-11-14 06:05:02	294.852	245.501		2018-11-14 05:13:00	10.0015
2018-11-14 06:05:52	296.987	237.391		2018-11-14 05:13:10	10.0107
2018-11-14 06:06:42	295.521	230.759		2018-11-14 05:13:20	10.0162
2018-11-14 06:07:32	291.283	229.515		2018-11-14 05:13:30	10.0033
2018-11-14 06:08:22	288.427	232.892		2018-11-14 05:13:40	9.9978
2018-11-14 06:09:12	288.57	237.741		2018-11-14 05:13:50	10.0033
2018-11-14 06:10:02	289.657	239.894		2018-11-14 05:14:00	10.0005
2018-11-14 06:10:52	289.922	237.374		2018-11-14 05:14:10	10.0107
2018-11-14 06:11:42	290.337	233.19		2018-11-14 05:14:20	9.9996
2018-11-14 06:12:32	292.738	231.293		2018-11-14 05:14:30	10.0015
2018-11-14 06:13:22	296.592	230.784		2018-11-14 05:14:40	10.0116
				2018-11-14 05:14:50	10.0079
				2018-11-14 05:15:00	10.0061
				2018-11-14 05:15:10	10.0015
				2018-11-14 05:15:20	10.0125
				2018-11-14 05:15:30	10.0042
				2018-11-14 05:15:40	9.9996
				2018-11-14 05:15:50	10.007
				2018-11-14 05:16:00	10.0042
				2018-11-14 05:16:10	10.0015
				2018-11-14 05:16:20	10.007
				2018-11-14 05:16:30	10.0051
				2018-11-14 05:16:40	10.0088
				2018-11-14 05:16:50	9.9978
				2018-11-14 05:17:00	10.0061
				2018-11-14 05:17:10	10.0015
				2018-11-14 05:17:20	9.9987
				2018-11-14 05:17:30	10.0033
				2018-11-14 05:17:40	10.0116
				2018-11-14 05:17:50	10.0061
				2018-11-14 05:18:00	9.9941
				2018-11-14 05:18:10	9.9996
				2018-11-14 05:18:20	10.0125
				2018-11-14 05:18:30	10.0143
				2018-11-14 05:18:40	10.0107
				2018-11-14 05:18:50	10.0033
				2018-11-14 05:19:00	10.0042
				2018-11-14 05:19:10	9.9996
				2018-11-14 05:19:20	10.0051
				2018-11-14 05:19:30	10.0088
				2018-11-14 05:19:40	10.0033
				2018-11-14 05:19:50	10.0116
				2018-11-14 05:20:00	9.9987
				2018-11-14 05:20:10	10.0042
				2018-11-14 05:20:20	10.0024
				2018-11-14 05:20:30	8.6068
				2018-11-14 05:20:40	6.8281
				2018-11-14 05:20:50	4.4136
				2018-11-14 05:21:00	2.872
				2018-11-14 05:21:10	2.3262
				2018-11-14 05:21:20	1.5444
				2018-11-14 05:21:30	1.1511
				2018-11-14 05:21:40	0.7772
				2018-11-14 05:21:50	0.6385
				2018-11-14 05:22:00	0.4318
				2018-11-14 05:22:10	0.2921
				2018-11-14 05:22:20	0.2407
				2018-11-14 05:22:30	0.1626
				2018-11-14 05:22:40	0.1056
				2018-11-14 05:22:50	0.0496
				2018-11-14 05:23:00	0.0358
				2018-11-14 05:23:10	0.0183
				2018-11-14 05:23:20	0.0091
				2018-11-14 05:23:30	0.0073
				2018-11-14 05:23:40	0.0045
				2018-11-14 05:23:50	0.0045
				2018-11-14 05:24:00	0.0036
				2018-11-14 05:24:10	0.0018
				2018-11-14 05:24:20	0.0018
				2018-11-14 05:24:30	0.0018
				2018-11-14 05:24:40	0.0018
				2018-11-14 05:24:50	0.0009
				2018-11-14 05:25:00	0.0018
				2018-11-14 05:25:10	0.0009
				2018-11-14 05:25:20	0.0018
				2018-11-14 05:25:30	0.0009
				2018-11-14 05:25:40	0.0009
				2018-11-14 05:25:50	0.0009
				2018-11-14 05:26:00	0
				2018-11-14 05:26:10	0.0009
				2018-11-14 05:26:20	0
				2018-11-14 05:26:30	0.0009
				2018-11-14 05:26:40	0
				2018-11-14 05:26:50	0
				2018-11-14 05:27:00	0
				2018-11-14 05:27:10	0
				2018-11-14 05:27:20	0
				2018-11-14 05:27:30	0
				2018-11-14 05:27:40	0
				2018-11-14 05:27:50	0
				2018-11-14 05:28:00	0
				2018-11-14 05:28:10	0
				2018-11-14 05:28:20	0
				2018-11-14 05:28:30	0
				2018-11-14 05:28:40	0
				2018-11-14 05:28:50	0
				2018-11-14 05:29:00	0
				2018-11-14 05:29:10	0
				2018-11-14 05:29:20	0
				2018-11-14 05:29:30	0
				2018-11-14 05:29:40	0
				2018-11-14 05:29:50	0
				2018-11-14 05:30:00	0
				2018-11-14 05:30:10	0
				2018-11-14 05:30:20	0
				2018-11-14 05:30:30	0
				2018-11-14 05:30:40	0
				2018-11-14 05:30:50	0
				2018-11-14 05:31:00	0
				2018-11-14 05:31:10	0
				2018-11-14 05:31:20	0
				2018-11-14 05:31:30	0
				2018-11-14 05:31:40	0
				2018-11-14 05:31:50	0
				2018-11-14 05:32:00	0
				2018-11-14 05:32:10	0
				2018-11-14 05:32:20	0
				2018-11-14 05:32:30	0
				2018-11-14 05:32:40	0
				2018-11-14 05:32:50	0
				2018-11-14 05:33:00	0
				2018-11-14 05:33:10	0
				2018-11-14 05:33:20	0
				2018-11-14 05:33:30	0
				2018-11-14 05:33:40	0
				2018-11-14 05:33:50	0
				2018-11-14 05:34:00	0
				2018-11-14 05:34:10	0
				2018-11-14 05:34:20	0
				2018-11-14 05:34:30	0
				2018-11-14 05:34:40	0
				2018-11-14 05:34:50	0
				2018-11-14 05:35:00	0
				2018-11-14 05:35:10	0
				2018-11-14 05:35:20	0
				2018-11-14 05:35:30	0
				2018-11-14 05:35:40	0
				2018-11-14 05:35:50	0
				2018-11-14 05:36:00	0
				2018-11-14 05:36:10	0
				2018-11-14 05:36:20	0
				2018-11-14 05:36:30	0
				2018-11-14 05:36:40	0
				2018-11-14 05:36:50	0
				2018-11-14 05:37:00	0
				2018-11-14 05:37:10	0
				2018-11-14 05:37:20	0
				2018-11-14 05:37:30	0
				2018-11-14 05:37:40	0
				2018-11-14 05:37:50	0
				2018-11-14 05:38:00	0
				2018-11-14 05:38:10	0
				2018-11-14 05:38:20	0
				2018-11-14 05:38:30	0
				2018-11-14 05:38:40	0
				2018-11-14 05:38:50	0
				2018-11-14 05:39:00	0
				2018-11-14 05:39:10	0
				2018-11-14 05:39:20	0
				2018-11-14 05:39:30	0
				2018-11-14 05:39:40	0
				2018-11-14 05:39:50	0
				2018-11-14 05:40:00	0
				2018-11-14 05:40:10	0
				2018-11-14 05:40:20	0
				2018-11-14 05:40:30	0
				2018-11-14 05:40:40	0
				2018-11-14 05:40:50	0
				2018-11-14 05:41:00	0
				2018-11-14 05:41:10	0
				2018-11-14 05:41:20	0
				2018-11-14 05:41:30	0
				2018-11-14 05:41:40	0
				2018-11-14 05:41:50	0
				2018-11-14 05:42:00	0
				2018-11-14 05:42:10	0
				2018-11-14 05:42:20	0
				2018-11-14 05:42:30	0
				2018-11-14 05:42:40	0
				2018-11-14 05:42:50	0
				2018-11-14 05:43:00	0
				2018-11-14 05:43:10	0
				2018-11-14 05:43:20	0
				2018-11-14 05:43:30	0
				2018-11-14 05:43:40	0
				2018-11-14 05:43:50	0
				2018-11-14 05:44:00	0
				2018-11-14 05:44:10	0
				2018-11-14 05:44:20	0
				2018-11-14 05:44:30	0
				2018-11-14 05:44:40	0
				2018-11-14 05:44:50	0
				2018-11-14 05:45:00	0
				2018-11-14 05:45:10	0
				2018-11-14 05:45:20	0
				2018-11-14 05:45:30	0
				2018-11-14 05:45:40	0
				2018-11-14 05:45:50	0
				2018-11-14 05:46:00	0
				2018-11-14 05:46:10	0
				2018-11-14 05:46:20	0
				2018-11-14 05:46:30	0
				2018-11-14 05:46:40	0
				2018-11-14 05:46:50	0
				2018-11-14 05:47:00	0
				2018-11-14 05:47:10	0
				2018-11-14 05:47:20	0
				2018-11-14 05:47:30	0
				2018-11-14 05:47:40	0
				2018-11-14 05:47:50	0
				2018-11-14 05:48:00	0
				2018-11-14 05:48:10	0
				2018-11-14 05:48:20	0
				2018-11-14 05:48:30	0
				2018-11-14 05:48:40	0
				2018-11-14 05:48:50	0
				2018-11-14 05:49:00	0
				2018-11-14 05:49:10	0
				2018-11-14 05:49:20	0
				2018-11-14 05:49:30	0
				2018-11-14 05:49:40	0
				2018-11-14 05:49:50	0
				2018-11-14 05:50:00	0
				2018-11-14 05:50:10	0
				2018-11-14 05:50:20	0
				2018-11-14 05:50:30	0
				2018-11-14 05:50:40	0
				2018-11-14 05:50:50	0
				2018-11-14 05:51:00	0
				2018-11-14 05:51:10	0
				2018-11-14 05:51:20	0
				2018-11-14 05:51:30	0
				2018-11-14 05:51:40	0
				2018-11-14 05:51:50	0
				2018-11-14 05:52:00	0
				2018-11-14 05:52:10	0
				2018-11-14 05:52:20	0
				2018-11-14 05:52:30	0
				2018-11-14 05:52:40	0
				2018-11-14 05:52:50	0
				2018-11-14 05:53:00	0
				2018-11-14 05:53:10	0
				2018-11-14 05:53:20	0
				2018-11-14 05:53:30	0
				2018-11-14 05:53:40	0
				2018-11-14 05:53:50	0
				2018-11-14 05:54:00	0
				2018-11-14 05:54:10	0
				2018-11-14 05:54:20	0
				2018-11-14 05:54:30	0
				2018-11-14 05:54:40	0
				2018-11-14 05:54:50	0
				2018-11-14 05:55:00	0
				2018-11-14 05:55:10	0
				2018-11-14 05:55:20	0
				2018-11-14 05:55:30	0
				2018-11-14 05:55:40	0
				2018-11-14 05:55:50	0
				2018-11-14 05:56:00	0
				2018-11-14 05:56:10	0
				2018-11-14 05:56:20	0
				2018-11-14 05:56:30	0
				2018-11-14 05:56:40	0
				2018-11-14 05:56:50	0
				2018-11-14 05:57:00	0
				2018-11-14 05:57:10	0
				2018-11-14 05:57:20	0
				2018-11-14 05:57:30	0
				2018-11-14 05:57:40	0
				2018-11-14 05:57:50	0
				2018-11-14 05:58:00	0
				2018-11-14 05:58:10	0
				2018-11-14 05:58:20	0
				2018-11-14 05:58:30	0
				2018-11-14 05:58:40	0
				2018-11-14 05:58:50	0
				2018-11-14 05:59:00	0
				2018-11-14 05:59:10	0
				2018-11-14 05:59:20	0
				2018-11-14 05:59:30	0
				2018-11-14 05:59:40	0
				2018-11-14 05:59:50	0
				2018-11-14 06:00:00	0
				2018-11-14 06:00:10	0
				2018-11-14 06:00:20	0
				2018-11-14 06:00:30	0
				2018-11-14 06:00:40	0
				2018-11-14 06:00:50	0
				2018-11-14 06:01:00	0
				2018-11-14 06:01:10	0
				2018-11-14 06:01:20	0
				2018-11-14 06:01:30	0
				2018-11-14 06:01:40	0
				2018-11-14 06:01:50	0
				2018-11-14 06:02:00	0
				2018-11-14 06:02:10	0
				2018-11-14 06:02:20	0
				2018-11-14 06:02:30	0
				2018-11-14 06:02:40	0
				2018-11-14 06:02:50	0
				2018-11-14 06:03:00	0
				2018-11-14 06:03:10	0
				2018-11-14 06:03:20	0
				2018-11-14 06:03:30	0
				2018-11-14 06:03:40	0
				2018-11-14 06:03:50	0
				2018-11-14 06:04:00	0
				2018-11-14 06:04:10	0
				2018-11-14 06:04:20	0
				2018-11-14 06:04:30	0
				2018-11-14 06:04:40	0
				2018-11-14 06:04:50	0
				2018-11-14 06:05:00	0
				2018-11-14 06:05:10	0
				2018-11-14 06:05:20	0
				2018-11-14 06:05:30	0
				2018-11-14 06:05:40	0
				2018-11-14 06:05:50	0
				2018-11-14 06:06:00	0
				2018-11-14 06:06:10	0
				2018-11-14 06:06:20	0
				2018-11-14 06:06:30	0
				2018-11-14 06:06:40	0
				2018-11-14 06:06:50	0
				2018-11-14 06:07:00	0
				2018-11-14 06:07:10	0
				2018-11-14 06:07:20	0
				2018-11-14 06:07:30	0
				2018-11-14 06:07:40	0
				2018-11-14 06:07:50	0
				2018-11-14 06:08:00	0
				2018-11-14 06:08:10	0
				2018-11-14 06:08:20	0
				2018-11-14 06:08:30	0
				2018-11-14 06:08:40	0
				2018-11-14 06:08:50	0
				2018-11-14 06:09:00	0
				2018-11-14 06:09:10	0
				2018-11-14 06:09:20	0
				2018-11-14 06:09:30	0
				2018-11-14 06:09:40	0
				2018-11-14 06:09:50	0
				2018-11-14 06:10:00	0
				2018-11-14 06:10:10	0
				2018-11-14 06:10:20	0
				2018-11-14 06:10:30	0
				2018-11-14 06:10:40	0
				2018-11-14 06:10:50	0
				2018-11-14 06:11:00	0
				2018-11-14 06:11:10	0
				2018-11-14 06:11:20	0
				2018-11-14 06:11:30	0
				2018-11-14 06:11:40	0
				2018-11-14 06:11:50	0
				2018-11-14 06:12:00	0
				2018-11-14 06:12:10	0
				2018-11-14 06:12:20	0
				2018-11-14 06:12:30	0
				2018-11-14 06:12:40	0
				2018-11-14 06:12:50	0
				2018-11-14 06:13:00	0

## Sheet: c
Time (UTC)	PSM_1.7 (cm^-3)	CPC_2.5 (cm^-3)
2018-11-14 05:00:48	13.5	12.9
2018-11-14 05:04:48	13.7	13.3
2018-11-14 05:08:48	13.2	12.9
2018-11-14 05:12:48	13.3	13
2018-11-14 05:16:48	13.8	12.2
2018-11-14 05:20:48	15.9	12.1
2018-11-14 05:24:48	18.6	13.1
2018-11-14 05:28:48	30.1	22.7
2018-11-14 05:32:48	37.9	30.3
2018-11-14 05:36:48	45.2	38.7
2018-11-14 05:40:48	52.9	46.8
2018-11-14 05:44:48	57	50.4
2018-11-14 05:48:48	63.2	55.9
2018-11-14 05:52:48	70.4	61.5
2018-11-14 05:56:48	79	66.5
2018-11-14 06:00:48	94.1	80
2018-11-14 06:04:48	113	97.7
2018-11-14 06:08:48	120	106
2018-11-14 06:12:48	129	117
