# Supplementary material for: Rapid growth of new atmospheric particles by nitric acid and ammonia condensation
Source: Nature. 2020 May 13;581(7807):184–9. doi: 10.1038/s41586-020-2270-4 (PMC7334196; doi:10.1038/s41586-020-2270-4)
Supplement: Supplementary file 6 — Source Data Extended Data Fig. 2 [file 41586_2020_2270_MOESM6_ESM.xlsx]

## Sheet: a
DMA-Train			nSEMS			nano-SMPS			long-SMPS
d_p (nm)	d N/d logd_p (cm^-3)		d_p (nm)	d N/d logd_p (cm^-3)		d_p (nm)	d N/d logd_p (cm^-3)		d_p (nm)	d N/d logd_p (cm^-3)
1.8	148246		3.96642	370652		8.2	11299.7		29.9614	10321
2.21217	204243		4.01556	384739		8.51	11960.4		31.059	10690.1
2.56191	287372		4.06533	398042		8.82	12429.3		32.1968	11156.1
2.86938	325285		4.11576	410393		9.14	9723.93		33.3762	11095.2
3.19497	366106		4.16688	421634		9.47	10904.3		34.5989	11582
3.54104	403279		4.21871	431620		9.82	6350.92		35.8664	11685.7
3.91008	444516		4.27126	440219		10.2	7303		37.1803	11768.2
4.30473	485780		4.32457	447318		10.6	8239.76		38.5423	12113.3
			4.37864	452820		10.9	8117.5		39.9542	12267.3
			4.43351	456647		11.3	7846.58		41.4179	11939.4
			4.48919	458742		11.8	7084.44		42.9351	12287.3
			4.54571	459067		12.2	6860.63		44.5079	12313.9
			4.60308	457608		12.6	4832.57		46.1384	12207.6
			4.66132	454370		13.1	5319.5		47.8286	12260.3
			4.72046	449382		13.6	4927.78		49.5807	11776.7
			4.78053	442694		14.1	5057.09		51.397	11695.5
			4.84153	434379		14.6	4551.94		53.2798	11926.3
			4.90349	424528		15.1	6281.18		55.2316	11388.8
			4.96643	413250		15.7	5828.34		57.2549	11460.3
			5.03034	400668		16.3	7868.54		59.3523	11596.3
			5.09506	386920		16.8	6269.26		61.5265	10749
			5.16053	372146		17.5	5499.85		63.7804	10657.7
			5.22678	356499		18.1	5464.52		66.1169	10340.6
			5.2938	340132		18.8	7345.32		68.539	9772.6
			5.36161	323200		19.5	5304.42		71.0497	8968.01
			5.4302	305861		20.2	6990.57		73.6525	8770.07
			5.49959	288269		20.9	5373.37		76.3506	8030.11
			5.56978	270576		21.7	7470.98		79.1475	7560.82
			5.64077	252930		22.5	7499.88		82.047	7012.9
			5.71258	235468		23.3	8341.33		85.0526	6181.69
			5.7852	218321		24.1	9685.4		88.1683	5734.52
			5.85865	201607		25	6273.56		91.3982	4553.9
			5.93292	185427		25.9	7888.73		94.7464	4250.47
			6.00802	169868		26.9	8612.19		98.2172	3608.22
			6.08397	155001		27.9	6492.85		101.815	2807.62
			6.16076	140879		28.9	8648.61		105.545	2485.79
			6.2384	127540		30	8862.84		109.411	1827.63
			6.3169	115013		31.1	8724.57		113.419	1429.45
			6.39626	103310		32.2	8987.48		117.574	959.289
			6.47649	92439.4		33.4	8457.07		121.881	727.149
			6.55759	82396.3		34.6	9788.67		126.346	554.487
			6.63957	73170.6		35.9	9223.95		130.975	314.602
			6.72244	64744.9		37.2	9880.73		135.773	135.712
			6.8062	57096.1		38.5	10676.2		140.746	99.5834
			6.89085	50195.5		40	9421.84		145.902	62.5655
			6.9764	44010.2		41.4	10344.7		151.247	9.57877
			7.06287	38503.3		42.9	9235.2		156.788	42.1835
			7.15025	33634.7		44.5	10988		162.531	61.1964
			7.23854	29362		46.1	10856		168.486	24.5634
			7.32776	25640.9		47.8	12676.6		174.658	56.5639
			7.41791	22426.2		49.6	11985.6		181.056	64.8738
			7.50901	19672.4		51.4	9402.86		187.688	95.4035
			7.60161	17334.2		53.3	11341.7		194.564	74.3026
			7.69607	15367.3		55.2	10837.6		201.691	98.7845
			7.79235	13728.6		57.3	10831.3		209.08	159.644
			7.8904	12377		59.4	10032.4		216.739	205.705
			7.99019	11273.7		61.5	10762.1		224.679	204.665
			8.09166	10382.4		63.8	9387.96		232.91	273.664
			8.19477	9669.61					241.442	204.593
			8.29948	9104.87					250.286	233.653
			8.40575	8660.92					259.455	136.972
			8.51352	8313.81					268.96	152.316
			8.62277	8042.85					278.813	89.6924
			8.73343	7830.67					289.026	69.0456
			8.84547	7663.02					299.614	25.0157
			8.95885	7528.64					310.59	28.4895
			9.07352	7418.84					321.968	3.21554
			9.18943	7327.24					333.762	0
			9.30654	7249.35					345.989	0
			9.42482	7182.29					358.664	0
			9.5442	7124.56					371.803	0
			9.66466	7075.93					385.423	0
			9.78614	7037.26					399.542	0
			9.90861	7010.33					414.178	0
			10.032	6997.61					429.351	0
			10.1572	7002.01					445.079	0
			10.2844	7026.61					461.384	0
			10.4135	7074.32					478.286	0
			10.5446	7147.62					495.807	0
			10.6776	7248.31					513.97	0
			10.8125	7377.28					532.798	0
			10.9492	7534.38					552.316	0
			11.0878	7718.33					572.549	0
			11.2283	7926.77					593.523	0
			11.3705	8156.34					615.265	0
			11.5145	8402.85					637.804	0
			11.6602	8661.49					661.169	0
			11.8076	8927.07					685.39	0
			11.9567	9194.27					710.497	0
			12.1075	9457.83					736.525	0
			12.26	9712.7					763.506	0
			12.414	9954.25					791.476	0
			12.5697	10178.3					820.47	0
			12.7276	10381.3					850.526	0
			12.8878	10560.2					881.683	0
			13.0504	10712.9					913.982	0
			13.2154	10837.8					947.464	0
			13.3828	10934.1					982.172	0
			13.5527	11002
			13.7251	11042.2
			13.9001	11056
			14.0776	11045.7
			14.2578	11013.8
			14.4406	10963.5
			14.6262	10898.3
			14.8144	10821.8
			15.0054	10737.9
			15.199	10650.4
			15.395	10563
			15.5933	10479.1
			15.794	10401.5
			15.997	10332.6
			16.2026	10274
			16.4105	10226.8
			16.6209	10191.3
			16.8338	10167.7
			17.0491	10155.8
			17.267	10155.1
			17.4874	10165.4
			17.7103	10186.3
			17.9358	10217.7
			18.1638	10259.5
			18.3944	10311.8
			18.6277	10375
			18.8635	10449.7
			19.102	10536.9
			19.3432	10638
			19.587	10754.8
			19.8335	10889.7
			20.083	11044.9
			20.3386	11222.9
			20.6009	11425.8
			20.8693	11655.3
			21.1431	11912.9
			21.4218	12222.3
			21.7048	12549.1
			21.9914	12880.9
			22.2812	13217.4
			22.5734	13560.7
			22.8676	13912.2

## Sheet: b
SMPS					PSM				UCPC
Time (min)	N_1.7 (cm^-3)	N_2.5 (cm^-3)	N_3.0 (cm^-3)		Time (min)	N_1.7 (cm^-3)	N_2.5 (cm^-3)		Time (min)	N_2.5 (cm^-3)
0	360.714	60.0936	60.0176		0	95714.4	63.8099		0	73.6128
5.28333	52140.6	5225.39	237.167		4	179285	503.12		0.0166667	73.6128
10.5667	216254	90826.7	30577.2		8	267090	21387.1		0.116667	73.5906
15.85	280236	192045	112957		12	395509	98266.9		0.133333	73.7294
21.1333	230223	183896	131448		16	472691	145126		0.15	73.912
26.4167	158672	139760	114892		20	428487	161209		0.166667	74.1198
31.7	109907	101351	88770.4		24	349791	151897		0.183333	73.9566
36.9833	90898.8	85380.3	77111.6		28	271233	132213		0.2	74.2144
					32	197534	104419		0.216667	74.171
					36	132046	79824.3		0.233333	74.2702
					40	101472	66445.9		0.25	74.1562
									0.266667	74.3002
									0.366667	73.9752
									0.383333	74.071
									0.4	74.049
									0.416667	74.1158
									0.433333	73.9928
									0.45	74.1492
									0.466667	74.5702
									0.483333	74.4092
									0.5	74.4808
									0.516667	74.0152
									0.616667	74.25
									0.633333	74.4612
									0.65	74.9984
									0.666667	75.0874
									0.683333	74.9
									0.7	74.6614
									0.716667	74.8496
									0.733333	75.202
									0.75	75.4388
									0.766667	75.2306
									0.866667	75.2062
									0.883333	75.2046
									0.9	75.1066
									0.916667	75.3552
									0.933333	75.1392
									0.95	75.204
									0.966667	75.1788
									0.983333	75.3622
									1	74.916
									1.01667	74.9606
									1.11667	74.932
									1.13333	75.1144
									1.15	75.5272
									1.16667	75.5464
									1.18333	75.4472
									1.2	75.4416
									1.21667	75.9786
									1.23333	75.8598
									1.25	76.188
									1.26667	76.5358
									1.36667	76.2532
									1.38333	76.1338
									1.4	75.9252
									1.41667	75.9018
									1.43333	76.4864
									1.45	75.9722
									1.46667	76.3708
									1.48333	76.5058
									1.5	76.62
									1.51667	76.3356
									1.61667	76.7532
									1.63333	76.7964
									1.65	76.746
									1.66667	76.6042
									1.68333	76.8404
									1.7	76.842
									1.71667	76.4918
									1.73333	76.5148
									1.75	76.4454
									1.76667	76.9392
									1.86667	76.613
									1.88333	76.3342
									1.9	76.148
									1.91667	76.0784
									1.93333	75.7992
									1.95	76.2686
									1.96667	76.289
									1.98333	75.8204
									2	75.537
									2.01667	75.5346
									2.11667	75.7212
									2.13333	75.649
									2.15	75.8834
									2.16667	75.6072
									2.18333	76.0764
									2.2	76.1272
									2.21667	76.1756
									2.23333	76.296
									2.25	76.6018
									2.26667	76.6046
									2.36667	76.8006
									2.38333	76.8314
									2.4	76.3972
									2.41667	76.0736
									2.43333	75.8444
									2.45	76.1998
									2.46667	76.082
									2.48333	76.5504
									2.5	76.2908
									2.51667	76.244
									2.61667	76.3606
									2.63333	76.174
									2.65	76.4768
									2.66667	76.266
									2.68333	75.6796
									2.7	75.77
									2.71667	75.3012
									2.73333	75.5646
									2.75	75.8288
									2.76667	76.2536
									2.86667	76.5182
									2.88333	76.6408
									2.9	76.5702
									2.91667	76.5954
									2.93333	76.4326
									2.95	76.622
									2.96667	76.455
									2.98333	76.5676
									3	76.6112
									3.01667	77.0062
									3.11667	77.6604
									3.13333	77.6604
									3.15	77.6368
									3.16667	77.8732
									3.18333	78.3628
									3.2	78.1262
									3.21667	78.4076
									3.23333	78.8522
									3.25	79.2742
									3.26667	79.2058
									3.36667	79.4408
									3.38333	79.6548
									3.4	80.17
									3.41667	80.4498
									3.43333	80.8226
									3.45	80.9122
									3.46667	81.4036
									3.48333	81.2158
									3.5	81.497
									3.51667	81.6834
									3.61667	82.0506
									3.63333	82.8688
									3.65	83.126
									3.66667	83.8326
									3.68333	84.5614
									3.7	85.2668
									3.71667	85.0546
									3.73333	85.0738
									3.75	85.2134
									3.76667	85.726
									3.86667	86.2874
									3.88333	86.9898
									3.9	87.061
									3.91667	87.6696
									3.93333	88.3272
									3.95	89.2886
									3.96667	91.0458
									3.98333	91.6822
									4	92.7556
									4.01667	93.408
									4.11667	93.7772
									4.13333	94.195
									4.15	95.2752
									4.16667	96.0224
									4.18333	96.9106
									4.2	97.9178
									4.21667	99.3922
									4.23333	100.094
									4.25	101.432
									4.26667	101.293
									4.36667	102.066
									4.38333	103.775
									4.4	104.88
									4.41667	106.2
									4.43333	107.775
									4.45	109.059
									4.46667	111.771
									4.48333	113.808
									4.5	116.412
									4.51667	119.638
									4.61667	122.427
									4.63333	125.473
									4.65	127.75
									4.66667	130.236
									4.68333	131.456
									4.7	132.255
									4.71667	136.149
									4.73333	141.447
									4.75	145.317
									4.76667	150.103
									4.86667	154.772
									4.88333	159.134
									4.9	164.03
									4.91667	167.544
									4.93333	172.185
									4.95	176.797
									4.96667	181.361
									4.98333	187.099
									5	193.515
									5.01667	200.052
									5.11667	207.451
									5.13333	216.408
									5.15	224.918
									5.16667	232.02
									5.18333	238.838
									5.2	246.17
									5.21667	255.5
									5.23333	264.643
									5.25	275.532
									5.26667	285.181
									5.36667	295.227
									5.38333	305.764
									5.4	316.749
									5.41667	327.665
									5.43333	339.848
									5.45	350.318
									5.46667	362.857
									5.48333	376.496
									5.5	387.622
									5.51667	398.772
									5.61667	413.273
									5.63333	426.801
									5.65	441.979
									5.66667	459.245
									5.68333	475.053
									5.7	491.293
									5.71667	505.913
									5.73333	518.533
									5.75	531.441
									5.76667	551.639
									5.86667	574.835
									5.88333	598.359
									5.9	622.429
									5.91667	647.671
									5.93333	674.009
									5.95	702.492
									5.96667	732.718
									5.98333	763.364
									6	797.514
									6.01667	832.86
									6.11667	868.19
									6.13333	902.772
									6.15	937.708
									6.16667	972.9
									6.18333	1005.74
									6.2	1040.91
									6.21667	1075.23
									6.23333	1112.01
									6.25	1151.67
									6.26667	1193.56
									6.36667	1234.45
									6.38333	1269.81
									6.4	1309.91
									6.41667	1355.35
									6.43333	1405.94
									6.45	1451.26
									6.46667	1495.17
									6.48333	1532.55
									6.5	1564.42
									6.51667	1600.46
									6.61667	1651.27
									6.63333	1707.13
									6.65	1765.02
									6.66667	1821.6
									6.68333	1881.64
									6.7	1943.62
									6.71667	2004.94
									6.73333	2070.27
									6.75	2141.7
									6.76667	2209.43
									6.86667	2268.32
									6.88333	2332.16
									6.9	2394.95
									6.91667	2457.65
									6.93333	2528.08
									6.95	2607.95
									6.96667	2702.02
									6.98333	2804.45
									7	2911.65
									7.01667	3011.5
									7.11667	3102.2
									7.13333	3196.94
									7.15	3297.28
									7.16667	3394.56
									7.18333	3490.1
									7.2	3589.08
									7.21667	3685.76
									7.23333	3791.28
									7.25	3882.2
									7.26667	3967.16
									7.36667	4034.76
									7.38333	4112.9
									7.4	4199.66
									7.41667	4286.12
									7.43333	4373.44
									7.45	4477.26
									7.46667	4579.16
									7.48333	4676.4
									7.5	4788.98
									7.51667	4895.38
									7.61667	4998.8
									7.63333	5102.24
									7.65	5204.34
									7.66667	5319.58
									7.68333	5441.28
									7.7	5578.4
									7.71667	5716.94
									7.73333	5860.32
									7.75	6016.62
									7.76667	6179.3
									7.86667	6334.68
									7.88333	6499.3
									7.9	6661.34
									7.91667	6819.78
									7.93333	6968.32
									7.95	7116.18
									7.96667	7266.38
									7.98333	7416.16
									8	7558.86
									8.01667	7701.02
									8.11667	7847.5
									8.13333	7979.08
									8.15	8135.42
									8.16667	8281.9
									8.18333	8399.76
									8.2	8508.8
									8.21667	8613.8
									8.23333	8732.16
									8.25	8843.54
									8.26667	8960.26
									8.36667	9122.82
									8.38333	9286.2
									8.4	9427.3
									8.41667	9597.3
									8.43333	9772.38
									8.45	9945.54
									8.46667	10124.7
									8.48333	10292.6
									8.5	10475.7
									8.51667	10660.3
									8.61667	10860.7
									8.63333	11058.8
									8.65	11241.5
									8.66667	11425.1
									8.68333	11635.1
									8.7	11805
									8.71667	12012.5
									8.73333	12224
									8.75	12388.7
									8.76667	12542
									8.86667	12697.1
									8.88333	12862.1
									8.9	13021.1
									8.91667	13158.5
									8.93333	13287.8
									8.95	13410.7
									8.96667	13614.8
									8.98333	13814.1
									9	13993.1
									9.01667	14150.1
									9.11667	14331.9
									9.13333	14496.1
									9.15	14674.1
									9.16667	14845.3
									9.18333	15039.7
									9.2	15262.5
									9.21667	15505.7
									9.23333	15750.7
									9.25	15997.7
									9.26667	16257.1
									9.36667	16522.2
									9.38333	16799.4
									9.4	17055.4
									9.41667	17330.4
									9.43333	17637.4
									9.45	17940.4
									9.46667	18259.6
									9.48333	18556.6
									9.5	18859.2
									9.51667	19153
									9.61667	19416.8
									9.63333	19676.8
									9.65	19946
									9.66667	20146.8
									9.68333	20327
									9.7	20532.4
									9.71667	20745.4
									9.73333	20958
									9.75	21192
									9.76667	21486.8
									9.86667	21781.4
									9.88333	22049.8
									9.9	22335
									9.91667	22625
									9.93333	22879.2
									9.95	23157.4
									9.96667	23422.6
									9.98333	23686.2
									10	23995.4
									10.0167	24326.8
									10.1167	24660.4
									10.1333	24979.8
									10.15	25299
									10.1667	25627.8
									10.1833	25945.2
									10.2	26264.8
									10.2167	26489.4
									10.2333	26724
									10.25	26971.4
									10.2667	27245.2
									10.3667	27505.6
									10.3833	27773.2
									10.4	28021
									10.4167	28286
									10.4333	28533.8
									10.45	28743
									10.4667	28950.8
									10.4833	29187.6
									10.5	29430.8
									10.5167	29678
									10.6167	29926.2
									10.6333	30169.8
									10.65	30399
									10.6667	30598.8
									10.6833	30838
									10.7	31097
									10.7167	31342.4
									10.7333	31593.6
									10.75	31848
									10.7667	32124.2
									10.8667	32413.2
									10.8833	32687.6
									10.9	32963.6
									10.9167	33272.4
									10.9333	33591.2
									10.95	33873.8
									10.9667	34194.8
									10.9833	34524.8
									11	34829.6
									11.0167	35068.4
									11.1167	35308.4
									11.1333	35581.4
									11.15	35843.4
									11.1667	36110.6
									11.1833	36374.2
									11.2	36631.6
									11.2167	36902.8
									11.2333	37170.6
									11.25	37437.2
									11.2667	37696.4
									11.3667	37928.4
									11.3833	38113.4
									11.4	38292.4
									11.4167	38571
									11.4333	38865.4
									11.45	39150.6
									11.4667	39475.6
									11.4833	39790.4
									11.5	40110.6
									11.5167	40410.4
									11.6167	40694.2
									11.6333	40981.2
									11.65	41271.2
									11.6667	41563.4
									11.6833	41848.2
									11.7	42157.8
									11.7167	42431.6
									11.7333	42680.2
									11.75	42921.4
									11.7667	43150.6
									11.8667	43388.6
									11.8833	43637.8
									11.9	43903.2
									11.9167	44192.8
									11.9333	44430.4
									11.95	44672.4
									11.9667	44897.8
									11.9833	45111
									12	45323
									12.0167	45516
									12.1167	45685.2
									12.1333	45869.4
									12.15	46069
									12.1667	46275.2
									12.1833	46477
									12.2	46700
									12.2167	46910.4
									12.2333	47105
									12.25	47322.2
									12.2667	47566.8
									12.3667	47791.2
									12.3833	47996.6
									12.4	48211.6
									12.4167	48424.4
									12.4333	48646.2
									12.45	48876
									12.4667	49103.2
									12.4833	49331.2
									12.5	49529
									12.5167	49695.2
									12.6167	49927.2
									12.6333	50239.2
									12.65	50539
									12.6667	50751.6
									12.6833	50942.8
									12.7	51136.4
									12.7167	51287.2
									12.7333	51458.6
									12.75	51636.8
									12.7667	51815.8
									12.8667	52026
									12.8833	52232.2
									12.9	52460.6
									12.9167	52690.2
									12.9333	52909
									12.95	53116
									12.9667	53354.4
									12.9833	53580
									13	53802
									13.0167	54011.4
									13.1167	54219.8
									13.1333	54408.8
									13.15	54524.8
									13.1667	54633
									13.1833	54739.2
									13.2	54868
									13.2167	55059.6
									13.2333	55262.8
									13.25	55467.2
									13.2667	55664.4
									13.3667	55862.2
									13.3833	56071
									13.4	56313
									13.4167	56532.4
									13.4333	56739.6
									13.45	56843.4
									13.4667	57054
									13.4833	57301.6
									13.5	57508.8
									13.5167	57698
									13.6167	57901.8
									13.6333	58092.6
									13.65	58227.8
									13.6667	58346.6
									13.6833	58477.6
									13.7	58624
									13.7167	58770.2
									13.7333	58941
									13.75	59160.8
									13.7667	59406
									13.8667	59615.6
									13.8833	59805
									13.9	60009.8
									13.9167	60188.4
									13.9333	60314.8
									13.95	60428.8
									13.9667	60691.4
									13.9833	60958
									14	61222.6
									14.0167	61489.2
									14.1167	61703.2
									14.1333	61921.8
									14.15	62132.2
									14.1667	62337.6
									14.1833	62494.4
									14.2	62672.4
									14.2167	62839.4
									14.2333	63039.8
									14.25	63297.8
									14.2667	63558.8
									14.3667	63746.8
									14.3833	63943.4
									14.4	64176.6
									14.4167	64433
									14.4333	64730.2
									14.45	65028.2
									14.4667	65253.6
									14.4833	65497.4
									14.5	65743.8
									14.5167	65996.8
									14.6167	66284.4
									14.6333	66556.4
									14.65	66764
									14.6667	67020
									14.6833	67282.2
									14.7	67641.8
									14.7167	67786.2
									14.7333	67894.2
									14.75	68055.6
									14.7667	68209.2
									14.8667	68369
									14.8833	68568.2
									14.9	68821.4
									14.9167	69066.4
									14.9333	69324.8
									14.95	69585.6
									14.9667	69774.6
									14.9833	69986.2
									15	70129.6
									15.0167	70288.2
									15.1167	70463
									15.1333	70631.8
									15.15	70829.6
									15.1667	71033.8
									15.1833	71325
									15.2	71619.4
									15.2167	71795
									15.2333	71960.6
									15.25	72084.6
									15.2667	72188.4
									15.3667	72378.2
									15.3833	72542.6
									15.4	72673.6
									15.4167	72836.2
									15.4333	73098.6
									15.45	73322.8
									15.4667	73590.6
									15.4833	73830.2
									15.5	74019
									15.5167	74183
									15.6167	74402.8
									15.6333	74612.4
									15.65	74889.8
									15.6667	75146.4
									15.6833	75354.4
									15.7	75535.4
									15.7167	75757.2
									15.7333	75958.2
									15.75	76138.2
									15.7667	76337.6
									15.8667	76497.2
									15.8833	76663
									15.9	76881.8
									15.9167	77063
									15.9333	77264
									15.95	77451
									15.9667	77715.4
									15.9833	77994.6
									16	78218.6
									16.0167	78445.2
									16.1167	78688.6
									16.1333	78934.8
									16.15	79171.6
									16.1667	79433.2
									16.1833	79670
									16.2	79882.4
									16.2167	80130.8
									16.2333	80364
									16.25	80638.4
									16.2667	80895.8
									16.3667	81107.2
									16.3833	81335.2
									16.4	81544.2
									16.4167	81757.8
									16.4333	81882
									16.45	82074
									16.4667	82256.4
									16.4833	82441.2
									16.5	82607.6
									16.5167	82836.2
									16.6167	82993.6
									16.6333	83179.6
									16.65	83399
									16.6667	83586
									16.6833	83753.2
									16.7	83920.6
									16.7167	83994.8
									16.7333	84070.8
									16.75	84158.6
									16.7667	84308.4
									16.8667	84469.2
									16.8833	84600.8
									16.9	84690.4
									16.9167	84751.2
									16.9333	84834.2
									16.95	84921.2
									16.9667	85006.6
									16.9833	85093
									17	85199.8
									17.0167	85293.2
									17.1167	85348.4
									17.1333	85414.6
									17.15	85416.2
									17.1667	85485.2
									17.1833	85566.6
									17.2	85665.8
									17.2167	85769.2
									17.2333	85860.8
									17.25	85993.2
									17.2667	86078
									17.3667	86121
									17.3833	86134
									17.4	86133.8
									17.4167	86102.8
									17.4333	86063.2
									17.45	86109.4
									17.4667	86220.8
									17.4833	86287
									17.5	86325.8
									17.5167	86356
									17.6167	86451.2
									17.6333	86542.8
									17.65	86592.6
									17.6667	86686.2
									17.6833	86872.4
									17.7	86991.4
									17.7167	87105.4
									17.7333	87231.8
									17.75	87403.6
									17.7667	87520.4
									17.8667	87649.8
									17.8833	87749.8
									17.9	87567.4
									17.9167	87296
									17.9333	87139.6
									17.95	86982.4
									17.9667	87168.4
									17.9833	87369.4
									18	87534.2
									18.0167	87687.4
									18.1167	87752.4
									18.1333	87886.4
									18.15	88018.2
									18.1667	88182
									18.1833	88315
									18.2	88400.2
									18.2167	88623.4
									18.2333	88840.6
									18.25	89056.2
									18.2667	89254
									18.3667	89480.2
									18.3833	89683
									18.4	89939.4
									18.4167	90158.2
									18.4333	90353.6
									18.45	90539.8
									18.4667	90681
									18.4833	90823.6
									18.5	90950.6
									18.5167	91172.8
									18.6167	91430
									18.6333	91607.6
									18.65	91792
									18.6667	92009
									18.6833	92294.4
									18.7	92505
									18.7167	92422
									18.7333	92459.4
									18.75	92545.8
									18.7667	92500.4
									18.8667	92479.4
									18.8833	92533.6
									18.9	92530
									18.9167	92418
									18.9333	92272.8
									18.95	92147.2
									18.9667	92136.6
									18.9833	92012.8
									19	91867.6
									19.0167	91716
									19.1167	91594.2
									19.1333	91594.6
									19.15	91856.6
									19.1667	92161.8
									19.1833	92361.4
									19.2	92587.8
									19.2167	92460.4
									19.2333	92329.2
									19.25	92182
									19.2667	92086
									19.3667	92113.4
									19.3833	92126.4
									19.4	92140.2
									19.4167	92160
									19.4333	92221.6
									19.45	92355.8
									19.4667	92358.6
									19.4833	92425.6
									19.5	92479.6
									19.5167	92555.4
									19.6167	92650
									19.6333	92720
									19.65	92771.8
									19.6667	92811
									19.6833	92822
									19.7	92815.2
									19.7167	92907.6
									19.7333	93034.4
									19.75	93150.6
									19.7667	93236.6
									19.8667	93312.4
									19.8833	93475.4
									19.9	93638.8
									19.9167	93790.6
									19.9333	93898.2
									19.95	93994.6
									19.9667	94321.2
									19.9833	94537.4
									20	94717.8
									20.0167	95056.8
									20.1167	95328.4
									20.1333	95475
									20.15	95713.4
									20.1667	96036.4
									20.1833	96384
									20.2	96738.8
									20.2167	96935
									20.2333	97201.6
									20.25	97528.8
									20.2667	97916.2
									20.3667	98174
									20.3833	98339.8
									20.4	98563.8
									20.4167	98810.4
									20.4333	99016.4
									20.45	99149
									20.4667	99475.4
									20.4833	99766.6
									20.5	100089
									20.5167	100325
									20.6167	100514
									20.6333	100681
									20.65	100866
									20.6667	101049
									20.6833	101199
									20.7	101297
									20.7167	101355
									20.7333	101260
									20.75	101203
									20.7667	101181
									20.8667	101169
									20.8833	101156
									20.9	101081
									20.9167	101060
									20.9333	101121
									20.95	101233
									20.9667	101301
									20.9833	101331
									21	101377
									21.0167	101407
									21.1167	101429
									21.1333	101433
									21.15	101425
									21.1667	101439
									21.1833	101461
									21.2	101471
									21.2167	101473
									21.2333	101519
									21.25	101577
									21.2667	101629
									21.3667	101620
									21.3833	101669
									21.4	101711
									21.4167	101680
									21.4333	101593
									21.45	101496
									21.4667	101427
									21.4833	101356
									21.5	101248
									21.5167	101122
									21.6167	101128
									21.6333	101127
									21.65	101103
									21.6667	100995
									21.6833	100984
									21.7	101044
									21.7167	100708
									21.7333	100493
									21.75	100435
									21.7667	100245
									21.8667	100068
									21.8833	99921.8
									21.9	99818.8
									21.9167	99690.2
									21.9333	99520.2
									21.95	99412.6
									21.9667	99502.4
									21.9833	99698.6
									22	99841
									22.0167	99970.4
									22.1167	100089
									22.1333	100233
									22.15	100419
									22.1667	100554
									22.1833	100606
									22.2	100638
									22.2167	100642
									22.2333	100664
									22.25	100638
									22.2667	100516
									22.3667	100265
									22.3833	100028
									22.4	99777.8
									22.4167	99536.4
									22.4333	99307.6
									22.45	99088
									22.4667	98875.6
									22.4833	98891.6
									22.5	98901.6
									22.5167	98706.6
									22.6167	98484.8
									22.6333	98344.4
									22.65	98368.4
									22.6667	98515.6
									22.6833	98698.2
									22.7	98867.8
									22.7167	99068.8
									22.7333	99289.6
									22.75	99496.2
									22.7667	99690.2
									22.8667	99848.2
									22.8833	99985.6
									22.9	100100
									22.9167	100321
									22.9333	100467
									22.95	100595
									22.9667	100784
									22.9833	100869
									23	100882
									23.0167	100871
									23.1167	100783
									23.1333	100723
									23.15	100694
									23.1667	100742
									23.1833	100845
									23.2	100884
									23.2167	100618
									23.2333	100304
									23.25	100029
									23.2667	99818.6
									23.3667	99701.6
									23.3833	99571.8
									23.4	99384.4
									23.4167	99287.6
									23.4333	99325.6
									23.45	99389.6
									23.4667	99417.6
									23.4833	99383.6
									23.5	99399.6
									23.5167	99503.4
									23.6167	99746.2
									23.6333	100087
									23.65	100451
									23.6667	100761
									23.6833	101067
									23.7	101363
									23.7167	101653
									23.7333	101671
									23.75	101683
									23.7667	101886
									23.8667	102184
									23.8833	102407
									23.9	102459
									23.9167	102441
									23.9333	102411
									23.95	102425
									23.9667	102365
									23.9833	102289
									24	102108
									24.0167	101913
									24.1167	101632
									24.1333	101409
									24.15	101205
									24.1667	100997
									24.1833	100742
									24.2	100509
									24.2167	100574
									24.2333	100531
									24.25	100314
									24.2667	100232
									24.3667	100234
									24.3833	100171
									24.4	100099
									24.4167	99910.4
									24.4333	99715.2
									24.45	99514.4
									24.4667	99610
									24.4833	99689.6
									24.5	99706.8
									24.5167	99632.6
									24.6167	99529.8
									24.6333	99581.6
									24.65	99700.4
									24.6667	99757.2
									24.6833	99731.2
									24.7	99611.2
									24.7167	99659.2
									24.7333	99773.2
									24.75	99855.2
									24.7667	99951.2
									24.8667	100018
									24.8833	99993.8
									24.9	99975.8
									24.9167	99995.8
									24.9333	99961.8
									24.95	99945.8
									24.9667	99937.8
									24.9833	99945.8
									25	99965.8
									25.0167	99989.8
									25.1167	100002
									25.1333	99999.8
									25.15	100002
									25.1667	99995.8
									25.1833	100020
									25.2	99977.8
									25.2167	99997.8
									25.2333	100016
									25.25	99871
									25.2667	99797.2
									25.3667	99866.6
									25.3833	100073
									25.4	100272
									25.4167	100462
									25.4333	100690
									25.45	100903
									25.4667	101000
									25.4833	101250
									25.5	101606
									25.5167	101981
									25.6167	102334
									25.6333	102722
									25.65	103035
									25.6667	103402
									25.6833	103746
									25.7	104084
									25.7167	104244
									25.7333	104403
									25.75	104563
									25.7667	104637
									25.8667	104654
									25.8833	104497
									25.9	104385
									25.9167	104284
									25.9333	104230
									25.95	104245
									25.9667	104039
									25.9833	103923
									26	103820
									26.0167	103573
									26.1167	103417
									26.1333	103365
									26.15	103315
									26.1667	103267
									26.1833	103235
									26.2	103207
									26.2167	103153
									26.2333	103127
									26.25	103063
									26.2667	103025
									26.3667	102995
									26.3833	102943
									26.4	102867
									26.4167	102791
									26.4333	102675
									26.45	102581
									26.4667	102519
									26.4833	102505
									26.5	102770
									26.5167	102973
									26.6167	103123
									26.6333	102983
									26.65	102692
									26.6667	102565
									26.6833	102501
									26.7	102362
									26.7167	102147
									26.7333	101994
									26.75	101898
									26.7667	101824
									26.8667	101756
									26.8833	101670
									26.9	101596
									26.9167	101534
									26.9333	101472
									26.95	101404
									26.9667	101217
									26.9833	100924
									27	100768
									27.0167	100803
									27.1167	100806
									27.1333	100785
									27.15	100733
									27.1667	100620
									27.1833	100461
									27.2	100354
									27.2167	100440
									27.2333	100406
									27.25	100393
									27.2667	100519
									27.3667	100605
									27.3833	100575
									27.4	100557
									27.4167	100521
									27.4333	100501
									27.45	100465
									27.4667	100457
									27.4833	100403
									27.5	100389
									27.5167	100339
									27.6167	100293
									27.6333	100255
									27.65	100239
									27.6667	100226
									27.6833	100222
									27.7	100241
									27.7167	100217
									27.7333	100120
									27.75	100016
									27.7667	99970.2
									27.8667	99928.2
									27.8833	99994.8
									27.9	100207
									27.9167	100235
									27.9333	100209
									27.95	100259
									27.9667	100155
									27.9833	100099
									28	99923.6
									28.0167	99755.2
									28.1167	99719
									28.1333	99699
									28.15	99667
									28.1667	99575
									28.1833	99404.4
									28.2	99160.4
									28.2167	99297.2
									28.2333	99588.2
									28.25	99795
									28.2667	99867.2
									28.3667	99973
									28.3833	100145
									28.4	100289
									28.4167	100453
									28.4333	100630
									28.45	100722
									28.4667	100691
									28.4833	100661
									28.5	100619
									28.5167	100588
									28.6167	100536
									28.6333	100468
									28.65	100405
									28.6667	100329
									28.6833	100264
									28.7	100201
									28.7167	100145
									28.7333	100094
									28.75	100026
									28.7667	99974.2
									28.8667	99925.8
									28.8833	99893.4
									28.9	99880.2
									28.9167	99867
									28.9333	99879.2
									28.95	99862.8
									28.9667	99819
									28.9833	99820.2
									29	99838.6
									29.0167	99800.2
									29.1167	99759.4
									29.1333	99692.2
									29.15	99610.6
									29.1667	99587.2
									29.1833	99551.8
									29.2	99501.6
									29.2167	99671.8
									29.2333	99680.6
									29.25	99745.6
									29.2667	99796.8
									29.3667	99678.8
									29.3833	99597.2
									29.4	99565
									29.4167	99585.2
									29.4333	99705.8
									29.45	99927.4
									29.4667	99831.2
									29.4833	99768.4
									29.5	99686.4
									29.5167	99636
									29.6167	99566.4
									29.6333	99500.4
									29.65	99472.2
									29.6667	99439.2
									29.6833	99371.8
									29.7	99325.6
									29.7167	99252
									29.7333	99195
									29.75	99144.2
									29.7667	99087.4
									29.8667	99021
									29.8833	98981.4
									29.9	98929.8
									29.9167	98902.2
									29.9333	98868.8
									29.95	98854
									29.9667	98769.8
									29.9833	98699.2
									30	98646.8
									30.0167	98606.6
									30.1167	98553.8
									30.1333	98491.4
									30.15	98425.8
									30.1667	98350.8
									30.1833	98265.8
									30.2	98176.6
									30.2167	98013.8
									30.2333	97850
									30.25	97748.8
									30.2667	97602.8
									30.3667	97401
									30.3833	97205.2
									30.4	97000.8
									30.4167	96778.8
									30.4333	96659.4
									30.45	96592.4
									30.4667	96579.6
									30.4833	96581.6
									30.5	96585.2
									30.5167	96564.2
									30.6167	96565.4
									30.6333	96505.8
									30.65	96439.2
									30.6667	96351.8
									30.6833	96267.6
									30.7	96214.2
									30.7167	96186.6
									30.7333	96137.2
									30.75	96113.8
									30.7667	96073.4
									30.8667	96044.2
									30.8833	95999.2
									30.9	95935
									30.9167	95855.2
									30.9333	95778.8
									30.95	95678.8
									30.9667	95452.2
									30.9833	95225.2
									31	95039.6
									31.0167	94854.8
									31.1167	94678.6
									31.1333	94549.2
									31.15	94492.8
									31.1667	94420.4
									31.1833	94344.6
									31.2	94254.2
									31.2167	94219.6
									31.2333	94180.2
									31.25	94137.2
									31.2667	94052.2
									31.3667	93999
									31.3833	93966.8
									31.4	93932.8
									31.4167	93871.8
									31.4333	93819.8
									31.45	93792.6
									31.4667	93788.6
									31.4833	93802.4
									31.5	93751
									31.5167	93743.2
									31.6167	93793.6
									31.6333	93876.6
									31.65	93934
									31.6667	93957.6
									31.6833	93883.2
									31.7	93760.4
									31.7167	93714.6
									31.7333	93652.8
									31.75	93581.4
									31.7667	93521.2
									31.8667	93458.6
									31.8833	93417.2
									31.9	93325.6
									31.9167	93260.2
									31.9333	93200.4
									31.95	93095.6
									31.9667	92998.2
									31.9833	92826.4
									32	92751.2
									32.0167	92655.4
									32.1167	92582.6
									32.1333	92528.2
									32.15	92455.6
									32.1667	92391
									32.1833	92340.4
									32.2	92259.8
									32.2167	92362.2
									32.2333	92454.4
									32.25	92498.2
									32.2667	92573.4
									32.3667	92656
									32.3833	92646.8
									32.4	92555.4
									32.4167	92494.8
									32.4333	92432.6
									32.45	92378.4
									32.4667	92329.8
									32.4833	92272.4
									32.5	92220
									32.5167	92186
									32.6167	92134
									32.6333	92063.4
									32.65	91992.6
									32.6667	91950
									32.6833	91902
									32.7	91847.8
									32.7167	91872.8
									32.7333	91894.2
									32.75	91898.4
									32.7667	91895
									32.8667	91861.2
									32.8833	91840.8
									32.9	91862.2
									32.9167	91904.4
									32.9333	91944.8
									32.95	91986
									32.9667	91924.2
									32.9833	91855.2
									33	91798
									33.0167	91773.8
									33.1167	91769.2
									33.1333	91740.2
									33.15	91716.8
									33.1667	91689.2
									33.1833	91669.4
									33.2	91647.8
									33.2167	91649
									33.2333	91712.6
									33.25	91657.8
									33.2667	91626.6
									33.3667	91547
									33.3833	91468.6
									33.4	91411.2
									33.4167	91347.8
									33.4333	91267.2
									33.45	91255.2
									33.4667	91166.8
									33.4833	91070.6
									33.5	90966.4
									33.5167	90831.2
									33.6167	90767.6
									33.6333	90728.6
									33.65	90716
									33.6667	90620.2
									33.6833	90529.4
									33.7	90481
									33.7167	90433
									33.7333	90370
									33.75	90287.6
									33.7667	90237.4
									33.8667	90172.6
									33.8833	90108.6
									33.9	90047.2
									33.9167	89986.8
									33.9333	89920.6
									33.95	89852.6
									33.9667	89760.2
									33.9833	89664.6
									34	89537.2
									34.0167	89408.2
									34.1167	89339.2
									34.1333	89253.6
									34.15	89191.4
									34.1667	89125.2
									34.1833	89051.8
									34.2	89014
									34.2167	88951.2
									34.2333	88901.2
									34.25	88841.2
									34.2667	88775
									34.3667	88682.4
									34.3833	88600.8
									34.4	88530.8
									34.4167	88456.8
									34.4333	88338.2
									34.45	88235.6
									34.4667	88159.6
									34.4833	88098.4
									34.5	88041
									34.5167	87972.6
									34.6167	87920.6
									34.6333	87881.6
									34.65	87850.8
									34.6667	87807.6
									34.6833	87788.2
									34.7	87740.2
									34.7167	87760.2
									34.7333	87778.6
									34.75	87815.6
									34.7667	87857.2
									34.8667	87808.4
									34.8833	87732.2
									34.9	87669.6
									34.9167	87682.6
									34.9333	87652
									34.95	87534.2
									34.9667	87462.2
									34.9833	87409.2
									35	87330.2
									35.0167	87159.6
									35.1167	87051.2
									35.1333	86955.8
									35.15	86869.6
									35.1667	86818.2
									35.1833	86747
									35.2	86671.6
									35.2167	86612.2
									35.2333	86543.6
									35.25	86517
									35.2667	86470
									35.3667	86369.2
									35.3833	86288.4
									35.4	86166.4
									35.4167	86070.8
									35.4333	85953.6
									35.45	85772.8
									35.4667	85592.6
									35.4833	85399.4
									35.5	85210.8
									35.5167	85057
									35.6167	84908.2
									35.6333	84776.8
									35.65	84708.8
									35.6667	84595.8
									35.6833	84536.8
									35.7	84428.8
									35.7167	84372
									35.7333	84277.8
									35.75	84180.8
									35.7667	84114.2
									35.8667	84068.4
									35.8833	84012.8
									35.9	83952.2
									35.9167	83908.4
									35.9333	83848.4
									35.95	83781
									35.9667	83729.4
									35.9833	83685.2
									36	83615.8
									36.0167	83537.2
									36.1167	83479.4
									36.1333	83465
									36.15	83411
									36.1667	83341
									36.1833	83313.2
									36.2	83324.8
									36.2167	83286.2
									36.2333	83237
									36.25	83219.8
									36.2667	83274
									36.3667	83264.6
									36.3833	83241.6
									36.4	83188.8
									36.4167	83097.6
									36.4333	83029.6
									36.45	82966.4
									36.4667	82885.4
									36.4833	82801.8
									36.5	82728.8
									36.5167	82727.8
									36.6167	82728.2
									36.6333	82647.8
									36.65	82547
									36.6667	82425
									36.6833	82386.6
									36.7	82356
									36.7167	82356.2
									36.7333	82392
									36.75	82464.8
									36.7667	82495.8
									36.8667	82551.6
									36.8833	82591.2
									36.9	82543.4
									36.9167	82535.8
									36.9333	82501.8
									36.95	82519.8
									36.9667	82444.4
									36.9833	82380
									37	82300.4
									37.0167	82224
									37.1167	82147.2
									37.1333	82049.6
									37.15	81961.2
									37.1667	81883.4
									37.1833	81808.4
									37.2	81739.4
									37.2167	81650.2
									37.2333	81570.4
									37.25	81497
									37.2667	81422.6
									37.3667	81327.2
									37.3833	81234.2
									37.4	81129
									37.4167	80958
									37.4333	80831.6
									37.45	80722.8
									37.4667	80652.4
									37.4833	80584.4
									37.5	80516.8
									37.5167	80448.6
									37.6167	80377.4
									37.6333	80284.6
									37.65	80218.4
									37.6667	80163.4
									37.6833	80103.6
									37.7	80047.4
									37.7167	80016.8
									37.7333	80006
									37.75	79975.2
									37.7667	79904
									37.8667	79836.8
									37.8833	79823.8
									37.9	79843.6
									37.9167	79876.8
									37.9333	79835
									37.95	79828.6
									37.9667	79779.8
									37.9833	79731
									38	79645.8
									38.0167	79551
									38.1167	79464.8
									38.1333	79355.6
									38.15	79250
									38.1667	79177.6
									38.1833	79142.4
									38.2	79100.8
									38.2167	79066
									38.2333	79025.4
									38.25	79018.2
									38.2667	78980
									38.3667	78936.8
									38.3833	78916.6
									38.4	78877.2
									38.4167	78836.4
									38.4333	78792.2
									38.45	78768
									38.4667	78740.2
									38.4833	78708.8
									38.5	78694.2
									38.5167	78657.6
									38.6167	78632
									38.6333	78620.6
									38.65	78614.2
									38.6667	78663
									38.6833	78663.6
									38.7	78631.2
									38.7167	78582
									38.7333	78527
									38.75	78482.2
									38.7667	78428.2
									38.8667	78382
									38.8833	78353.8
									38.9	78251.8
									38.9167	78139.4
									38.9333	78018
									38.95	77878.4
									38.9667	77740.8
									38.9833	77584
									39	77444
									39.0167	77305.6
									39.1167	77197.8
									39.1333	77064.4
									39.15	76931
									39.1667	76780.4
									39.1833	76655.6
									39.2	76528.6
									39.2167	76446.4
									39.2333	76359.8
									39.25	76284
									39.2667	76283.4
									39.3667	76267
									39.3833	76271.8
									39.4	76297.8
									39.4167	76288.8
									39.4333	76259.8
									39.45	76211.8
									39.4667	76187
									39.4833	76178.6
									39.5	76168
									39.5167	76185.6
									39.6167	76177.2
									39.6333	76153
									39.65	76160.8
									39.6667	76158.4
									39.6833	76159
