# Supplementary material for: Rapid growth of new atmospheric particles by nitric acid and ammonia condensation
Source: Nature. 2020 May 13;581(7807):184–9. doi: 10.1038/s41586-020-2270-4 (PMC7334196; doi:10.1038/s41586-020-2270-4)
Supplement: Supplementary file 7 — Source Data Extended Data Fig. 3 [file 41586_2020_2270_MOESM7_ESM.xlsx]

## Sheet: a
	d N/d logd_p (cm^-3)				10 % appearance time			50 % appearance time			90 % appearance time
Time(min)	_100 nm	_150 nm	_200 nm		Time(min)	d N/d logd_p (cm^-3)		Time(min)	d N/d logd_p (cm^-3)		Time(min)	d N/d logd_p (cm^-3)
0	1	1	1		4.27446	1619.67		10.5932	8169.17		20.6289	14663.9
0.185846	1.0041	1	1		8.9206	807.924		15.9827	4185.6		24.16	7409.34
0.371692	1.18748	1	1		15.2394	148.516		21.1864	717.304		27.1335	1285.06
0.557538	2.35767	1	1
0.743384	5.9321	1.00001	1
0.929229	13.5633	1.00012	1
1.11508	26.8473	1.00076	1
1.30092	47.1695	1.00328	1
1.48677	75.6444	1.01095	1
1.67261	113.108	1.03041	1
1.85846	160.137	1.07333	1
2.0443	217.079	1.15812	1
2.23015	284.09	1.31166	1
2.416	361.163	1.57066	1
2.60184	448.163	1.98273	1
2.78769	544.851	2.60694	1
2.97353	650.907	3.51399	1
3.15938	765.953	4.78599	1
3.34523	889.565	6.51573	1
3.53107	1021.29	8.80572	1
3.71692	1160.65	11.767	1.00001
3.90276	1307.15	15.5175	1.00001
4.08861	1460.32	20.1808	1.00003
4.27446	1619.67	25.8843	1.00006
4.4603	1784.7	32.7576	1.00013
4.64615	1954.95	40.9309	1.00024
4.83199	2129.97	50.5333	1.00046
5.01784	2309.3	61.6918	1.00083
5.20369	2492.52	74.5295	1.00146
5.38953	2679.22	89.1647	1.00248
5.57538	2869	105.71	1.00409
5.76122	3061.48	124.27	1.00659
5.94707	3256.32	144.943	1.01037
6.13291	3453.17	167.819	1.01596
6.31876	3651.7	192.977	1.02406
6.50461	3851.62	220.491	1.03558
6.69045	4052.63	250.421	1.0517
6.8763	4254.47	282.82	1.07388
7.06214	4456.89	317.732	1.10393
7.24799	4659.63	355.19	1.14408
7.43384	4862.48	395.218	1.19701
7.61968	5065.23	437.831	1.26593
7.80553	5267.67	483.033	1.3546
7.99137	5469.64	530.824	1.46744
8.17722	5670.94	581.19	1.60951
8.36307	5871.43	634.114	1.78664
8.54891	6070.96	689.568	2.0054
8.73476	6269.38	747.518	2.2732
8.9206	6466.58	807.924	2.59828
9.10645	6662.42	870.739	2.98974
9.29229	6856.81	935.909	3.45756
9.47814	7049.64	1003.38	4.01261
9.66399	7240.81	1073.08	4.66662
9.84983	7430.25	1144.95	5.43221
10.0357	7617.88	1218.92	6.32281
10.2215	7803.61	1294.91	7.35267
10.4074	7987.4	1372.84	8.53676
10.5932	8169.17	1452.63	9.89077
10.7791	8348.88	1534.2	11.431
10.9649	8526.48	1617.46	13.1744
11.1508	8701.92	1702.33	15.1382
11.3366	8875.17	1788.72	17.3401
11.5224	9046.2	1876.53	19.7982
11.7083	9214.97	1965.69	22.5306
11.8941	9381.45	2056.09	25.5557
12.08	9545.63	2147.64	28.8916
12.2658	9707.49	2240.27	32.5565
12.4517	9867.01	2333.87	36.5681
12.6375	10024.2	2428.35	40.944
12.8234	10179	2523.64	45.7013
13.0092	10331.4	2619.63	50.8562
13.1951	10481.5	2716.24	56.4246
13.3809	10629.2	2813.39	62.4215
13.5668	10774.5	2910.99	68.8609
13.7526	10917.5	3008.96	75.7559
13.9384	11058	3107.22	83.1187
14.1243	11196.3	3205.69	90.9602
14.3101	11332.1	3304.28	99.2901
14.496	11465.6	3402.93	108.117
14.6818	11596.8	3501.56	117.448
14.8677	11725.6	3600.1	127.288
15.0535	11852.2	3698.47	137.643
15.2394	11976.4	3796.61	148.516
15.4252	12098.4	3894.46	159.907
15.6111	12218.1	3991.95	171.817
15.7969	12335.5	4089.01	184.244
15.9827	12450.7	4185.6	197.186
16.1686	12563.6	4281.64	210.637
16.3544	12674.4	4377.1	224.594
16.5403	12783	4471.91	239.047
16.7261	12889.4	4566.02	253.989
16.912	12993.7	4659.38	269.409
17.0978	13095.9	4751.95	285.297
17.2837	13196	4843.69	301.639
17.4695	13294	4934.55	318.422
17.6554	13389.9	5024.49	335.631
17.8412	13483.8	5113.47	353.25
18.0271	13575.7	5201.46	371.262
18.2129	13665.6	5288.42	389.648
18.3987	13753.6	5374.32	408.39
18.5846	13839.6	5459.13	427.467
18.7704	13923.7	5542.81	446.86
18.9563	14005.8	5625.36	466.546
19.1421	14086.1	5706.73	486.505
19.328	14164.6	5786.9	506.713
19.5138	14241.2	5865.86	527.147
19.6997	14316	5943.58	547.784
19.8855	14389.1	6020.05	568.601
20.0714	14460.4	6095.24	589.572
20.2572	14529.9	6169.14	610.675
20.443	14597.8	6241.75	631.885
20.6289	14663.9	6313.03	653.177
20.8147	14728.4	6382.99	674.527
21.0006	14791.2	6451.61	695.911
21.1864	14852.4	6518.89	717.304
21.3723	14912	6584.81	738.683
21.5581	14970.1	6649.37	760.023
21.744	15026.6	6712.57	781.302
21.9298	15081.5	6774.4	802.496
22.1157	15134.9	6834.85	823.582
22.3015	15186.9	6893.93	844.538
22.4874	15237.4	6951.64	865.342
22.6732	15286.4	7007.97	885.974
22.859	15334	7062.92	906.411
23.0449	15380.2	7116.51	926.634
23.2307	15425	7168.72	946.623
23.4166	15468.5	7219.56	966.359
23.6024	15510.6	7269.04	985.824
23.7883	15551.4	7317.16	1005
23.9741	15590.9	7363.92	1023.87
24.16	15629.1	7409.34	1042.42
24.3458	15666.1	7453.42	1060.63
24.5317	15701.8	7496.16	1078.49
24.7175	15736.2	7537.58	1095.98
24.9034	15769.5	7577.68	1113.1
25.0892	15801.6	7616.47	1129.82
25.275	15832.5	7653.96	1146.13
25.4609	15862.3	7690.16	1162.04
25.6467	15890.9	7725.08	1177.52
25.8326	15918.5	7758.73	1192.56
26.0184	15944.9	7791.13	1207.16
26.2043	15970.2	7822.28	1221.31
26.3901	15994.5	7852.19	1235
26.576	16017.8	7880.89	1248.22
26.7618	16040	7908.37	1260.98
26.9477	16061.2	7934.65	1273.26
27.1335	16081.4	7959.75	1285.06
27.3193	16100.6	7983.68	1296.37
27.5052	16118.9	8006.45	1307.2
27.691	16136.2	8028.08	1317.54
27.8769	16152.6	8048.57	1327.38
28.0627	16168	8067.94	1336.74
28.2486	16182.6	8086.22	1345.6
28.4344	16196.3	8103.4	1353.97
28.6203	16209.1	8119.51	1361.84
28.8061	16221	8134.55	1369.23
28.992	16232.2	8148.56	1376.12
29.1778	16242.4	8161.52	1382.53
29.3637	16251.9	8173.48	1388.45
29.5495	16260.6	8184.42	1393.89
29.7353	16268.4	8194.38	1398.85
29.9212	16275.5	8203.37	1403.33
30.107	16281.9	8211.4	1407.35
30.2929	16287.5	8218.48	1410.9
30.4787	16292.3	8224.64	1413.99
30.6646	16296.5	8229.88	1416.62
30.8504	16299.9	8234.22	1418.8
31.0363	16302.6	8237.67	1420.54
31.2221	16304.6	8240.26	1421.84
31.408	16306	8241.99	1422.71
31.5938	16306.7	8242.87	1423.16
31.7796	16306.7	8242.93	1423.19
31.9655	16306.1	8242.18	1422.81
32.1513	16304.9	8240.63	1422.03
32.3372	16303.1	8238.29	1420.85
32.523	16300.6	8235.18	1419.29
32.7089	16297.6	8231.32	1417.34
32.8947	16294	8226.72	1415.03
33.0806	16289.8	8221.39	1412.35
33.2664	16285	8215.34	1409.32
33.4523	16279.7	8208.59	1405.94
33.6381	16273.8	8201.16	1402.23
33.824	16267.4	8193.05	1398.18
34.0098	16260.5	8184.29	1393.82
34.1956	16253	8174.87	1389.14
34.3815	16245.1	8164.83	1384.16
34.5673	16236.6	8154.16	1378.89
34.7532	16227.7	8142.89	1373.33
34.939	16218.2	8131.02	1367.49
35.1249	16208.3	8118.57	1361.38
35.3107	16198	8105.55	1355.01
35.4966	16187.2	8091.97	1348.4
35.6824	16175.9	8077.85	1341.53
35.8683	16164.2	8063.19	1334.44
36.0541	16152.1	8048.01	1327.12
36.2399	16139.6	8032.33	1319.58
36.4258	16126.6	8016.15	1311.83
36.6116	16113.3	7999.48	1303.88
36.7975	16099.5	7982.34	1295.73
36.9833	16085.4	7964.73	1287.4

## Sheet: b
d N/d logd_p (cm^-3)
	d_p (nm)	19.587	20.2	20.9	21.7	22.5	23.3	24.1	25	25.9	26.9	27.9	28.9	30	31.1	32.2	33.4	34.6	35.9	37.2	38.5	40	41.4	42.9	44.5	46.1	47.8	49.6	51.4	53.3	55.2	57.3	61.5265	63.7804	66.1169	68.539	71.0497	73.6525	76.3506	79.1476	82.047	85.0526	88.1683	91.3982	94.7464	98.2172	101.815	105.545	109.411
Time (min)		19.587	20.2	20.9	21.7	22.5	23.3	24.1	25	25.9
0.283333	0.283333	1745.22	949.663	2367.76	2740.32	1581.57	2001.16	1495.81	2587.22	2131.48	1893.92	1849.9	949.381	903.095	1535.2	1409.06	1580.55	2373.99	2428.12	999.252	1766.87	1097.87	1995.45	1748.23	1037.76	2626.64	1704.98	1507.27	1757.99	1757.91	1595.53	1655.38	1363.33	1345.25	1273.19	1225.05	1122.57	1107.7	1164.85	1045.17	970.512	853.366	851.7	894.466	724.849	674.898	579.744	529.515	410.067
5.56667	5.56667	15056.1	7881.73	5678.7	8464.29	7696.15	8282.69	7735.97	9533.04	10989.5	9023.39	9944.73	11821.2	9275.35	10626.1	10317	12658.9	9028.8	10947.3	10060.1	10168.5	11162.2	11701.2	12462.8	13352.9	11436	12467	11974.8	11036	11896.1	11100.1	9422.49	11879	11006.6	10541	10088.7	10125.4	9854.25	9777.62	9354.35	8467.56	7993.17	7838.96	7422.55	6886.29	6535.22	6164.51	5428.6	4989.38
10.85	10.85	14301.4	9155.48	11619.6	9752.65	8830.47	11463.7	9434.09	11405.5	10073.9	11239.6	10951.6	10608.3	13987.3	10724.9	13130.8	11547.2	15641.1	15008	13028.4	13688	13906	16630.2	10843.3	17404.8	18066.5	15380.6	17055.2	16911.7	19082.5	19164.1	14248.1	16690.6	16092.1	16060	16201.3	15450.7	14866.4	13945	14142.1	13998.9	12977.5	12257.3	12013.7	11359.4	10894.4	10130	9314.53	8848.46
16.1333	16.1333	9778.36	6535.11	9365.71	8950.85	7765.41	8072.53	9327.85	7819.9	9374.67	8793.36	9631.67	10019.2	9440.87	9806.21	11286	10746	12714.4	10911.6	13340.4	14078	9883.46	13582.5	12170	16692.5	15026.5	18128.9	15915.2	13279.3	17998	18303.3	19543.6	16220.2	17003	16747.7	16355.5	16734.6	16418.6	16608.5	16245	16029.6	15339.2	15399.5	15082.3	14130.9	13753.9	12824	12412	12284.7
21.4167	21.4167	6962.51	4523.34	6465.71	4518.43	5599.63	7601.7	6383.88	5981.03	6498.61	7727.39	9070.97	6456.96	7795.39	9504.37	7877.5	9688.49	7989.65	8895.16	11861.4	9513.07	10761.2	10634	10397.3	14577.1	14569.6	15103.3	13562.7	15340.8	15043.9	18413.2	17627	15148.2	15378.7	15684.4	15808.6	15990.6	16060.1	16123.2	16837.1	16487	16526	16406.8	16686.6	16111.9	15105.4	15136.6	14243.1	14075.2
26.7	26.7	4641.62	6543.07	4434.59	2710.9	5742.32	4222.66	3331.16	6185.39	4428.82	4378.09	4821.48	6939.02	5472.2	5406.83	8211.19	7126.23	6548.32	4916.05	8354.93	6831.32	10235.3	7540.13	9322.17	10618.8	12305.8	11499.5	11099.5	13228.3	13468.4	18628.5	16062.8	12537.6	13399.2	13785.5	13984.5	14631	14700.7	15085.4	15137.6	15767	15870.9	15951.9	16308	16474.2	16227.1	16306.8	15985.8	15462.4
31.9833	31.9833	4228.64	3635.03	3443.84	2504.52	2349.42	4707.62	4539.7	2388.59	5931.86	6199.44	8346.05	4356.78	6244.62	4772.18	7530.39	4961.34	7922.59	4919.12	5657.14	7916.4	5909.66	7641.75	8145.2	7911.1	9712.01	13972.1	9507.62	9630.8	14718	13331.2	13029.4	10656.8	11339.4	11985.4	11690.7	12550.5	12606.8	13017.1	13288.3	13583.7	14249.4	14372.7	14652.9	14561	14952.5	14865.4	14855.3	14330
[truncated: 29 more columns]
