# Supplementary material for: Rapid growth of new atmospheric particles by nitric acid and ammonia condensation
Source: Nature. 2020 May 13;581(7807):184–9. doi: 10.1038/s41586-020-2270-4 (PMC7334196; doi:10.1038/s41586-020-2270-4)
Supplement: Supplementary file 8 — Source Data Extended Data Fig. 4 [file 41586_2020_2270_MOESM8_ESM.xlsx]

## Sheet: Sheet1
T (°C)	SS_10 °C	SS_5 °C	SS_0 °C	SS_-5 °C
10	1
9	1.32373
8	1.7559
7	2.33404
6	3.10912
5	4.15046	1
4	5.55258	1.33782
3	7.44464	1.79369
2	10.0035	2.41022
1	13.472	3.24591
0	18.1843	4.38126	1
-1	24.6009	5.92727	1.35287
-2	33.3589	8.03739	1.83449
-3	45.3405	10.9242	2.49339
-4	61.7716	14.8831	3.39698
-5	84.3586	20.3251	4.6391	1
-6	115.484	27.8243	6.35075	1.36896
-7	158.48	38.1837	8.71522	1.87864
-8	218.023	52.5298	11.9896	2.58448
-9	300.689	72.447	16.5356	3.56441
-10	415.749	100.169	22.8631	4.92835
