# Supplementary material for: Rapid growth of new atmospheric particles by nitric acid and ammonia condensation
Source: Nature. 2020 May 13;581(7807):184–9. doi: 10.1038/s41586-020-2270-4 (PMC7334196; doi:10.1038/s41586-020-2270-4)
Supplement: Supplementary file 9 — Source Data Extended Data Fig. 5 [file 41586_2020_2270_MOESM9_ESM.xlsx]

## Sheet: a
d N/d logd_p (cm^-3)
	d_p (nm)	2.7572	2.79202	2.82734	2.86317	2.89952	2.93639	2.9738	3.01175	3.05016	3.08903	3.12835	3.16813	3.20837	3.24907	3.29025	3.33189	3.37401	3.41661	3.45969	3.50326	3.54732	3.59187	3.63691	3.68246	3.7285	3.77506	3.82212	3.8697	3.9178	3.96642	4.01556	4.06533	4.11576	4.16688	4.21871	4.27126	4.32457	4.37864	4.43351	4.48919	4.54571	4.60308	4.66132	4.72047	4.78053	4.84153	4.90349	4.96643
Time (min)		2.7572	2.79202	2.82734	2.86317	2.89952	2.93639	2.9738	3.01175	3.05016	3.08903	3.12835	3.16813	3.20837	3.24907	3.29025	3.33189	3.37401	3.41661	3.45969	3.50326	3.54732	3.59187	3.63691	3.68246	3.7285	3.77506	3.82212	3.8697	3.9178	3.96642	4.01556	4.06533	4.11576	4.16688	4.21871	4.27126	4.32457	4.37864	4.43351	4.48919	4.54571	4.60308	4.66132	4.72047	4.78053	4.84153	4.90349	4.96643
0.98		1	1	1	1	1	1	1	1	1	1	1	1	1	1	1	1	1	1	1	1	1	1	1	1	1	1	1	1	1	1	1	1	1	1	1	1	1	1	1	1	1	1	1	1	1	1	1	1
3		1	1	1	1	1	1	1	1	1	1	1	1	1	1	1	1	1	1	1	1	1	1	1	1	1	1	1	1	1	1	1	1	1	1	1	1	1	1	1	1	1	1	1	1	1	1	1	1
5		1	1	1	1	1	1	1	1	1	1	1	1	1	1	1	1	1	1	1	1	1	1	1	1	1	1	1	1	1	1	1	1	1	1	1	1	1	1	1	1	1	1	1	1	1	1	1	1
7		57693.1	50539.8	43856.4	37663	31973.6	26796.6	22134.1	17982.3	14330.7	11162.8	8456.05	6182.58	4310.05	2802.61	1622	728.6	82.4664	1	1	1	1	1	1	1	1	1	1	1	1	1	1	1	1	1	1	1	1	1	1	1	1	1	1	1	1	1	1	1
9		340579	315820	290506	265000	239644	214751	190606	167463	145542	125026	106060	88745	73143.7	59277.8	47131.7	36656.6	27774.4	20382.3	14358.4	9566.17	5860.16	3090.92	1109.76	1	1	1	1	1	1	1	1	1	1	1	1	1	1	1	1	1	1	1	1	1	1	1	1	1
11		929191	906715	879490	847914	812437	773562	731829	687811	642098	595289	547975	500729	454090	408557	364578	322542	282779	245556	211077	179482	150848	125193	102476	82607.8	65455.4	50852.2	38605.2	28502.9	20323	13838.2	8822.77	5057.24	2333.11	456.236	1	1	1	1	1	1	1	1	1	1	1	1	1	1
12.98		997865	1001710	1002530	1000310	994989	986509	974809	959840	941572	920002	895167	867140	836045	802056	765399	726358	685267	642509	598508	553718	508615	463679	419388	376196	334528	294763	257232	222204	189886	160415	133861	110228	89461.9	71452.8	56049.4	43065.8	32292.6	23505.4	16473.9	10968.8	6767.8	3660.62	1452.36	1	1	1	1	1
14.98		850433	874116	895892	915497	932663	947124	958625	966924	971805	973080	970595	964240	953948	939709	921566	899628	874062	845104	813045	778228	741041	701899	661242	619513	577158	534610	492288	450583	409860	370447	332637	296680	262782	231105	201762	174820	150298	128174	108386	90840.4	75415.1	61970.2	50352.8	40404.1	31964.9	24879.5	18998.3	14179.1
16.98		668823	692219	716705	742496	769733	798462	828611	859984	892254	924967	957551	989331	1019550	1047410	1072070	1092720	1108610	1119020	1123400	1121290	1112390	1096580	1073910	1044590	1009020	967729	921414	870874	816993	760714	702996	644785	586983	530415	475808	423771	374790	329217	287278	249081	214625	183824	156519	132498	111517	93312.3	77614.2	64156.2
18.98		571550	599388	628310	658219	688997	720502	752578	785051	817731	850405	882837	914758	945864	975816	1004240	1030730	1054860	1076200	1094310	1108770	1119200	1125230	1126570	1122970	1114270	1100380	1081290	1057120	1028030	994326	956375	914639	869651	822001	772319	721252	669446	617528	566087	515663	466736	419721	374967	332751	293284	256710	223112	192513
21		464173	481269	499242	518260	538475	560015	582977	607421	633361	660760	689524	719494	750445	782083	814046	845909	877192	907377	935916	962251	985829	1006120	1022630	1034920	1042620	1045450	1043210	1035820	1023290	1005750	983404	956581	925679	891163	853550	813390	771244	727666	683195	638333	593543	549241	505793	463516	422682	383514	346193	310861
23		314722	327147	340390	354637	370056	386788	404942	424587	445755	468433	492567	518060	544769	572507	601041	630093	659344	688433	716969	744534	770692	795003	817031	836358	852600	865413	874507	879656	880706	877580	870282	858897	843589	824596	802219	776811	748767	718509	686473	653095	618801	583994	549049	514306	480064	446581	414070	382702
25		248609	259185	270669	283168	296788	311627	327774	345305	364280	384741	406701	430148	455030	481260	508703	537180	566463	596279	626311	656200	685558	713972	741014	766253	789270	809664	827073	841178	851718	858496	861386	860337	855374	846591	834151	818270	799215	777285	752808	726122	697573	667502	636243	604111	571410	538418	505393	472571
27		162765	171857	181167	190717	200542	210690	221224	232224	243787	256020	269042	282974	297933	314020	331310	349847	369632	390621	412719	435779	459603	483944	508507	532957	556929	580030	601859	622012	640103	655772	668707	678648	685407	688864	688976	685770	679339	669835	657455	642432	625026	605510	584169	561286	537145	512019	486171	459848
29		132428	137363	142543	148053	153983	160434	167505	175300	183920	193458	204000	215620	228378	242312	257444	273771	291267	309880	329535	350127	371530	393591	416133	438958	461845	484559	506849	528451	549098	568522	586460	602664	616906	628983	638720	645977	650648	652660	651980	648605	642570	633940	622813	609315	593601	575852	556267	535065
30.98		90774.3	94527.9	98620.3	103123	108100	113609	119698	126406	133765	141803	150543	160009	170222	181207	192988	205591	219040	233359	248571	264693	281733	299689	318541	338250	358748	379936	401679	423803	446099	468323	490202	511447	531761	550845	568415	584203	597970	609510	618654	625274	629287	630652	629370	625489	619091	610297	599257	586143
32.98		54212.2	56438	58854.7	61514.5	64468.8	67766.6	71453	75569.4	80152.7	85236.9	90853.7	97034	103808	111208	119264	128009	137470	147675	158642	170385	182903	196182	210195	224895	240218	256079	272375	288983	305761	322554	339190	355492	371275	386355	400551	413689	425609	436161	445217	452668	458427	462430	464642	465048	463663	460521	455680	449212
34.98		50511.5	53609.4	56860.4	60285	63908.8	67760.8	71871.9	76273.2	80994.6	86065.5	91514.1	97369	103660	110418	117677	125472	133839	142812	152422	162692	173636	185254	197532	210440	223933	237947	252405	267212	282263	297439	312616	327662	342444	356829	370687	383893	396329	407885	418461	427971	436339	443504	449419	454049	457369	459366	460032	459366
36.98		34232.6	34995.4	35791.3	36661.7	37652.6	38813.2	40194.4	41847.1	43821.2	46164.3	48921.6	52134.7	55841.5	60076.2	64868.7	70244.6	76224.9	82825.4	90056.4	97921.2	106416	115529	125240	135520	146332	157631	169366	181475	193894	206549	219362	232251	245128	257903	270482	282765	294650	306028	316787	326813	335990	344205	351349	357318	362021	365380	367331	367827
39		23536.4	25030.9	26616.3	28301.4	30096.1	32010.6	34055.8	36242.8	38583.2	41090	43778.1	46665.1	49772.2	53124.7	56752.9	60691.5	64981	69666.5	74797.8	80428.3	86613	93406.4	100860	109017	117913	127570	137994	149175	161084	173674	186881	200626	214812	229331	244062	258869	273611	288135	302285	315901	328827	340910	352011	362001	370766	378213	384262	388854
[truncated: 123 more columns]

## Sheet: b
T (°C)	[HNO3]×[NH3] (pptv^2)	d_act (nm)
+5	986311	2.3
+5	578560	3.9
+5	488224	4.7
+5	222740	9.4
+5	275720	10
+5	234982	10.4
-10	247380	1.6
-10	151744	2.1
-10	109019	2.4
-10	156586	2.9
-10	49848	4.5
-10	42205	4.5
-10	51144	4.6
-10	50820	4.9
-10	26608	5.9
-10	40560	6.5

## Sheet: c
T (°C)	d_s (nm)	SS	d_p (nm)
+5	1.4	5.95	1.93
+5	1.4	17.67	1.94
+5	1.4	46.37	1.96
+5	1.4	88.59	2.02
+5	1.4	95.68	2.19
+5	1.4	57.44	2.59
+5	1.4	24.63	3.47
+5	1.4	11.28	4.94
+5	1.4	6.29	7.18
+5	1.4	4.16	10.51
+5	1.4	3.13	15.41
+5	1.4	2.58	22.61
+5	1.4	2.26	33.19
+5	2	1.29	2.79
+5	2	3.83	2.8
+5	2	10.14	2.83
+5	2	20	2.92
+5	2	23.76	3.17
+5	2	17.71	3.78
+5	2	10.27	5.08
+5	2	6.12	7.25
+5	2	4.13	10.54
+5	2	3.12	15.42
+5	2	2.58	22.62
+5	2	2.26	33.19
+5	2.9	1.12	4.18
+5	2.9	3.04	4.22
+5	2.9	6.34	4.36
+5	2.9	8.44	4.71
+5	2.9	7.62	5.59
+5	2.9	5.59	7.47
+5	2.9	4.02	10.64
+5	2.9	3.1	15.47
+5	2.9	2.57	22.64
+5	2.9	2.25	33.2
-10	1.4	15.51	1.93
-10	1.4	45.84	1.94
-10	1.4	118.42	1.95
-10	1.4	218.39	2
-10	1.4	231.4	2.13
-10	1.4	154.67	2.45
-10	1.4	51.99	3.34
-10	1.4	20.85	4.81
-10	1.4	10.86	7.02
-10	1.4	6.9	10.29
-10	1.4	5.05	15.09
-10	1.4	4.08	22.14
-10	1.4	3.53	32.5
-10	2	0.96	2.78
-10	2	2.98	2.78
-10	2	8.82	2.79
-10	2	22.93	2.82
-10	2	43.28	2.89
-10	2	49.25	3.08
-10	2	39.39	3.57
-10	2	19.5	4.9
-10	2	10.63	7.06
-10	2	6.86	10.31
-10	2	5.04	15.1
-10	2	4.08	22.15
-10	2	3.53	32.5
-10	2.9	0.79	4.16
-10	2.9	2.37	4.17
-10	2.9	6.28	4.21
-10	2.9	12.5	4.32
-10	2.9	15.59	4.58
-10	2.9	14.78	5.27
-10	2.9	9.9	7.21
-10	2.9	6.7	10.37
-10	2.9	5.01	15.13
-10	2.9	4.07	22.16
-10	2.9	3.53	32.51
