# Supplementary material for: Rapid growth of new atmospheric particles by nitric acid and ammonia condensation
Source: Nature. 2020 May 13;581(7807):184–9. doi: 10.1038/s41586-020-2270-4 (PMC7334196; doi:10.1038/s41586-020-2270-4)
Supplement: Supplementary file 10 — Source Data Extended Data Fig. 6 [file 41586_2020_2270_MOESM10_ESM.xlsx]

## Sheet: ab
Time (s)	d_p (m)	H2O (wt %)	H2SO4 (wt %)	HNO3 (wt %)	NH3 (wt %)
5.99177	1.35999e-09	0.283056	0.51817	0.0154726	0.183301
6.00715	1.36002e-09	0.283076	0.518139	0.0154713	0.183313
6.02257	1.36003e-09	0.283074	0.518144	0.015471	0.183311
6.03803	1.36003e-09	0.283072	0.518148	0.0154707	0.18331
6.05353	1.36004e-09	0.283069	0.518152	0.0154705	0.183308
6.06907	1.36004e-09	0.283067	0.518156	0.0154703	0.183307
6.08464	1.36004e-09	0.283064	0.518161	0.01547	0.183305
6.10026	1.36005e-09	0.283062	0.518165	0.0154698	0.183304
6.11592	1.36005e-09	0.283059	0.518169	0.0154696	0.183302
6.13162	1.36006e-09	0.283057	0.518173	0.0154694	0.1833
6.14736	1.3601e-09	0.283084	0.518136	0.015468	0.183311
6.16314	1.3601e-09	0.283082	0.518141	0.0154679	0.18331
6.17896	1.3601e-09	0.283079	0.518145	0.0154677	0.183308
6.19482	1.36011e-09	0.283077	0.518149	0.0154676	0.183306
6.21072	1.36011e-09	0.283074	0.518153	0.0154675	0.183305
6.22666	1.36012e-09	0.283072	0.518158	0.0154673	0.183303
6.24264	1.36012e-09	0.283069	0.518162	0.0154672	0.183301
6.25867	1.36012e-09	0.283067	0.518166	0.0154671	0.1833
6.27473	1.36013e-09	0.283064	0.518171	0.015467	0.183298
6.29084	1.36016e-09	0.283085	0.518139	0.0154659	0.183311
6.30699	1.36017e-09	0.283082	0.518143	0.0154659	0.183309
6.32318	1.36017e-09	0.283079	0.518147	0.0154659	0.183307
6.33941	1.36018e-09	0.283077	0.518152	0.0154659	0.183306
6.35568	1.36018e-09	0.283074	0.518156	0.0154659	0.183304
6.37199	1.36018e-09	0.283072	0.51816	0.0154659	0.183302
6.38835	1.36019e-09	0.283069	0.518165	0.0154659	0.183301
6.40475	1.36019e-09	0.283066	0.518169	0.0154659	0.183299
6.42119	1.3602e-09	0.283064	0.518173	0.0154658	0.183297
6.43767	1.36024e-09	0.283091	0.518136	0.0154648	0.183308
6.45419	1.36024e-09	0.283088	0.518141	0.0154649	0.183306
6.47076	1.36025e-09	0.283086	0.518145	0.015465	0.183304
6.48737	1.36025e-09	0.283083	0.518149	0.0154651	0.183303
6.50402	1.36026e-09	0.28308	0.518154	0.0154652	0.183301
6.52072	1.36026e-09	0.283077	0.518158	0.0154653	0.183299
6.53745	1.36026e-09	0.283075	0.518162	0.0154654	0.183297
6.55423	1.36027e-09	0.283072	0.518167	0.0154655	0.183296
6.57106	1.36027e-09	0.283069	0.518171	0.0154655	0.183294
6.58792	1.36033e-09	0.283107	0.518117	0.0154641	0.183312
6.60483	1.36033e-09	0.283104	0.518121	0.0154644	0.18331
6.62179	1.36034e-09	0.283101	0.518126	0.0154647	0.183308
6.63879	1.36034e-09	0.283099	0.51813	0.015465	0.183306
6.65583	1.36035e-09	0.283096	0.518134	0.0154652	0.183305
6.67291	1.36035e-09	0.283093	0.518139	0.0154654	0.183303
6.69004	1.36036e-09	0.28309	0.518143	0.0154656	0.183301
6.70721	1.36036e-09	0.283087	0.518148	0.0154658	0.183299
6.72443	1.36036e-09	0.283085	0.518152	0.015466	0.183297
6.74169	1.3604e-09	0.283112	0.518116	0.0154653	0.183307
6.75899	1.36041e-09	0.283109	0.51812	0.0154658	0.183305
6.77634	1.36041e-09	0.283106	0.518125	0.0154662	0.183303
6.79374	1.36042e-09	0.283103	0.518129	0.0154666	0.183301
6.81117	1.36042e-09	0.2831	0.518134	0.015467	0.183299
6.82866	1.36043e-09	0.283097	0.518138	0.0154673	0.183297
6.84619	1.36043e-09	0.283095	0.518142	0.0154677	0.183295
6.86376	1.36044e-09	0.283092	0.518147	0.015468	0.183293
6.88138	1.36044e-09	0.283089	0.518151	0.0154683	0.183292
6.89904	1.36048e-09	0.283109	0.51812	0.0154679	0.183304
6.91675	1.36048e-09	0.283106	0.518124	0.0154685	0.183302
6.9345	1.36049e-09	0.283103	0.518128	0.0154691	0.1833
6.9523	1.36049e-09	0.2831	0.518133	0.0154697	0.183298
6.97015	1.3605e-09	0.283096	0.518137	0.0154702	0.183296
6.98804	1.3605e-09	0.283093	0.518142	0.0154707	0.183294
7.00598	1.36051e-09	0.28309	0.518146	0.0154712	0.183292
7.02396	1.36051e-09	0.283087	0.518151	0.0154717	0.18329
7.04199	1.36052e-09	0.283084	0.518155	0.0154721	0.183288
7.06007	1.36057e-09	0.283119	0.518105	0.0154713	0.183304
7.07819	1.36058e-09	0.283116	0.518109	0.0154721	0.183302
7.09636	1.36058e-09	0.283113	0.518114	0.0154729	0.1833
7.11457	1.36059e-09	0.28311	0.518118	0.0154736	0.183298
7.13283	1.36059e-09	0.283107	0.518122	0.0154743	0.183296
7.15114	1.3606e-09	0.283104	0.518127	0.015475	0.183294
7.1695	1.3606e-09	0.283101	0.518131	0.0154756	0.183292
7.1879	1.36061e-09	0.283097	0.518136	0.0154762	0.18329
7.20635	1.36061e-09	0.283094	0.518141	0.0154767	0.183288
7.22485	1.36066e-09	0.283123	0.5181	0.0154765	0.1833
7.24339	1.36066e-09	0.28312	0.518105	0.0154775	0.183298
7.26199	1.36067e-09	0.283117	0.518109	0.0154785	0.183296
7.28063	1.36067e-09	0.283114	0.518113	0.0154794	0.183294
7.29932	1.36068e-09	0.28311	0.518118	0.0154802	0.183292
7.31805	1.36068e-09	0.283107	0.518122	0.015481	0.183289
7.33684	1.36069e-09	0.283104	0.518127	0.0154818	0.183287
7.35567	1.36069e-09	0.283101	0.518132	0.0154825	0.183285
7.37455	1.3607e-09	0.283097	0.518136	0.0154832	0.183283
7.39348	1.36075e-09	0.283131	0.518089	0.015483	0.183297
7.41246	1.36075e-09	0.283128	0.518094	0.0154842	0.183294
7.43148	1.36076e-09	0.283124	0.518098	0.0154853	0.183292
7.45056	1.36076e-09	0.283121	0.518103	0.0154864	0.18329
7.46968	1.36077e-09	0.283118	0.518107	0.0154874	0.183288
7.48886	1.36077e-09	0.283114	0.518112	0.0154884	0.183286
7.50808	1.36078e-09	0.283111	0.518116	0.0154893	0.183284
7.52735	1.36079e-09	0.283108	0.518121	0.0154902	0.183281
7.54667	1.36079e-09	0.283104	0.518126	0.015491	0.183279
7.56604	1.36084e-09	0.283138	0.518078	0.015491	0.183293
7.58546	1.36085e-09	0.283134	0.518082	0.0154924	0.183291
7.60494	1.36085e-09	0.283131	0.518087	0.0154938	0.183289
7.62446	1.36086e-09	0.283127	0.518091	0.0154951	0.183287
7.64403	1.36086e-09	0.283124	0.518096	0.0154963	0.183284
7.66365	1.36087e-09	0.28312	0.5181	0.0154974	0.183282
7.68332	1.36088e-09	0.283117	0.518105	0.0154985	0.18328
7.70304	1.36088e-09	0.283113	0.51811	0.0154995	0.183278
7.72281	1.36089e-09	0.28311	0.518114	0.0155005	0.183276
7.74264	1.36093e-09	0.283129	0.518077	0.0154985	0.183296
7.76251	1.36093e-09	0.283126	0.518083	0.0154979	0.183294
7.78244	1.36094e-09	0.283123	0.518088	0.0154972	0.183292
7.80241	1.36094e-09	0.28312	0.518094	0.0154966	0.18329
7.82244	1.36095e-09	0.283116	0.518099	0.0154961	0.183288
7.84252	1.36095e-09	0.283113	0.518105	0.0154955	0.183286
7.86265	1.36096e-09	0.28311	0.51811	0.015495	0.183284
7.88283	1.36096e-09	0.283107	0.518116	0.0154945	0.183282
7.90307	1.36097e-09	0.283104	0.518122	0.015494	0.18328
7.92335	1.36103e-09	0.283142	0.518068	0.0154918	0.183298
7.94369	1.36103e-09	0.283139	0.518074	0.0154913	0.183296
7.96408	1.36104e-09	0.283136	0.518079	0.0154909	0.183294
7.98452	1.36104e-09	0.283133	0.518085	0.0154905	0.183292
8.00502	1.36105e-09	0.28313	0.518091	0.0154901	0.183289
8.02557	1.36105e-09	0.283127	0.518096	0.0154898	0.183287
8.04617	1.36106e-09	0.283123	0.518102	0.0154894	0.183285
8.06682	1.36106e-09	0.28312	0.518108	0.015489	0.183283
8.08752	1.36107e-09	0.283117	0.518113	0.0154887	0.183281
8.10828	1.36112e-09	0.283154	0.518061	0.0154867	0.183298
8.1291	1.36113e-09	0.283151	0.518067	0.0154865	0.183296
8.14996	1.36113e-09	0.283148	0.518072	0.0154863	0.183293
8.17088	1.36114e-09	0.283145	0.518078	0.0154861	0.183291
8.19186	1.36114e-09	0.283141	0.518084	0.0154859	0.183289
8.21288	1.36115e-09	0.283138	0.518089	0.0154857	0.183287
8.23396	1.36115e-09	0.283135	0.518095	0.0154854	0.183285
8.2551	1.36116e-09	0.283131	0.518101	0.0154852	0.183283
8.27629	1.36116e-09	0.283128	0.518106	0.0154851	0.183281
8.29753	1.3612e-09	0.283147	0.518076	0.015484	0.183293
8.31883	1.36121e-09	0.283144	0.518082	0.015484	0.18329
8.34019	1.36121e-09	0.283141	0.518087	0.015484	0.183288
8.36159	1.36122e-09	0.283137	0.518093	0.015484	0.183286
8.38306	1.36122e-09	0.283134	0.518099	0.0154839	0.183284
8.40457	1.36123e-09	0.28313	0.518104	0.0154839	0.183281
8.42615	1.36123e-09	0.283127	0.51811	0.0154839	0.183279
8.44778	1.36124e-09	0.283123	0.518116	0.0154838	0.183277
8.46946	1.36125e-09	0.28312	0.518122	0.0154838	0.183275
8.4912	1.3613e-09	0.283158	0.518068	0.0154823	0.183292
8.513	1.36131e-09	0.283154	0.518074	0.0154825	0.18329
8.53485	1.36131e-09	0.283151	0.518079	0.0154827	0.183287
8.55675	1.36132e-09	0.283147	0.518085	0.0154829	0.183285
8.57872	1.36133e-09	0.283143	0.518091	0.015483	0.183283
8.60074	1.36133e-09	0.28314	0.518097	0.0154832	0.18328
8.62282	1.36134e-09	0.283136	0.518102	0.0154833	0.183278
8.64495	1.36134e-09	0.283133	0.518108	0.0154834	0.183276
8.66714	1.36135e-09	0.283129	0.518114	0.0154835	0.183273
8.68939	1.36141e-09	0.283167	0.518061	0.0154823	0.18329
8.71169	1.36141e-09	0.283163	0.518066	0.0154828	0.183288
8.73405	1.36142e-09	0.283159	0.518072	0.0154833	0.183286
8.75647	1.36143e-09	0.283156	0.518078	0.0154837	0.183283
8.77895	1.36143e-09	0.283152	0.518083	0.0154841	0.183281
8.80148	1.36144e-09	0.283148	0.518089	0.0154844	0.183278
8.82407	1.36144e-09	0.283144	0.518095	0.0154848	0.183276
8.84672	1.36145e-09	0.283141	0.518101	0.0154851	0.183274
8.86943	1.36146e-09	0.283137	0.518106	0.0154853	0.183271
8.8922	1.36151e-09	0.283174	0.518054	0.0154844	0.183287
8.91502	1.36152e-09	0.28317	0.51806	0.0154852	0.183285
8.93791	1.36152e-09	0.283166	0.518066	0.0154859	0.183282
8.96085	1.36153e-09	0.283162	0.518071	0.0154865	0.18328
8.98385	1.36154e-09	0.283158	0.518077	0.0154872	0.183277
9.00691	1.36154e-09	0.283154	0.518083	0.0154877	0.183275
9.03003	1.36155e-09	0.283151	0.518089	0.0154882	0.183272
9.05321	1.36156e-09	0.283147	0.518095	0.0154887	0.18327
9.07645	1.36156e-09	0.283143	0.518101	0.0154891	0.183267
9.09974	1.36162e-09	0.28318	0.518047	0.0154885	0.183284
9.1231	1.36163e-09	0.283176	0.518053	0.0154896	0.183282
9.14652	1.36163e-09	0.283172	0.518058	0.0154905	0.183279
9.17	1.36164e-09	0.283168	0.518064	0.0154914	0.183276
9.19353	1.36165e-09	0.283164	0.51807	0.0154923	0.183274
9.21713	1.36165e-09	0.28316	0.518076	0.0154931	0.183271
9.24079	1.36166e-09	0.283156	0.518082	0.0154938	0.183269
9.26451	1.36167e-09	0.283152	0.518088	0.0154945	0.183266
9.28829	1.36167e-09	0.283148	0.518094	0.0154951	0.183263
9.31213	1.36173e-09	0.283185	0.51804	0.0154948	0.18328
9.33604	1.36174e-09	0.283181	0.518046	0.0154962	0.183277
9.36	1.36174e-09	0.283177	0.518051	0.0154974	0.183275
9.38403	1.36175e-09	0.283172	0.518057	0.0154986	0.183272
9.40811	1.36176e-09	0.283168	0.518063	0.0154997	0.183269
9.43226	1.36176e-09	0.283164	0.518069	0.0155007	0.183267
9.45647	1.36177e-09	0.28316	0.518075	0.0155017	0.183264
9.48075	1.36178e-09	0.283156	0.51808	0.0155025	0.183261
9.50508	1.36178e-09	0.283152	0.518087	0.0155033	0.183259
9.52948	1.36185e-09	0.283193	0.518027	0.0155032	0.183277
9.55394	1.36186e-09	0.283188	0.518033	0.0155049	0.183274
9.57847	1.36186e-09	0.283184	0.518038	0.0155065	0.183271
9.60305	1.36187e-09	0.283179	0.518044	0.0155079	0.183269
9.6277	1.36188e-09	0.283175	0.51805	0.0155093	0.183266
9.65241	1.36188e-09	0.283171	0.518056	0.0155105	0.183263
9.67719	1.36189e-09	0.283166	0.518062	0.0155117	0.18326
9.70203	1.3619e-09	0.283162	0.518068	0.0155128	0.183257
9.72693	1.3619e-09	0.283158	0.518074	0.0155138	0.183255
9.7519	1.36196e-09	0.283186	0.518023	0.0155112	0.18328
9.77693	1.36197e-09	0.283182	0.51803	0.0155104	0.183278
9.80203	1.36197e-09	0.283178	0.518037	0.0155097	0.183275
9.82719	1.36198e-09	0.283174	0.518044	0.015509	0.183273
9.85241	1.36199e-09	0.283171	0.518051	0.0155083	0.18327
9.8777	1.36199e-09	0.283167	0.518058	0.0155077	0.183268
9.90306	1.362e-09	0.283163	0.518065	0.0155071	0.183265
9.92848	1.362e-09	0.283159	0.518072	0.0155066	0.183263
9.95396	1.36201e-09	0.283155	0.518079	0.015506	0.18326
9.97951	1.36209e-09	0.28321	0.518005	0.0155031	0.183282
10.0051	1.36209e-09	0.283206	0.518012	0.0155026	0.18328
10.0308	1.3621e-09	0.283202	0.518019	0.0155022	0.183277
10.0566	1.36211e-09	0.283198	0.518026	0.0155017	0.183275
10.0824	1.36211e-09	0.283194	0.518033	0.0155013	0.183272
10.1083	1.36212e-09	0.28319	0.51804	0.0155009	0.18327
10.1342	1.36213e-09	0.283186	0.518047	0.0155006	0.183267
10.1602	1.36213e-09	0.283182	0.518054	0.0155002	0.183264
10.1863	1.36214e-09	0.283178	0.518061	0.0154998	0.183262
10.2124	1.3622e-09	0.283215	0.51801	0.015498	0.183277
10.2387	1.3622e-09	0.283211	0.518017	0.0154978	0.183275
10.2649	1.36221e-09	0.283207	0.518024	0.0154977	0.183272
10.2913	1.36222e-09	0.283203	0.518031	0.0154975	0.183269
10.3177	1.36222e-09	0.283198	0.518038	0.0154974	0.183266
10.3442	1.36223e-09	0.283194	0.518045	0.0154972	0.183264
10.3707	1.36224e-09	0.28319	0.518052	0.0154971	0.183261
10.3974	1.36225e-09	0.283186	0.518059	0.0154969	0.183258
10.424	1.36225e-09	0.283182	0.518066	0.0154967	0.183256
10.4508	1.36231e-09	0.283219	0.518014	0.0154952	0.183272
10.4776	1.36232e-09	0.283214	0.518021	0.0154954	0.183269
10.5045	1.36232e-09	0.28321	0.518028	0.0154956	0.183266
10.5315	1.36233e-09	0.283205	0.518035	0.0154957	0.183264
10.5585	1.36234e-09	0.283201	0.518042	0.0154958	0.183261
10.5856	1.36235e-09	0.283197	0.518049	0.0154959	0.183258
10.6128	1.36235e-09	0.283192	0.518056	0.015496	0.183255
10.64	1.36236e-09	0.283188	0.518064	0.0154961	0.183252
10.6673	1.36237e-09	0.283183	0.518071	0.0154961	0.18325
10.6947	1.36244e-09	0.283231	0.518002	0.0154945	0.183273
10.7222	1.36245e-09	0.283226	0.518009	0.0154951	0.18327
10.7497	1.36246e-09	0.283221	0.518016	0.0154956	0.183267
10.7773	1.36246e-09	0.283217	0.518023	0.0154961	0.183264
10.805	1.36247e-09	0.283212	0.51803	0.0154965	0.183262
10.8327	1.36248e-09	0.283208	0.518037	0.0154969	0.183259
10.8605	1.36249e-09	0.283203	0.518044	0.0154972	0.183256
10.8884	1.36249e-09	0.283199	0.518051	0.0154975	0.183253
10.9163	1.3625e-09	0.283194	0.518058	0.0154978	0.18325
10.9443	1.36257e-09	0.283242	0.517989	0.0154966	0.183272
10.9724	1.36258e-09	0.283238	0.517996	0.0154976	0.183269
11.0006	1.36259e-09	0.283233	0.518003	0.0154985	0.183266
11.0288	1.3626e-09	0.283228	0.51801	0.0154993	0.183263
11.0571	1.36261e-09	0.283223	0.518017	0.0155001	0.18326
11.0855	1.36261e-09	0.283218	0.518024	0.0155008	0.183257
11.114	1.36262e-09	0.283214	0.518031	0.0155014	0.183254
11.1425	1.36263e-09	0.283209	0.518038	0.015502	0.183251
11.1711	1.36264e-09	0.283204	0.518046	0.0155025	0.183248
11.1998	1.3627e-09	0.283246	0.517984	0.0155019	0.183268
11.2285	1.36271e-09	0.283241	0.51799	0.0155034	0.183265
11.2574	1.36272e-09	0.283236	0.517997	0.0155046	0.183262
11.2862	1.36273e-09	0.283231	0.518004	0.0155058	0.183258
11.3152	1.36274e-09	0.283226	0.518011	0.0155069	0.183255
11.3443	1.36274e-09	0.283221	0.518019	0.0155079	0.183252
11.3734	1.36275e-09	0.283216	0.518026	0.0155088	0.183249
11.4026	1.36276e-09	0.283212	0.518033	0.0155096	0.183246
11.4318	1.36277e-09	0.283207	0.51804	0.0155103	0.183243
11.4612	1.36285e-09	0.283259	0.517969	0.01551	0.183262
11.4906	1.36285e-09	0.283254	0.517976	0.0155118	0.183259
11.5201	1.36286e-09	0.283248	0.517982	0.0155135	0.183256
11.5497	1.36287e-09	0.283243	0.517989	0.0155151	0.183252
11.5793	1.36288e-09	0.283238	0.517997	0.0155165	0.183249
11.609	1.36289e-09	0.283233	0.518004	0.0155178	0.183246
11.6388	1.3629e-09	0.283228	0.518011	0.015519	0.183242
11.6687	1.3629e-09	0.283223	0.518018	0.01552	0.183239
11.6987	1.36291e-09	0.283217	0.518026	0.015521	0.183236
11.7287	1.36298e-09	0.283256	0.51796	0.0155177	0.183267
11.7588	1.36299e-09	0.283251	0.517968	0.0155167	0.183264
11.789	1.363e-09	0.283247	0.517977	0.0155158	0.183261
11.8192	1.36301e-09	0.283242	0.517985	0.015515	0.183258
11.8496	1.36301e-09	0.283237	0.517994	0.0155142	0.183255
11.88	1.36302e-09	0.283233	0.518002	0.0155134	0.183252
11.9105	1.36303e-09	0.283228	0.51801	0.0155127	0.183249
11.9411	1.36304e-09	0.283223	0.518019	0.015512	0.183246
11.9717	1.36304e-09	0.283218	0.518027	0.0155114	0.183243
12.0024	1.36312e-09	0.283272	0.51796	0.0155123	0.183256
12.0333	1.36313e-09	0.283267	0.517966	0.0155152	0.183252
12.0641	1.36314e-09	0.283261	0.517973	0.0155178	0.183248
12.0951	1.36315e-09	0.283255	0.51798	0.0155202	0.183245
12.1262	1.36315e-09	0.28325	0.517987	0.0155223	0.183241
12.1573	1.36316e-09	0.283244	0.517994	0.0155243	0.183238
12.1885	1.36317e-09	0.283239	0.518001	0.0155261	0.183234
12.2198	1.36318e-09	0.283233	0.518009	0.0155277	0.18323
12.2511	1.36319e-09	0.283228	0.518016	0.0155292	0.183227
12.2826	1.36327e-09	0.283275	0.517942	0.0155266	0.183257
12.3141	1.36328e-09	0.28327	0.51795	0.0155266	0.183254
12.3457	1.36329e-09	0.283265	0.517958	0.0155265	0.183251
12.3774	1.3633e-09	0.283259	0.517967	0.0155264	0.183247
12.4092	1.3633e-09	0.283254	0.517975	0.0155263	0.183244
12.441	1.36331e-09	0.283249	0.517984	0.0155262	0.183241
12.473	1.36332e-09	0.283244	0.517992	0.0155261	0.183238
12.505	1.36333e-09	0.283239	0.518001	0.015526	0.183234
12.5371	1.36334e-09	0.283234	0.518009	0.0155259	0.183231
12.5693	1.36341e-09	0.283281	0.517941	0.0155241	0.183254
12.6015	1.36342e-09	0.283276	0.517949	0.0155245	0.183251
12.6339	1.36343e-09	0.283271	0.517957	0.0155249	0.183247
12.6663	1.36344e-09	0.283265	0.517966	0.0155252	0.183244
12.6988	1.36345e-09	0.28326	0.517974	0.0155255	0.18324
12.7314	1.36345e-09	0.283255	0.517983	0.0155258	0.183237
12.7641	1.36346e-09	0.283249	0.517991	0.015526	0.183234
12.7969	1.36347e-09	0.283244	0.518	0.0155261	0.18323
12.8297	1.36348e-09	0.283239	0.518008	0.0155263	0.183227
12.8626	1.36357e-09	0.2833	0.517924	0.0155246	0.183252
12.8956	1.36358e-09	0.283294	0.517932	0.0155256	0.183248
12.9287	1.36359e-09	0.283289	0.51794	0.0155264	0.183245
12.9619	1.3636e-09	0.283283	0.517949	0.0155272	0.183241
12.9952	1.36361e-09	0.283278	0.517957	0.0155279	0.183238
13.0286	1.36362e-09	0.283272	0.517965	0.0155285	0.183234
13.062	1.36362e-09	0.283266	0.517974	0.0155291	0.18323
13.0955	1.36363e-09	0.283261	0.517983	0.0155296	0.183227
13.1291	1.36364e-09	0.283255	0.517991	0.01553	0.183223
13.1628	1.36372e-09	0.283306	0.517917	0.0155292	0.183248
13.1966	1.36373e-09	0.2833	0.517925	0.0155308	0.183244
13.2305	1.36374e-09	0.283294	0.517933	0.0155321	0.18324
13.2645	1.36375e-09	0.283289	0.517941	0.0155334	0.183237
13.2985	1.36376e-09	0.283283	0.51795	0.0155345	0.183233
13.3327	1.36377e-09	0.283277	0.517958	0.0155355	0.183229
13.3669	1.36378e-09	0.283271	0.517967	0.0155364	0.183226
13.4012	1.36379e-09	0.283265	0.517976	0.0155372	0.183222
13.4356	1.3638e-09	0.28326	0.517984	0.0155379	0.183218
13.4701	1.36389e-09	0.283318	0.517903	0.0155376	0.183241
13.5046	1.3639e-09	0.283312	0.517911	0.0155397	0.183237
13.5393	1.36391e-09	0.283305	0.517919	0.0155417	0.183234
13.5741	1.36392e-09	0.283299	0.517928	0.0155434	0.18323
13.6089	1.36393e-09	0.283293	0.517936	0.015545	0.183226
13.6438	1.36394e-09	0.283287	0.517944	0.0155464	0.183222
13.6789	1.36394e-09	0.283281	0.517953	0.0155476	0.183218
13.714	1.36395e-09	0.283275	0.517962	0.0155487	0.183214
13.7492	1.36396e-09	0.283269	0.51797	0.0155497	0.183211
13.7845	1.36405e-09	0.283318	0.517888	0.0155458	0.183248
13.8198	1.36406e-09	0.283313	0.517898	0.0155448	0.183244
13.8553	1.36407e-09	0.283307	0.517908	0.0155439	0.183241
13.8909	1.36408e-09	0.283302	0.517918	0.015543	0.183237
13.9265	1.36409e-09	0.283296	0.517928	0.0155422	0.183234
13.9623	1.3641e-09	0.283291	0.517937	0.0155414	0.18323
13.9981	1.36411e-09	0.283285	0.517947	0.0155407	0.183227
14.0341	1.36412e-09	0.28328	0.517957	0.01554	0.183223
14.0701	1.36412e-09	0.283274	0.517967	0.0155394	0.18322
14.1062	1.36421e-09	0.283328	0.517895	0.0155365	0.18324
14.1424	1.36421e-09	0.283322	0.517905	0.0155361	0.183237
14.1787	1.36422e-09	0.283317	0.517915	0.0155357	0.183233
14.2151	1.36423e-09	0.283311	0.517924	0.0155353	0.183229
14.2516	1.36424e-09	0.283305	0.517934	0.0155349	0.183226
14.2882	1.36425e-09	0.283299	0.517944	0.0155345	0.183222
14.3248	1.36426e-09	0.283294	0.517954	0.0155342	0.183218
14.3616	1.36427e-09	0.283288	0.517964	0.0155338	0.183215
14.3985	1.36428e-09	0.283282	0.517974	0.0155335	0.183211
14.4354	1.36437e-09	0.283339	0.51789	0.015531	0.183239
14.4725	1.36438e-09	0.283333	0.5179	0.0155312	0.183236
14.5096	1.36439e-09	0.283327	0.51791	0.0155314	0.183232
14.5469	1.3644e-09	0.283321	0.517919	0.0155315	0.183228
14.5842	1.36441e-09	0.283315	0.517929	0.0155316	0.183224
14.6217	1.36442e-09	0.283309	0.517939	0.0155317	0.18322
14.6592	1.36443e-09	0.283303	0.517949	0.0155317	0.183216
14.6968	1.36444e-09	0.283297	0.517959	0.0155317	0.183212
14.7345	1.36445e-09	0.283291	0.517969	0.0155317	0.183209
14.7724	1.36455e-09	0.283356	0.517879	0.0155298	0.183236
14.8103	1.36456e-09	0.283349	0.517888	0.0155306	0.183232
14.8483	1.36457e-09	0.283343	0.517898	0.0155314	0.183228
14.8864	1.36458e-09	0.283337	0.517907	0.0155321	0.183224
14.9246	1.36459e-09	0.28333	0.517917	0.0155327	0.18322
14.9629	1.3646e-09	0.283324	0.517927	0.0155332	0.183216
15.0013	1.36461e-09	0.283318	0.517937	0.0155336	0.183212
15.0398	1.36462e-09	0.283311	0.517947	0.015534	0.183208
15.0785	1.36463e-09	0.283305	0.517957	0.0155343	0.183204
15.1172	1.36472e-09	0.283363	0.517873	0.0155333	0.183231
15.156	1.36473e-09	0.283356	0.517882	0.0155349	0.183227
15.1949	1.36474e-09	0.283349	0.517891	0.0155364	0.183223
15.2339	1.36475e-09	0.283343	0.517901	0.0155376	0.183219
15.273	1.36476e-09	0.283336	0.517911	0.0155387	0.183214
15.3122	1.36477e-09	0.28333	0.517921	0.0155397	0.18321
15.3515	1.36478e-09	0.283323	0.51793	0.0155406	0.183206
15.3909	1.36479e-09	0.283316	0.51794	0.0155413	0.183202
15.4304	1.3648e-09	0.28331	0.517951	0.0155419	0.183198
15.47	1.36491e-09	0.283377	0.517854	0.0155415	0.183228
15.5097	1.36492e-09	0.28337	0.517863	0.0155439	0.183223
15.5495	1.36493e-09	0.283363	0.517872	0.015546	0.183219
15.5894	1.36494e-09	0.283356	0.517882	0.0155479	0.183214
15.6294	1.36495e-09	0.283349	0.517892	0.0155495	0.18321
15.6696	1.36496e-09	0.283342	0.517901	0.015551	0.183205
15.7098	1.36498e-09	0.283336	0.517911	0.0155522	0.183201
15.7501	1.36499e-09	0.283329	0.517921	0.0155534	0.183197
15.7905	1.365e-09	0.283322	0.517931	0.0155543	0.183192
15.8311	1.36509e-09	0.283378	0.517845	0.0155502	0.183227
15.8717	1.3651e-09	0.283372	0.517856	0.0155492	0.183223
15.9124	1.36511e-09	0.283365	0.517868	0.0155482	0.183219
15.9533	1.36512e-09	0.283359	0.517879	0.0155473	0.183215
15.9942	1.36513e-09	0.283353	0.51789	0.0155465	0.183211
16.0353	1.36514e-09	0.283346	0.517901	0.0155457	0.183207
16.0765	1.36515e-09	0.28334	0.517912	0.015545	0.183203
16.1177	1.36516e-09	0.283333	0.517924	0.0155444	0.183199
16.1591	1.36517e-09	0.283327	0.517935	0.0155438	0.183194
16.2006	1.36529e-09	0.283402	0.517829	0.01554	0.183229
16.2421	1.3653e-09	0.283395	0.517841	0.0155397	0.183225
16.2838	1.36531e-09	0.283388	0.517852	0.0155395	0.18322
16.3256	1.36532e-09	0.283382	0.517863	0.0155392	0.183216
16.3675	1.36533e-09	0.283375	0.517874	0.015539	0.183212
16.4096	1.36534e-09	0.283368	0.517885	0.0155387	0.183208
16.4517	1.36535e-09	0.283362	0.517896	0.0155384	0.183203
16.4939	1.36536e-09	0.283355	0.517908	0.0155382	0.183199
16.5362	1.36537e-09	0.283348	0.517919	0.0155379	0.183195
16.5787	1.36547e-09	0.283413	0.517831	0.0155356	0.183221
16.6212	1.36548e-09	0.283406	0.517842	0.0155361	0.183216
16.6639	1.36549e-09	0.283399	0.517853	0.0155366	0.183212
16.7067	1.3655e-09	0.283392	0.517864	0.015537	0.183207
16.7496	1.36552e-09	0.283385	0.517875	0.0155373	0.183203
16.7926	1.36553e-09	0.283378	0.517887	0.0155375	0.183198
16.8357	1.36554e-09	0.283371	0.517898	0.0155377	0.183194
16.8789	1.36555e-09	0.283364	0.517909	0.0155378	0.183189
16.9222	1.36556e-09	0.283357	0.51792	0.0155379	0.183185
16.9656	1.36567e-09	0.283423	0.51782	0.0155362	0.18322
17.0092	1.36568e-09	0.283416	0.517831	0.0155376	0.183216
17.0528	1.36569e-09	0.283409	0.517841	0.0155389	0.183211
17.0966	1.36571e-09	0.283401	0.517852	0.0155399	0.183206
17.1405	1.36572e-09	0.283394	0.517863	0.0155408	0.183202
17.1845	1.36573e-09	0.283387	0.517875	0.0155416	0.183197
17.2286	1.36574e-09	0.283379	0.517886	0.0155423	0.183192
17.2728	1.36575e-09	0.283372	0.517897	0.0155428	0.183188
17.3172	1.36576e-09	0.283365	0.517909	0.0155433	0.183183
17.3616	1.36588e-09	0.283437	0.517806	0.0155426	0.183214
17.4062	1.36589e-09	0.28343	0.517817	0.015545	0.183209
17.4509	1.3659e-09	0.283422	0.517827	0.015547	0.183204
17.4957	1.36591e-09	0.283414	0.517838	0.0155488	0.183199
17.5406	1.36593e-09	0.283406	0.517849	0.0155503	0.183194
17.5856	1.36594e-09	0.283399	0.51786	0.0155516	0.183189
17.6307	1.36595e-09	0.283391	0.517872	0.0155528	0.183184
17.676	1.36596e-09	0.283384	0.517883	0.0155537	0.18318
17.7214	1.36597e-09	0.283376	0.517895	0.0155546	0.183175
17.7668	1.36609e-09	0.28345	0.517788	0.0155549	0.183208
17.8125	1.3661e-09	0.283442	0.517798	0.0155583	0.183202
17.8582	1.36612e-09	0.283433	0.517808	0.0155613	0.183197
17.904	1.36613e-09	0.283425	0.517819	0.0155639	0.183192
17.95	1.36614e-09	0.283417	0.51783	0.0155661	0.183187
17.996	1.36616e-09	0.283409	0.517841	0.015568	0.183182
18.0422	1.36617e-09	0.283401	0.517852	0.0155697	0.183177
18.0885	1.36618e-09	0.283394	0.517864	0.0155711	0.183172
18.135	1.36619e-09	0.283386	0.517875	0.0155723	0.183167
18.1815	1.36631e-09	0.283455	0.517766	0.0155684	0.18321
18.2282	1.36632e-09	0.283448	0.517779	0.015568	0.183206
18.275	1.36634e-09	0.28344	0.517791	0.0155677	0.183201
18.3219	1.36635e-09	0.283433	0.517804	0.0155674	0.183196
18.3689	1.36636e-09	0.283425	0.517816	0.0155671	0.183191
18.4161	1.36637e-09	0.283418	0.517829	0.0155668	0.183187
18.4633	1.36638e-09	0.28341	0.517841	0.0155665	0.183182
18.5107	1.3664e-09	0.283403	0.517854	0.0155662	0.183177
18.5583	1.36641e-09	0.283395	0.517867	0.015566	0.183172
18.6059	1.36653e-09	0.283471	0.51776	0.0155632	0.183206
18.6536	1.36654e-09	0.283463	0.517772	0.0155639	0.183201
18.7015	1.36655e-09	0.283455	0.517784	0.0155645	0.183196
18.7495	1.36656e-09	0.283447	0.517797	0.015565	0.183191
18.7977	1.36658e-09	0.28344	0.517809	0.0155654	0.183186
18.8459	1.36659e-09	0.283432	0.517822	0.0155657	0.183181
18.8943	1.3666e-09	0.283424	0.517834	0.0155659	0.183176
18.9428	1.36661e-09	0.283416	0.517847	0.0155661	0.183171
18.9914	1.36663e-09	0.283408	0.51786	0.0155662	0.183166
19.0402	1.36675e-09	0.283489	0.51775	0.0155645	0.183197
19.089	1.36676e-09	0.283481	0.517761	0.0155663	0.183192
19.138	1.36677e-09	0.283472	0.517774	0.0155678	0.183186
19.1871	1.36679e-09	0.283464	0.517786	0.0155691	0.183181
19.2364	1.3668e-09	0.283456	0.517798	0.0155701	0.183176
19.2858	1.36681e-09	0.283448	0.517811	0.015571	0.183171
19.3353	1.36683e-09	0.283439	0.517823	0.0155718	0.183165
19.3849	1.36684e-09	0.283431	0.517836	0.0155724	0.18316
19.4347	1.36685e-09	0.283423	0.517849	0.0155728	0.183155
19.4846	1.36698e-09	0.283506	0.51773	0.0155723	0.183192
19.5346	1.367e-09	0.283497	0.517742	0.0155753	0.183186
19.5847	1.36701e-09	0.283488	0.517754	0.0155778	0.183181
19.635	1.36702e-09	0.283479	0.517766	0.0155799	0.183175
19.6854	1.36704e-09	0.283471	0.517778	0.0155817	0.18317
19.7359	1.36705e-09	0.283462	0.51779	0.0155833	0.183164
19.7866	1.36707e-09	0.283454	0.517803	0.0155846	0.183159
19.8374	1.36708e-09	0.283445	0.517816	0.0155856	0.183153
19.8883	1.36709e-09	0.283437	0.517829	0.0155865	0.183148
19.9393	1.36722e-09	0.283508	0.517718	0.0155818	0.183193
19.9905	1.36723e-09	0.2835	0.517732	0.0155808	0.183188
20.0418	1.36724e-09	0.283492	0.517746	0.01558	0.183183
20.0933	1.36725e-09	0.283484	0.51776	0.0155792	0.183177
20.1448	1.36727e-09	0.283476	0.517774	0.0155785	0.183172
20.1966	1.36728e-09	0.283468	0.517788	0.0155778	0.183167
20.2484	1.36729e-09	0.283459	0.517801	0.0155772	0.183162
20.3004	1.36731e-09	0.283451	0.517815	0.0155766	0.183157
20.3525	1.36732e-09	0.283443	0.517829	0.0155761	0.183152
20.4047	1.36745e-09	0.283528	0.517709	0.0155723	0.183191
20.4571	1.36746e-09	0.283519	0.517722	0.0155726	0.183186
20.5096	1.36748e-09	0.283511	0.517736	0.0155727	0.18318
20.5622	1.36749e-09	0.283502	0.51775	0.0155728	0.183175
20.615	1.36751e-09	0.283494	0.517764	0.0155728	0.18317
20.6679	1.36752e-09	0.283485	0.517778	0.0155728	0.183164
20.721	1.36753e-09	0.283477	0.517792	0.0155728	0.183159
20.7742	1.36755e-09	0.283468	0.517806	0.0155727	0.183153
20.8275	1.36756e-09	0.28346	0.51782	0.0155725	0.183148
20.881	1.36769e-09	0.283543	0.5177	0.0155703	0.183186
20.9346	1.36771e-09	0.283534	0.517713	0.0155718	0.183181
20.9883	1.36772e-09	0.283525	0.517727	0.015573	0.183175
21.0422	1.36774e-09	0.283516	0.51774	0.0155741	0.183169
21.0962	1.36775e-09	0.283507	0.517754	0.0155749	0.183164
21.1503	1.36776e-09	0.283499	0.517768	0.0155756	0.183158
21.2046	1.36778e-09	0.28349	0.517782	0.0155761	0.183152
21.2591	1.36779e-09	0.283481	0.517796	0.0155765	0.183147
21.3136	1.36781e-09	0.283472	0.51781	0.0155768	0.183141
21.3683	1.36794e-09	0.283563	0.517684	0.015576	0.183177
21.4232	1.36796e-09	0.283553	0.517697	0.0155789	0.183171
21.4782	1.36797e-09	0.283544	0.517711	0.0155813	0.183165
21.5333	1.36799e-09	0.283534	0.517724	0.0155833	0.183159
21.5886	1.36801e-09	0.283525	0.517738	0.015585	0.183153
21.644	1.36802e-09	0.283516	0.517751	0.0155864	0.183147
21.6995	1.36803e-09	0.283506	0.517765	0.0155875	0.183141
21.7552	1.36805e-09	0.283497	0.51778	0.0155884	0.183135
21.8111	1.36806e-09	0.283488	0.517794	0.0155892	0.183129
21.8671	1.36821e-09	0.283575	0.517665	0.01559	0.18317
21.9232	1.36822e-09	0.283565	0.517677	0.0155943	0.183164
21.9795	1.36824e-09	0.283555	0.51769	0.0155979	0.183157
22.0359	1.36825e-09	0.283545	0.517703	0.015601	0.183151
22.0925	1.36827e-09	0.283535	0.517717	0.0156036	0.183145
22.1492	1.36829e-09	0.283525	0.517731	0.0156057	0.183139
22.206	1.3683e-09	0.283516	0.517745	0.0156075	0.183132
22.263	1.36832e-09	0.283506	0.517759	0.0156089	0.183126
22.3202	1.36833e-09	0.283497	0.517773	0.0156101	0.18312
22.3775	1.36848e-09	0.283586	0.517637	0.0156059	0.183171
22.4349	1.36849e-09	0.283577	0.517652	0.0156061	0.183165
22.4925	1.36851e-09	0.283568	0.517667	0.0156063	0.183159
22.5502	1.36852e-09	0.283559	0.517682	0.0156063	0.183153
22.6081	1.36854e-09	0.283549	0.517698	0.0156063	0.183147
22.6661	1.36855e-09	0.28354	0.517713	0.0156063	0.183141
22.7243	1.36857e-09	0.283531	0.517728	0.0156062	0.183135
22.7826	1.36858e-09	0.283521	0.517743	0.0156061	0.183129
22.8411	1.3686e-09	0.283512	0.517759	0.0156059	0.183123
22.8998	1.36874e-09	0.283602	0.517629	0.0156037	0.183165
22.9585	1.36876e-09	0.283592	0.517644	0.0156054	0.183158
23.0175	1.36877e-09	0.283582	0.517659	0.0156068	0.183152
23.0765	1.36879e-09	0.283573	0.517674	0.0156079	0.183146
23.1358	1.3688e-09	0.283563	0.517689	0.0156088	0.18314
23.1952	1.36882e-09	0.283553	0.517704	0.0156096	0.183134
23.2547	1.36884e-09	0.283543	0.517719	0.0156101	0.183127
23.3144	1.36885e-09	0.283534	0.517735	0.0156105	0.183121
23.3742	1.36887e-09	0.283524	0.51775	0.0156108	0.183115
23.4342	1.36902e-09	0.283622	0.517612	0.0156102	0.183156
23.4944	1.36904e-09	0.283612	0.517626	0.0156135	0.183149
23.5547	1.36905e-09	0.283601	0.51764	0.0156163	0.183142
23.6152	1.36907e-09	0.283591	0.517655	0.0156185	0.183136
23.6758	1.36909e-09	0.283581	0.51767	0.0156204	0.183129
23.7365	1.3691e-09	0.283571	0.517685	0.0156219	0.183123
23.7975	1.36912e-09	0.283561	0.5177	0.0156231	0.183116
23.8586	1.36913e-09	0.283551	0.517716	0.0156241	0.18311
23.9198	1.36915e-09	0.28354	0.517731	0.0156248	0.183103
23.9812	1.3693e-09	0.283627	0.517595	0.0156192	0.183158
24.0428	1.36932e-09	0.283618	0.517612	0.0156184	0.183152
24.1045	1.36933e-09	0.283608	0.517629	0.0156176	0.183146
24.1663	1.36935e-09	0.283598	0.517645	0.0156168	0.18314
24.2284	1.36936e-09	0.283589	0.517662	0.0156162	0.183133
24.2906	1.36938e-09	0.283579	0.517678	0.0156155	0.183127
24.3529	1.36939e-09	0.283569	0.517695	0.015615	0.183121
24.4154	1.36941e-09	0.283559	0.517712	0.0156144	0.183115
24.4781	1.36943e-09	0.283549	0.517729	0.0156139	0.183108
24.5409	1.36958e-09	0.28365	0.517588	0.0156101	0.183152
24.6039	1.3696e-09	0.28364	0.517604	0.0156109	0.183145
24.6671	1.36961e-09	0.283629	0.517621	0.0156114	0.183139
24.7304	1.36963e-09	0.283619	0.517637	0.0156118	0.183132
24.7939	1.36965e-09	0.283609	0.517654	0.0156121	0.183126
24.8575	1.36966e-09	0.283599	0.51767	0.0156123	0.183119
24.9213	1.36968e-09	0.283588	0.517687	0.0156124	0.183112
24.9853	1.3697e-09	0.283578	0.517704	0.0156124	0.183106
25.0494	1.36971e-09	0.283568	0.51772	0.0156123	0.183099
25.1137	1.36988e-09	0.283674	0.51757	0.0156104	0.183146
25.1782	1.36989e-09	0.283663	0.517586	0.0156129	0.183139
25.2428	1.36991e-09	0.283652	0.517602	0.0156149	0.183132
25.3076	1.36993e-09	0.283641	0.517618	0.0156166	0.183125
25.3726	1.36995e-09	0.28363	0.517634	0.0156179	0.183118
25.4377	1.36996e-09	0.283619	0.517651	0.0156189	0.183111
25.503	1.36998e-09	0.283609	0.517667	0.0156196	0.183104
25.5684	1.37e-09	0.283598	0.517684	0.0156202	0.183097
25.6341	1.37002e-09	0.283587	0.517701	0.0156207	0.183091
25.6999	1.37018e-09	0.283693	0.51755	0.015621	0.183136
25.7658	1.3702e-09	0.283681	0.517565	0.0156253	0.183128
25.832	1.37022e-09	0.28367	0.51758	0.0156289	0.183121
25.8983	1.37024e-09	0.283658	0.517596	0.0156318	0.183114
25.9648	1.37026e-09	0.283647	0.517612	0.0156342	0.183106
26.0314	1.37027e-09	0.283636	0.517629	0.015636	0.183099
26.0982	1.37029e-09	0.283625	0.517645	0.0156375	0.183092
26.1652	1.37031e-09	0.283614	0.517662	0.0156387	0.183085
26.2324	1.37033e-09	0.283603	0.51768	0.0156396	0.183078
26.2997	1.3705e-09	0.283707	0.517522	0.0156345	0.183137
26.3672	1.37052e-09	0.283696	0.517539	0.0156347	0.18313
26.4349	1.37053e-09	0.283686	0.517557	0.0156347	0.183123
26.5028	1.37055e-09	0.283675	0.517575	0.0156347	0.183116
26.5708	1.37057e-09	0.283664	0.517593	0.0156346	0.183109
26.639	1.37059e-09	0.283653	0.517611	0.0156344	0.183102
26.7074	1.3706e-09	0.283642	0.517629	0.0156342	0.183095
26.7759	1.37062e-09	0.283631	0.517647	0.015634	0.183088
26.8446	1.37064e-09	0.28362	0.517665	0.0156337	0.183081
26.9136	1.37081e-09	0.283731	0.517509	0.0156311	0.183129
26.9826	1.37083e-09	0.283719	0.517526	0.0156332	0.183122
27.0519	1.37085e-09	0.283707	0.517543	0.0156348	0.183115
27.1213	1.37087e-09	0.283696	0.517561	0.0156361	0.183107
27.191	1.37089e-09	0.283685	0.517578	0.0156371	0.1831
27.2607	1.3709e-09	0.283673	0.517596	0.0156378	0.183093
27.3307	1.37092e-09	0.283662	0.517614	0.0156384	0.183086
27.4009	1.37094e-09	0.283651	0.517632	0.0156387	0.183078
27.4712	1.37096e-09	0.283639	0.517651	0.0156389	0.183071
27.5417	1.37113e-09	0.283745	0.517493	0.0156309	0.183131
27.6124	1.37115e-09	0.283734	0.517512	0.0156286	0.183125
27.6833	1.37117e-09	0.283724	0.517532	0.0156266	0.183118
27.7544	1.37118e-09	0.283713	0.517551	0.0156249	0.183111
27.8256	1.3712e-09	0.283702	0.517571	0.0156235	0.183104
27.897	1.37122e-09	0.283691	0.51759	0.0156222	0.183097
27.9686	1.37124e-09	0.28368	0.51761	0.0156211	0.18309
28.0404	1.37126e-09	0.283668	0.517629	0.0156201	0.183083
28.1124	1.37127e-09	0.283657	0.517648	0.0156192	0.183075
28.1846	1.37145e-09	0.283768	0.517495	0.0156219	0.183116
28.2569	1.37147e-09	0.283754	0.51751	0.0156282	0.183107
28.3294	1.37149e-09	0.283741	0.517527	0.0156332	0.183099
28.4021	1.37151e-09	0.283729	0.517543	0.0156373	0.183091
28.475	1.37153e-09	0.283716	0.517561	0.0156405	0.183083
28.5481	1.37155e-09	0.283704	0.517579	0.015643	0.183075
28.6214	1.37157e-09	0.283691	0.517597	0.015645	0.183067
28.6949	1.37159e-09	0.283679	0.517615	0.0156466	0.183059
28.7685	1.37161e-09	0.283667	0.517634	0.0156478	0.183052
28.8424	1.3718e-09	0.283785	0.517458	0.0156445	0.183113
28.9164	1.37182e-09	0.283773	0.517476	0.0156465	0.183105
28.9906	1.37184e-09	0.283761	0.517495	0.015648	0.183097
29.0651	1.37186e-09	0.283748	0.517514	0.0156492	0.183089
29.1397	1.37188e-09	0.283736	0.517533	0.0156501	0.183081
29.2145	1.3719e-09	0.283724	0.517552	0.0156507	0.183073
29.2894	1.37192e-09	0.283712	0.517571	0.0156511	0.183066
29.3646	1.37194e-09	0.2837	0.517591	0.0156514	0.183058
29.44	1.37196e-09	0.283688	0.51761	0.0156515	0.18305
29.5156	1.37215e-09	0.283807	0.517438	0.0156512	0.183104
29.5913	1.37217e-09	0.283794	0.517455	0.0156555	0.183096
29.6673	1.37219e-09	0.283781	0.517473	0.015659	0.183087
29.7434	1.37221e-09	0.283768	0.517492	0.0156616	0.183079
29.8198	1.37223e-09	0.283755	0.517511	0.0156637	0.183071
29.8963	1.37225e-09	0.283742	0.51753	0.0156653	0.183063
29.9731	1.37227e-09	0.28373	0.517549	0.0156665	0.183055
30.05	1.37229e-09	0.283717	0.517569	0.0156674	0.183047
30.1271	1.37231e-09	0.283705	0.517589	0.015668	0.183039
30.2045	1.3725e-09	0.283819	0.517414	0.0156622	0.183104
30.282	1.37252e-09	0.283807	0.517434	0.0156622	0.183097
30.3597	1.37254e-09	0.283795	0.517455	0.0156622	0.183089
30.4377	1.37256e-09	0.283782	0.517475	0.015662	0.183081
30.5158	1.37258e-09	0.28377	0.517496	0.0156618	0.183073
30.5941	1.3726e-09	0.283757	0.517516	0.0156615	0.183065
30.6726	1.37262e-09	0.283745	0.517537	0.0156612	0.183057
30.7514	1.37264e-09	0.283732	0.517558	0.0156609	0.183049
30.8303	1.37266e-09	0.28372	0.517579	0.0156605	0.183041
30.9095	1.37286e-09	0.283847	0.517402	0.0156577	0.183093
30.9888	1.37288e-09	0.283834	0.517422	0.0156601	0.183084
31.0683	1.3729e-09	0.28382	0.517442	0.0156619	0.183076
31.1481	1.37292e-09	0.283807	0.517462	0.0156633	0.183068
31.228	1.37294e-09	0.283794	0.517482	0.0156643	0.183059
31.3082	1.37296e-09	0.283781	0.517503	0.015665	0.183051
31.3886	1.37299e-09	0.283768	0.517524	0.0156654	0.183043
31.4691	1.37301e-09	0.283755	0.517544	0.0156657	0.183034
31.5499	1.37303e-09	0.283742	0.517566	0.0156658	0.183026
31.6309	1.37322e-09	0.283858	0.517393	0.0156576	0.183092
31.7121	1.37324e-09	0.283846	0.517415	0.0156556	0.183084
31.7935	1.37326e-09	0.283833	0.517437	0.0156539	0.183076
31.8751	1.37328e-09	0.283821	0.517459	0.0156524	0.183068
31.9569	1.3733e-09	0.283808	0.517481	0.0156512	0.18306
32.0389	1.37332e-09	0.283795	0.517503	0.0156501	0.183052
32.1212	1.37334e-09	0.283782	0.517525	0.0156491	0.183043
32.2036	1.37336e-09	0.283769	0.517547	0.0156483	0.183035
32.2863	1.37338e-09	0.283756	0.517569	0.0156475	0.183027
32.3692	1.3736e-09	0.283902	0.51737	0.0156508	0.183077
32.4522	1.37363e-09	0.283887	0.517387	0.0156586	0.183067
32.5355	1.37365e-09	0.283872	0.517406	0.0156646	0.183058
32.6191	1.37367e-09	0.283857	0.517425	0.0156693	0.183048
32.7028	1.3737e-09	0.283843	0.517445	0.0156729	0.183039
32.7867	1.37372e-09	0.283829	0.517466	0.0156757	0.18303
32.8709	1.37374e-09	0.283815	0.517486	0.0156778	0.183021
32.9553	1.37376e-09	0.283801	0.517508	0.0156793	0.183012
33.0399	1.37379e-09	0.283787	0.517529	0.0156805	0.183004
33.1247	1.374e-09	0.283913	0.517333	0.0156785	0.183076
33.2097	1.37403e-09	0.283899	0.517353	0.015682	0.183066
33.2949	1.37405e-09	0.283884	0.517374	0.0156847	0.183057
33.3804	1.37407e-09	0.28387	0.517395	0.0156866	0.183048
33.4661	1.37409e-09	0.283856	0.517417	0.0156881	0.183039
33.552	1.37412e-09	0.283842	0.517439	0.0156892	0.18303
33.6381	1.37414e-09	0.283828	0.517461	0.0156899	0.183021
33.7244	1.37416e-09	0.283814	0.517483	0.0156903	0.183012
33.811	1.37418e-09	0.2838	0.517506	0.0156906	0.183004
33.8978	1.3744e-09	0.283933	0.517309	0.0156828	0.183075
33.9848	1.37442e-09	0.28392	0.517332	0.0156819	0.183066
34.072	1.37445e-09	0.283906	0.517355	0.015681	0.183057
34.1595	1.37447e-09	0.283892	0.517379	0.0156802	0.183049
34.2472	1.37449e-09	0.283879	0.517402	0.0156795	0.18304
34.3351	1.37451e-09	0.283865	0.517425	0.0156788	0.183031
34.4232	1.37453e-09	0.283851	0.517449	0.0156782	0.183022
34.5116	1.37456e-09	0.283837	0.517472	0.0156776	0.183013
34.6002	1.37458e-09	0.283823	0.517495	0.0156769	0.183005
34.689	1.3748e-09	0.283966	0.517295	0.0156729	0.183066
34.778	1.37482e-09	0.283951	0.517317	0.0156749	0.183057
34.8673	1.37485e-09	0.283937	0.51734	0.0156764	0.183047
34.9568	1.37487e-09	0.283922	0.517362	0.0156774	0.183038
35.0465	1.3749e-09	0.283908	0.517386	0.015678	0.183029
35.1365	1.37492e-09	0.283893	0.517409	0.0156785	0.18302
35.2267	1.37494e-09	0.283879	0.517432	0.0156786	0.18301
35.3171	1.37496e-09	0.283864	0.517456	0.0156787	0.183001
35.4077	1.37499e-09	0.28385	0.517479	0.0156786	0.182992
35.4986	1.37522e-09	0.283995	0.517271	0.0156784	0.183056
35.5897	1.37524e-09	0.283979	0.517292	0.0156836	0.183045
35.6811	1.37527e-09	0.283963	0.517314	0.0156874	0.183035
35.7727	1.37529e-09	0.283947	0.517337	0.0156903	0.183026
35.8645	1.37532e-09	0.283932	0.517359	0.0156924	0.183016
35.9566	1.37534e-09	0.283917	0.517383	0.0156939	0.183006
36.0489	1.37537e-09	0.283902	0.517406	0.015695	0.182997
36.1414	1.37539e-09	0.283887	0.51743	0.0156956	0.182987
36.2342	1.37541e-09	0.283872	0.517454	0.015696	0.182978
36.3272	1.37565e-09	0.284014	0.517244	0.0156902	0.183052
36.4204	1.37567e-09	0.283999	0.517268	0.0156911	0.183042
36.5139	1.37569e-09	0.283984	0.517292	0.0156916	0.183033
36.6076	1.37572e-09	0.283969	0.517316	0.0156919	0.183023
36.7016	1.37574e-09	0.283954	0.517341	0.015692	0.183014
36.7958	1.37577e-09	0.283939	0.517365	0.0156919	0.183004
36.8903	1.37579e-09	0.283924	0.51739	0.0156917	0.182994
36.9849	1.37582e-09	0.283909	0.517415	0.0156915	0.182985
37.0799	1.37584e-09	0.283894	0.51744	0.0156911	0.182975
37.1751	1.37608e-09	0.284043	0.517226	0.0156896	0.183041
37.2705	1.3761e-09	0.284027	0.517249	0.0156938	0.183031
37.3661	1.37613e-09	0.284011	0.517272	0.0156969	0.18302
37.4621	1.37615e-09	0.283995	0.517296	0.0156991	0.18301
37.5582	1.37618e-09	0.283979	0.51732	0.0157007	0.183
37.6546	1.3762e-09	0.283963	0.517345	0.0157018	0.18299
37.7513	1.37623e-09	0.283948	0.51737	0.0157025	0.18298
37.8482	1.37626e-09	0.283932	0.517395	0.0157028	0.18297
37.9453	1.37628e-09	0.283917	0.51742	0.015703	0.18296
38.0427	1.37651e-09	0.284057	0.517212	0.0156959	0.183035
38.1404	1.37654e-09	0.284042	0.517237	0.0156958	0.183025
38.2383	1.37656e-09	0.284026	0.517263	0.0156955	0.183015
38.3364	1.37659e-09	0.28401	0.517289	0.0156952	0.183006
38.4348	1.37661e-09	0.283995	0.517315	0.0156948	0.182996
38.5335	1.37664e-09	0.283979	0.517341	0.0156944	0.182986
38.6324	1.37666e-09	0.283964	0.517367	0.0156939	0.182976
38.7316	1.37669e-09	0.283948	0.517393	0.0156934	0.182966
38.831	1.37671e-09	0.283932	0.517419	0.0156929	0.182956
38.9307	1.37697e-09	0.284098	0.51718	0.0156897	0.183032
39.0306	1.377e-09	0.284081	0.517204	0.0156932	0.183022
39.1308	1.37703e-09	0.284064	0.517229	0.0156957	0.183011
39.2312	1.37706e-09	0.284048	0.517254	0.0156975	0.183
39.3319	1.37708e-09	0.284031	0.51728	0.0156987	0.18299
39.4329	1.37711e-09	0.284015	0.517306	0.0156994	0.18298
39.5341	1.37713e-09	0.283999	0.517332	0.0156998	0.182969
39.6356	1.37716e-09	0.283983	0.517358	0.0157	0.182959
39.7373	1.37719e-09	0.283966	0.517385	0.0157	0.182949
39.8393	1.37743e-09	0.28412	0.517162	0.0157022	0.183016
39.9416	1.37746e-09	0.284102	0.517185	0.0157094	0.183004
40.0441	1.37749e-09	0.284084	0.517209	0.0157147	0.182993
40.1469	1.37752e-09	0.284067	0.517233	0.0157185	0.182982
40.2499	1.37755e-09	0.284049	0.517259	0.0157212	0.182971
40.3532	1.37758e-09	0.284032	0.517285	0.0157231	0.18296
40.4568	1.3776e-09	0.284016	0.517311	0.0157243	0.182949
40.5607	1.37763e-09	0.283999	0.517338	0.0157251	0.182939
40.6648	1.37766e-09	0.283982	0.517364	0.0157256	0.182928
40.7692	1.37793e-09	0.284149	0.517117	0.0157216	0.183013
40.8738	1.37796e-09	0.284131	0.517142	0.0157247	0.183002
40.9787	1.37798e-09	0.284114	0.517169	0.0157269	0.182991
41.0839	1.37801e-09	0.284097	0.517195	0.0157284	0.18298
41.1894	1.37804e-09	0.28408	0.517222	0.0157293	0.182969
41.2951	1.37807e-09	0.284063	0.517249	0.0157299	0.182958
41.4011	1.37809e-09	0.284046	0.517277	0.0157301	0.182947
41.5074	1.37812e-09	0.284029	0.517304	0.0157301	0.182937
41.6139	1.37815e-09	0.284012	0.517332	0.01573	0.182926
41.7207	1.3784e-09	0.284163	0.517111	0.0157212	0.183005
41.8278	1.37843e-09	0.284146	0.517139	0.0157202	0.182994
41.9352	1.37845e-09	0.284129	0.517168	0.0157192	0.182984
42.0428	1.37848e-09	0.284113	0.517196	0.0157184	0.182973
42.1507	1.37851e-09	0.284096	0.517224	0.0157176	0.182962
42.2589	1.37853e-09	0.284079	0.517253	0.0157168	0.182952
42.3674	1.37856e-09	0.284062	0.517282	0.0157161	0.182941
42.4762	1.37859e-09	0.284045	0.51731	0.0157154	0.18293
42.5852	1.37862e-09	0.284027	0.517339	0.0157147	0.182919
42.6945	1.3789e-09	0.284209	0.517081	0.0157104	0.182999
42.8041	1.37893e-09	0.284191	0.517108	0.0157134	0.182987
42.914	1.37896e-09	0.284173	0.517136	0.0157155	0.182976
43.0241	1.37899e-09	0.284155	0.517164	0.0157168	0.182964
43.1345	1.37902e-09	0.284137	0.517192	0.0157176	0.182953
43.2453	1.37905e-09	0.28412	0.51722	0.0157181	0.182942
43.3563	1.37907e-09	0.284102	0.517249	0.0157182	0.182931
43.4676	1.3791e-09	0.284084	0.517278	0.0157181	0.182919
43.5791	1.37913e-09	0.284067	0.517307	0.0157179	0.182908
43.691	1.37941e-09	0.28424	0.517052	0.0157196	0.182988
43.8031	1.37944e-09	0.28422	0.517078	0.015727	0.182976
43.9156	1.37948e-09	0.2842	0.517104	0.0157321	0.182963
44.0283	1.37951e-09	0.284181	0.517132	0.0157358	0.182951
44.1413	1.37954e-09	0.284163	0.51716	0.0157382	0.18294
44.2546	1.37957e-09	0.284144	0.517188	0.0157399	0.182928
44.3682	1.3796e-09	0.284126	0.517217	0.0157409	0.182916
44.4821	1.37963e-09	0.284108	0.517246	0.0157414	0.182905
44.5963	1.37965e-09	0.284089	0.517276	0.0157416	0.182893
44.7107	1.37994e-09	0.284265	0.517015	0.0157379	0.182982
44.8255	1.37997e-09	0.284245	0.517043	0.0157413	0.18297
44.9406	1.38e-09	0.284227	0.517072	0.0157437	0.182958
45.0559	1.38004e-09	0.284208	0.517101	0.0157452	0.182946
45.1716	1.38007e-09	0.284189	0.517131	0.0157461	0.182934
45.2875	1.3801e-09	0.284171	0.517161	0.0157466	0.182922
45.4038	1.38012e-09	0.284152	0.517191	0.0157467	0.18291
45.5203	1.38015e-09	0.284134	0.517221	0.0157466	0.182899
45.6372	1.38018e-09	0.284115	0.517251	0.0157464	0.182887
45.7543	1.38048e-09	0.284299	0.516985	0.0157489	0.182967
45.8718	1.38051e-09	0.284278	0.517012	0.015757	0.182954
45.9895	1.38055e-09	0.284257	0.517039	0.0157626	0.182941
46.1075	1.38058e-09	0.284237	0.517068	0.0157665	0.182928
46.2259	1.38061e-09	0.284218	0.517097	0.0157691	0.182916
46.3445	1.38064e-09	0.284199	0.517127	0.0157708	0.182903
46.4635	1.38067e-09	0.284179	0.517158	0.0157718	0.182891
46.5828	1.3807e-09	0.28416	0.517188	0.0157723	0.182879
46.7023	1.38073e-09	0.284141	0.517219	0.0157725	0.182867
46.8222	1.38103e-09	0.284322	0.516949	0.0157697	0.182959
46.9424	1.38107e-09	0.284302	0.516978	0.0157739	0.182946
47.0629	1.3811e-09	0.284282	0.517008	0.0157768	0.182933
47.1837	1.38113e-09	0.284262	0.517038	0.0157787	0.182921
47.3048	1.38116e-09	0.284243	0.517069	0.0157798	0.182908
47.4262	1.38119e-09	0.284224	0.5171	0.0157804	0.182896
47.548	1.38122e-09	0.284204	0.517131	0.0157806	0.182884
47.67	1.38126e-09	0.284185	0.517163	0.0157806	0.182872
47.7924	1.38129e-09	0.284165	0.517195	0.0157803	0.182859
47.9151	1.38159e-09	0.284359	0.516917	0.015772	0.182953
48.0381	1.38163e-09	0.284339	0.516948	0.0157725	0.18294
48.1614	1.38166e-09	0.284319	0.51698	0.0157727	0.182928
48.285	1.38169e-09	0.2843	0.517012	0.0157727	0.182915
48.4089	1.38172e-09	0.28428	0.517045	0.0157724	0.182903
48.5332	1.38175e-09	0.284261	0.517077	0.015772	0.18289
48.6578	1.38178e-09	0.284241	0.51711	0.0157715	0.182878
48.7827	1.38182e-09	0.284221	0.517142	0.0157709	0.182865
48.9079	1.38185e-09	0.284202	0.517175	0.0157703	0.182853
49.0334	1.38216e-09	0.284399	0.51689	0.0157689	0.182942
49.1593	1.3822e-09	0.284378	0.51692	0.0157745	0.182928
49.2855	1.38223e-09	0.284356	0.51695	0.0157782	0.182915
49.412	1.38227e-09	0.284336	0.516982	0.0157806	0.182902
49.5388	1.3823e-09	0.284315	0.517014	0.0157821	0.182889
49.666	1.38233e-09	0.284295	0.517047	0.0157829	0.182876
49.7934	1.38237e-09	0.284275	0.517079	0.0157833	0.182863
49.9213	1.3824e-09	0.284254	0.517113	0.0157833	0.18285
50.0494	1.38243e-09	0.284234	0.517146	0.0157831	0.182837
50.1779	1.38275e-09	0.284429	0.516857	0.0157765	0.182938
50.3067	1.38279e-09	0.284408	0.516889	0.0157786	0.182924
50.4358	1.38282e-09	0.284387	0.516922	0.0157798	0.182911
50.5652	1.38285e-09	0.284367	0.516955	0.0157804	0.182898
50.695	1.38289e-09	0.284346	0.516988	0.0157807	0.182885
50.8252	1.38292e-09	0.284325	0.517022	0.0157806	0.182872
50.9556	1.38295e-09	0.284305	0.517056	0.0157803	0.182859
51.0864	1.38299e-09	0.284284	0.51709	0.0157798	0.182846
51.2176	1.38302e-09	0.284264	0.517124	0.0157793	0.182833
51.349	1.38335e-09	0.28447	0.516829	0.0157805	0.18292
51.4808	1.38339e-09	0.284447	0.516859	0.015788	0.182905
51.613	1.38342e-09	0.284425	0.516891	0.015793	0.182891
51.7455	1.38346e-09	0.284403	0.516923	0.0157962	0.182877
51.8783	1.38349e-09	0.284381	0.516957	0.0157982	0.182864
52.0114	1.38353e-09	0.28436	0.516991	0.0157993	0.18285
52.1449	1.38356e-09	0.284339	0.517025	0.0157999	0.182837
52.2788	1.3836e-09	0.284317	0.51706	0.0158	0.182823
52.413	1.38363e-09	0.284296	0.517094	0.0157999	0.18281
52.5475	1.38397e-09	0.284498	0.516792	0.015796	0.182914
52.6824	1.384e-09	0.284475	0.516825	0.0158002	0.1829
52.8176	1.38404e-09	0.284453	0.516858	0.0158028	0.182886
52.9532	1.38407e-09	0.284431	0.516893	0.0158044	0.182872
53.0891	1.38411e-09	0.284409	0.516927	0.0158052	0.182858
53.2254	1.38414e-09	0.284388	0.516963	0.0158055	0.182844
53.362	1.38418e-09	0.284366	0.516998	0.0158054	0.182831
53.499	1.38421e-09	0.284344	0.517034	0.0158052	0.182817
53.6363	1.38425e-09	0.284323	0.517069	0.0158047	0.182803
53.774	1.3846e-09	0.284538	0.516756	0.0158092	0.182897
53.912	1.38464e-09	0.284513	0.516786	0.0158192	0.182881
54.0504	1.38467e-09	0.28449	0.516819	0.0158257	0.182866
54.1891	1.38471e-09	0.284466	0.516852	0.01583	0.182851
54.3282	1.38475e-09	0.284444	0.516887	0.0158326	0.182837
54.4677	1.38479e-09	0.284421	0.516922	0.0158341	0.182822
54.6075	1.38482e-09	0.284399	0.516958	0.0158349	0.182808
54.7477	1.38486e-09	0.284377	0.516994	0.0158352	0.182794
54.8882	1.38489e-09	0.284354	0.51703	0.0158351	0.18278
55.0291	1.38524e-09	0.284561	0.516722	0.0158215	0.182896
55.1703	1.38527e-09	0.28454	0.516759	0.0158192	0.182882
55.312	1.38531e-09	0.284518	0.516797	0.0158173	0.182868
55.4539	1.38535e-09	0.284496	0.516834	0.0158158	0.182854
55.5963	1.38538e-09	0.284474	0.516872	0.0158145	0.18284
55.739	1.38542e-09	0.284451	0.516909	0.0158134	0.182826
55.882	1.38545e-09	0.284429	0.516947	0.0158123	0.182812
56.0255	1.38549e-09	0.284407	0.516984	0.0158113	0.182798
56.1693	1.38553e-09	0.284384	0.517022	0.0158104	0.182783
56.3135	1.38588e-09	0.284609	0.516703	0.0158056	0.182882
56.458	1.38592e-09	0.284585	0.516738	0.0158094	0.182867
56.6029	1.38596e-09	0.284562	0.516775	0.0158117	0.182852
56.7482	1.386e-09	0.284539	0.516812	0.015813	0.182837
56.8939	1.38603e-09	0.284515	0.516849	0.0158135	0.182822
57.0399	1.38607e-09	0.284492	0.516887	0.0158136	0.182807
57.1863	1.38611e-09	0.284469	0.516925	0.0158134	0.182793
57.3331	1.38615e-09	0.284446	0.516963	0.0158129	0.182778
57.4803	1.38618e-09	0.284423	0.517001	0.0158124	0.182764
57.6278	1.38656e-09	0.284655	0.516662	0.0158168	0.182867
57.7758	1.3866e-09	0.284628	0.516695	0.015827	0.18285
57.9241	1.38664e-09	0.284603	0.51673	0.0158336	0.182834
58.0727	1.38668e-09	0.284578	0.516766	0.0158376	0.182818
58.2218	1.38672e-09	0.284554	0.516803	0.01584	0.182803
58.3713	1.38676e-09	0.28453	0.516841	0.0158413	0.182788
58.5211	1.3868e-09	0.284506	0.516879	0.0158419	0.182773
58.6713	1.38684e-09	0.284482	0.516918	0.015842	0.182757
58.8219	1.38688e-09	0.284459	0.516957	0.0158417	0.182742
58.9729	1.38726e-09	0.284693	0.51661	0.0158419	0.182854
59.1243	1.3873e-09	0.284667	0.516645	0.0158495	0.182838
59.276	1.38734e-09	0.284642	0.516682	0.0158542	0.182822
59.4282	1.38739e-09	0.284617	0.51672	0.0158569	0.182806
59.5807	1.38742e-09	0.284593	0.516758	0.0158585	0.182791
59.7337	1.38746e-09	0.284568	0.516797	0.0158592	0.182775
59.887	1.3875e-09	0.284544	0.516837	0.0158593	0.18276
60.0407	1.38754e-09	0.28452	0.516877	0.0158591	0.182744
60.1948	1.38758e-09	0.284496	0.516917	0.0158586	0.182729
60.3493	1.38797e-09	0.284732	0.516565	0.0158548	0.182848
60.5042	1.38802e-09	0.284706	0.516602	0.0158597	0.182832
60.6595	1.38806e-09	0.284681	0.51664	0.0158626	0.182816
60.8152	1.3881e-09	0.284656	0.51668	0.0158642	0.1828
60.9713	1.38814e-09	0.284631	0.51672	0.015865	0.182784
61.1279	1.38818e-09	0.284607	0.51676	0.0158651	0.182768
61.2848	1.38822e-09	0.284582	0.5168	0.0158649	0.182753
61.4421	1.38826e-09	0.284557	0.516841	0.0158644	0.182737
61.5998	1.3883e-09	0.284533	0.516882	0.0158638	0.182722
61.7579	1.38868e-09	0.28477	0.516539	0.0158563	0.182835
61.9164	1.38872e-09	0.284744	0.516579	0.0158588	0.182819
62.0753	1.38877e-09	0.284718	0.516619	0.01586	0.182803
62.2347	1.38881e-09	0.284693	0.51666	0.0158605	0.182787
62.3944	1.38885e-09	0.284668	0.516701	0.0158605	0.182771
62.5546	1.38889e-09	0.284643	0.516742	0.0158601	0.182755
62.7152	1.38893e-09	0.284618	0.516784	0.0158596	0.182739
62.8761	1.38897e-09	0.284593	0.516826	0.0158589	0.182723
63.0375	1.38901e-09	0.284567	0.516868	0.0158581	0.182707
63.1993	1.38942e-09	0.284817	0.5165	0.0158613	0.182821
63.3616	1.38947e-09	0.284789	0.516537	0.015871	0.182803
63.5242	1.38951e-09	0.284762	0.516576	0.0158768	0.182786
63.6873	1.38955e-09	0.284735	0.516616	0.0158803	0.182769
63.8507	1.3896e-09	0.284709	0.516657	0.0158821	0.182752
64.0146	1.38964e-09	0.284683	0.516699	0.0158829	0.182736
64.1789	1.38968e-09	0.284657	0.516741	0.0158831	0.182719
64.3437	1.38972e-09	0.284631	0.516784	0.0158829	0.182703
64.5088	1.38976e-09	0.284605	0.516826	0.0158824	0.182686
64.6744	1.39018e-09	0.284858	0.516452	0.0158822	0.182808
64.8404	1.39023e-09	0.28483	0.51649	0.0158899	0.18279
65.0069	1.39027e-09	0.284802	0.516531	0.0158944	0.182773
65.1737	1.39032e-09	0.284775	0.516572	0.0158969	0.182756
65.341	1.39036e-09	0.284749	0.516615	0.0158981	0.182739
65.5087	1.3904e-09	0.284722	0.516658	0.0158985	0.182722
65.6769	1.39045e-09	0.284696	0.516701	0.0158984	0.182705
65.8455	1.39049e-09	0.284669	0.516745	0.0158979	0.182688
66.0145	1.39053e-09	0.284643	0.516788	0.0158973	0.182672
66.1839	1.39096e-09	0.284903	0.516403	0.0158938	0.1828
66.3538	1.39101e-09	0.284875	0.516444	0.0158995	0.182782
66.5241	1.39105e-09	0.284847	0.516486	0.0159027	0.182764
66.6949	1.3911e-09	0.284819	0.516529	0.0159043	0.182747
66.8661	1.39114e-09	0.284792	0.516573	0.015905	0.18273
67.0377	1.39118e-09	0.284765	0.516617	0.015905	0.182713
67.2098	1.39123e-09	0.284738	0.516662	0.0159046	0.182695
67.3823	1.39127e-09	0.284711	0.516706	0.015904	0.182678
67.5553	1.39132e-09	0.284684	0.516751	0.0159032	0.182661
67.7287	1.39175e-09	0.284955	0.51636	0.0158968	0.182789
67.9025	1.3918e-09	0.284927	0.516402	0.0159006	0.182771
68.0768	1.39184e-09	0.284899	0.516446	0.0159027	0.182753
68.2516	1.39189e-09	0.284871	0.516491	0.0159035	0.182735
68.4268	1.39193e-09	0.284843	0.516535	0.0159037	0.182718
68.6024	1.39198e-09	0.284816	0.516581	0.0159034	0.1827
68.7785	1.39202e-09	0.284788	0.516626	0.0159028	0.182683
68.955	1.39207e-09	0.284761	0.516672	0.015902	0.182665
69.132	1.39211e-09	0.284733	0.516718	0.0159011	0.182648
69.3095	1.39256e-09	0.285004	0.51632	0.0159079	0.182768
69.4874	1.39261e-09	0.284973	0.516359	0.0159199	0.182748
69.6658	1.39266e-09	0.284943	0.516401	0.0159269	0.182729
69.8446	1.39271e-09	0.284914	0.516445	0.0159308	0.18271
70.0239	1.39275e-09	0.284885	0.51649	0.0159328	0.182692
70.2036	1.3928e-09	0.284856	0.516536	0.0159336	0.182674
70.3838	1.39284e-09	0.284828	0.516582	0.0159337	0.182656
70.5645	1.39289e-09	0.2848	0.516629	0.0159333	0.182638
70.7456	1.39294e-09	0.284772	0.516676	0.0159327	0.18262
70.9272	1.39338e-09	0.285034	0.516283	0.0159212	0.182762
71.1092	1.39343e-09	0.285005	0.516329	0.015922	0.182744
71.2918	1.39347e-09	0.284977	0.516376	0.0159221	0.182725
71.4748	1.39352e-09	0.284948	0.516423	0.0159217	0.182707
71.6582	1.39357e-09	0.284919	0.51647	0.0159211	0.182689
71.8422	1.39361e-09	0.284891	0.516518	0.0159202	0.182671
72.0266	1.39366e-09	0.284862	0.516566	0.0159193	0.182653
72.2115	1.39371e-09	0.284833	0.516614	0.0159183	0.182635
72.3968	1.39375e-09	0.284805	0.516662	0.0159173	0.182616
72.5826	1.39422e-09	0.285095	0.516243	0.0159194	0.182743
72.769	1.39427e-09	0.285063	0.516286	0.0159288	0.182722
72.9557	1.39432e-09	0.285032	0.516331	0.015934	0.182703
73.143	1.39437e-09	0.285002	0.516378	0.0159367	0.182684
73.3308	1.39442e-09	0.284972	0.516425	0.0159379	0.182665
73.519	1.39447e-09	0.284942	0.516473	0.0159382	0.182646
73.7077	1.39452e-09	0.284913	0.516522	0.0159379	0.182628
73.8969	1.39456e-09	0.284883	0.516571	0.0159373	0.182609
74.0866	1.39461e-09	0.284854	0.51662	0.0159365	0.18259
74.2767	1.3951e-09	0.285149	0.516182	0.0159367	0.182732
74.4674	1.39515e-09	0.285117	0.516227	0.0159451	0.182712
74.6585	1.3952e-09	0.285085	0.516273	0.0159498	0.182692
74.8502	1.39525e-09	0.285055	0.516321	0.0159521	0.182672
75.0423	1.3953e-09	0.285024	0.51637	0.015953	0.182653
75.2349	1.39535e-09	0.284994	0.516419	0.015953	0.182634
75.428	1.3954e-09	0.284964	0.516469	0.0159526	0.182615
75.6217	1.39545e-09	0.284934	0.516519	0.0159519	0.182596
75.8158	1.3955e-09	0.284904	0.516569	0.015951	0.182577
76.0104	1.39599e-09	0.285199	0.516133	0.01595	0.182718
76.2055	1.39604e-09	0.285166	0.516179	0.0159577	0.182697
76.4011	1.39609e-09	0.285134	0.516227	0.0159618	0.182677
76.5972	1.39614e-09	0.285103	0.516276	0.0159637	0.182657
76.7938	1.3962e-09	0.285072	0.516326	0.0159643	0.182637
76.9909	1.39625e-09	0.285041	0.516377	0.0159642	0.182618
77.1886	1.3963e-09	0.28501	0.516428	0.0159637	0.182598
77.3867	1.39635e-09	0.28498	0.516479	0.0159629	0.182579
77.5853	1.3964e-09	0.284949	0.51653	0.0159619	0.182559
77.7845	1.39689e-09	0.285243	0.516096	0.0159602	0.182701
77.9841	1.39694e-09	0.285209	0.516144	0.0159673	0.18268
78.1843	1.39699e-09	0.285177	0.516193	0.015971	0.182659
78.385	1.39704e-09	0.285145	0.516243	0.0159726	0.182639
78.5862	1.3971e-09	0.285113	0.516295	0.0159731	0.182619
78.7879	1.39715e-09	0.285082	0.516346	0.0159728	0.182599
78.9901	1.3972e-09	0.28505	0.516398	0.0159722	0.182579
79.1929	1.39725e-09	0.285019	0.516451	0.0159713	0.182559
79.3962	1.3973e-09	0.284987	0.516503	0.0159703	0.182539
79.6	1.39782e-09	0.285308	0.516034	0.0159672	0.182691
79.8043	1.39788e-09	0.285274	0.516083	0.0159741	0.182669
80.0091	1.39793e-09	0.285241	0.516134	0.0159775	0.182648
80.2145	1.39799e-09	0.285208	0.516185	0.015979	0.182627
80.4204	1.39804e-09	0.285176	0.516238	0.0159793	0.182607
80.6268	1.39809e-09	0.285144	0.516291	0.0159789	0.182587
80.8338	1.39814e-09	0.285112	0.516344	0.0159782	0.182566
81.0413	1.3982e-09	0.285079	0.516397	0.0159773	0.182546
81.2493	1.39825e-09	0.285047	0.516451	0.0159762	0.182526
81.4579	1.39877e-09	0.28536	0.515985	0.015991	0.182664
81.6669	1.39883e-09	0.285322	0.51603	0.0160078	0.18264
81.8766	1.39889e-09	0.285287	0.516079	0.0160168	0.182618
82.0867	1.39895e-09	0.285253	0.51613	0.0160214	0.182596
82.2974	1.399e-09	0.285219	0.516183	0.0160235	0.182575
82.5087	1.39906e-09	0.285186	0.516236	0.0160241	0.182554
82.7205	1.39911e-09	0.285153	0.51629	0.0160239	0.182533
82.9328	1.39916e-09	0.28512	0.516345	0.0160233	0.182512
83.1457	1.39922e-09	0.285087	0.5164	0.0160223	0.182491
83.3591	1.39976e-09	0.285407	0.515919	0.0160193	0.182655
83.5731	1.39982e-09	0.285372	0.51597	0.0160263	0.182632
83.7876	1.39987e-09	0.285337	0.516023	0.0160296	0.18261
84.0027	1.39993e-09	0.285303	0.516077	0.0160309	0.182589
84.2183	1.39998e-09	0.285269	0.516132	0.0160311	0.182568
84.4345	1.40004e-09	0.285236	0.516187	0.0160307	0.182546
84.6512	1.40009e-09	0.285202	0.516243	0.0160298	0.182525
84.8685	1.40015e-09	0.285168	0.516299	0.0160288	0.182504
85.0863	1.4002e-09	0.285135	0.516355	0.0160277	0.182483
85.3047	1.40075e-09	0.285467	0.515868	0.0160254	0.18264
85.5237	1.40081e-09	0.28543	0.51592	0.0160329	0.182617
85.7432	1.40087e-09	0.285395	0.515974	0.0160364	0.182594
85.9633	1.40092e-09	0.28536	0.516029	0.0160378	0.182572
86.184	1.40098e-09	0.285326	0.516086	0.016038	0.182551
86.4052	1.40104e-09	0.285291	0.516142	0.0160375	0.182529
86.627	1.40109e-09	0.285257	0.516199	0.0160366	0.182507
86.8493	1.40115e-09	0.285223	0.516256	0.0160356	0.182485
87.0722	1.4012e-09	0.285188	0.516314	0.0160344	0.182464
87.2957	1.40176e-09	0.285525	0.515819	0.0160333	0.182623
87.5198	1.40182e-09	0.285487	0.515871	0.0160414	0.1826
87.7445	1.40188e-09	0.285451	0.515927	0.0160452	0.182577
87.9697	1.40194e-09	0.285415	0.515983	0.0160467	0.182555
88.1955	1.402e-09	0.28538	0.516041	0.0160469	0.182532
88.4219	1.40206e-09	0.285345	0.516098	0.0160464	0.18251
88.6489	1.40211e-09	0.28531	0.516157	0.0160456	0.182488
88.8764	1.40217e-09	0.285275	0.516215	0.0160445	0.182466
89.1045	1.40223e-09	0.285239	0.516274	0.0160432	0.182443
89.3333	1.4028e-09	0.285584	0.515764	0.0160437	0.182609
89.5626	1.40287e-09	0.285546	0.515817	0.0160528	0.182584
89.7924	1.40293e-09	0.285508	0.515874	0.016057	0.182561
90.0229	1.40299e-09	0.285472	0.515931	0.0160587	0.182538
90.254	1.40304e-09	0.285436	0.51599	0.016059	0.182515
90.4857	1.4031e-09	0.2854	0.516049	0.0160585	0.182492
90.7179	1.40316e-09	0.285364	0.516109	0.0160576	0.18247
90.9508	1.40322e-09	0.285328	0.516169	0.0160565	0.182447
91.1843	1.40328e-09	0.285292	0.516229	0.0160552	0.182424
91.4183	1.40387e-09	0.285649	0.515704	0.0160578	0.18259
91.653	1.40393e-09	0.285609	0.515758	0.0160681	0.182565
91.8882	1.404e-09	0.285571	0.515816	0.0160729	0.182541
92.1241	1.40406e-09	0.285534	0.515874	0.0160748	0.182517
92.3606	1.40412e-09	0.285497	0.515934	0.0160752	0.182494
92.5976	1.40418e-09	0.28546	0.515995	0.0160747	0.182471
92.8353	1.40424e-09	0.285423	0.516056	0.0160738	0.182447
93.0736	1.4043e-09	0.285386	0.516117	0.0160727	0.182424
93.3125	1.40436e-09	0.28535	0.516178	0.0160714	0.182401
93.552	1.40496e-09	0.285712	0.515642	0.0160768	0.18257
93.7922	1.40503e-09	0.285671	0.515696	0.0160886	0.182544
94.0329	1.40509e-09	0.285632	0.515755	0.0160941	0.18252
94.2743	1.40516e-09	0.285594	0.515815	0.0160963	0.182495
94.5163	1.40522e-09	0.285556	0.515876	0.0160968	0.182472
94.7589	1.40528e-09	0.285518	0.515938	0.0160964	0.182448
95.0021	1.40534e-09	0.285481	0.516	0.0160954	0.182424
95.246	1.4054e-09	0.285443	0.516062	0.0160943	0.1824
95.4904	1.40547e-09	0.285405	0.516125	0.016093	0.182377
95.7356	1.40608e-09	0.285771	0.51558	0.0161019	0.182547
95.9813	1.40615e-09	0.285729	0.515636	0.0161155	0.18252
96.2277	1.40622e-09	0.285689	0.515695	0.0161219	0.182495
96.4747	1.40628e-09	0.285649	0.515756	0.0161244	0.18247
96.7223	1.40634e-09	0.285611	0.515818	0.0161251	0.182446
96.9706	1.40641e-09	0.285572	0.515882	0.0161247	0.182421
97.2195	1.40647e-09	0.285534	0.515945	0.0161238	0.182397
97.469	1.40653e-09	0.285495	0.516009	0.0161226	0.182373
97.7192	1.40659e-09	0.285457	0.516073	0.0161212	0.182349
97.97	1.40722e-09	0.285831	0.515516	0.0161146	0.182538
98.2215	1.40729e-09	0.285791	0.515577	0.0161203	0.182512
98.4736	1.40736e-09	0.285751	0.515639	0.0161225	0.182487
98.7264	1.40742e-09	0.285711	0.515703	0.0161229	0.182462
98.9798	1.40749e-09	0.285672	0.515768	0.0161224	0.182438
99.2339	1.40755e-09	0.285633	0.515833	0.0161214	0.182413
99.4886	1.40761e-09	0.285594	0.515898	0.0161201	0.182388
99.744	1.40768e-09	0.285555	0.515963	0.0161187	0.182364
100	1.40774e-09	0.285515	0.516029	0.0161173	0.182339
100.111	1.40834e-09	0.285924	0.515432	0.016107	0.182536
100.221	1.40837e-09	0.285905	0.515457	0.0161136	0.182524
100.332	1.4084e-09	0.285887	0.515483	0.0161183	0.182512
100.443	1.40843e-09	0.285869	0.515509	0.0161217	0.182501
100.554	1.40846e-09	0.285851	0.515536	0.0161241	0.18249
100.666	1.40849e-09	0.285833	0.515563	0.0161257	0.182478
100.777	1.40852e-09	0.285815	0.515591	0.0161267	0.182467
100.888	1.40855e-09	0.285798	0.515619	0.0161273	0.182456
101	1.40858e-09	0.28578	0.515647	0.0161276	0.182445
101.383	1.40893e-09	0.285907	0.515461	0.01613	0.182502
101.768	1.40903e-09	0.285847	0.515557	0.0161324	0.182464
102.154	1.40913e-09	0.285787	0.515655	0.0161318	0.182426
102.542	1.40923e-09	0.285727	0.515754	0.0161301	0.182389
102.931	1.40932e-09	0.285668	0.515853	0.016128	0.182351
103.322	1.40942e-09	0.285608	0.515953	0.0161257	0.182313
103.714	1.40952e-09	0.285548	0.516054	0.0161234	0.182275
104.107	1.40962e-09	0.285487	0.516154	0.0161211	0.182237
104.503	1.40972e-09	0.285427	0.516255	0.0161188	0.182199
104.886	1.41071e-09	0.286022	0.515371	0.0161489	0.182458
105.271	1.41082e-09	0.285956	0.515458	0.0161686	0.182417
105.657	1.41092e-09	0.285895	0.515553	0.0161741	0.182378
106.045	1.41102e-09	0.285835	0.515651	0.0161745	0.18234
106.434	1.41112e-09	0.285775	0.51575	0.0161732	0.182302
106.825	1.41122e-09	0.285715	0.515849	0.0161712	0.182265
107.217	1.41132e-09	0.285655	0.515949	0.016169	0.182227
107.61	1.41141e-09	0.285595	0.51605	0.0161667	0.182189
108.005	1.41151e-09	0.285534	0.516151	0.0161644	0.182151
108.389	1.4125e-09	0.286116	0.515279	0.0161667	0.182439
108.774	1.4126e-09	0.286053	0.515371	0.0161766	0.182399
109.16	1.4127e-09	0.285993	0.515467	0.0161786	0.182361
109.548	1.4128e-09	0.285933	0.515565	0.0161779	0.182324
109.937	1.4129e-09	0.285874	0.515664	0.0161761	0.182286
110.328	1.41299e-09	0.285814	0.515764	0.016174	0.182249
110.719	1.41309e-09	0.285754	0.515864	0.0161717	0.182211
111.113	1.41319e-09	0.285694	0.515964	0.0161694	0.182173
111.508	1.41329e-09	0.285633	0.516064	0.0161671	0.182135
111.891	1.41428e-09	0.286217	0.515185	0.016193	0.182405
112.277	1.41439e-09	0.286152	0.515273	0.0162114	0.182364
112.663	1.41449e-09	0.28609	0.515367	0.0162164	0.182326
113.051	1.41459e-09	0.28603	0.515465	0.0162167	0.182288
113.44	1.41469e-09	0.285971	0.515563	0.0162153	0.18225
113.83	1.41478e-09	0.285911	0.515663	0.0162134	0.182213
114.222	1.41488e-09	0.285851	0.515762	0.0162112	0.182175
114.615	1.41498e-09	0.285791	0.515862	0.0162089	0.182137
115.01	1.41508e-09	0.285731	0.515963	0.0162066	0.1821
115.394	1.41608e-09	0.286318	0.515075	0.0162302	0.182377
115.779	1.41619e-09	0.286254	0.515162	0.016248	0.182336
116.166	1.41629e-09	0.286192	0.515257	0.0162529	0.182298
116.554	1.41639e-09	0.286133	0.515354	0.0162532	0.18226
116.943	1.41649e-09	0.286073	0.515453	0.0162518	0.182223
117.333	1.41658e-09	0.286013	0.515552	0.0162498	0.182185
117.725	1.41668e-09	0.285954	0.515651	0.0162476	0.182148
118.118	1.41678e-09	0.285894	0.515751	0.0162453	0.18211
118.513	1.41688e-09	0.285834	0.515851	0.016243	0.182072
118.897	1.41787e-09	0.286418	0.51498	0.0162401	0.182362
119.282	1.41797e-09	0.286356	0.515073	0.0162484	0.182323
119.669	1.41807e-09	0.286296	0.515169	0.0162499	0.182285
120.057	1.41817e-09	0.286237	0.515267	0.0162489	0.182248
120.446	1.41826e-09	0.286177	0.515365	0.0162471	0.18221
120.836	1.41836e-09	0.286118	0.515464	0.016245	0.182173
121.228	1.41846e-09	0.286058	0.515564	0.0162427	0.182135
121.621	1.41856e-09	0.285998	0.515663	0.0162404	0.182098
122.015	1.41866e-09	0.285938	0.515763	0.0162381	0.18206
122.399	1.41965e-09	0.286524	0.514891	0.0162591	0.182325
122.785	1.41975e-09	0.28646	0.514979	0.0162759	0.182285
123.172	1.41985e-09	0.286399	0.515074	0.0162805	0.182247
123.559	1.41995e-09	0.286339	0.515171	0.0162806	0.182209
123.949	1.42005e-09	0.28628	0.515269	0.0162792	0.182172
124.339	1.42015e-09	0.28622	0.515368	0.0162772	0.182135
124.731	1.42025e-09	0.286161	0.515467	0.016275	0.182097
125.123	1.42034e-09	0.286101	0.515567	0.0162727	0.18206
125.518	1.42044e-09	0.286041	0.515666	0.0162704	0.182022
125.902	1.42144e-09	0.286629	0.514783	0.0162897	0.182299
126.288	1.42155e-09	0.286564	0.514871	0.0163061	0.182258
126.674	1.42165e-09	0.286504	0.514965	0.0163105	0.18222
127.062	1.42175e-09	0.286444	0.515062	0.0163106	0.182183
127.451	1.42185e-09	0.286385	0.515161	0.0163092	0.182146
127.842	1.42194e-09	0.286325	0.515259	0.0163072	0.182108
128.233	1.42204e-09	0.286266	0.515358	0.016305	0.182071
128.626	1.42214e-09	0.286206	0.515457	0.0163027	0.182034
129.02	1.42224e-09	0.286147	0.515557	0.0163004	0.181996
129.405	1.42323e-09	0.286723	0.514685	0.016319	0.182273
129.79	1.42334e-09	0.286659	0.514773	0.0163351	0.182233
130.177	1.42344e-09	0.286598	0.514867	0.0163395	0.182195
130.565	1.42353e-09	0.286539	0.514964	0.0163395	0.182158
130.954	1.42363e-09	0.286479	0.515062	0.0163381	0.18212
131.345	1.42373e-09	0.28642	0.515161	0.0163361	0.182083
131.736	1.42383e-09	0.286361	0.515259	0.0163339	0.182046
132.129	1.42393e-09	0.286301	0.515359	0.0163316	0.182009
132.523	1.42403e-09	0.286242	0.515458	0.0163293	0.181971
132.907	1.42502e-09	0.286823	0.514586	0.0163468	0.182244
133.293	1.42512e-09	0.286759	0.514674	0.0163626	0.182204
133.68	1.42522e-09	0.286699	0.514768	0.0163668	0.182166
134.068	1.42532e-09	0.286639	0.514865	0.0163669	0.182129
134.457	1.42542e-09	0.28658	0.514962	0.0163655	0.182092
134.847	1.42552e-09	0.286521	0.515061	0.0163635	0.182055
135.239	1.42562e-09	0.286462	0.515159	0.0163613	0.182018
135.631	1.42571e-09	0.286402	0.515258	0.016359	0.18198
136.025	1.42581e-09	0.286343	0.515358	0.0163567	0.181943
136.41	1.42681e-09	0.286925	0.514484	0.0163735	0.182217
136.796	1.42691e-09	0.286862	0.514572	0.0163891	0.182177
137.183	1.42701e-09	0.286801	0.514666	0.0163933	0.182139
137.571	1.42711e-09	0.286742	0.514763	0.0163934	0.182102
137.96	1.42721e-09	0.286683	0.51486	0.016392	0.182065
138.35	1.42731e-09	0.286624	0.514958	0.01639	0.182028
138.741	1.4274e-09	0.286564	0.515057	0.0163878	0.181991
139.134	1.4275e-09	0.286505	0.515156	0.0163855	0.181954
139.528	1.4276e-09	0.286446	0.515255	0.0163832	0.181916
139.912	1.42859e-09	0.287019	0.514391	0.0163995	0.18219
140.298	1.42869e-09	0.286956	0.514479	0.016415	0.182151
140.685	1.42879e-09	0.286895	0.514573	0.0164191	0.182113
141.073	1.42889e-09	0.286836	0.514669	0.0164192	0.182076
141.463	1.42899e-09	0.286777	0.514767	0.0164177	0.182039
141.853	1.42909e-09	0.286718	0.514865	0.0164157	0.182002
142.244	1.42918e-09	0.286659	0.514963	0.0164135	0.181965
142.637	1.42928e-09	0.286599	0.515062	0.0164113	0.181927
143.03	1.42938e-09	0.28654	0.515161	0.016409	0.18189
143.415	1.43038e-09	0.287121	0.514291	0.0164248	0.182163
143.801	1.43048e-09	0.287058	0.514378	0.0164402	0.182123
144.188	1.43058e-09	0.286998	0.514472	0.0164444	0.182086
144.576	1.43068e-09	0.286938	0.514569	0.0164445	0.182049
144.965	1.43078e-09	0.286879	0.514666	0.016443	0.182012
145.356	1.43087e-09	0.286821	0.514764	0.016441	0.181975
145.747	1.43097e-09	0.286761	0.514862	0.0164388	0.181938
146.139	1.43107e-09	0.286702	0.51496	0.0164366	0.181901
146.533	1.43117e-09	0.286643	0.515059	0.0164342	0.181864
146.918	1.43216e-09	0.287217	0.514195	0.01645	0.182138
147.304	1.43226e-09	0.287154	0.514283	0.0164654	0.182098
147.691	1.43236e-09	0.287094	0.514377	0.0164696	0.18206
148.079	1.43246e-09	0.287034	0.514473	0.0164697	0.182023
148.468	1.43256e-09	0.286976	0.51457	0.0164682	0.181986
148.858	1.43266e-09	0.286917	0.514668	0.0164662	0.181949
149.25	1.43275e-09	0.286858	0.514766	0.016464	0.181913
149.642	1.43285e-09	0.286799	0.514864	0.0164618	0.181876
150.035	1.43295e-09	0.28674	0.514962	0.0164595	0.181838
150.42	1.43394e-09	0.28732	0.514096	0.0164749	0.182109
150.806	1.43405e-09	0.287257	0.514183	0.0164903	0.18207
151.194	1.43415e-09	0.287197	0.514277	0.0164945	0.182032
151.582	1.43425e-09	0.287137	0.514373	0.0164946	0.181995
151.971	1.43434e-09	0.287079	0.51447	0.0164932	0.181958
152.361	1.43444e-09	0.28702	0.514568	0.0164912	0.181921
152.752	1.43454e-09	0.286961	0.514666	0.016489	0.181884
153.144	1.43464e-09	0.286902	0.514764	0.0164867	0.181848
153.538	1.43474e-09	0.286843	0.514862	0.0164844	0.181811
153.923	1.43572e-09	0.287414	0.514003	0.0165001	0.182083
154.309	1.43583e-09	0.28735	0.514091	0.0165155	0.182043
154.696	1.43593e-09	0.28729	0.514184	0.0165198	0.182006
155.084	1.43603e-09	0.287231	0.51428	0.0165199	0.181969
155.474	1.43612e-09	0.287172	0.514377	0.0165185	0.181932
155.864	1.43622e-09	0.287114	0.514474	0.0165165	0.181895
156.255	1.43632e-09	0.287055	0.514572	0.0165143	0.181859
156.647	1.43642e-09	0.286996	0.51467	0.016512	0.181822
157.04	1.43652e-09	0.286937	0.514768	0.0165097	0.181785
157.425	1.43751e-09	0.28751	0.513907	0.0165258	0.182057
157.812	1.43761e-09	0.287447	0.513994	0.0165415	0.182018
158.199	1.43771e-09	0.287387	0.514087	0.0165458	0.18198
158.587	1.43781e-09	0.287328	0.514183	0.016546	0.181943
158.976	1.43791e-09	0.287269	0.514279	0.0165446	0.181907
159.366	1.438e-09	0.287211	0.514377	0.0165426	0.18187
159.758	1.4381e-09	0.287152	0.514474	0.0165405	0.181833
160.15	1.4382e-09	0.287093	0.514572	0.0165382	0.181797
160.543	1.4383e-09	0.287034	0.51467	0.0165359	0.18176
160.928	1.43928e-09	0.287614	0.513815	0.0165286	0.182043
161.314	1.43938e-09	0.287553	0.513907	0.0165357	0.182005
161.702	1.43948e-09	0.287494	0.514001	0.0165369	0.181968
162.09	1.43958e-09	0.287435	0.514098	0.0165359	0.181931
162.479	1.43968e-09	0.287377	0.514194	0.0165341	0.181895
162.869	1.43977e-09	0.287318	0.514292	0.016532	0.181858
163.26	1.43987e-09	0.28726	0.514389	0.0165298	0.181821
163.652	1.43997e-09	0.287201	0.514487	0.0165275	0.181785
164.045	1.44007e-09	0.287142	0.514584	0.0165252	0.181748
164.431	1.44105e-09	0.287712	0.51374	0.0165424	0.182006
164.817	1.44115e-09	0.287649	0.513826	0.0165585	0.181966
165.204	1.44125e-09	0.287589	0.513919	0.016563	0.181929
165.593	1.44135e-09	0.28753	0.514015	0.0165632	0.181892
165.982	1.44145e-09	0.287472	0.514111	0.0165619	0.181856
166.372	1.44154e-09	0.287413	0.514208	0.0165599	0.181819
166.763	1.44164e-09	0.287355	0.514305	0.0165577	0.181783
167.155	1.44174e-09	0.287296	0.514402	0.0165555	0.181746
167.548	1.44184e-09	0.287237	0.5145	0.0165532	0.181709
167.933	1.44283e-09	0.28781	0.513637	0.0165706	0.181982
168.32	1.44294e-09	0.287747	0.513723	0.016587	0.181943
168.707	1.44304e-09	0.287687	0.513816	0.0165917	0.181905
169.095	1.44314e-09	0.287628	0.513911	0.016592	0.181868
169.484	1.44323e-09	0.28757	0.514007	0.0165907	0.181832
169.874	1.44333e-09	0.287512	0.514104	0.0165887	0.181796
170.265	1.44343e-09	0.287453	0.514201	0.0165866	0.181759
170.657	1.44353e-09	0.287395	0.514298	0.0165843	0.181723
171.05	1.44362e-09	0.287336	0.514396	0.016582	0.181686
171.436	1.44462e-09	0.287906	0.513539	0.0166005	0.181955
171.822	1.44472e-09	0.287842	0.513625	0.0166172	0.181916
172.21	1.44482e-09	0.287782	0.513717	0.0166221	0.181878
172.598	1.44492e-09	0.287724	0.513812	0.0166224	0.181842
172.987	1.44502e-09	0.287665	0.513908	0.0166211	0.181805
173.377	1.44511e-09	0.287607	0.514005	0.0166192	0.181769
173.768	1.44521e-09	0.287549	0.514102	0.016617	0.181733
174.16	1.44531e-09	0.28749	0.514199	0.0166148	0.181696
174.553	1.44541e-09	0.287432	0.514296	0.0166125	0.18166
174.938	1.4464e-09	0.288007	0.513436	0.0166318	0.181925
175.325	1.44651e-09	0.287943	0.513522	0.016649	0.181886
175.712	1.44661e-09	0.287884	0.513614	0.0166541	0.181848
176.101	1.44671e-09	0.287825	0.513709	0.0166545	0.181812
176.49	1.4468e-09	0.287767	0.513805	0.0166533	0.181776
176.88	1.4469e-09	0.287708	0.513901	0.0166513	0.181739
177.271	1.447e-09	0.28765	0.513998	0.0166492	0.181703
177.662	1.4471e-09	0.287592	0.514095	0.0166469	0.181667
178.055	1.44719e-09	0.287533	0.514192	0.0166446	0.18163
178.441	1.44817e-09	0.288098	0.513351	0.0166426	0.181909
178.828	1.44827e-09	0.288037	0.513441	0.0166516	0.181871
179.215	1.44837e-09	0.287978	0.513535	0.0166536	0.181834
179.603	1.44847e-09	0.287919	0.51363	0.0166529	0.181797
179.992	1.44857e-09	0.287861	0.513726	0.0166513	0.181761
180.382	1.44866e-09	0.287803	0.513823	0.0166492	0.181725
180.773	1.44876e-09	0.287745	0.513919	0.016647	0.181689
181.165	1.44886e-09	0.287687	0.514016	0.0166447	0.181653
181.558	1.44896e-09	0.287628	0.514113	0.0166424	0.181616
181.943	1.44994e-09	0.288198	0.513265	0.0166645	0.181873
182.33	1.45005e-09	0.288135	0.51335	0.0166827	0.181833
182.718	1.45015e-09	0.288075	0.513441	0.0166882	0.181796
183.106	1.45025e-09	0.288016	0.513536	0.0166888	0.181759
183.495	1.45034e-09	0.287958	0.513631	0.0166876	0.181723
183.885	1.45044e-09	0.2879	0.513727	0.0166857	0.181687
184.276	1.45054e-09	0.287842	0.513824	0.0166836	0.181651
184.668	1.45064e-09	0.287784	0.51392	0.0166814	0.181615
185.06	1.45073e-09	0.287725	0.514017	0.0166791	0.181578
185.446	1.45173e-09	0.288294	0.513157	0.0167022	0.181846
185.833	1.45184e-09	0.288231	0.513241	0.0167211	0.181807
186.22	1.45194e-09	0.288171	0.513333	0.0167268	0.181769
186.609	1.45204e-09	0.288112	0.513427	0.0167276	0.181733
186.998	1.45213e-09	0.288054	0.513523	0.0167264	0.181697
187.388	1.45223e-09	0.287996	0.513619	0.0167246	0.181661
187.779	1.45233e-09	0.287938	0.513715	0.0167224	0.181625
188.17	1.45243e-09	0.28788	0.513811	0.0167202	0.181588
188.563	1.45252e-09	0.287822	0.513908	0.0167179	0.181552
188.949	1.45351e-09	0.288387	0.513062	0.0167204	0.181831
189.335	1.45361e-09	0.288326	0.51315	0.0167314	0.181792
189.723	1.45371e-09	0.288267	0.513243	0.0167342	0.181756
190.111	1.45381e-09	0.288209	0.513338	0.0167338	0.181719
190.5	1.45391e-09	0.288151	0.513433	0.0167322	0.181683
190.89	1.454e-09	0.288093	0.513529	0.0167302	0.181647
191.281	1.4541e-09	0.288035	0.513625	0.016728	0.181611
191.673	1.4542e-09	0.287977	0.513722	0.0167258	0.181575
192.065	1.4543e-09	0.287919	0.513818	0.0167235	0.181539
192.451	1.45528e-09	0.288486	0.51297	0.0167501	0.181794
192.838	1.45539e-09	0.288422	0.513053	0.0167703	0.181754
193.226	1.45549e-09	0.288362	0.513144	0.0167766	0.181717
193.614	1.45559e-09	0.288304	0.513238	0.0167776	0.18168
194.003	1.45569e-09	0.288246	0.513333	0.0167766	0.181644
194.393	1.45578e-09	0.288188	0.513429	0.0167747	0.181608
194.784	1.45588e-09	0.28813	0.513525	0.0167726	0.181572
195.175	1.45598e-09	0.288072	0.513621	0.0167704	0.181536
195.568	1.45608e-09	0.288014	0.513717	0.0167681	0.1815
195.954	1.45706e-09	0.288578	0.512872	0.0167743	0.181776
196.341	1.45717e-09	0.288516	0.51296	0.0167868	0.181737
196.728	1.45727e-09	0.288457	0.513052	0.0167902	0.181701
197.117	1.45736e-09	0.288399	0.513146	0.0167901	0.181664
197.506	1.45746e-09	0.288341	0.513241	0.0167886	0.181629
197.896	1.45756e-09	0.288284	0.513337	0.0167866	0.181593
198.286	1.45766e-09	0.288226	0.513433	0.0167845	0.181557
198.678	1.45775e-09	0.288168	0.513529	0.0167822	0.181521
199.07	1.45785e-09	0.28811	0.513625	0.0167799	0.181485
199.456	1.45883e-09	0.288675	0.512786	0.0167884	0.18175
199.843	1.45894e-09	0.288613	0.512873	0.0168018	0.181712
200.231	1.45904e-09	0.288554	0.512965	0.0168055	0.181675
200.619	1.45913e-09	0.288496	0.513059	0.0168055	0.181639
201.008	1.45923e-09	0.288438	0.513154	0.0168041	0.181603
201.398	1.45933e-09	0.288381	0.51325	0.0168021	0.181567
201.789	1.45942e-09	0.288323	0.513345	0.0168	0.181532
202.18	1.45952e-09	0.288265	0.513441	0.0167977	0.181496
202.573	1.45962e-09	0.288208	0.513537	0.0167954	0.18146
202.959	1.46061e-09	0.288776	0.512692	0.0168061	0.181726
203.346	1.46071e-09	0.288714	0.512778	0.0168204	0.181688
203.733	1.46081e-09	0.288655	0.51287	0.0168245	0.181651
204.122	1.46091e-09	0.288597	0.512963	0.0168247	0.181615
204.511	1.46101e-09	0.288539	0.513058	0.0168233	0.181579
204.901	1.4611e-09	0.288482	0.513154	0.0168214	0.181543
205.292	1.4612e-09	0.288424	0.513249	0.0168192	0.181508
205.683	1.4613e-09	0.288366	0.513345	0.016817	0.181472
206.075	1.4614e-09	0.288309	0.513441	0.0168147	0.181436
206.461	1.46237e-09	0.288858	0.512617	0.0168282	0.181697
206.848	1.46247e-09	0.288796	0.512702	0.0168434	0.181658
207.236	1.46257e-09	0.288737	0.512794	0.0168479	0.181621
207.624	1.46267e-09	0.288679	0.512887	0.0168482	0.181586
208.014	1.46276e-09	0.288622	0.512982	0.0168469	0.18155
208.404	1.46286e-09	0.288564	0.513077	0.016845	0.181514
208.794	1.46296e-09	0.288507	0.513172	0.0168428	0.181478
209.185	1.46306e-09	0.288449	0.513268	0.0168406	0.181443
209.578	1.46315e-09	0.288391	0.513364	0.0168383	0.181407
209.964	1.46414e-09	0.288955	0.512521	0.0168537	0.18167
210.351	1.46425e-09	0.288893	0.512606	0.0168699	0.181631
210.739	1.46435e-09	0.288834	0.512697	0.0168748	0.181594
211.127	1.46444e-09	0.288776	0.512791	0.0168753	0.181558
211.516	1.46454e-09	0.288718	0.512885	0.0168741	0.181523
211.906	1.46464e-09	0.288661	0.51298	0.0168722	0.181487
212.297	1.46474e-09	0.288603	0.513075	0.0168701	0.181452
212.688	1.46483e-09	0.288546	0.513171	0.0168678	0.181416
213.08	1.46493e-09	0.288488	0.513266	0.0168655	0.18138
213.466	1.46593e-09	0.289054	0.512417	0.0168832	0.181646
213.853	1.46603e-09	0.288991	0.512501	0.0169005	0.181607
214.241	1.46613e-09	0.288932	0.512592	0.0169058	0.18157
214.63	1.46623e-09	0.288874	0.512685	0.0169065	0.181535
215.019	1.46633e-09	0.288817	0.512779	0.0169053	0.181499
215.409	1.46642e-09	0.288759	0.512874	0.0169035	0.181463
215.799	1.46652e-09	0.288702	0.512969	0.0169014	0.181428
216.191	1.46662e-09	0.288644	0.513064	0.0168991	0.181392
216.583	1.46671e-09	0.288587	0.51316	0.0168969	0.181356
216.969	1.46771e-09	0.289148	0.512317	0.0169176	0.181617
217.356	1.46781e-09	0.289085	0.512401	0.0169361	0.181578
217.744	1.46791e-09	0.289025	0.512491	0.0169419	0.181541
218.132	1.46801e-09	0.288968	0.512584	0.0169428	0.181506
218.521	1.46811e-09	0.28891	0.512678	0.0169417	0.18147
218.911	1.4682e-09	0.288853	0.512773	0.0169399	0.181434
219.302	1.4683e-09	0.288796	0.512868	0.0169378	0.181399
219.693	1.4684e-09	0.288738	0.512963	0.0169356	0.181363
220.085	1.46849e-09	0.288681	0.513058	0.0169333	0.181328
220.472	1.46948e-09	0.289241	0.512223	0.0169357	0.1816
220.859	1.46958e-09	0.289181	0.51231	0.016947	0.181562
221.246	1.46968e-09	0.289122	0.512402	0.0169501	0.181526
221.635	1.46978e-09	0.289065	0.512495	0.0169499	0.18149
222.024	1.46987e-09	0.289008	0.512589	0.0169484	0.181455
222.414	1.46997e-09	0.28895	0.512684	0.0169464	0.181419
222.804	1.47007e-09	0.288893	0.512779	0.0169442	0.181384
223.196	1.47017e-09	0.288836	0.512874	0.016942	0.181348
223.588	1.47026e-09	0.288779	0.512969	0.0169397	0.181313
223.974	1.47124e-09	0.289332	0.512148	0.0169455	0.181575
224.361	1.47134e-09	0.289271	0.512234	0.0169581	0.181537
224.749	1.47144e-09	0.289212	0.512325	0.0169616	0.181501
225.138	1.47153e-09	0.289155	0.512419	0.0169616	0.181465
225.527	1.47163e-09	0.289098	0.512512	0.0169602	0.18143
225.917	1.47173e-09	0.289041	0.512607	0.0169582	0.181394
226.307	1.47182e-09	0.288983	0.512702	0.0169561	0.181359
226.698	1.47192e-09	0.288926	0.512796	0.0169538	0.181324
227.09	1.47202e-09	0.288869	0.512891	0.0169515	0.181288
227.477	1.47301e-09	0.289432	0.512049	0.016981	0.181538
227.864	1.47312e-09	0.289368	0.51213	0.0170031	0.181499
228.252	1.47322e-09	0.289308	0.512219	0.0170104	0.181462
228.64	1.47332e-09	0.28925	0.512311	0.0170118	0.181426
229.029	1.47342e-09	0.289193	0.512405	0.017011	0.181391
229.419	1.47351e-09	0.289136	0.512499	0.0170093	0.181356
229.81	1.47361e-09	0.289079	0.512593	0.0170072	0.18132
230.201	1.47371e-09	0.289022	0.512688	0.017005	0.181285
230.593	1.4738e-09	0.288965	0.512783	0.0170028	0.18125
230.979	1.47492e-09	0.289677	0.511816	0.0170335	0.181473
231.366	1.47503e-09	0.289613	0.511896	0.0170578	0.181433
231.754	1.47513e-09	0.289553	0.511985	0.017066	0.181396
232.143	1.47523e-09	0.289495	0.512077	0.0170679	0.18136
232.532	1.47532e-09	0.289438	0.51217	0.0170672	0.181325
232.922	1.47542e-09	0.289381	0.512264	0.0170655	0.18129
233.312	1.47552e-09	0.289324	0.512358	0.0170635	0.181254
233.703	1.47561e-09	0.289267	0.512453	0.0170613	0.181219
234.095	1.47571e-09	0.28921	0.512548	0.017059	0.181184
234.482	1.47671e-09	0.289765	0.511707	0.0170763	0.181451
234.869	1.47681e-09	0.289703	0.511791	0.0170938	0.181413
235.257	1.47691e-09	0.289644	0.51188	0.0170994	0.181376
235.645	1.47701e-09	0.289586	0.511973	0.0171002	0.181341
236.035	1.47711e-09	0.289529	0.512066	0.0170992	0.181305
236.424	1.4772e-09	0.289472	0.51216	0.0170974	0.18127
236.815	1.4773e-09	0.289416	0.512254	0.0170953	0.181235
237.206	1.4774e-09	0.289359	0.512349	0.017093	0.1812
237.598	1.47749e-09	0.289302	0.512443	0.0170908	0.181165
237.984	1.47847e-09	0.289854	0.51162	0.0170912	0.181436
238.372	1.47858e-09	0.289793	0.511706	0.017102	0.181398
238.759	1.47867e-09	0.289735	0.511797	0.0171049	0.181363
239.148	1.47877e-09	0.289678	0.51189	0.0171047	0.181327
239.537	1.47887e-09	0.289621	0.511983	0.0171032	0.181292
239.927	1.47896e-09	0.289564	0.512077	0.0171012	0.181257
240.317	1.47906e-09	0.289508	0.512171	0.0170991	0.181222
240.708	1.47916e-09	0.289451	0.512266	0.0170968	0.181187
241.1	1.47925e-09	0.289394	0.51236	0.0170945	0.181152
241.487	1.48024e-09	0.289953	0.511529	0.0171195	0.181399
241.874	1.48035e-09	0.28989	0.51161	0.0171401	0.18136
242.262	1.48045e-09	0.289831	0.511699	0.0171469	0.181324
242.651	1.48055e-09	0.289773	0.511791	0.0171482	0.181288
243.04	1.48064e-09	0.289716	0.511884	0.0171474	0.181253
243.429	1.48074e-09	0.289659	0.511977	0.0171457	0.181218
243.82	1.48084e-09	0.289602	0.512071	0.0171436	0.181183
244.211	1.48093e-09	0.289546	0.512165	0.0171414	0.181148
244.603	1.48103e-09	0.289489	0.51226	0.0171391	0.181112
244.989	1.48201e-09	0.290037	0.511435	0.0171473	0.181381
245.377	1.48212e-09	0.289976	0.51152	0.0171613	0.181343
245.765	1.48222e-09	0.289918	0.51161	0.0171655	0.181307
246.153	1.48231e-09	0.289861	0.511702	0.0171658	0.181272
246.542	1.48241e-09	0.289804	0.511795	0.0171646	0.181237
246.932	1.48251e-09	0.289747	0.511888	0.0171627	0.181202
247.322	1.4826e-09	0.28969	0.511982	0.0171606	0.181167
247.713	1.4827e-09	0.289634	0.512076	0.0171583	0.181132
248.105	1.4828e-09	0.289577	0.51217	0.0171561	0.181097
248.492	1.48378e-09	0.290133	0.511346	0.0171683	0.181353
248.879	1.48389e-09	0.290072	0.511429	0.0171839	0.181315
249.267	1.48399e-09	0.290014	0.511519	0.0171888	0.181279
249.656	1.48408e-09	0.289956	0.511611	0.0171894	0.181243
250.045	1.48418e-09	0.2899	0.511704	0.0171882	0.181208
250.435	1.48428e-09	0.289843	0.511797	0.0171864	0.181174
250.825	1.48437e-09	0.289786	0.511891	0.0171843	0.181139
251.216	1.48447e-09	0.28973	0.511985	0.0171821	0.181104
251.608	1.48457e-09	0.289673	0.512079	0.0171798	0.181069
251.994	1.48555e-09	0.290223	0.511254	0.0171961	0.181327
252.382	1.48566e-09	0.290161	0.511337	0.0172134	0.181288
252.77	1.48576e-09	0.290103	0.511426	0.017219	0.181252
253.158	1.48585e-09	0.290046	0.511517	0.0172198	0.181217
253.547	1.48595e-09	0.289989	0.51161	0.0172188	0.181182
253.937	1.48605e-09	0.289932	0.511703	0.017217	0.181147
254.328	1.48614e-09	0.289876	0.511797	0.0172149	0.181112
254.719	1.48624e-09	0.289819	0.511891	0.0172127	0.181078
255.11	1.48634e-09	0.289763	0.511984	0.0172105	0.181043
255.497	1.48731e-09	0.290311	0.511167	0.0172108	0.181311
255.884	1.48742e-09	0.290251	0.511253	0.0172218	0.181274
256.272	1.48752e-09	0.290194	0.511343	0.0172248	0.181239
256.661	1.48761e-09	0.290137	0.511435	0.0172247	0.181204
257.05	1.48771e-09	0.29008	0.511528	0.0172232	0.181169
257.44	1.48781e-09	0.290024	0.511621	0.0172213	0.181134
257.83	1.4879e-09	0.289967	0.511714	0.0172191	0.181099
258.221	1.488e-09	0.289911	0.511808	0.0172169	0.181064
258.613	1.48809e-09	0.289854	0.511901	0.0172146	0.18103
258.999	1.48907e-09	0.290403	0.51109	0.0172195	0.181287
259.387	1.48917e-09	0.290343	0.511175	0.0172322	0.18125
259.775	1.48927e-09	0.290285	0.511265	0.017236	0.181214
260.163	1.48937e-09	0.290228	0.511357	0.0172361	0.181179
260.553	1.48946e-09	0.290171	0.511449	0.0172348	0.181144
260.942	1.48956e-09	0.290115	0.511542	0.0172329	0.18111
261.333	1.48966e-09	0.290059	0.511636	0.0172308	0.181075
261.724	1.48975e-09	0.290002	0.511729	0.0172286	0.18104
262.115	1.48985e-09	0.289946	0.511823	0.0172263	0.181005
262.502	1.49083e-09	0.290497	0.51101	0.0172356	0.181257
262.889	1.49093e-09	0.290436	0.511094	0.0172501	0.18122
263.277	1.49103e-09	0.290378	0.511183	0.0172546	0.181184
263.666	1.49113e-09	0.290321	0.511275	0.017255	0.181149
264.055	1.49122e-09	0.290265	0.511367	0.0172539	0.181114
264.445	1.49132e-09	0.290209	0.51146	0.017252	0.18108
264.835	1.49141e-09	0.290152	0.511553	0.0172499	0.181045
265.226	1.49151e-09	0.290096	0.511646	0.0172477	0.18101
265.618	1.49161e-09	0.29004	0.511739	0.0172454	0.180975
266.005	1.49259e-09	0.290589	0.510919	0.0172591	0.181233
266.392	1.4927e-09	0.290527	0.511002	0.0172755	0.181195
266.78	1.4928e-09	0.290469	0.511091	0.0172808	0.181159
267.169	1.49289e-09	0.290412	0.511182	0.0172816	0.181124
267.558	1.49299e-09	0.290356	0.511274	0.0172806	0.181089
267.948	1.49309e-09	0.2903	0.511367	0.0172788	0.181055
268.338	1.49318e-09	0.290244	0.51146	0.0172767	0.18102
268.729	1.49328e-09	0.290187	0.511553	0.0172745	0.180986
269.12	1.49338e-09	0.290131	0.511646	0.0172723	0.180951
269.507	1.49436e-09	0.290678	0.510825	0.0172906	0.181206
269.895	1.49447e-09	0.290616	0.510907	0.017309	0.181168
270.283	1.49457e-09	0.290558	0.510995	0.0173152	0.181132
270.671	1.49466e-09	0.290501	0.511086	0.0173163	0.181097
271.06	1.49476e-09	0.290445	0.511178	0.0173154	0.181062
271.45	1.49486e-09	0.290388	0.51127	0.0173137	0.181028
271.84	1.49495e-09	0.290332	0.511363	0.0173116	0.180993
272.231	1.49505e-09	0.290276	0.511456	0.0173094	0.180959
272.623	1.49515e-09	0.29022	0.511549	0.0173072	0.180924
273.01	1.49613e-09	0.290766	0.510734	0.0173108	0.181189
273.397	1.49623e-09	0.290706	0.510819	0.0173233	0.181152
273.785	1.49633e-09	0.290648	0.510908	0.017327	0.181117
274.174	1.49643e-09	0.290592	0.510999	0.0173272	0.181082
274.563	1.49652e-09	0.290536	0.511091	0.0173259	0.181047
274.953	1.49662e-09	0.290479	0.511184	0.017324	0.181013
275.343	1.49672e-09	0.290423	0.511276	0.0173219	0.180978
275.734	1.49681e-09	0.290367	0.511369	0.0173197	0.180944
276.125	1.49691e-09	0.290311	0.511462	0.0173174	0.180909
276.512	1.4979e-09	0.290859	0.510642	0.0173455	0.181154
276.9	1.498e-09	0.290796	0.510721	0.017368	0.181116
277.288	1.4981e-09	0.290737	0.510808	0.0173758	0.181079
277.676	1.4982e-09	0.29068	0.510898	0.0173777	0.181044
278.066	1.4983e-09	0.290624	0.510989	0.0173771	0.18101
278.455	1.4984e-09	0.290568	0.511082	0.0173755	0.180975
278.845	1.49849e-09	0.290512	0.511174	0.0173735	0.180941
279.236	1.49859e-09	0.290455	0.511267	0.0173713	0.180906
279.628	1.49868e-09	0.290399	0.51136	0.0173691	0.180872
280.015	1.49968e-09	0.290948	0.510537	0.0173826	0.181132
280.402	1.49978e-09	0.290887	0.510619	0.0173993	0.181095
280.79	1.49988e-09	0.290829	0.510707	0.0174049	0.181059
281.179	1.49998e-09	0.290772	0.510798	0.0174058	0.181024
281.568	1.50007e-09	0.290716	0.510889	0.0174048	0.18099
281.958	1.50017e-09	0.29066	0.510982	0.0174031	0.180955
282.348	1.50027e-09	0.290604	0.511074	0.017401	0.180921
282.739	1.50036e-09	0.290548	0.511166	0.0173988	0.180887
283.13	1.50046e-09	0.290492	0.511259	0.0173965	0.180852
283.517	1.50144e-09	0.291037	0.510451	0.0173962	0.181116
283.905	1.50154e-09	0.290977	0.510536	0.0174072	0.181079
284.293	1.50164e-09	0.29092	0.510626	0.0174104	0.181044
284.681	1.50173e-09	0.290864	0.510716	0.0174103	0.181009
285.071	1.50183e-09	0.290808	0.510808	0.017409	0.180975
285.46	1.50192e-09	0.290752	0.5109	0.0174071	0.180941
285.851	1.50202e-09	0.290696	0.510992	0.0174049	0.180906
286.241	1.50212e-09	0.29064	0.511085	0.0174027	0.180872
286.633	1.50221e-09	0.290584	0.511177	0.0174004	0.180838
287.02	1.50319e-09	0.291129	0.510375	0.0174055	0.181091
287.407	1.50329e-09	0.291069	0.510459	0.0174185	0.181054
287.795	1.50339e-09	0.291012	0.510547	0.0174226	0.181019
288.184	1.50348e-09	0.290955	0.510638	0.0174229	0.180984
288.573	1.50358e-09	0.290899	0.510729	0.0174217	0.18095
288.963	1.50368e-09	0.290844	0.510821	0.0174199	0.180916
289.353	1.50377e-09	0.290788	0.510913	0.0174178	0.180881
289.744	1.50387e-09	0.290732	0.511006	0.0174156	0.180847
290.135	1.50397e-09	0.290676	0.511098	0.0174133	0.180813
290.522	1.50493e-09	0.291209	0.510302	0.017424	0.181064
290.91	1.50504e-09	0.291149	0.510385	0.0174394	0.181027
291.298	1.50514e-09	0.291091	0.510473	0.0174444	0.180992
291.687	1.50523e-09	0.291035	0.510563	0.0174451	0.180957
292.076	1.50533e-09	0.290979	0.510654	0.0174441	0.180923
292.465	1.50543e-09	0.290923	0.510746	0.0174423	0.180889
292.856	1.50552e-09	0.290867	0.510838	0.0174402	0.180855
293.246	1.50562e-09	0.290811	0.51093	0.017438	0.18082
293.638	1.50571e-09	0.290756	0.511022	0.0174358	0.180786
294.025	1.5067e-09	0.291301	0.510208	0.0174514	0.181039
294.412	1.50681e-09	0.29124	0.510289	0.0174691	0.181001
294.801	1.50691e-09	0.291182	0.510377	0.0174751	0.180966
295.189	1.507e-09	0.291126	0.510466	0.0174763	0.180931
295.578	1.5071e-09	0.29107	0.510557	0.0174754	0.180897
295.968	1.5072e-09	0.291014	0.510649	0.0174737	0.180863
296.358	1.50729e-09	0.290959	0.510741	0.0174717	0.180829
296.749	1.50739e-09	0.290903	0.510833	0.0174695	0.180795
297.14	1.50748e-09	0.290847	0.510925	0.0174672	0.18076
297.527	1.50847e-09	0.291391	0.510109	0.0174885	0.181012
297.915	1.50858e-09	0.291329	0.510189	0.0175086	0.180974
298.303	1.50868e-09	0.291271	0.510275	0.0175157	0.180938
298.692	1.50878e-09	0.291215	0.510365	0.0175173	0.180903
299.081	1.50887e-09	0.291159	0.510455	0.0175166	0.180869
299.471	1.50897e-09	0.291103	0.510547	0.017515	0.180835
299.861	1.50907e-09	0.291047	0.510639	0.017513	0.180801
300.251	1.50916e-09	0.290992	0.51073	0.0175108	0.180767
300.643	1.50926e-09	0.290936	0.510822	0.0175086	0.180733
301.03	1.51024e-09	0.291476	0.510015	0.0175168	0.180992
301.417	1.51034e-09	0.291416	0.510098	0.0175315	0.180955
301.806	1.51044e-09	0.291358	0.510185	0.0175363	0.18092
302.194	1.51054e-09	0.291302	0.510275	0.017537	0.180886
302.583	1.51064e-09	0.291247	0.510366	0.0175359	0.180851
302.973	1.51073e-09	0.291191	0.510457	0.0175341	0.180817
303.363	1.51083e-09	0.291135	0.510549	0.0175321	0.180783
303.754	1.51092e-09	0.29108	0.510641	0.0175299	0.180749
304.145	1.51102e-09	0.291024	0.510733	0.0175276	0.180715
304.532	1.512e-09	0.291565	0.509927	0.0175418	0.180965
304.92	1.51211e-09	0.291504	0.510008	0.017559	0.180928
305.308	1.5122e-09	0.291447	0.510095	0.0175649	0.180893
305.697	1.5123e-09	0.291391	0.510185	0.017566	0.180858
306.086	1.5124e-09	0.291335	0.510276	0.0175652	0.180824
306.476	1.51249e-09	0.291279	0.510367	0.0175635	0.18079
306.866	1.51259e-09	0.291224	0.510458	0.0175614	0.180756
307.256	1.51269e-09	0.291169	0.51055	0.0175592	0.180722
307.648	1.51278e-09	0.291113	0.510642	0.017557	0.180688
308.035	1.51376e-09	0.291653	0.50984	0.0175586	0.180948
308.423	1.51386e-09	0.291594	0.509924	0.0175705	0.180911
308.811	1.51396e-09	0.291537	0.510012	0.0175743	0.180877
309.199	1.51406e-09	0.291481	0.510102	0.0175745	0.180842
309.589	1.51415e-09	0.291426	0.510193	0.0175732	0.180808
309.978	1.51425e-09	0.291371	0.510284	0.0175714	0.180774
310.368	1.51434e-09	0.291315	0.510375	0.0175693	0.180741
310.759	1.51444e-09	0.29126	0.510466	0.0175671	0.180707
311.15	1.51454e-09	0.291204	0.510558	0.0175648	0.180673
311.537	1.51551e-09	0.291745	0.509761	0.0175725	0.180922
311.925	1.51562e-09	0.291685	0.509843	0.0175869	0.180885
312.313	1.51571e-09	0.291628	0.50993	0.0175917	0.18085
312.702	1.51581e-09	0.291572	0.51002	0.0175924	0.180816
313.091	1.51591e-09	0.291517	0.51011	0.0175913	0.180782
313.481	1.516e-09	0.291461	0.510201	0.0175896	0.180748
313.871	1.5161e-09	0.291406	0.510292	0.0175875	0.180714
314.262	1.51619e-09	0.291351	0.510384	0.0175853	0.18068
314.653	1.51629e-09	0.291295	0.510475	0.0175831	0.180646
315.04	1.51727e-09	0.29183	0.509675	0.0175967	0.180898
315.428	1.51737e-09	0.29177	0.509756	0.0176138	0.180861
315.816	1.51747e-09	0.291712	0.509842	0.0176197	0.180826
316.205	1.51757e-09	0.291656	0.509931	0.0176208	0.180791
316.594	1.51767e-09	0.291601	0.510022	0.01762	0.180757
316.983	1.51776e-09	0.291546	0.510112	0.0176183	0.180724
317.373	1.51786e-09	0.29149	0.510203	0.0176163	0.18069
317.764	1.51795e-09	0.291435	0.510295	0.0176141	0.180656
318.155	1.51805e-09	0.29138	0.510386	0.0176119	0.180622
318.542	1.51903e-09	0.291919	0.509587	0.0176135	0.18088
318.93	1.51913e-09	0.29186	0.50967	0.0176256	0.180844
319.318	1.51923e-09	0.291803	0.509758	0.0176294	0.180809
319.707	1.51933e-09	0.291748	0.509847	0.0176297	0.180775
320.096	1.51942e-09	0.291692	0.509938	0.0176285	0.180742
320.486	1.51952e-09	0.291637	0.510028	0.0176266	0.180708
320.876	1.51961e-09	0.291582	0.510119	0.0176245	0.180674
321.267	1.51971e-09	0.291527	0.510211	0.0176223	0.18064
321.658	1.5198e-09	0.291472	0.510302	0.0176201	0.180607
322.045	1.52077e-09	0.292007	0.509513	0.0176282	0.180852
322.433	1.52088e-09	0.291948	0.509595	0.017643	0.180815
322.821	1.52098e-09	0.291891	0.509681	0.0176479	0.18078
323.21	1.52107e-09	0.291835	0.50977	0.0176487	0.180746
323.599	1.52117e-09	0.29178	0.509861	0.0176477	0.180712
323.988	1.52126e-09	0.291724	0.509951	0.017646	0.180679
324.379	1.52136e-09	0.291669	0.510042	0.0176439	0.180645
324.769	1.52146e-09	0.291614	0.510133	0.0176417	0.180611
325.16	1.52155e-09	0.291559	0.510224	0.0176395	0.180578
325.547	1.52253e-09	0.292093	0.509426	0.0176539	0.180828
325.935	1.52264e-09	0.292032	0.509506	0.0176714	0.180791
326.323	1.52274e-09	0.291975	0.509592	0.0176776	0.180756
326.712	1.52283e-09	0.291919	0.50968	0.0176789	0.180722
327.101	1.52293e-09	0.291864	0.50977	0.0176781	0.180688
327.491	1.52302e-09	0.291809	0.509861	0.0176765	0.180654
327.881	1.52312e-09	0.291754	0.509951	0.0176745	0.180621
328.272	1.52322e-09	0.291699	0.510042	0.0176723	0.180587
328.663	1.52331e-09	0.291644	0.510133	0.0176701	0.180553
329.05	1.5243e-09	0.29218	0.509329	0.0176908	0.1808
329.438	1.52441e-09	0.292119	0.509408	0.0177111	0.180762
329.826	1.52451e-09	0.292061	0.509493	0.0177185	0.180727
330.215	1.5246e-09	0.292006	0.509581	0.0177203	0.180693
330.604	1.5247e-09	0.29195	0.509671	0.0177198	0.180659
330.994	1.52479e-09	0.291895	0.509761	0.0177183	0.180625
331.384	1.52489e-09	0.29184	0.509852	0.0177163	0.180592
331.774	1.52498e-09	0.291785	0.509942	0.0177141	0.180558
332.165	1.52508e-09	0.29173	0.510033	0.0177119	0.180525
332.553	1.52606e-09	0.292265	0.509235	0.0177214	0.180779
332.94	1.52617e-09	0.292205	0.509316	0.0177371	0.180742
333.329	1.52627e-09	0.292148	0.509402	0.0177425	0.180707
333.717	1.52636e-09	0.292093	0.50949	0.0177435	0.180673
334.106	1.52646e-09	0.292038	0.50958	0.0177426	0.18064
334.496	1.52655e-09	0.291983	0.50967	0.0177409	0.180606
334.886	1.52665e-09	0.291928	0.509761	0.0177389	0.180573
335.277	1.52675e-09	0.291873	0.509851	0.0177367	0.180539
335.668	1.52684e-09	0.291818	0.509942	0.0177345	0.180506
336.055	1.52781e-09	0.292349	0.509155	0.0177331	0.180763
336.443	1.52792e-09	0.29229	0.509238	0.0177441	0.180728
336.831	1.52801e-09	0.292234	0.509325	0.0177475	0.180693
337.22	1.52811e-09	0.292179	0.509414	0.0177477	0.18066
337.609	1.5282e-09	0.292124	0.509504	0.0177464	0.180626
337.999	1.5283e-09	0.292069	0.509594	0.0177446	0.180593
338.389	1.5284e-09	0.292014	0.509684	0.0177425	0.180559
338.779	1.52849e-09	0.291959	0.509775	0.0177403	0.180526
339.17	1.52859e-09	0.291904	0.509865	0.0177381	0.180492
339.558	1.52957e-09	0.292441	0.50907	0.0177611	0.180728
339.945	1.52968e-09	0.29238	0.509147	0.0177826	0.180691
340.334	1.52978e-09	0.292322	0.509232	0.0177905	0.180655
340.722	1.52987e-09	0.292266	0.50932	0.0177926	0.180621
341.112	1.52997e-09	0.292211	0.509409	0.0177922	0.180588
341.501	1.53006e-09	0.292156	0.509498	0.0177907	0.180554
341.891	1.53016e-09	0.292102	0.509589	0.0177888	0.180521
342.282	1.53025e-09	0.292047	0.509679	0.0177866	0.180488
342.673	1.53035e-09	0.291992	0.509769	0.0177844	0.180454
343.06	1.53133e-09	0.292525	0.50898	0.017779	0.180716
343.448	1.53143e-09	0.292468	0.509064	0.0177884	0.18068
343.836	1.53153e-09	0.292412	0.509151	0.0177912	0.180646
344.225	1.53162e-09	0.292357	0.50924	0.017791	0.180613
344.614	1.53172e-09	0.292302	0.509329	0.0177897	0.180579
345.004	1.53181e-09	0.292247	0.509419	0.0177878	0.180546
345.394	1.53191e-09	0.292193	0.509509	0.0177857	0.180513
345.784	1.532e-09	0.292138	0.509599	0.0177835	0.180479
346.175	1.5321e-09	0.292083	0.509689	0.0177813	0.180446
346.563	1.53308e-09	0.292614	0.508901	0.0178008	0.180684
346.95	1.53318e-09	0.292553	0.508979	0.0178208	0.180647
347.339	1.53328e-09	0.292496	0.509064	0.0178281	0.180612
347.727	1.53338e-09	0.292441	0.509151	0.01783	0.180578
348.117	1.53347e-09	0.292386	0.50924	0.0178295	0.180545
348.506	1.53357e-09	0.292331	0.50933	0.017828	0.180511
348.896	1.53366e-09	0.292276	0.50942	0.017826	0.180478
349.287	1.53376e-09	0.292222	0.50951	0.0178239	0.180445
349.678	1.53386e-09	0.292167	0.5096	0.0178217	0.180412
350.065	1.53483e-09	0.292692	0.508812	0.0178307	0.180665
350.453	1.53494e-09	0.292632	0.508893	0.0178463	0.180629
350.841	1.53504e-09	0.292576	0.508978	0.0178517	0.180594
351.23	1.53513e-09	0.29252	0.509066	0.0178528	0.180561
351.619	1.53523e-09	0.292466	0.509155	0.0178519	0.180527
352.009	1.53532e-09	0.292411	0.509245	0.0178503	0.180494
352.399	1.53542e-09	0.292357	0.509334	0.0178483	0.180461
352.789	1.53551e-09	0.292302	0.509424	0.0178461	0.180428
353.18	1.53561e-09	0.292247	0.509514	0.0178439	0.180394
353.568	1.53658e-09	0.292778	0.508735	0.0178429	0.180644
353.956	1.53668e-09	0.29272	0.508817	0.0178542	0.180609
354.344	1.53678e-09	0.292664	0.508904	0.0178577	0.180575
354.733	1.53687e-09	0.292609	0.508992	0.017858	0.180541
355.122	1.53697e-09	0.292554	0.509081	0.0178568	0.180508
355.511	1.53706e-09	0.2925	0.50917	0.017855	0.180475
355.901	1.53716e-09	0.292445	0.50926	0.017853	0.180441
356.292	1.53725e-09	0.292391	0.50935	0.0178508	0.180408
356.683	1.53735e-09	0.292337	0.50944	0.0178485	0.180375
357.07	1.53834e-09	0.292868	0.508647	0.0178718	0.180613
357.458	1.53844e-09	0.292807	0.508723	0.0178937	0.180576
357.846	1.53854e-09	0.29275	0.508807	0.0179019	0.180541
358.235	1.53864e-09	0.292694	0.508894	0.0179042	0.180507
358.624	1.53874e-09	0.292639	0.508983	0.0179039	0.180474
359.014	1.53883e-09	0.292585	0.509072	0.0179024	0.180441
359.404	1.53893e-09	0.29253	0.509161	0.0179005	0.180408
359.794	1.53902e-09	0.292476	0.509251	0.0178984	0.180375
360.185	1.53912e-09	0.292422	0.509341	0.0178962	0.180342
360.573	1.54009e-09	0.292952	0.508555	0.0178925	0.180601
360.961	1.5402e-09	0.292894	0.508637	0.0179028	0.180566
361.349	1.54029e-09	0.292838	0.508724	0.017906	0.180532
361.738	1.54039e-09	0.292783	0.508812	0.0179061	0.180498
362.127	1.54048e-09	0.292729	0.508901	0.0179049	0.180465
362.516	1.54058e-09	0.292675	0.50899	0.0179031	0.180432
362.906	1.54067e-09	0.29262	0.509079	0.017901	0.180399
363.297	1.54077e-09	0.292566	0.509169	0.0178988	0.180366
363.688	1.54086e-09	0.292512	0.509259	0.0178966	0.180333
364.075	1.54184e-09	0.293038	0.508477	0.0179176	0.180567
364.463	1.54195e-09	0.292978	0.508554	0.0179385	0.18053
364.851	1.54205e-09	0.292921	0.508638	0.0179464	0.180495
365.24	1.54214e-09	0.292865	0.508725	0.0179485	0.180462
365.629	1.54224e-09	0.292811	0.508813	0.0179481	0.180428
366.019	1.54233e-09	0.292756	0.508902	0.0179467	0.180395
366.409	1.54243e-09	0.292702	0.508991	0.0179448	0.180362
366.799	1.54252e-09	0.292648	0.50908	0.0179427	0.180329
367.19	1.54262e-09	0.292593	0.50917	0.0179405	0.180296
367.578	1.5436e-09	0.293115	0.508386	0.0179519	0.180547
367.966	1.5437e-09	0.293056	0.508465	0.0179687	0.180511
368.354	1.5438e-09	0.292999	0.50855	0.0179748	0.180476
368.743	1.5439e-09	0.292944	0.508637	0.0179762	0.180443
369.132	1.54399e-09	0.29289	0.508725	0.0179756	0.18041
369.521	1.54409e-09	0.292835	0.508814	0.017974	0.180377
369.911	1.54418e-09	0.292781	0.508903	0.017972	0.180344
370.302	1.54428e-09	0.292727	0.508992	0.0179699	0.180311
370.693	1.54437e-09	0.292673	0.509082	0.0179677	0.180278
371.08	1.54535e-09	0.293203	0.5083	0.0179698	0.180527
371.468	1.54545e-09	0.293145	0.508381	0.0179827	0.180492
371.857	1.54555e-09	0.293089	0.508466	0.0179871	0.180458
372.245	1.54565e-09	0.293034	0.508553	0.0179877	0.180425
372.634	1.54574e-09	0.29298	0.508642	0.0179867	0.180392
373.024	1.54584e-09	0.292926	0.508731	0.017985	0.180359
373.414	1.54593e-09	0.292872	0.50882	0.017983	0.180326
373.804	1.54603e-09	0.292818	0.508909	0.0179808	0.180293
374.195	1.54612e-09	0.292764	0.508998	0.0179786	0.18026
374.583	1.5471e-09	0.293291	0.508217	0.0179886	0.180503
374.971	1.54721e-09	0.293232	0.508296	0.0180049	0.180467
375.359	1.5473e-09	0.293176	0.508381	0.0180108	0.180433
375.748	1.5474e-09	0.293121	0.508468	0.0180121	0.1804
376.137	1.5475e-09	0.293066	0.508556	0.0180114	0.180367
376.527	1.54759e-09	0.293012	0.508644	0.0180099	0.180334
376.917	1.54769e-09	0.292958	0.508733	0.0180079	0.180301
377.307	1.54778e-09	0.292904	0.508822	0.0180057	0.180268
377.698	1.54788e-09	0.29285	0.508911	0.0180035	0.180235
378.085	1.54885e-09	0.293374	0.508135	0.0180048	0.180486
378.473	1.54895e-09	0.293316	0.508216	0.0180173	0.180451
378.862	1.54905e-09	0.29326	0.508301	0.0180215	0.180417
379.25	1.54915e-09	0.293205	0.508388	0.0180221	0.180384
379.64	1.54924e-09	0.293151	0.508477	0.0180211	0.180351
380.029	1.54934e-09	0.293097	0.508565	0.0180194	0.180318
380.419	1.54943e-09	0.293043	0.508654	0.0180174	0.180286
380.809	1.54953e-09	0.292989	0.508743	0.0180152	0.180253
381.2	1.54962e-09	0.292935	0.508832	0.018013	0.18022
381.588	1.55059e-09	0.293455	0.508063	0.0180223	0.180459
381.976	1.55069e-09	0.293396	0.508142	0.0180383	0.180423
382.364	1.55079e-09	0.29334	0.508226	0.0180441	0.180389
382.753	1.55089e-09	0.293285	0.508313	0.0180453	0.180356
383.142	1.55098e-09	0.293231	0.508401	0.0180446	0.180323
383.532	1.55108e-09	0.293177	0.508489	0.018043	0.18029
383.922	1.55117e-09	0.293123	0.508578	0.0180411	0.180258
384.312	1.55127e-09	0.293069	0.508667	0.0180389	0.180225
384.703	1.55136e-09	0.293016	0.508755	0.0180367	0.180192
385.09	1.55234e-09	0.293539	0.507974	0.0180536	0.180433
385.478	1.55245e-09	0.293479	0.508051	0.0180731	0.180397
385.867	1.55255e-09	0.293423	0.508134	0.0180805	0.180363
386.255	1.55264e-09	0.293368	0.508221	0.0180825	0.180329
386.645	1.55274e-09	0.293313	0.508308	0.0180821	0.180296
387.034	1.55283e-09	0.293259	0.508396	0.0180807	0.180264
387.424	1.55293e-09	0.293206	0.508485	0.0180788	0.180231
387.814	1.55302e-09	0.293152	0.508573	0.0180767	0.180198
388.205	1.55312e-09	0.293098	0.508662	0.0180744	0.180166
388.593	1.5541e-09	0.293619	0.507884	0.0180831	0.180414
388.981	1.5542e-09	0.29356	0.507963	0.018099	0.180378
389.369	1.5543e-09	0.293504	0.508047	0.0181048	0.180344
389.758	1.5544e-09	0.293449	0.508133	0.0181061	0.180311
390.147	1.55449e-09	0.293395	0.508221	0.0181054	0.180278
390.537	1.55459e-09	0.293341	0.508309	0.0181039	0.180246
390.927	1.55468e-09	0.293288	0.508397	0.0181019	0.180213
391.317	1.55478e-09	0.293234	0.508486	0.0180998	0.18018
391.708	1.55487e-09	0.29318	0.508575	0.0180976	0.180148
392.095	1.55584e-09	0.293697	0.507811	0.0180981	0.180393
392.483	1.55594e-09	0.293639	0.507892	0.0181104	0.180358
392.872	1.55604e-09	0.293584	0.507977	0.0181146	0.180325
393.261	1.55613e-09	0.29353	0.508063	0.0181152	0.180292
393.65	1.55623e-09	0.293476	0.508151	0.0181142	0.180259
394.039	1.55632e-09	0.293422	0.508239	0.0181124	0.180226
394.429	1.55642e-09	0.293368	0.508327	0.0181104	0.180194
394.82	1.55651e-09	0.293315	0.508416	0.0181083	0.180161
395.21	1.55661e-09	0.293261	0.508504	0.0181061	0.180129
395.598	1.55758e-09	0.293783	0.507733	0.0181147	0.180369
395.986	1.55768e-09	0.293724	0.507812	0.0181306	0.180333
396.374	1.55778e-09	0.293669	0.507896	0.0181364	0.180299
396.763	1.55788e-09	0.293614	0.507982	0.0181378	0.180266
397.152	1.55797e-09	0.29356	0.508069	0.0181371	0.180234
397.542	1.55807e-09	0.293506	0.508157	0.0181356	0.180201
397.932	1.55816e-09	0.293453	0.508245	0.0181336	0.180169
398.322	1.55826e-09	0.293399	0.508333	0.0181315	0.180136
398.713	1.55835e-09	0.293345	0.508422	0.0181293	0.180104
399.1	1.55934e-09	0.293875	0.507638	0.0181458	0.180341
399.488	1.55944e-09	0.293815	0.507714	0.0181654	0.180305
399.877	1.55954e-09	0.293759	0.507797	0.018173	0.180271
400.266	1.55964e-09	0.293705	0.507883	0.0181751	0.180238
400.655	1.55974e-09	0.293651	0.50797	0.0181748	0.180205
401.044	1.55983e-09	0.293597	0.508057	0.0181734	0.180173
401.434	1.55993e-09	0.293543	0.508145	0.0181715	0.18014
401.825	1.56002e-09	0.29349	0.508233	0.0181694	0.180108
402.215	1.56012e-09	0.293436	0.508322	0.0181672	0.180075
402.603	1.56109e-09	0.293954	0.507548	0.0181764	0.180321
402.991	1.5612e-09	0.293895	0.507626	0.0181927	0.180286
403.379	1.5613e-09	0.29384	0.50771	0.0181988	0.180252
403.768	1.56139e-09	0.293785	0.507796	0.0182002	0.180219
404.157	1.56149e-09	0.293731	0.507883	0.0181996	0.180186
404.547	1.56158e-09	0.293678	0.50797	0.0181981	0.180154
404.937	1.56168e-09	0.293624	0.508058	0.0181961	0.180122
405.327	1.56177e-09	0.293571	0.508146	0.018194	0.180089
405.718	1.56187e-09	0.293517	0.508234	0.0181918	0.180057
406.105	1.56284e-09	0.294036	0.507468	0.0181935	0.180303
406.493	1.56294e-09	0.293978	0.507548	0.0182065	0.180268
406.882	1.56304e-09	0.293923	0.507632	0.018211	0.180234
407.271	1.56313e-09	0.293869	0.507718	0.0182118	0.180201
407.66	1.56323e-09	0.293815	0.507805	0.0182109	0.180169
408.049	1.56332e-09	0.293762	0.507893	0.0182093	0.180136
408.439	1.56342e-09	0.293708	0.50798	0.0182073	0.180104
408.83	1.56351e-09	0.293655	0.508068	0.0182052	0.180072
409.22	1.56361e-09	0.293601	0.508156	0.0182029	0.180039
409.608	1.56458e-09	0.294122	0.507387	0.0182131	0.180278
409.996	1.56469e-09	0.294063	0.507465	0.01823	0.180242
410.384	1.56478e-09	0.294007	0.507548	0.0182363	0.180209
410.773	1.56488e-09	0.293953	0.507633	0.0182379	0.180176
411.162	1.56498e-09	0.293899	0.50772	0.0182373	0.180143
411.552	1.56507e-09	0.293846	0.507807	0.0182358	0.180111
411.942	1.56517e-09	0.293793	0.507895	0.0182339	0.180079
412.332	1.56526e-09	0.293739	0.507983	0.0182318	0.180046
412.723	1.56535e-09	0.293686	0.508071	0.0182296	0.180014
413.11	1.56632e-09	0.294196	0.507311	0.0182329	0.18026
413.499	1.56642e-09	0.294138	0.50739	0.0182466	0.180225
413.887	1.56652e-09	0.294083	0.507474	0.0182515	0.180192
414.276	1.56662e-09	0.294029	0.507559	0.0182525	0.180159
414.665	1.56671e-09	0.293975	0.507646	0.0182517	0.180127
415.054	1.56681e-09	0.293922	0.507734	0.01825	0.180094
415.444	1.5669e-09	0.293869	0.507821	0.0182481	0.180062
415.835	1.567e-09	0.293815	0.507909	0.0182459	0.18003
416.225	1.56709e-09	0.293762	0.507996	0.0182437	0.179998
416.613	1.56806e-09	0.294275	0.507239	0.0182552	0.180231
417.001	1.56816e-09	0.294216	0.507316	0.0182726	0.180196
417.389	1.56826e-09	0.29416	0.507399	0.0182792	0.180162
417.778	1.56836e-09	0.294106	0.507484	0.0182809	0.180129
418.167	1.56845e-09	0.294052	0.50757	0.0182804	0.180097
418.557	1.56855e-09	0.293999	0.507657	0.018279	0.180064
418.947	1.56864e-09	0.293946	0.507745	0.0182771	0.180032
419.337	1.56873e-09	0.293893	0.507832	0.018275	0.18
419.728	1.56883e-09	0.293839	0.50792	0.0182728	0.179968
420.115	1.56981e-09	0.294358	0.507152	0.0182772	0.180213
420.504	1.56991e-09	0.2943	0.50723	0.0182915	0.180178
420.892	1.57001e-09	0.294245	0.507314	0.0182968	0.180144
421.281	1.5701e-09	0.294191	0.507399	0.018298	0.180112
421.67	1.5702e-09	0.294138	0.507486	0.0182972	0.180079
422.059	1.57029e-09	0.294084	0.507573	0.0182957	0.180047
422.449	1.57039e-09	0.294031	0.50766	0.0182937	0.180015
422.84	1.57048e-09	0.293978	0.507747	0.0182916	0.179983
423.23	1.57058e-09	0.293925	0.507835	0.0182894	0.179951
423.618	1.57155e-09	0.294442	0.507069	0.0183026	0.180187
424.006	1.57166e-09	0.294383	0.507145	0.018321	0.180151
424.395	1.57176e-09	0.294327	0.507227	0.0183281	0.180117
424.783	1.57185e-09	0.294273	0.507312	0.0183301	0.180085
425.173	1.57195e-09	0.29422	0.507398	0.0183297	0.180052
425.562	1.57204e-09	0.294166	0.507485	0.0183283	0.18002
425.952	1.57214e-09	0.294113	0.507572	0.0183264	0.179988
426.342	1.57223e-09	0.29406	0.50766	0.0183244	0.179956
426.733	1.57233e-09	0.294007	0.507747	0.0183222	0.179924
427.12	1.5733e-09	0.294522	0.506983	0.0183289	0.180166
427.509	1.5734e-09	0.294464	0.507061	0.0183444	0.180131
427.897	1.5735e-09	0.294409	0.507143	0.0183502	0.180098
428.286	1.5736e-09	0.294355	0.507229	0.0183516	0.180065
428.675	1.57369e-09	0.294301	0.507315	0.018351	0.180033
429.065	1.57379e-09	0.294248	0.507402	0.0183495	0.180001
429.454	1.57388e-09	0.294195	0.507489	0.0183475	0.179969
429.845	1.57398e-09	0.294142	0.507576	0.0183454	0.179937
430.235	1.57407e-09	0.294089	0.507663	0.0183432	0.179905
430.623	1.57504e-09	0.294605	0.506904	0.0183434	0.180148
431.011	1.57514e-09	0.294548	0.506983	0.018356	0.180114
431.4	1.57524e-09	0.294493	0.507066	0.0183605	0.18008
431.788	1.57534e-09	0.294439	0.507152	0.0183613	0.180048
432.178	1.57543e-09	0.294386	0.507238	0.0183604	0.180016
432.567	1.57553e-09	0.294333	0.507325	0.0183588	0.179984
432.957	1.57562e-09	0.29428	0.507411	0.0183568	0.179952
433.347	1.57571e-09	0.294227	0.507499	0.0183547	0.17992
433.738	1.57581e-09	0.294174	0.507586	0.0183525	0.179888
434.126	1.57677e-09	0.294681	0.506834	0.018362	0.180123
434.514	1.57688e-09	0.294623	0.506911	0.0183786	0.180087
434.902	1.57698e-09	0.294568	0.506993	0.018385	0.180054
435.291	1.57707e-09	0.294514	0.507078	0.0183867	0.180022
435.68	1.57717e-09	0.294461	0.507164	0.0183862	0.179989
436.07	1.57726e-09	0.294408	0.50725	0.0183848	0.179957
436.459	1.57736e-09	0.294355	0.507337	0.0183829	0.179925
436.85	1.57745e-09	0.294302	0.507424	0.0183808	0.179894
437.24	1.57754e-09	0.294249	0.507511	0.0183786	0.179862
437.628	1.57853e-09	0.294769	0.506743	0.0183819	0.180107
438.016	1.57863e-09	0.294711	0.506821	0.0183961	0.180072
438.405	1.57873e-09	0.294656	0.506904	0.0184014	0.180039
438.793	1.57882e-09	0.294602	0.506988	0.0184026	0.180006
439.183	1.57892e-09	0.294549	0.507074	0.0184019	0.179974
439.572	1.57901e-09	0.294496	0.507161	0.0184003	0.179942
439.962	1.57911e-09	0.294443	0.507248	0.0183984	0.179911
440.352	1.5792e-09	0.294391	0.507334	0.0183963	0.179879
440.743	1.57929e-09	0.294338	0.507421	0.0183941	0.179847
441.131	1.58027e-09	0.294856	0.506656	0.0184067	0.180082
441.519	1.58038e-09	0.294797	0.506732	0.0184251	0.180046
441.907	1.58048e-09	0.294742	0.506813	0.0184323	0.180013
442.296	1.58057e-09	0.294688	0.506898	0.0184344	0.17998
442.685	1.58067e-09	0.294634	0.506983	0.0184341	0.179948
443.075	1.58076e-09	0.294582	0.507069	0.0184327	0.179916
443.465	1.58086e-09	0.294529	0.507156	0.0184309	0.179884
443.855	1.58095e-09	0.294476	0.507243	0.0184288	0.179853
444.245	1.58105e-09	0.294423	0.507329	0.0184266	0.179821
444.633	1.58201e-09	0.294924	0.506582	0.0184336	0.18006
445.021	1.58211e-09	0.294866	0.506659	0.0184492	0.180025
445.41	1.58221e-09	0.294811	0.506741	0.0184552	0.179992
445.799	1.58231e-09	0.294758	0.506826	0.0184567	0.17996
446.188	1.5824e-09	0.294705	0.506911	0.0184561	0.179928
446.577	1.5825e-09	0.294652	0.506997	0.0184547	0.179896
446.967	1.58259e-09	0.294599	0.507084	0.0184528	0.179864
447.357	1.58268e-09	0.294546	0.50717	0.0184507	0.179832
447.748	1.58278e-09	0.294494	0.507257	0.0184485	0.179801
[truncated: 5,017 more rows]

## Sheet: cd
Time (s)	d_p (m)	H2O (wt %)	H2SO4 (wt %)	HNO3 (wt %)	NH3 (wt %)
5.99894	1.43402e-09	0.236873	0.442187	0.132603	0.188336
6.00406	1.43403e-09	0.23687	0.442183	0.132612	0.188336
6.00918	1.43404e-09	0.236866	0.442178	0.13262	0.188336
6.01431	1.43404e-09	0.236862	0.442174	0.132629	0.188335
6.01945	1.43408e-09	0.236894	0.442148	0.132632	0.188326
6.02459	1.43409e-09	0.236891	0.442144	0.132641	0.188324
6.02973	1.4341e-09	0.236887	0.442141	0.13265	0.188322
6.03488	1.4341e-09	0.236884	0.442137	0.132659	0.18832
6.04003	1.43411e-09	0.23688	0.442133	0.132669	0.188318
6.04519	1.43412e-09	0.236877	0.442129	0.132678	0.188316
6.05035	1.43412e-09	0.236873	0.442126	0.132687	0.188314
6.05551	1.43413e-09	0.23687	0.442122	0.132696	0.188312
6.06068	1.43414e-09	0.236867	0.442118	0.132705	0.18831
6.06586	1.43416e-09	0.236881	0.442104	0.132711	0.188304
6.07104	1.43416e-09	0.236875	0.442097	0.13272	0.188308
6.07622	1.43417e-09	0.23687	0.44209	0.132728	0.188311
6.08141	1.43418e-09	0.236865	0.442083	0.132737	0.188315
6.0866	1.43418e-09	0.23686	0.442076	0.132745	0.188319
6.0918	1.43419e-09	0.236855	0.44207	0.132753	0.188322
6.097	1.4342e-09	0.23685	0.442063	0.132762	0.188326
6.1022	1.4342e-09	0.236845	0.442056	0.13277	0.18833
6.10741	1.43421e-09	0.23684	0.442049	0.132778	0.188334
6.11263	1.4342e-09	0.236751	0.442091	0.1328	0.188358
6.11785	1.4342e-09	0.236747	0.442086	0.132808	0.188359
6.12307	1.43421e-09	0.236743	0.442081	0.132816	0.188359
6.1283	1.43422e-09	0.236739	0.442077	0.132824	0.18836
6.13353	1.43422e-09	0.236735	0.442072	0.132832	0.188361
6.13876	1.43423e-09	0.236731	0.442068	0.13284	0.188361
6.144	1.43424e-09	0.236728	0.442063	0.132848	0.188362
6.14925	1.43424e-09	0.236724	0.442058	0.132855	0.188363
6.1545	1.43425e-09	0.23672	0.442054	0.132863	0.188363
6.15975	1.4343e-09	0.236761	0.442023	0.132863	0.188353
6.16501	1.4343e-09	0.236757	0.442018	0.132872	0.188353
6.17028	1.43431e-09	0.236753	0.442013	0.13288	0.188354
6.17554	1.43432e-09	0.236749	0.442008	0.132888	0.188355
6.18082	1.43432e-09	0.236745	0.442004	0.132896	0.188355
6.18609	1.43433e-09	0.236741	0.441999	0.132904	0.188356
6.19138	1.43434e-09	0.236737	0.441994	0.132912	0.188357
6.19666	1.43434e-09	0.236733	0.44199	0.13292	0.188357
6.20195	1.43435e-09	0.236729	0.441985	0.132927	0.188358
6.20725	1.4344e-09	0.23677	0.441955	0.132928	0.188348
6.21255	1.43441e-09	0.236766	0.441951	0.132937	0.188346
6.21785	1.43441e-09	0.236763	0.441947	0.132946	0.188344
6.22316	1.43442e-09	0.236759	0.441944	0.132954	0.188343
6.22847	1.43442e-09	0.236756	0.44194	0.132963	0.188341
6.23379	1.43443e-09	0.236753	0.441937	0.132971	0.188339
6.23911	1.43444e-09	0.236749	0.441933	0.13298	0.188338
6.24444	1.43444e-09	0.236746	0.44193	0.132988	0.188336
6.24977	1.43445e-09	0.236743	0.441926	0.132996	0.188334
6.2551	1.43447e-09	0.23675	0.441916	0.133003	0.18833
6.26044	1.43447e-09	0.236747	0.441913	0.133012	0.188328
6.26579	1.43448e-09	0.236743	0.441909	0.133021	0.188326
6.27114	1.43449e-09	0.23674	0.441905	0.13303	0.188325
6.27649	1.43449e-09	0.236737	0.441902	0.133039	0.188323
6.28185	1.4345e-09	0.236733	0.441898	0.133047	0.188321
6.28721	1.43451e-09	0.23673	0.441895	0.133056	0.18832
6.29258	1.43451e-09	0.236726	0.441891	0.133064	0.188318
6.29795	1.43452e-09	0.236723	0.441888	0.133073	0.188316
6.30333	1.43454e-09	0.236741	0.441872	0.133078	0.188309
6.30871	1.43455e-09	0.236735	0.441864	0.133086	0.188314
6.3141	1.43456e-09	0.23673	0.441857	0.133094	0.188319
6.31949	1.43456e-09	0.236725	0.44185	0.133102	0.188324
6.32488	1.43457e-09	0.236719	0.441842	0.133109	0.188329
6.33028	1.43458e-09	0.236714	0.441835	0.133117	0.188334
6.33569	1.43458e-09	0.236708	0.441828	0.133125	0.188339
6.3411	1.43459e-09	0.236703	0.441821	0.133132	0.188344
6.34651	1.43459e-09	0.236698	0.441813	0.13314	0.188349
6.35193	1.4346e-09	0.236622	0.441847	0.133159	0.188372
6.35735	1.4346e-09	0.236618	0.441843	0.133167	0.188373
6.36278	1.43461e-09	0.236614	0.441838	0.133174	0.188373
6.36821	1.43461e-09	0.23661	0.441834	0.133182	0.188374
6.37365	1.43462e-09	0.236607	0.44183	0.133189	0.188375
6.37909	1.43463e-09	0.236603	0.441825	0.133197	0.188376
6.38454	1.43463e-09	0.236599	0.441821	0.133204	0.188376
6.38999	1.43464e-09	0.236595	0.441817	0.133211	0.188377
6.39544	1.43464e-09	0.236591	0.441812	0.133218	0.188378
6.4009	1.43469e-09	0.236633	0.441782	0.133218	0.188367
6.40637	1.4347e-09	0.236629	0.441778	0.133226	0.188367
6.41184	1.43471e-09	0.236626	0.441774	0.133234	0.188366
6.41731	1.43471e-09	0.236622	0.44177	0.133242	0.188366
6.42279	1.43472e-09	0.236619	0.441766	0.13325	0.188365
6.42827	1.43473e-09	0.236615	0.441763	0.133258	0.188365
6.43376	1.43473e-09	0.236611	0.441759	0.133265	0.188364
6.43925	1.43474e-09	0.236608	0.441755	0.133273	0.188364
6.44475	1.43474e-09	0.236605	0.441752	0.13328	0.188363
6.45025	1.43478e-09	0.236632	0.44173	0.133283	0.188355
6.45576	1.43479e-09	0.236629	0.441726	0.133291	0.188353
6.46127	1.43479e-09	0.236626	0.441723	0.1333	0.188352
6.46679	1.4348e-09	0.236622	0.44172	0.133308	0.18835
6.47231	1.4348e-09	0.236619	0.441717	0.133316	0.188348
6.47783	1.43481e-09	0.236616	0.441713	0.133324	0.188347
6.48336	1.43482e-09	0.236613	0.44171	0.133332	0.188345
6.4889	1.43482e-09	0.23661	0.441707	0.13334	0.188344
6.49444	1.43483e-09	0.236606	0.441704	0.133347	0.188342
6.49998	1.43485e-09	0.236623	0.441689	0.133352	0.188336
6.50553	1.43486e-09	0.23662	0.441685	0.133361	0.188334
6.51109	1.43486e-09	0.236617	0.441682	0.133369	0.188332
6.51665	1.43487e-09	0.236613	0.441679	0.133377	0.188331
6.52221	1.43488e-09	0.23661	0.441675	0.133386	0.188329
6.52778	1.43488e-09	0.236607	0.441672	0.133394	0.188327
6.53335	1.43489e-09	0.236603	0.441669	0.133402	0.188326
6.53893	1.43489e-09	0.2366	0.441666	0.13341	0.188324
6.54451	1.4349e-09	0.236597	0.441663	0.133418	0.188323
6.5501	1.43492e-09	0.236605	0.441652	0.133424	0.188318
6.55569	1.43493e-09	0.2366	0.441645	0.133432	0.188323
6.56129	1.43493e-09	0.236595	0.441638	0.133439	0.188329
6.56689	1.43494e-09	0.236589	0.44163	0.133446	0.188334
6.5725	1.43494e-09	0.236584	0.441623	0.133453	0.188339
6.57811	1.43495e-09	0.236578	0.441616	0.133461	0.188345
6.58372	1.43496e-09	0.236573	0.441609	0.133468	0.18835
6.58934	1.43496e-09	0.236568	0.441602	0.133475	0.188356
6.59497	1.43497e-09	0.236562	0.441595	0.133482	0.188361
6.6006	1.43498e-09	0.236498	0.441622	0.133498	0.188381
6.60624	1.43499e-09	0.236494	0.441618	0.133505	0.188382
6.61188	1.43499e-09	0.23649	0.441614	0.133513	0.188383
6.61752	1.435e-09	0.236487	0.44161	0.133519	0.188383
6.62317	1.435e-09	0.236483	0.441606	0.133526	0.188384
6.62882	1.43501e-09	0.236479	0.441603	0.133533	0.188385
6.63448	1.43501e-09	0.236476	0.441599	0.13354	0.188386
6.64015	1.43502e-09	0.236472	0.441595	0.133547	0.188386
6.64582	1.43503e-09	0.236468	0.441591	0.133554	0.188387
6.65149	1.43508e-09	0.23651	0.44156	0.133553	0.188377
6.65717	1.43508e-09	0.236507	0.441557	0.13356	0.188376
6.66285	1.43509e-09	0.236503	0.441554	0.133568	0.188376
6.66854	1.43509e-09	0.2365	0.44155	0.133575	0.188375
6.67423	1.4351e-09	0.236496	0.441547	0.133582	0.188375
6.67993	1.4351e-09	0.236493	0.441543	0.13359	0.188374
6.68564	1.43511e-09	0.236489	0.44154	0.133597	0.188374
6.69134	1.43512e-09	0.236486	0.441537	0.133604	0.188374
6.69706	1.43512e-09	0.236483	0.441533	0.133611	0.188373
6.70277	1.43515e-09	0.236501	0.441517	0.133615	0.188367
6.7085	1.43516e-09	0.236498	0.441514	0.133622	0.188366
6.71422	1.43516e-09	0.236495	0.441511	0.13363	0.188364
6.71996	1.43517e-09	0.236492	0.441508	0.133638	0.188363
6.72569	1.43518e-09	0.236489	0.441505	0.133645	0.188361
6.73143	1.43518e-09	0.236486	0.441502	0.133653	0.18836
6.73718	1.43519e-09	0.236482	0.441499	0.13366	0.188358
6.74293	1.43519e-09	0.236479	0.441496	0.133668	0.188357
6.74869	1.4352e-09	0.236476	0.441494	0.133675	0.188355
6.75445	1.43522e-09	0.236494	0.441478	0.133679	0.188348
6.76022	1.43523e-09	0.236491	0.441475	0.133687	0.188347
6.76599	1.43523e-09	0.236488	0.441472	0.133695	0.188346
6.77177	1.43524e-09	0.236484	0.441469	0.133702	0.188344
6.77755	1.43525e-09	0.236481	0.441466	0.13371	0.188343
6.78333	1.43525e-09	0.236478	0.441463	0.133718	0.188342
6.78912	1.43526e-09	0.236475	0.44146	0.133725	0.188341
6.79492	1.43526e-09	0.236471	0.441457	0.133733	0.188339
6.80072	1.43527e-09	0.236468	0.441454	0.13374	0.188338
6.80653	1.43529e-09	0.23648	0.441442	0.133745	0.188333
6.81234	1.4353e-09	0.236474	0.441435	0.133752	0.188338
6.81816	1.4353e-09	0.236469	0.441428	0.133759	0.188343
6.82398	1.43531e-09	0.236464	0.441422	0.133766	0.188349
6.8298	1.43532e-09	0.236459	0.441415	0.133773	0.188354
6.83563	1.43532e-09	0.236453	0.441408	0.133779	0.188359
6.84147	1.43533e-09	0.236448	0.441402	0.133786	0.188364
6.84731	1.43533e-09	0.236443	0.441395	0.133792	0.18837
6.85316	1.43534e-09	0.236438	0.441388	0.133799	0.188375
6.85901	1.43535e-09	0.236372	0.441417	0.133815	0.188395
6.86486	1.43535e-09	0.236368	0.441414	0.133822	0.188396
6.87072	1.43536e-09	0.236365	0.44141	0.133828	0.188397
6.87659	1.43536e-09	0.236361	0.441406	0.133835	0.188398
6.88246	1.43537e-09	0.236357	0.441403	0.133841	0.188399
6.88834	1.43537e-09	0.236354	0.441399	0.133848	0.188399
6.89422	1.43538e-09	0.23635	0.441395	0.133854	0.1884
6.9001	1.43539e-09	0.236347	0.441392	0.13386	0.188401
6.90599	1.43539e-09	0.236343	0.441388	0.133866	0.188402
6.91189	1.43544e-09	0.236385	0.441358	0.133865	0.188392
6.91779	1.43545e-09	0.236382	0.441355	0.133872	0.188391
6.9237	1.43545e-09	0.236378	0.441352	0.133879	0.188391
6.92961	1.43546e-09	0.236375	0.441349	0.133885	0.188391
6.93552	1.43546e-09	0.236371	0.441345	0.133892	0.188391
6.94144	1.43547e-09	0.236368	0.441342	0.133899	0.188391
6.94737	1.43547e-09	0.236365	0.441339	0.133905	0.188391
6.9533	1.43548e-09	0.236361	0.441336	0.133912	0.188391
6.95924	1.43549e-09	0.236358	0.441333	0.133918	0.188391
6.96518	1.43552e-09	0.236379	0.441316	0.133921	0.188384
6.97113	1.43552e-09	0.236376	0.441313	0.133928	0.188383
6.97708	1.43553e-09	0.236373	0.44131	0.133935	0.188382
6.98303	1.43553e-09	0.23637	0.441308	0.133942	0.18838
6.989	1.43554e-09	0.236367	0.441305	0.133949	0.188379
6.99496	1.43555e-09	0.236364	0.441303	0.133956	0.188377
7.00093	1.43555e-09	0.236361	0.4413	0.133963	0.188376
7.00691	1.43556e-09	0.236358	0.441298	0.13397	0.188375
7.01289	1.43556e-09	0.236355	0.441295	0.133977	0.188373
7.01888	1.43559e-09	0.236373	0.44128	0.13398	0.188367
7.02487	1.43559e-09	0.23637	0.441278	0.133988	0.188365
7.03087	1.4356e-09	0.236366	0.441275	0.133995	0.188364
7.03687	1.4356e-09	0.236363	0.441272	0.134002	0.188362
7.04288	1.43561e-09	0.23636	0.44127	0.134009	0.188361
7.04889	1.43561e-09	0.236357	0.441267	0.134016	0.188359
7.05491	1.43562e-09	0.236354	0.441264	0.134023	0.188358
7.06093	1.43563e-09	0.236351	0.441262	0.13403	0.188357
7.06696	1.43563e-09	0.236348	0.441259	0.134037	0.188355
7.073	1.43566e-09	0.236366	0.441244	0.134041	0.188348
7.07903	1.43566e-09	0.236361	0.441238	0.134047	0.188354
7.08508	1.43567e-09	0.236356	0.441231	0.134054	0.188359
7.09113	1.43567e-09	0.236351	0.441225	0.13406	0.188364
7.09718	1.43568e-09	0.236346	0.441219	0.134066	0.18837
7.10324	1.43568e-09	0.236341	0.441212	0.134072	0.188375
7.1093	1.43569e-09	0.236336	0.441206	0.134078	0.18838
7.11537	1.4357e-09	0.236331	0.4412	0.134084	0.188386
7.12145	1.4357e-09	0.236326	0.441194	0.13409	0.188391
7.12753	1.4357e-09	0.236251	0.441228	0.134107	0.188414
7.13361	1.43571e-09	0.236248	0.441225	0.134113	0.188414
7.1397	1.43571e-09	0.236245	0.441222	0.134119	0.188414
7.1458	1.43572e-09	0.236242	0.441219	0.134125	0.188414
7.1519	1.43573e-09	0.236239	0.441217	0.134131	0.188414
7.15801	1.43573e-09	0.236235	0.441214	0.134137	0.188414
7.16412	1.43574e-09	0.236232	0.441211	0.134143	0.188414
7.17023	1.43574e-09	0.236229	0.441208	0.134149	0.188414
7.17636	1.43575e-09	0.236226	0.441206	0.134154	0.188414
7.18248	1.43578e-09	0.236257	0.441183	0.134154	0.188405
7.18861	1.43579e-09	0.236253	0.44118	0.134161	0.188406
7.19475	1.43579e-09	0.23625	0.441176	0.134167	0.188407
7.20089	1.4358e-09	0.236246	0.441173	0.134172	0.188408
7.20704	1.4358e-09	0.236243	0.44117	0.134178	0.188409
7.21319	1.43581e-09	0.23624	0.441166	0.134184	0.18841
7.21935	1.43582e-09	0.236236	0.441163	0.13419	0.188411
7.22552	1.43582e-09	0.236233	0.44116	0.134196	0.188412
7.23168	1.43583e-09	0.236229	0.441157	0.134201	0.188413
7.23786	1.43587e-09	0.236261	0.441133	0.134202	0.188405
7.24404	1.43587e-09	0.236258	0.44113	0.134208	0.188404
7.25022	1.43588e-09	0.236255	0.441128	0.134214	0.188403
7.25641	1.43589e-09	0.236252	0.441126	0.134221	0.188402
7.26261	1.43589e-09	0.236249	0.441123	0.134227	0.188401
7.26881	1.4359e-09	0.236246	0.441121	0.134233	0.1884
7.27501	1.4359e-09	0.236243	0.441118	0.13424	0.1884
7.28122	1.43591e-09	0.23624	0.441116	0.134246	0.188399
7.28744	1.43591e-09	0.236237	0.441114	0.134252	0.188398
7.29366	1.43594e-09	0.236259	0.441096	0.134254	0.18839
7.29989	1.43595e-09	0.236256	0.441094	0.134261	0.188389
7.30612	1.43595e-09	0.236253	0.441092	0.134267	0.188388
7.31236	1.43596e-09	0.23625	0.441089	0.134274	0.188386
7.3186	1.43596e-09	0.236248	0.441087	0.13428	0.188385
7.32485	1.43597e-09	0.236245	0.441085	0.134287	0.188384
7.3311	1.43597e-09	0.236242	0.441083	0.134293	0.188382
7.33736	1.43598e-09	0.236239	0.44108	0.134299	0.188381
7.34363	1.43598e-09	0.236236	0.441078	0.134306	0.18838
7.3499	1.43601e-09	0.236254	0.441064	0.134309	0.188373
7.35617	1.43601e-09	0.236251	0.441061	0.134316	0.188372
7.36245	1.43602e-09	0.236248	0.441059	0.134322	0.188371
7.36874	1.43602e-09	0.236245	0.441056	0.134329	0.18837
7.37503	1.43603e-09	0.236242	0.441054	0.134336	0.188369
7.38132	1.43604e-09	0.236239	0.441051	0.134342	0.188367
7.38763	1.43604e-09	0.236236	0.441049	0.134349	0.188366
7.39393	1.43605e-09	0.236233	0.441047	0.134355	0.188365
7.40025	1.43605e-09	0.23623	0.441045	0.134362	0.188364
7.40656	1.43607e-09	0.236241	0.441033	0.134366	0.188359
7.41289	1.43608e-09	0.236237	0.441027	0.134372	0.188364
7.41922	1.43608e-09	0.236232	0.441022	0.134378	0.188369
7.42555	1.43609e-09	0.236227	0.441016	0.134383	0.188374
7.43189	1.43609e-09	0.236222	0.44101	0.134389	0.188379
7.43823	1.4361e-09	0.236217	0.441004	0.134395	0.188384
7.44458	1.43611e-09	0.236212	0.440998	0.1344	0.188389
7.45094	1.43611e-09	0.236207	0.440993	0.134406	0.188394
7.4573	1.43612e-09	0.236203	0.440987	0.134411	0.188399
7.46367	1.43612e-09	0.236132	0.44102	0.134428	0.188421
7.47004	1.43612e-09	0.236129	0.441016	0.134433	0.188422
7.47642	1.43613e-09	0.236126	0.441013	0.134438	0.188423
7.4828	1.43613e-09	0.236122	0.44101	0.134443	0.188424
7.48919	1.43614e-09	0.236119	0.441008	0.134449	0.188425
7.49558	1.43614e-09	0.236115	0.441005	0.134454	0.188426
7.50198	1.43615e-09	0.236112	0.441002	0.134459	0.188427
7.50839	1.43615e-09	0.236109	0.440999	0.134464	0.188428
7.5148	1.43616e-09	0.236106	0.440996	0.134469	0.18843
7.52121	1.4362e-09	0.236138	0.440972	0.134468	0.188422
7.52763	1.43621e-09	0.236135	0.44097	0.134474	0.188422
7.53406	1.43621e-09	0.236132	0.440967	0.134479	0.188422
7.54049	1.43622e-09	0.236129	0.440965	0.134485	0.188422
7.54693	1.43622e-09	0.236126	0.440962	0.13449	0.188422
7.55337	1.43623e-09	0.236122	0.44096	0.134496	0.188422
7.55982	1.43623e-09	0.236119	0.440957	0.134501	0.188422
7.56628	1.43624e-09	0.236116	0.440955	0.134507	0.188422
7.57274	1.43624e-09	0.236113	0.440953	0.134512	0.188422
7.5792	1.43628e-09	0.236144	0.44093	0.134512	0.188414
7.58567	1.43629e-09	0.236141	0.440928	0.134518	0.188413
7.59215	1.43629e-09	0.236138	0.440926	0.134523	0.188413
7.59863	1.4363e-09	0.236135	0.440923	0.134529	0.188412
7.60512	1.4363e-09	0.236132	0.440921	0.134535	0.188412
7.61161	1.43631e-09	0.236129	0.440919	0.134541	0.188411
7.61811	1.43631e-09	0.236126	0.440917	0.134546	0.188411
7.62461	1.43632e-09	0.236123	0.440915	0.134552	0.18841
7.63112	1.43632e-09	0.23612	0.440912	0.134557	0.18841
7.63764	1.43636e-09	0.236148	0.440892	0.134558	0.188402
7.64416	1.43636e-09	0.236145	0.44089	0.134564	0.188401
7.65068	1.43637e-09	0.236142	0.440888	0.13457	0.1884
7.65722	1.43637e-09	0.236139	0.440886	0.134576	0.188399
7.66375	1.43638e-09	0.236136	0.440884	0.134582	0.188398
7.6703	1.43638e-09	0.236133	0.440882	0.134588	0.188397
7.67684	1.43639e-09	0.23613	0.44088	0.134594	0.188396
7.6834	1.43639e-09	0.236127	0.440878	0.1346	0.188395
7.68996	1.4364e-09	0.236125	0.440877	0.134605	0.188394
7.69652	1.43642e-09	0.236136	0.440866	0.134609	0.188389
7.70309	1.43642e-09	0.236134	0.440864	0.134615	0.188388
7.70967	1.43643e-09	0.236131	0.440862	0.134621	0.188386
7.71625	1.43643e-09	0.236128	0.44086	0.134627	0.188385
7.72284	1.43644e-09	0.236125	0.440858	0.134634	0.188384
7.72943	1.43644e-09	0.236122	0.440856	0.13464	0.188382
7.73603	1.43645e-09	0.236119	0.440854	0.134646	0.188381
7.74264	1.43645e-09	0.236116	0.440852	0.134651	0.18838
7.74925	1.43646e-09	0.236114	0.44085	0.134657	0.188379
7.75586	1.43648e-09	0.236132	0.440836	0.13466	0.188372
7.76248	1.43649e-09	0.236127	0.44083	0.134665	0.188378
7.76911	1.43649e-09	0.236122	0.440824	0.13467	0.188383
7.77574	1.4365e-09	0.236117	0.440819	0.134676	0.188389
7.78238	1.43651e-09	0.236112	0.440813	0.134681	0.188395
7.78903	1.43651e-09	0.236107	0.440807	0.134686	0.1884
7.79568	1.43652e-09	0.236102	0.440801	0.134691	0.188406
7.80233	1.43652e-09	0.236097	0.440796	0.134695	0.188412
7.80899	1.43653e-09	0.236092	0.44079	0.1347	0.188418
7.81566	1.43653e-09	0.23602	0.440823	0.134716	0.18844
7.82233	1.43654e-09	0.236017	0.440821	0.134721	0.18844
7.82901	1.43654e-09	0.236014	0.440819	0.134726	0.18844
7.8357	1.43654e-09	0.236011	0.440817	0.134731	0.188441
7.84238	1.43655e-09	0.236008	0.440815	0.134735	0.188441
7.84908	1.43655e-09	0.236005	0.440813	0.13474	0.188441
7.85578	1.43656e-09	0.236003	0.440811	0.134745	0.188441
7.86249	1.43656e-09	0.236	0.440809	0.134749	0.188441
7.8692	1.43657e-09	0.235997	0.440807	0.134754	0.188442
7.87592	1.43661e-09	0.236029	0.440785	0.134753	0.188433
7.88264	1.43661e-09	0.236026	0.440783	0.134758	0.188433
7.88937	1.43662e-09	0.236023	0.440781	0.134763	0.188433
7.89611	1.43662e-09	0.23602	0.440779	0.134768	0.188434
7.90285	1.43663e-09	0.236017	0.440777	0.134773	0.188434
7.9096	1.43663e-09	0.236014	0.440775	0.134778	0.188434
7.91635	1.43664e-09	0.236011	0.440773	0.134782	0.188434
7.92311	1.43664e-09	0.236008	0.440771	0.134787	0.188434
7.92987	1.43664e-09	0.236005	0.440769	0.134792	0.188434
7.93664	1.43668e-09	0.236027	0.440752	0.134793	0.188428
7.94342	1.43668e-09	0.236024	0.44075	0.134798	0.188429
7.9502	1.43669e-09	0.236021	0.440748	0.134803	0.188429
7.95699	1.43669e-09	0.236018	0.440745	0.134808	0.188429
7.96378	1.4367e-09	0.236015	0.440743	0.134813	0.188429
7.97058	1.4367e-09	0.236011	0.440741	0.134818	0.188429
7.97738	1.43671e-09	0.236008	0.440739	0.134823	0.18843
7.98419	1.43671e-09	0.236005	0.440737	0.134828	0.18843
7.99101	1.43672e-09	0.236002	0.440735	0.134833	0.18843
7.99783	1.43675e-09	0.236035	0.440712	0.134832	0.188421
8.00466	1.43676e-09	0.236032	0.44071	0.134837	0.18842
8.0115	1.43677e-09	0.23603	0.440708	0.134843	0.18842
8.01834	1.43677e-09	0.236027	0.440707	0.134848	0.188419
8.02518	1.43678e-09	0.236024	0.440705	0.134853	0.188418
8.03203	1.43678e-09	0.236021	0.440703	0.134859	0.188417
8.03889	1.43679e-09	0.236019	0.440702	0.134864	0.188416
8.04575	1.43679e-09	0.236016	0.4407	0.134869	0.188415
8.05262	1.43679e-09	0.236013	0.440699	0.134874	0.188414
8.0595	1.43682e-09	0.236034	0.440683	0.134876	0.188407
8.06638	1.43683e-09	0.236031	0.440681	0.134881	0.188406
8.07326	1.43683e-09	0.236029	0.44068	0.134887	0.188405
8.08016	1.43684e-09	0.236026	0.440678	0.134892	0.188404
8.08705	1.43684e-09	0.236023	0.440676	0.134898	0.188403
8.09396	1.43685e-09	0.23602	0.440675	0.134903	0.188402
8.10087	1.43685e-09	0.236017	0.440673	0.134908	0.188401
8.10779	1.43686e-09	0.236015	0.440671	0.134914	0.1884
8.11471	1.43686e-09	0.236012	0.44067	0.134919	0.188399
8.12163	1.43688e-09	0.236024	0.44066	0.134922	0.188395
8.12857	1.43689e-09	0.236021	0.440658	0.134928	0.188394
8.13551	1.43689e-09	0.236018	0.440656	0.134934	0.188393
8.14245	1.4369e-09	0.236015	0.440654	0.134939	0.188391
8.14941	1.4369e-09	0.236012	0.440652	0.134945	0.18839
8.15636	1.43691e-09	0.236009	0.440651	0.13495	0.188389
8.16333	1.43691e-09	0.236007	0.440649	0.134956	0.188388
8.1703	1.43692e-09	0.236004	0.440647	0.134961	0.188388
8.17727	1.43692e-09	0.236001	0.440646	0.134967	0.188387
8.18425	1.43695e-09	0.236022	0.44063	0.134968	0.18838
8.19124	1.43695e-09	0.236017	0.440624	0.134973	0.188385
8.19823	1.43696e-09	0.236012	0.440619	0.134978	0.188391
8.20523	1.43696e-09	0.236007	0.440613	0.134982	0.188397
8.21224	1.43697e-09	0.236002	0.440608	0.134987	0.188403
8.21925	1.43697e-09	0.235997	0.440602	0.134991	0.188409
8.22627	1.43698e-09	0.235992	0.440597	0.134996	0.188415
8.23329	1.43699e-09	0.235987	0.440591	0.135	0.188421
8.24032	1.43699e-09	0.235983	0.440586	0.135004	0.188427
8.24735	1.437e-09	0.235913	0.440619	0.135019	0.188449
8.25439	1.437e-09	0.23591	0.440617	0.135024	0.18845
8.26144	1.43701e-09	0.235907	0.440615	0.135028	0.18845
8.26849	1.43701e-09	0.235904	0.440613	0.135032	0.18845
8.27555	1.43702e-09	0.235901	0.440612	0.135037	0.18845
8.28262	1.43702e-09	0.235898	0.44061	0.135041	0.188451
8.28969	1.43702e-09	0.235895	0.440609	0.135045	0.188451
8.29677	1.43703e-09	0.235893	0.440607	0.135049	0.188451
8.30385	1.43703e-09	0.23589	0.440605	0.135053	0.188452
8.31094	1.43707e-09	0.235922	0.440583	0.135052	0.188443
8.31804	1.43708e-09	0.235919	0.440582	0.135056	0.188443
8.32514	1.43708e-09	0.235916	0.44058	0.135061	0.188444
8.33224	1.43708e-09	0.235913	0.440578	0.135065	0.188444
8.33936	1.43709e-09	0.23591	0.440576	0.135069	0.188444
8.34648	1.43709e-09	0.235907	0.440575	0.135074	0.188444
8.3536	1.4371e-09	0.235905	0.440573	0.135078	0.188444
8.36074	1.4371e-09	0.235902	0.440571	0.135082	0.188445
8.36787	1.43711e-09	0.235899	0.44057	0.135086	0.188445
8.37502	1.43714e-09	0.235922	0.440553	0.135086	0.188439
8.38217	1.43714e-09	0.235919	0.440551	0.135091	0.188439
8.38932	1.43715e-09	0.235916	0.440549	0.135096	0.188439
8.39649	1.43715e-09	0.235913	0.440548	0.1351	0.18844
8.40365	1.43716e-09	0.23591	0.440546	0.135105	0.18844
8.41083	1.43716e-09	0.235907	0.440544	0.135109	0.18844
8.41801	1.43717e-09	0.235904	0.440542	0.135114	0.18844
8.4252	1.43717e-09	0.235901	0.44054	0.135118	0.188441
8.43239	1.43718e-09	0.235898	0.440539	0.135122	0.188441
8.43959	1.43722e-09	0.235932	0.440515	0.13512	0.188432
8.44679	1.43722e-09	0.235929	0.440514	0.135125	0.188431
8.454	1.43723e-09	0.235926	0.440513	0.13513	0.18843
8.46122	1.43723e-09	0.235924	0.440512	0.135135	0.18843
8.46845	1.43724e-09	0.235921	0.44051	0.13514	0.188429
8.47568	1.43724e-09	0.235918	0.440509	0.135145	0.188428
8.48291	1.43725e-09	0.235916	0.440508	0.135149	0.188427
8.49015	1.43725e-09	0.235913	0.440507	0.135154	0.188426
8.4974	1.43726e-09	0.23591	0.440506	0.135159	0.188425
8.50466	1.43728e-09	0.235932	0.44049	0.13516	0.188418
8.51192	1.43729e-09	0.235929	0.440489	0.135165	0.188418
8.51918	1.43729e-09	0.235926	0.440487	0.13517	0.188417
8.52646	1.4373e-09	0.235923	0.440486	0.135175	0.188416
8.53374	1.4373e-09	0.23592	0.440485	0.135179	0.188416
8.54102	1.43731e-09	0.235918	0.440483	0.135184	0.188415
8.54831	1.43731e-09	0.235915	0.440482	0.135189	0.188414
8.55561	1.43732e-09	0.235912	0.44048	0.135194	0.188414
8.56292	1.43732e-09	0.235909	0.440479	0.135198	0.188413
8.57023	1.43734e-09	0.235923	0.440468	0.135201	0.188408
8.57754	1.43735e-09	0.23592	0.440467	0.135206	0.188407
8.58487	1.43735e-09	0.235918	0.440465	0.135211	0.188406
8.5922	1.43736e-09	0.235915	0.440464	0.135216	0.188405
8.59953	1.43736e-09	0.235912	0.440462	0.135221	0.188404
8.60687	1.43737e-09	0.235909	0.440461	0.135226	0.188403
8.61422	1.43737e-09	0.235907	0.44046	0.135231	0.188402
8.62158	1.43738e-09	0.235904	0.440458	0.135236	0.188401
8.62894	1.43738e-09	0.235901	0.440457	0.135241	0.188401
8.6363	1.43741e-09	0.235922	0.440442	0.135242	0.188394
8.64368	1.43741e-09	0.235918	0.440437	0.135247	0.188398
8.65106	1.43742e-09	0.235913	0.440433	0.135251	0.188403
8.65844	1.43742e-09	0.235909	0.440428	0.135255	0.188408
8.66583	1.43743e-09	0.235904	0.440424	0.135259	0.188413
8.67323	1.43743e-09	0.2359	0.440419	0.135264	0.188417
8.68064	1.43744e-09	0.235895	0.440415	0.135268	0.188422
8.68805	1.43744e-09	0.235891	0.44041	0.135272	0.188427
8.69547	1.43745e-09	0.235886	0.440406	0.135276	0.188432
8.70289	1.43744e-09	0.235805	0.440447	0.135293	0.188456
8.71032	1.43745e-09	0.235802	0.440445	0.135296	0.188457
8.71776	1.43745e-09	0.235799	0.440443	0.1353	0.188459
8.7252	1.43745e-09	0.235796	0.440441	0.135303	0.18846
8.73265	1.43746e-09	0.235793	0.440439	0.135307	0.188461
8.7401	1.43746e-09	0.23579	0.440437	0.13531	0.188463
8.74757	1.43747e-09	0.235787	0.440436	0.135313	0.188464
8.75503	1.43747e-09	0.235784	0.440434	0.135317	0.188466
8.76251	1.43748e-09	0.235781	0.440432	0.13532	0.188467
8.76999	1.43752e-09	0.235823	0.440404	0.135316	0.188457
8.77748	1.43753e-09	0.23582	0.440403	0.13532	0.188457
8.78497	1.43753e-09	0.235817	0.440402	0.135324	0.188458
8.79247	1.43754e-09	0.235814	0.4404	0.135327	0.188458
8.79998	1.43754e-09	0.235812	0.440399	0.135331	0.188458
8.80749	1.43755e-09	0.235809	0.440398	0.135335	0.188459
8.81501	1.43755e-09	0.235806	0.440396	0.135339	0.188459
8.82253	1.43756e-09	0.235803	0.440395	0.135342	0.188459
8.83007	1.43756e-09	0.235801	0.440394	0.135346	0.18846
8.83761	1.43759e-09	0.235824	0.440377	0.135345	0.188453
8.84515	1.4376e-09	0.235822	0.440376	0.135349	0.188453
8.8527	1.4376e-09	0.235819	0.440374	0.135353	0.188454
8.86026	1.43761e-09	0.235816	0.440373	0.135357	0.188454
8.86782	1.43761e-09	0.235813	0.440372	0.135361	0.188454
8.87539	1.43761e-09	0.23581	0.440371	0.135365	0.188454
8.88297	1.43762e-09	0.235808	0.440369	0.135369	0.188454
8.89056	1.43762e-09	0.235805	0.440368	0.135373	0.188455
8.89815	1.43763e-09	0.235802	0.440367	0.135376	0.188455
8.90574	1.43766e-09	0.235833	0.440346	0.135375	0.188446
8.91335	1.43767e-09	0.23583	0.440344	0.135379	0.188446
8.92096	1.43767e-09	0.235828	0.440343	0.135383	0.188446
8.92857	1.43768e-09	0.235825	0.440342	0.135387	0.188446
8.93619	1.43768e-09	0.235822	0.440341	0.135391	0.188446
8.94382	1.43769e-09	0.235819	0.44034	0.135395	0.188445
8.95146	1.43769e-09	0.235817	0.440339	0.135399	0.188445
8.9591	1.4377e-09	0.235814	0.440337	0.135403	0.188445
8.96675	1.4377e-09	0.235811	0.440336	0.135407	0.188445
8.97441	1.43773e-09	0.235839	0.440318	0.135406	0.188437
8.98207	1.43774e-09	0.235836	0.440316	0.135411	0.188437
8.98974	1.43774e-09	0.235833	0.440315	0.135415	0.188436
8.99741	1.43775e-09	0.235831	0.440314	0.135419	0.188435
9.00509	1.43775e-09	0.235828	0.440313	0.135424	0.188435
9.01278	1.43776e-09	0.235825	0.440312	0.135428	0.188434
9.02048	1.43776e-09	0.235823	0.440311	0.135432	0.188434
9.02818	1.43777e-09	0.23582	0.44031	0.135436	0.188433
9.03588	1.43777e-09	0.235818	0.44031	0.13544	0.188432
9.0436	1.43779e-09	0.235832	0.440298	0.135442	0.188427
9.05132	1.4378e-09	0.23583	0.440297	0.135447	0.188427
9.05905	1.4378e-09	0.235827	0.440296	0.135451	0.188426
9.06678	1.43781e-09	0.235824	0.440295	0.135456	0.188425
9.07452	1.43781e-09	0.235822	0.440294	0.13546	0.188424
9.08227	1.43782e-09	0.235819	0.440293	0.135465	0.188423
9.09002	1.43782e-09	0.235816	0.440293	0.135469	0.188422
9.09778	1.43783e-09	0.235814	0.440292	0.135473	0.188421
9.10555	1.43783e-09	0.235811	0.440291	0.135478	0.188421
9.11332	1.43786e-09	0.235832	0.440276	0.135478	0.188414
9.1211	1.43786e-09	0.235829	0.440275	0.135483	0.188413
9.12889	1.43787e-09	0.235827	0.440274	0.135488	0.188412
9.13669	1.43787e-09	0.235824	0.440272	0.135492	0.188412
9.14449	1.43788e-09	0.235821	0.440271	0.135497	0.188411
9.15229	1.43788e-09	0.235818	0.44027	0.135501	0.18841
9.16011	1.43789e-09	0.235816	0.440269	0.135506	0.18841
9.16793	1.43789e-09	0.235813	0.440268	0.13551	0.188409
9.17575	1.4379e-09	0.23581	0.440267	0.135514	0.188408
9.18359	1.43792e-09	0.235825	0.440256	0.135516	0.188403
9.19143	1.43792e-09	0.23582	0.440251	0.13552	0.188408
9.19928	1.43793e-09	0.235816	0.440247	0.135524	0.188414
9.20713	1.43793e-09	0.235811	0.440242	0.135528	0.188419
9.21499	1.43794e-09	0.235807	0.440238	0.135531	0.188424
9.22286	1.43794e-09	0.235802	0.440234	0.135535	0.188429
9.23073	1.43795e-09	0.235798	0.440229	0.135539	0.188434
9.23861	1.43795e-09	0.235793	0.440225	0.135542	0.18844
9.2465	1.43796e-09	0.235789	0.440221	0.135546	0.188445
9.25439	1.43796e-09	0.235721	0.440254	0.135559	0.188466
9.26229	1.43797e-09	0.235718	0.440253	0.135563	0.188467
9.2702	1.43797e-09	0.235716	0.440252	0.135566	0.188467
9.27812	1.43797e-09	0.235713	0.440251	0.135569	0.188467
9.28604	1.43798e-09	0.23571	0.44025	0.135572	0.188468
9.29396	1.43798e-09	0.235708	0.440249	0.135575	0.188468
9.3019	1.43799e-09	0.235705	0.440248	0.135578	0.188469
9.30984	1.43799e-09	0.235702	0.440248	0.135581	0.188469
9.31779	1.438e-09	0.2357	0.440247	0.135584	0.188469
9.32574	1.43803e-09	0.235723	0.440231	0.135583	0.188463
9.33371	1.43803e-09	0.23572	0.44023	0.135586	0.188464
9.34167	1.43804e-09	0.235717	0.440229	0.13559	0.188464
9.34965	1.43804e-09	0.235715	0.440228	0.135593	0.188464
9.35763	1.43804e-09	0.235712	0.440227	0.135596	0.188465
9.36562	1.43805e-09	0.235709	0.440226	0.135599	0.188465
9.37362	1.43805e-09	0.235707	0.440225	0.135602	0.188466
9.38162	1.43806e-09	0.235704	0.440225	0.135606	0.188466
9.38963	1.43806e-09	0.235701	0.440224	0.135609	0.188466
9.39765	1.4381e-09	0.235733	0.440203	0.135606	0.188458
9.40567	1.4381e-09	0.235731	0.440202	0.135609	0.188458
9.4137	1.43811e-09	0.235728	0.440201	0.135613	0.188458
9.42174	1.43811e-09	0.235725	0.4402	0.135616	0.188459
9.42978	1.43812e-09	0.235722	0.440199	0.13562	0.188459
9.43783	1.43812e-09	0.23572	0.440198	0.135623	0.188459
9.44589	1.43812e-09	0.235717	0.440197	0.135626	0.188459
9.45395	1.43813e-09	0.235714	0.440196	0.13563	0.18846
9.46202	1.43813e-09	0.235712	0.440195	0.135633	0.18846
9.4701	1.43816e-09	0.235735	0.44018	0.135632	0.188454
9.47819	1.43817e-09	0.235732	0.440178	0.135636	0.188455
9.48628	1.43817e-09	0.235729	0.440177	0.135639	0.188455
9.49438	1.43818e-09	0.235726	0.440175	0.135643	0.188456
9.50248	1.43818e-09	0.235723	0.440174	0.135646	0.188457
9.5106	1.43819e-09	0.23572	0.440173	0.135649	0.188458
9.51871	1.43819e-09	0.235717	0.440171	0.135653	0.188459
9.52684	1.4382e-09	0.235714	0.44017	0.135656	0.18846
9.53497	1.4382e-09	0.235711	0.440169	0.135659	0.188461
9.54312	1.43824e-09	0.235749	0.440143	0.135656	0.188452
9.55126	1.43825e-09	0.235747	0.440143	0.13566	0.188451
9.55942	1.43825e-09	0.235744	0.440142	0.135664	0.18845
9.56758	1.43826e-09	0.235741	0.440141	0.135667	0.18845
9.57575	1.43826e-09	0.235739	0.440141	0.135671	0.188449
9.58392	1.43827e-09	0.235736	0.44014	0.135675	0.188449
9.5921	1.43827e-09	0.235734	0.44014	0.135679	0.188448
9.60029	1.43828e-09	0.235731	0.440139	0.135682	0.188448
9.60849	1.43828e-09	0.235728	0.440139	0.135686	0.188447
9.61669	1.4383e-09	0.235743	0.440128	0.135687	0.188442
9.6249	1.43831e-09	0.23574	0.440127	0.135691	0.188442
9.63312	1.43831e-09	0.235738	0.440126	0.135695	0.188441
9.64134	1.43832e-09	0.235735	0.440125	0.135699	0.18844
9.64958	1.43832e-09	0.235732	0.440125	0.135703	0.18844
9.65781	1.43833e-09	0.23573	0.440124	0.135707	0.188439
9.66606	1.43833e-09	0.235727	0.440123	0.135711	0.188439
9.67431	1.43834e-09	0.235725	0.440123	0.135715	0.188438
9.68257	1.43834e-09	0.235722	0.440122	0.135718	0.188437
9.69084	1.43837e-09	0.235746	0.440106	0.135718	0.18843
9.69911	1.43837e-09	0.235743	0.440105	0.135722	0.188429
9.70739	1.43838e-09	0.23574	0.440104	0.135726	0.188429
9.71568	1.43838e-09	0.235738	0.440104	0.135731	0.188428
9.72397	1.43839e-09	0.235735	0.440103	0.135735	0.188427
9.73227	1.43839e-09	0.235732	0.440102	0.135739	0.188427
9.74058	1.4384e-09	0.23573	0.440101	0.135743	0.188426
9.7489	1.4384e-09	0.235727	0.440101	0.135747	0.188426
9.75722	1.43841e-09	0.235724	0.4401	0.13575	0.188425
9.76555	1.43843e-09	0.235748	0.440084	0.13575	0.188418
9.77389	1.43844e-09	0.235745	0.440083	0.135754	0.188417
9.78223	1.43844e-09	0.235743	0.440082	0.135759	0.188416
9.79059	1.43845e-09	0.23574	0.440081	0.135763	0.188416
9.79894	1.43845e-09	0.235737	0.440081	0.135767	0.188415
9.80731	1.43846e-09	0.235734	0.44008	0.135771	0.188414
9.81568	1.43846e-09	0.235732	0.440079	0.135776	0.188414
9.82406	1.43847e-09	0.235729	0.440078	0.13578	0.188413
9.83245	1.43847e-09	0.235726	0.440078	0.135784	0.188412
9.84085	1.4385e-09	0.235741	0.440067	0.135785	0.188407
9.84925	1.4385e-09	0.235736	0.440062	0.135789	0.188413
9.85766	1.43851e-09	0.235731	0.440058	0.135792	0.188419
9.86607	1.43851e-09	0.235727	0.440053	0.135795	0.188425
9.87449	1.43852e-09	0.235722	0.440049	0.135799	0.188431
9.88292	1.43852e-09	0.235717	0.440044	0.135802	0.188436
9.89136	1.43853e-09	0.235713	0.44004	0.135805	0.188442
9.89981	1.43853e-09	0.235708	0.440036	0.135808	0.188448
9.90826	1.43854e-09	0.235703	0.440032	0.135811	0.188454
9.91672	1.43855e-09	0.235642	0.440061	0.135823	0.188474
9.92518	1.43855e-09	0.235639	0.44006	0.135826	0.188475
9.93366	1.43855e-09	0.235637	0.44006	0.135829	0.188475
9.94214	1.43856e-09	0.235634	0.440059	0.135831	0.188475
9.95063	1.43856e-09	0.235632	0.440059	0.135834	0.188475
9.95912	1.43857e-09	0.235629	0.440058	0.135837	0.188476
9.96762	1.43857e-09	0.235627	0.440058	0.135839	0.188476
9.97613	1.43857e-09	0.235624	0.440058	0.135842	0.188477
9.98465	1.43858e-09	0.235621	0.440057	0.135844	0.188477
9.99318	1.43861e-09	0.235645	0.440041	0.135843	0.188471
10.0017	1.43861e-09	0.235643	0.440041	0.135846	0.188471
10.0102	1.43862e-09	0.23564	0.44004	0.135849	0.188471
10.0188	1.43862e-09	0.235637	0.44004	0.135851	0.188472
10.0273	1.43863e-09	0.235635	0.440039	0.135854	0.188472
10.0359	1.43863e-09	0.235632	0.440038	0.135857	0.188472
10.0445	1.43864e-09	0.235629	0.440038	0.13586	0.188473
10.053	1.43864e-09	0.235627	0.440037	0.135862	0.188473
10.0616	1.43864e-09	0.235624	0.440037	0.135865	0.188474
10.0702	1.43868e-09	0.235656	0.440016	0.135862	0.188465
10.0788	1.43868e-09	0.235654	0.440016	0.135865	0.188466
10.0874	1.43869e-09	0.235651	0.440015	0.135868	0.188466
10.096	1.43869e-09	0.235648	0.440014	0.135871	0.188466
10.1047	1.4387e-09	0.235645	0.440014	0.135874	0.188467
10.1133	1.4387e-09	0.235643	0.440013	0.135877	0.188467
10.1219	1.43871e-09	0.23564	0.440013	0.13588	0.188468
10.1306	1.43871e-09	0.235637	0.440012	0.135883	0.188468
10.1392	1.43871e-09	0.235635	0.440012	0.135885	0.188468
10.1479	1.43875e-09	0.235659	0.439995	0.135884	0.188462
10.1565	1.43875e-09	0.235656	0.439995	0.135887	0.188462
10.1652	1.43876e-09	0.235653	0.439994	0.13589	0.188463
10.1739	1.43876e-09	0.23565	0.439993	0.135894	0.188463
10.1826	1.43876e-09	0.235647	0.439993	0.135897	0.188463
10.1913	1.43877e-09	0.235645	0.439992	0.1359	0.188464
10.2	1.43877e-09	0.235642	0.439991	0.135903	0.188464
10.2087	1.43878e-09	0.235639	0.439991	0.135906	0.188464
10.2174	1.43878e-09	0.235636	0.43999	0.135909	0.188465
10.2261	1.43882e-09	0.235669	0.439969	0.135906	0.188456
10.2348	1.43882e-09	0.235666	0.439969	0.135909	0.188456
10.2436	1.43883e-09	0.235663	0.439968	0.135913	0.188456
10.2523	1.43883e-09	0.23566	0.439968	0.135916	0.188456
10.2611	1.43884e-09	0.235658	0.439967	0.135919	0.188456
10.2698	1.43884e-09	0.235655	0.439967	0.135923	0.188455
10.2786	1.43885e-09	0.235652	0.439966	0.135926	0.188455
10.2874	1.43885e-09	0.23565	0.439966	0.135929	0.188455
10.2962	1.43886e-09	0.235647	0.439965	0.135932	0.188455
10.3049	1.43888e-09	0.235666	0.439952	0.135932	0.18845
10.3137	1.43889e-09	0.235664	0.439952	0.135936	0.188449
10.3225	1.43889e-09	0.235661	0.439951	0.135939	0.188449
10.3314	1.4389e-09	0.235658	0.439951	0.135943	0.188448
10.3402	1.4389e-09	0.235656	0.43995	0.135946	0.188448
10.349	1.43891e-09	0.235653	0.43995	0.13595	0.188448
10.3578	1.43891e-09	0.23565	0.439949	0.135953	0.188447
10.3667	1.43892e-09	0.235648	0.439949	0.135957	0.188447
10.3755	1.43892e-09	0.235645	0.439949	0.13596	0.188447
10.3844	1.43895e-09	0.235671	0.439931	0.135959	0.188439
10.3933	1.43896e-09	0.235669	0.439931	0.135962	0.188438
10.4021	1.43896e-09	0.235666	0.43993	0.135966	0.188438
10.411	1.43896e-09	0.235663	0.43993	0.13597	0.188437
10.4199	1.43897e-09	0.235661	0.439929	0.135974	0.188436
10.4288	1.43897e-09	0.235658	0.439929	0.135977	0.188436
10.4377	1.43898e-09	0.235655	0.439929	0.135981	0.188435
10.4466	1.43898e-09	0.235653	0.439928	0.135984	0.188434
10.4555	1.43899e-09	0.23565	0.439928	0.135988	0.188434
10.4645	1.43902e-09	0.235674	0.439912	0.135987	0.188427
10.4734	1.43902e-09	0.235671	0.439912	0.135991	0.188426
10.4823	1.43903e-09	0.235669	0.439911	0.135995	0.188425
10.4913	1.43903e-09	0.235666	0.439911	0.135999	0.188425
10.5002	1.43904e-09	0.235663	0.43991	0.136003	0.188424
10.5092	1.43904e-09	0.23566	0.43991	0.136006	0.188423
10.5182	1.43905e-09	0.235658	0.43991	0.13601	0.188423
10.5272	1.43905e-09	0.235655	0.439909	0.136014	0.188422
10.5361	1.43905e-09	0.235652	0.439909	0.136018	0.188421
10.5451	1.43908e-09	0.235667	0.439898	0.136019	0.188416
10.5541	1.43908e-09	0.235663	0.439895	0.136022	0.188421
10.5632	1.43909e-09	0.235658	0.439891	0.136025	0.188426
10.5722	1.43909e-09	0.235654	0.439888	0.136028	0.18843
10.5812	1.4391e-09	0.235649	0.439884	0.136031	0.188435
10.5902	1.4391e-09	0.235645	0.439881	0.136034	0.18844
10.5993	1.43911e-09	0.235641	0.439877	0.136037	0.188445
10.6083	1.43911e-09	0.235637	0.439874	0.13604	0.188449
10.6174	1.43912e-09	0.235632	0.439871	0.136043	0.188454
10.6264	1.43911e-09	0.235552	0.439912	0.136058	0.188478
10.6355	1.43911e-09	0.235549	0.439912	0.13606	0.188478
10.6446	1.43912e-09	0.235547	0.439912	0.136063	0.188479
10.6537	1.43912e-09	0.235544	0.439912	0.136065	0.188479
10.6628	1.43912e-09	0.235542	0.439911	0.136067	0.18848
10.6719	1.43913e-09	0.235539	0.439911	0.136069	0.18848
10.681	1.43913e-09	0.235537	0.439911	0.136071	0.188481
10.6901	1.43914e-09	0.235534	0.439911	0.136073	0.188481
10.6992	1.43914e-09	0.235532	0.439911	0.136075	0.188482
10.7084	1.43918e-09	0.235565	0.43989	0.136072	0.188473
10.7175	1.43918e-09	0.235562	0.43989	0.136074	0.188474
10.7267	1.43919e-09	0.235559	0.43989	0.136076	0.188474
10.7358	1.43919e-09	0.235557	0.43989	0.136079	0.188475
10.745	1.43919e-09	0.235554	0.43989	0.136081	0.188475
10.7542	1.4392e-09	0.235552	0.43989	0.136083	0.188475
10.7633	1.4392e-09	0.235549	0.43989	0.136086	0.188476
10.7725	1.43921e-09	0.235546	0.43989	0.136088	0.188476
10.7817	1.43921e-09	0.235544	0.439889	0.13609	0.188477
10.7909	1.43925e-09	0.235577	0.439869	0.136086	0.188468
10.8001	1.43925e-09	0.235574	0.439868	0.136089	0.18847
10.8094	1.43926e-09	0.235571	0.439867	0.136091	0.188471
10.8186	1.43926e-09	0.235568	0.439866	0.136093	0.188472
10.8278	1.43927e-09	0.235565	0.439865	0.136096	0.188474
10.8371	1.43927e-09	0.235562	0.439865	0.136098	0.188475
10.8463	1.43927e-09	0.235559	0.439864	0.1361	0.188477
10.8556	1.43928e-09	0.235556	0.439863	0.136102	0.188478
10.8649	1.43928e-09	0.235553	0.439863	0.136105	0.18848
10.8741	1.43933e-09	0.235587	0.439841	0.136101	0.188472
10.8834	1.43933e-09	0.235584	0.43984	0.136103	0.188472
10.8927	1.43933e-09	0.235581	0.43984	0.136106	0.188472
10.902	1.43934e-09	0.235579	0.43984	0.136109	0.188473
10.9113	1.43934e-09	0.235576	0.439839	0.136112	0.188473
10.9206	1.43935e-09	0.235573	0.439839	0.136114	0.188473
10.93	1.43935e-09	0.235571	0.439839	0.136117	0.188474
10.9393	1.43936e-09	0.235568	0.439839	0.136119	0.188474
10.9486	1.43936e-09	0.235565	0.439838	0.136122	0.188475
10.958	1.4394e-09	0.235598	0.439817	0.136118	0.188466
10.9673	1.4394e-09	0.235595	0.439817	0.136121	0.188466
10.9767	1.43941e-09	0.235593	0.439817	0.136124	0.188467
10.9861	1.43941e-09	0.23559	0.439816	0.136127	0.188467
10.9954	1.43942e-09	0.235587	0.439816	0.13613	0.188467
11.0048	1.43942e-09	0.235584	0.439816	0.136133	0.188467
11.0142	1.43943e-09	0.235581	0.439815	0.136135	0.188468
11.0236	1.43943e-09	0.235579	0.439815	0.136138	0.188468
11.033	1.43943e-09	0.235576	0.439815	0.136141	0.188468
11.0425	1.43947e-09	0.23561	0.439793	0.136137	0.18846
11.0519	1.43948e-09	0.235607	0.439793	0.13614	0.18846
11.0613	1.43948e-09	0.235604	0.439793	0.136143	0.18846
11.0708	1.43949e-09	0.235601	0.439792	0.136146	0.18846
11.0802	1.43949e-09	0.235599	0.439792	0.136149	0.18846
11.0897	1.4395e-09	0.235596	0.439792	0.136152	0.18846
11.0991	1.4395e-09	0.235593	0.439792	0.136155	0.18846
11.1086	1.4395e-09	0.23559	0.439791	0.136158	0.18846
11.1181	1.43951e-09	0.235588	0.439791	0.136161	0.18846
11.1276	1.43954e-09	0.235609	0.439777	0.13616	0.188454
11.1371	1.43954e-09	0.235606	0.439777	0.136163	0.188454
11.1466	1.43955e-09	0.235603	0.439777	0.136167	0.188453
11.1561	1.43955e-09	0.235601	0.439777	0.13617	0.188452
11.1656	1.43956e-09	0.235598	0.439777	0.136173	0.188452
11.1752	1.43956e-09	0.235595	0.439777	0.136177	0.188451
11.1847	1.43957e-09	0.235593	0.439777	0.13618	0.188451
11.1943	1.43957e-09	0.23559	0.439777	0.136183	0.18845
11.2038	1.43958e-09	0.235588	0.439777	0.136186	0.188449
11.2134	1.4396e-09	0.235612	0.439761	0.136185	0.188442
11.223	1.43961e-09	0.23561	0.439761	0.136188	0.188441
11.2325	1.43961e-09	0.235607	0.43976	0.136192	0.188441
11.2421	1.43962e-09	0.235604	0.43976	0.136195	0.18844
11.2517	1.43962e-09	0.235601	0.43976	0.136199	0.18844
11.2613	1.43963e-09	0.235599	0.43976	0.136202	0.18844
11.271	1.43963e-09	0.235596	0.43976	0.136205	0.188439
11.2806	1.43964e-09	0.235593	0.43976	0.136208	0.188439
11.2902	1.43964e-09	0.23559	0.43976	0.136212	0.188438
11.2998	1.43967e-09	0.235608	0.439748	0.136212	0.188433
11.3095	1.43967e-09	0.235605	0.439747	0.136216	0.188432
11.3191	1.43968e-09	0.235602	0.439747	0.136219	0.188432
11.3288	1.43968e-09	0.235599	0.439747	0.136223	0.188431
11.3385	1.43969e-09	0.235596	0.439746	0.136226	0.188431
11.3482	1.43969e-09	0.235593	0.439746	0.13623	0.18843
11.3578	1.4397e-09	0.235591	0.439746	0.136233	0.18843
11.3675	1.4397e-09	0.235588	0.439746	0.136237	0.188429
11.3773	1.43971e-09	0.235585	0.439746	0.13624	0.188429
11.387	1.43974e-09	0.235612	0.439728	0.136239	0.188421
11.3967	1.43974e-09	0.235607	0.439725	0.136242	0.188425
11.4064	1.43975e-09	0.235603	0.439722	0.136245	0.18843
11.4162	1.43975e-09	0.235599	0.439719	0.136248	0.188434
11.4259	1.43976e-09	0.235594	0.439717	0.136251	0.188438
11.4357	1.43976e-09	0.23559	0.439714	0.136254	0.188442
11.4454	1.43977e-09	0.235586	0.439711	0.136256	0.188447
11.4552	1.43977e-09	0.235582	0.439708	0.136259	0.188451
11.465	1.43978e-09	0.235578	0.439705	0.136262	0.188455
11.4748	1.43976e-09	0.235493	0.43975	0.136277	0.18848
11.4846	1.43977e-09	0.23549	0.43975	0.136279	0.18848
11.4944	1.43977e-09	0.235488	0.43975	0.136281	0.188481
11.5042	1.43978e-09	0.235485	0.43975	0.136283	0.188481
11.514	1.43978e-09	0.235483	0.439751	0.136285	0.188482
11.5238	1.43978e-09	0.23548	0.439751	0.136287	0.188482
11.5337	1.43979e-09	0.235478	0.439751	0.136289	0.188483
11.5435	1.43979e-09	0.235475	0.439751	0.13629	0.188483
11.5534	1.4398e-09	0.235472	0.439752	0.136292	0.188484
11.5632	1.43983e-09	0.235506	0.439731	0.136288	0.188475
11.5731	1.43984e-09	0.235504	0.439731	0.13629	0.188475
11.583	1.43984e-09	0.235501	0.439731	0.136292	0.188476
11.5929	1.43985e-09	0.235499	0.439731	0.136294	0.188476
11.6028	1.43985e-09	0.235496	0.439732	0.136296	0.188477
11.6127	1.43986e-09	0.235493	0.439732	0.136298	0.188477
11.6226	1.43986e-09	0.235491	0.439732	0.1363	0.188477
11.6325	1.43986e-09	0.235488	0.439732	0.136302	0.188478
11.6424	1.43987e-09	0.235486	0.439733	0.136303	0.188478
11.6524	1.4399e-09	0.235509	0.439717	0.136301	0.188472
11.6623	1.4399e-09	0.235506	0.439717	0.136303	0.188473
11.6723	1.43991e-09	0.235503	0.439717	0.136305	0.188475
11.6823	1.43991e-09	0.2355	0.439716	0.136307	0.188476
11.6922	1.43992e-09	0.235497	0.439716	0.136309	0.188478
11.7022	1.43992e-09	0.235494	0.439715	0.136311	0.188479
11.7122	1.43993e-09	0.235491	0.439715	0.136313	0.18848
11.7222	1.43993e-09	0.235489	0.439715	0.136315	0.188482
11.7322	1.43993e-09	0.235486	0.439714	0.136317	0.188483
11.7422	1.43998e-09	0.235529	0.439687	0.136311	0.188473
11.7522	1.43999e-09	0.235527	0.439687	0.136313	0.188473
11.7623	1.43999e-09	0.235524	0.439687	0.136316	0.188474
11.7723	1.44e-09	0.235521	0.439687	0.136318	0.188474
11.7824	1.44e-09	0.235518	0.439687	0.13632	0.188474
11.7924	1.44001e-09	0.235516	0.439687	0.136323	0.188475
11.8025	1.44001e-09	0.235513	0.439687	0.136325	0.188475
11.8126	1.44001e-09	0.23551	0.439687	0.136327	0.188475
11.8227	1.44002e-09	0.235507	0.439688	0.136329	0.188476
11.8328	1.44006e-09	0.23554	0.439667	0.136326	0.188467
11.8429	1.44006e-09	0.235537	0.439667	0.136328	0.188467
11.853	1.44007e-09	0.235535	0.439667	0.136331	0.188468
11.8631	1.44007e-09	0.235532	0.439667	0.136334	0.188468
11.8732	1.44007e-09	0.235529	0.439667	0.136336	0.188468
11.8833	1.44008e-09	0.235526	0.439667	0.136338	0.188468
11.8935	1.44008e-09	0.235523	0.439667	0.136341	0.188469
11.9036	1.44009e-09	0.235521	0.439667	0.136343	0.188469
11.9138	1.44009e-09	0.235518	0.439667	0.136346	0.188469
11.924	1.44013e-09	0.235543	0.439651	0.136344	0.188463
11.9342	1.44013e-09	0.235539	0.439651	0.136346	0.188464
11.9444	1.44013e-09	0.235536	0.43965	0.136349	0.188465
11.9545	1.44014e-09	0.235533	0.439649	0.136351	0.188466
11.9648	1.44014e-09	0.23553	0.439649	0.136354	0.188467
11.975	1.44015e-09	0.235527	0.439649	0.136357	0.188468
11.9852	1.44015e-09	0.235524	0.439648	0.136359	0.188469
11.9954	1.44016e-09	0.235521	0.439648	0.136361	0.18847
12.0057	1.44016e-09	0.235518	0.439647	0.136364	0.188471
12.0159	1.44021e-09	0.23556	0.439621	0.136359	0.188461
12.0262	1.44022e-09	0.235557	0.439621	0.136362	0.188461
12.0364	1.44022e-09	0.235554	0.439621	0.136365	0.18846
12.0467	1.44022e-09	0.235551	0.439621	0.136368	0.18846
12.057	1.44023e-09	0.235548	0.439621	0.136371	0.188459
12.0673	1.44023e-09	0.235546	0.439622	0.136374	0.188459
12.0776	1.44024e-09	0.235543	0.439622	0.136377	0.188458
12.0879	1.44024e-09	0.23554	0.439622	0.13638	0.188458
12.0982	1.44025e-09	0.235538	0.439622	0.136383	0.188458
12.1086	1.44027e-09	0.235555	0.439611	0.136382	0.188452
12.1189	1.44028e-09	0.235552	0.439611	0.136386	0.188452
12.1292	1.44028e-09	0.235549	0.439611	0.136389	0.188451
12.1396	1.44029e-09	0.235546	0.439611	0.136392	0.188451
12.15	1.44029e-09	0.235543	0.439611	0.136395	0.188451
12.1603	1.4403e-09	0.23554	0.439611	0.136398	0.188451
12.1707	1.4403e-09	0.235538	0.439611	0.136401	0.18845
12.1811	1.44031e-09	0.235535	0.439611	0.136404	0.18845
12.1915	1.44031e-09	0.235532	0.439611	0.136407	0.18845
12.2019	1.44035e-09	0.235562	0.439592	0.136405	0.188441
12.2123	1.44035e-09	0.235559	0.439592	0.136408	0.188441
12.2228	1.44036e-09	0.235556	0.439592	0.136412	0.18844
12.2332	1.44036e-09	0.235553	0.439592	0.136415	0.18844
12.2436	1.44037e-09	0.23555	0.439592	0.136419	0.188439
12.2541	1.44037e-09	0.235548	0.439592	0.136422	0.188439
12.2646	1.44038e-09	0.235545	0.439592	0.136425	0.188438
12.275	1.44038e-09	0.235542	0.439592	0.136428	0.188438
12.2855	1.44039e-09	0.235539	0.439592	0.136431	0.188437
12.296	1.44042e-09	0.235565	0.439575	0.13643	0.188429
12.3065	1.44042e-09	0.235562	0.439575	0.136434	0.188429
12.317	1.44043e-09	0.235559	0.439575	0.136437	0.188428
12.3275	1.44043e-09	0.235556	0.439575	0.136441	0.188428
12.338	1.44044e-09	0.235553	0.439575	0.136444	0.188428
12.3486	1.44044e-09	0.23555	0.439575	0.136448	0.188427
12.3591	1.44045e-09	0.235547	0.439574	0.136451	0.188427
12.3697	1.44045e-09	0.235545	0.439574	0.136454	0.188427
12.3802	1.44046e-09	0.235542	0.439574	0.136458	0.188426
12.3908	1.44049e-09	0.235561	0.439561	0.136458	0.18842
12.4014	1.44049e-09	0.235557	0.439558	0.13646	0.188425
12.412	1.4405e-09	0.235552	0.439554	0.136463	0.188431
12.4226	1.4405e-09	0.235547	0.439551	0.136466	0.188436
12.4332	1.44051e-09	0.235543	0.439548	0.136469	0.188441
12.4438	1.44051e-09	0.235538	0.439544	0.136472	0.188446
12.4544	1.44052e-09	0.235533	0.439541	0.136474	0.188451
12.465	1.44052e-09	0.235529	0.439538	0.136477	0.188456
12.4757	1.44053e-09	0.235524	0.439535	0.136479	0.188462
12.4863	1.44053e-09	0.23546	0.439567	0.136491	0.188482
12.497	1.44054e-09	0.235458	0.439567	0.136493	0.188482
12.5077	1.44054e-09	0.235455	0.439568	0.136494	0.188483
12.5183	1.44055e-09	0.235452	0.439568	0.136496	0.188483
12.529	1.44055e-09	0.23545	0.439569	0.136498	0.188483
12.5397	1.44056e-09	0.235447	0.43957	0.1365	0.188484
12.5504	1.44056e-09	0.235444	0.43957	0.136501	0.188484
12.5611	1.44056e-09	0.235442	0.439571	0.136503	0.188485
12.5719	1.44057e-09	0.235439	0.439571	0.136505	0.188485
12.5826	1.4406e-09	0.235463	0.439557	0.136502	0.188479
12.5933	1.4406e-09	0.23546	0.439557	0.136504	0.188479
12.6041	1.44061e-09	0.235457	0.439557	0.136506	0.188479
12.6148	1.44061e-09	0.235455	0.439558	0.136508	0.18848
12.6256	1.44062e-09	0.235452	0.439558	0.13651	0.18848
12.6364	1.44062e-09	0.235449	0.439559	0.136511	0.18848
12.6472	1.44063e-09	0.235447	0.439559	0.136513	0.188481
12.658	1.44063e-09	0.235444	0.43956	0.136515	0.188481
12.6688	1.44064e-09	0.235441	0.439561	0.136517	0.188482
12.6796	1.44067e-09	0.235475	0.43954	0.136512	0.188473
12.6904	1.44068e-09	0.235472	0.43954	0.136515	0.188473
12.7013	1.44068e-09	0.235469	0.439541	0.136517	0.188473
12.7121	1.44069e-09	0.235467	0.439541	0.136519	0.188474
12.723	1.44069e-09	0.235464	0.439541	0.136521	0.188474
12.7338	1.4407e-09	0.235461	0.439542	0.136523	0.188474
12.7447	1.4407e-09	0.235458	0.439542	0.136525	0.188474
12.7556	1.4407e-09	0.235455	0.439543	0.136527	0.188475
12.7665	1.44071e-09	0.235453	0.439543	0.136529	0.188475
12.7774	1.44074e-09	0.235477	0.439528	0.136527	0.188469
12.7883	1.44075e-09	0.235474	0.439527	0.136529	0.18847
12.7992	1.44075e-09	0.235471	0.439527	0.136531	0.188471
12.8101	1.44076e-09	0.235468	0.439527	0.136533	0.188472
12.8211	1.44076e-09	0.235465	0.439527	0.136535	0.188473
12.832	1.44077e-09	0.235462	0.439526	0.136537	0.188475
12.843	1.44077e-09	0.235458	0.439526	0.136539	0.188476
12.8539	1.44077e-09	0.235455	0.439526	0.136541	0.188477
12.8649	1.44078e-09	0.235452	0.439526	0.136543	0.188479
12.8759	1.44083e-09	0.235497	0.439498	0.136537	0.188468
12.8869	1.44083e-09	0.235494	0.439498	0.13654	0.188468
12.8979	1.44084e-09	0.235491	0.439499	0.136542	0.188468
12.9089	1.44084e-09	0.235488	0.439499	0.136545	0.188468
12.9199	1.44085e-09	0.235485	0.439499	0.136547	0.188468
12.9309	1.44085e-09	0.235482	0.4395	0.13655	0.188468
12.942	1.44086e-09	0.235479	0.4395	0.136552	0.188468
12.953	1.44086e-09	0.235476	0.4395	0.136555	0.188469
12.9641	1.44087e-09	0.235473	0.439501	0.136557	0.188469
12.9752	1.44091e-09	0.235507	0.43948	0.136553	0.18846
12.9862	1.44091e-09	0.235504	0.43948	0.136556	0.18846
12.9973	1.44092e-09	0.235501	0.43948	0.136559	0.188461
13.0084	1.44092e-09	0.235498	0.439479	0.136561	0.188462
13.0195	1.44093e-09	0.235494	0.439479	0.136564	0.188463
13.0306	1.44093e-09	0.235491	0.439479	0.136566	0.188463
13.0418	1.44094e-09	0.235488	0.439479	0.136569	0.188464
13.0529	1.44094e-09	0.235485	0.439479	0.136571	0.188465
13.064	1.44094e-09	0.235482	0.439479	0.136574	0.188466
13.0752	1.44099e-09	0.235522	0.439454	0.136569	0.188456
13.0864	1.441e-09	0.235519	0.439454	0.136572	0.188455
13.0975	1.441e-09	0.235516	0.439454	0.136575	0.188455
13.1087	1.44101e-09	0.235513	0.439455	0.136578	0.188455
13.1199	1.44101e-09	0.23551	0.439455	0.136581	0.188454
13.1311	1.44102e-09	0.235507	0.439455	0.136584	0.188454
13.1423	1.44102e-09	0.235504	0.439456	0.136587	0.188454
13.1535	1.44103e-09	0.235501	0.439456	0.13659	0.188453
13.1648	1.44103e-09	0.235498	0.439456	0.136592	0.188453
13.176	1.44106e-09	0.235518	0.439443	0.136592	0.188447
13.1872	1.44106e-09	0.235515	0.439443	0.136595	0.188446
13.1985	1.44107e-09	0.235512	0.439444	0.136598	0.188446
13.2098	1.44107e-09	0.235509	0.439444	0.136602	0.188446
13.2211	1.44108e-09	0.235506	0.439444	0.136605	0.188445
13.2323	1.44109e-09	0.235503	0.439444	0.136608	0.188445
13.2436	1.44109e-09	0.2355	0.439445	0.136611	0.188445
13.2549	1.4411e-09	0.235497	0.439445	0.136614	0.188444
13.2663	1.4411e-09	0.235494	0.439445	0.136617	0.188444
13.2776	1.44114e-09	0.235524	0.439426	0.136614	0.188435
13.2889	1.44114e-09	0.235521	0.439426	0.136618	0.188435
13.3003	1.44115e-09	0.235518	0.439427	0.136621	0.188434
13.3116	1.44115e-09	0.235515	0.439427	0.136625	0.188434
13.323	1.44116e-09	0.235512	0.439427	0.136628	0.188433
13.3344	1.44116e-09	0.235509	0.439427	0.136632	0.188433
13.3457	1.44117e-09	0.235505	0.439427	0.136635	0.188433
13.3571	1.44117e-09	0.235502	0.439427	0.136638	0.188432
13.3685	1.44118e-09	0.235499	0.439428	0.136641	0.188432
13.38	1.44121e-09	0.235519	0.439415	0.136641	0.188426
13.3914	1.44121e-09	0.235516	0.439414	0.136645	0.188425
13.4028	1.44122e-09	0.235513	0.439414	0.136648	0.188424
13.4143	1.44122e-09	0.23551	0.439414	0.136652	0.188424
13.4257	1.44123e-09	0.235506	0.439415	0.136656	0.188423
13.4372	1.44123e-09	0.235503	0.439415	0.136659	0.188423
13.4486	1.44124e-09	0.2355	0.439415	0.136663	0.188422
13.4601	1.44124e-09	0.235497	0.439415	0.136666	0.188422
13.4716	1.44125e-09	0.235494	0.439415	0.136669	0.188422
13.4831	1.44128e-09	0.235524	0.439396	0.136668	0.188413
13.4946	1.44129e-09	0.235519	0.439393	0.136671	0.188418
13.5061	1.4413e-09	0.235514	0.43939	0.136674	0.188423
13.5177	1.4413e-09	0.235509	0.439387	0.136677	0.188428
13.5292	1.44131e-09	0.235504	0.439384	0.136679	0.188432
13.5408	1.44131e-09	0.2355	0.439381	0.136682	0.188437
13.5523	1.44132e-09	0.235495	0.439378	0.136685	0.188442
13.5639	1.44132e-09	0.23549	0.439375	0.136688	0.188447
13.5755	1.44133e-09	0.235485	0.439372	0.13669	0.188452
13.5871	1.44133e-09	0.23541	0.439411	0.136704	0.188475
13.5987	1.44133e-09	0.235407	0.439411	0.136706	0.188476
13.6103	1.44134e-09	0.235404	0.439412	0.136707	0.188478
13.6219	1.44134e-09	0.2354	0.439412	0.136709	0.188479
13.6335	1.44134e-09	0.235397	0.439412	0.13671	0.18848
13.6452	1.44135e-09	0.235394	0.439413	0.136712	0.188481
13.6568	1.44135e-09	0.235391	0.439413	0.136713	0.188482
13.6685	1.44136e-09	0.235388	0.439413	0.136715	0.188484
13.6801	1.44136e-09	0.235385	0.439414	0.136716	0.188485
13.6918	1.44141e-09	0.235431	0.439386	0.136709	0.188474
13.7035	1.44142e-09	0.235428	0.439387	0.136711	0.188474
13.7152	1.44142e-09	0.235425	0.439387	0.136713	0.188474
13.7269	1.44143e-09	0.235422	0.439388	0.136715	0.188475
13.7386	1.44143e-09	0.235419	0.439389	0.136717	0.188475
13.7504	1.44144e-09	0.235416	0.439389	0.136719	0.188475
13.7621	1.44144e-09	0.235413	0.43939	0.136721	0.188475
13.7739	1.44145e-09	0.235411	0.439391	0.136723	0.188476
13.7856	1.44145e-09	0.235408	0.439392	0.136725	0.188476
13.7974	1.44149e-09	0.235441	0.439371	0.13672	0.188467
13.8092	1.44149e-09	0.235438	0.439371	0.136722	0.188468
13.821	1.4415e-09	0.235435	0.439371	0.136725	0.188469
13.8328	1.4415e-09	0.235432	0.439371	0.136726	0.18847
13.8446	1.44151e-09	0.235428	0.439371	0.136728	0.188472
13.8564	1.44151e-09	0.235425	0.439372	0.13673	0.188473
13.8682	1.44152e-09	0.235422	0.439372	0.136732	0.188474
13.8801	1.44152e-09	0.235419	0.439372	0.136734	0.188475
13.8919	1.44153e-09	0.235416	0.439372	0.136736	0.188477
13.9038	1.44158e-09	0.23546	0.439345	0.13673	0.188466
13.9156	1.44158e-09	0.235457	0.439345	0.136732	0.188466
13.9275	1.44159e-09	0.235454	0.439346	0.136734	0.188466
13.9394	1.44159e-09	0.235451	0.439346	0.136737	0.188466
13.9513	1.4416e-09	0.235448	0.439347	0.136739	0.188466
13.9632	1.4416e-09	0.235445	0.439347	0.136741	0.188466
13.9751	1.44161e-09	0.235442	0.439348	0.136744	0.188467
13.9871	1.44161e-09	0.235439	0.439349	0.136746	0.188467
13.999	1.44162e-09	0.235436	0.439349	0.136748	0.188467
14.011	1.44165e-09	0.235461	0.439333	0.136746	0.18846
14.0229	1.44166e-09	0.235458	0.439333	0.136748	0.188461
14.0349	1.44166e-09	0.235454	0.439333	0.136751	0.188462
14.0469	1.44167e-09	0.235451	0.439333	0.136753	0.188463
14.0589	1.44167e-09	0.235448	0.439333	0.136756	0.188464
14.0709	1.44168e-09	0.235444	0.439333	0.136758	0.188465
14.0829	1.44168e-09	0.235441	0.439333	0.13676	0.188466
14.0949	1.44169e-09	0.235438	0.439333	0.136763	0.188467
14.1069	1.44169e-09	0.235434	0.439333	0.136765	0.188468
14.119	1.44174e-09	0.235478	0.439305	0.136759	0.188458
14.131	1.44175e-09	0.235475	0.439305	0.136762	0.188457
14.1431	1.44175e-09	0.235472	0.439306	0.136765	0.188457
14.1552	1.44176e-09	0.235469	0.439306	0.136768	0.188457
14.1673	1.44176e-09	0.235466	0.439307	0.136771	0.188457
14.1794	1.44177e-09	0.235463	0.439307	0.136774	0.188456
14.1915	1.44177e-09	0.23546	0.439308	0.136776	0.188456
14.2036	1.44178e-09	0.235457	0.439308	0.136779	0.188456
14.2157	1.44178e-09	0.235453	0.439309	0.136782	0.188456
14.2278	1.44182e-09	0.235486	0.439289	0.136779	0.188447
14.24	1.44183e-09	0.235483	0.439289	0.136782	0.188446
14.2521	1.44183e-09	0.235479	0.439289	0.136785	0.188446
14.2643	1.44184e-09	0.235476	0.43929	0.136788	0.188446
14.2765	1.44184e-09	0.235473	0.43929	0.136791	0.188446
14.2887	1.44185e-09	0.23547	0.43929	0.136794	0.188445
14.3009	1.44185e-09	0.235467	0.439291	0.136797	0.188445
14.3131	1.44186e-09	0.235464	0.439291	0.1368	0.188445
14.3253	1.44187e-09	0.235461	0.439292	0.136803	0.188445
14.3375	1.4419e-09	0.235483	0.439277	0.136802	0.188438
14.3498	1.4419e-09	0.23548	0.439277	0.136805	0.188438
14.362	1.44191e-09	0.235476	0.439278	0.136809	0.188437
14.3743	1.44191e-09	0.235473	0.439278	0.136812	0.188437
14.3866	1.44192e-09	0.23547	0.439278	0.136815	0.188437
14.3988	1.44192e-09	0.235467	0.439278	0.136819	0.188436
14.4111	1.44193e-09	0.235463	0.439279	0.136822	0.188436
14.4234	1.44194e-09	0.23546	0.439279	0.136825	0.188436
14.4358	1.44194e-09	0.235457	0.43928	0.136828	0.188435
14.4481	1.44198e-09	0.235489	0.439259	0.136826	0.188426
14.4604	1.44198e-09	0.235486	0.439259	0.136829	0.188425
14.4728	1.44199e-09	0.235483	0.43926	0.136833	0.188425
14.4851	1.442e-09	0.235479	0.43926	0.136837	0.188424
14.4975	1.442e-09	0.235476	0.43926	0.13684	0.188424
14.5099	1.44201e-09	0.235473	0.43926	0.136844	0.188423
14.5223	1.44201e-09	0.23547	0.439261	0.136847	0.188422
14.5346	1.44202e-09	0.235466	0.439261	0.136851	0.188422
14.5471	1.44202e-09	0.235463	0.439262	0.136854	0.188421
14.5595	1.44206e-09	0.235492	0.439243	0.136852	0.188413
14.5719	1.44207e-09	0.235487	0.439241	0.136855	0.188417
14.5843	1.44207e-09	0.235482	0.439238	0.136858	0.188422
14.5968	1.44208e-09	0.235477	0.439235	0.136861	0.188427
14.6093	1.44208e-09	0.235472	0.439232	0.136864	0.188431
14.6217	1.44209e-09	0.235467	0.43923	0.136867	0.188436
14.6342	1.44209e-09	0.235462	0.439227	0.13687	0.188441
14.6467	1.4421e-09	0.235457	0.439224	0.136872	0.188446
14.6592	1.44211e-09	0.235453	0.439222	0.136875	0.18845
14.6717	1.4421e-09	0.235379	0.43926	0.136888	0.188473
14.6843	1.44211e-09	0.235376	0.439261	0.13689	0.188474
14.6968	1.44211e-09	0.235372	0.439261	0.136891	0.188475
14.7093	1.44212e-09	0.235369	0.439262	0.136893	0.188476
14.7219	1.44212e-09	0.235366	0.439262	0.136894	0.188478
14.7345	1.44213e-09	0.235363	0.439263	0.136896	0.188479
14.747	1.44213e-09	0.23536	0.439263	0.136897	0.18848
14.7596	1.44214e-09	0.235357	0.439264	0.136898	0.188481
14.7722	1.44214e-09	0.235353	0.439265	0.1369	0.188482
14.7848	1.44219e-09	0.235399	0.439237	0.136893	0.188472
14.7975	1.4422e-09	0.235396	0.439238	0.136895	0.188472
14.8101	1.4422e-09	0.235393	0.439239	0.136897	0.188472
14.8227	1.44221e-09	0.23539	0.43924	0.136899	0.188472
14.8354	1.44221e-09	0.235387	0.439241	0.1369	0.188472
14.8481	1.44222e-09	0.235384	0.439242	0.136902	0.188472
14.8607	1.44222e-09	0.235381	0.439243	0.136904	0.188472
14.8734	1.44223e-09	0.235378	0.439244	0.136906	0.188473
14.8861	1.44223e-09	0.235375	0.439245	0.136907	0.188473
14.8988	1.44227e-09	0.235409	0.439224	0.136903	0.188464
14.9116	1.44228e-09	0.235406	0.439225	0.136905	0.188465
14.9243	1.44228e-09	0.235402	0.439225	0.136907	0.188466
14.937	1.44229e-09	0.235399	0.439225	0.136909	0.188467
14.9498	1.44229e-09	0.235396	0.439226	0.136911	0.188468
14.9625	1.4423e-09	0.235392	0.439226	0.136912	0.188469
14.9753	1.4423e-09	0.235389	0.439227	0.136914	0.18847
14.9881	1.44231e-09	0.235386	0.439227	0.136916	0.188471
15.0009	1.44231e-09	0.235383	0.439228	0.136918	0.188472
15.0137	1.44236e-09	0.235417	0.439206	0.136913	0.188464
15.0265	1.44236e-09	0.235414	0.439206	0.136915	0.188465
15.0394	1.44237e-09	0.235411	0.439206	0.136918	0.188466
15.0522	1.44237e-09	0.235407	0.439206	0.13692	0.188467
15.065	1.44238e-09	0.235404	0.439207	0.136922	0.188468
15.0779	1.44238e-09	0.2354	0.439207	0.136924	0.188469
15.0908	1.44239e-09	0.235397	0.439207	0.136926	0.18847
15.1037	1.44239e-09	0.235394	0.439207	0.136928	0.188471
15.1166	1.4424e-09	0.23539	0.439208	0.13693	0.188472
15.1295	1.44245e-09	0.235436	0.43918	0.136924	0.188461
15.1424	1.44246e-09	0.235432	0.43918	0.136926	0.188462
15.1553	1.44246e-09	0.235429	0.43918	0.136929	0.188463
15.1682	1.44247e-09	0.235425	0.43918	0.136931	0.188464
15.1812	1.44247e-09	0.235422	0.43918	0.136934	0.188465
15.1942	1.44248e-09	0.235418	0.43918	0.136936	0.188466
15.2071	1.44248e-09	0.235415	0.43918	0.136938	0.188467
15.2201	1.44249e-09	0.235411	0.439181	0.136941	0.188467
15.2331	1.44249e-09	0.235408	0.439181	0.136943	0.188468
15.2461	1.44255e-09	0.235453	0.439153	0.136937	0.188457
15.2591	1.44255e-09	0.235449	0.439154	0.13694	0.188457
15.2722	1.44256e-09	0.235446	0.439154	0.136943	0.188457
15.2852	1.44256e-09	0.235443	0.439155	0.136946	0.188456
15.2982	1.44257e-09	0.23544	0.439155	0.136949	0.188456
15.3113	1.44257e-09	0.235436	0.439156	0.136952	0.188456
15.3244	1.44258e-09	0.235433	0.439157	0.136955	0.188455
15.3375	1.44258e-09	0.23543	0.439158	0.136957	0.188455
15.3506	1.44259e-09	0.235427	0.439159	0.13696	0.188455
15.3637	1.44263e-09	0.235458	0.439139	0.136957	0.188446
15.3768	1.44263e-09	0.235455	0.439139	0.13696	0.188445
15.3899	1.44264e-09	0.235451	0.43914	0.136964	0.188445
15.403	1.44264e-09	0.235448	0.43914	0.136967	0.188445
15.4162	1.44265e-09	0.235444	0.439141	0.13697	0.188445
15.4294	1.44266e-09	0.235441	0.439141	0.136973	0.188445
15.4425	1.44266e-09	0.235438	0.439142	0.136976	0.188444
15.4557	1.44267e-09	0.235434	0.439142	0.136979	0.188444
15.4689	1.44267e-09	0.235431	0.439143	0.136982	0.188444
15.4821	1.44271e-09	0.235457	0.439127	0.13698	0.188437
15.4953	1.44271e-09	0.235453	0.439127	0.136984	0.188436
15.5086	1.44272e-09	0.23545	0.439127	0.136987	0.188435
15.5218	1.44273e-09	0.235446	0.439128	0.136991	0.188435
15.5351	1.44273e-09	0.235443	0.439128	0.136994	0.188434
15.5483	1.44274e-09	0.23544	0.439129	0.136998	0.188434
15.5616	1.44274e-09	0.235436	0.43913	0.137001	0.188433
15.5749	1.44275e-09	0.235433	0.43913	0.137004	0.188433
15.5882	1.44276e-09	0.23543	0.439131	0.137007	0.188432
15.6015	1.44279e-09	0.235462	0.439111	0.137005	0.188423
15.6148	1.4428e-09	0.235458	0.439111	0.137009	0.188422
15.6281	1.44281e-09	0.235454	0.439111	0.137013	0.188422
15.6415	1.44281e-09	0.235451	0.439111	0.137016	0.188421
15.6548	1.44282e-09	0.235447	0.439112	0.13702	0.188421
15.6682	1.44282e-09	0.235444	0.439112	0.137024	0.188421
15.6816	1.44283e-09	0.23544	0.439112	0.137027	0.18842
15.695	1.44284e-09	0.235437	0.439113	0.13703	0.18842
15.7084	1.44284e-09	0.235433	0.439113	0.137034	0.18842
15.7218	1.44288e-09	0.235468	0.439091	0.137031	0.18841
15.7352	1.44289e-09	0.235463	0.439088	0.137034	0.188415
15.7486	1.4429e-09	0.235457	0.439085	0.137038	0.18842
15.7621	1.4429e-09	0.235452	0.439082	0.137041	0.188425
15.7755	1.44291e-09	0.235447	0.439079	0.137044	0.18843
15.789	1.44291e-09	0.235442	0.439077	0.137047	0.188435
15.8025	1.44292e-09	0.235436	0.439074	0.137049	0.18844
15.816	1.44293e-09	0.235431	0.439071	0.137052	0.188445
15.8295	1.44293e-09	0.235426	0.439069	0.137055	0.188451
15.843	1.44294e-09	0.235356	0.439104	0.137067	0.188472
15.8565	1.44294e-09	0.235352	0.439105	0.137069	0.188473
15.87	1.44295e-09	0.235349	0.439106	0.137071	0.188474
15.8836	1.44295e-09	0.235346	0.439107	0.137072	0.188475
15.8972	1.44296e-09	0.235342	0.439108	0.137073	0.188477
15.9107	1.44296e-09	0.235339	0.439108	0.137075	0.188478
15.9243	1.44297e-09	0.235336	0.439109	0.137076	0.188479
15.9379	1.44297e-09	0.235333	0.43911	0.137078	0.18848
15.9515	1.44298e-09	0.235329	0.439111	0.137079	0.188481
15.9651	1.44303e-09	0.235374	0.439084	0.137072	0.18847
15.9788	1.44303e-09	0.235371	0.439085	0.137074	0.18847
15.9924	1.44304e-09	0.235368	0.439086	0.137076	0.18847
16.0061	1.44304e-09	0.235365	0.439087	0.137078	0.18847
16.0197	1.44305e-09	0.235362	0.439088	0.13708	0.18847
16.0334	1.44305e-09	0.235358	0.43909	0.137082	0.18847
16.0471	1.44306e-09	0.235355	0.439091	0.137084	0.18847
16.0608	1.44306e-09	0.235352	0.439092	0.137085	0.18847
16.0745	1.44307e-09	0.235349	0.439094	0.137087	0.18847
16.0882	1.44311e-09	0.235384	0.439073	0.137083	0.188461
16.102	1.44312e-09	0.235381	0.439073	0.137085	0.188461
16.1157	1.44312e-09	0.235377	0.439074	0.137087	0.188462
16.1295	1.44313e-09	0.235374	0.439074	0.137089	0.188463
16.1432	1.44313e-09	0.23537	0.439075	0.137091	0.188464
16.157	1.44314e-09	0.235367	0.439076	0.137093	0.188465
16.1708	1.44314e-09	0.235363	0.439076	0.137095	0.188466
16.1846	1.44315e-09	0.23536	0.439077	0.137097	0.188467
16.1984	1.44315e-09	0.235356	0.439078	0.137098	0.188467
16.2123	1.4432e-09	0.235402	0.43905	0.137092	0.188456
16.2261	1.44321e-09	0.235398	0.43905	0.137095	0.188457
16.24	1.44322e-09	0.235395	0.439051	0.137097	0.188458
16.2538	1.44322e-09	0.235391	0.439051	0.137099	0.188459
16.2677	1.44323e-09	0.235387	0.439051	0.137102	0.188459
16.2816	1.44323e-09	0.235384	0.439052	0.137104	0.18846
16.2955	1.44324e-09	0.23538	0.439052	0.137106	0.188461
16.3094	1.44324e-09	0.235377	0.439053	0.137108	0.188462
16.3233	1.44325e-09	0.235373	0.439053	0.13711	0.188463
16.3373	1.4433e-09	0.235408	0.439032	0.137106	0.188454
16.3512	1.4433e-09	0.235404	0.439032	0.137109	0.188455
16.3652	1.44331e-09	0.2354	0.439032	0.137112	0.188456
16.3791	1.44331e-09	0.235396	0.439032	0.137115	0.188457
16.3931	1.44332e-09	0.235393	0.439033	0.137117	0.188457
16.4071	1.44332e-09	0.235389	0.439033	0.13712	0.188458
16.4211	1.44333e-09	0.235385	0.439033	0.137122	0.188459
16.4351	1.44334e-09	0.235382	0.439034	0.137125	0.18846
16.4492	1.44334e-09	0.235378	0.439034	0.137127	0.188461
16.4632	1.44339e-09	0.235423	0.439006	0.137121	0.188449
16.4773	1.4434e-09	0.23542	0.439006	0.137124	0.188449
16.4913	1.44341e-09	0.235416	0.439007	0.137128	0.188449
16.5054	1.44341e-09	0.235412	0.439007	0.137131	0.188449
16.5195	1.44342e-09	0.235409	0.439008	0.137134	0.188449
16.5336	1.44342e-09	0.235405	0.439008	0.137137	0.18845
16.5477	1.44343e-09	0.235402	0.439009	0.13714	0.18845
16.5619	1.44344e-09	0.235398	0.43901	0.137142	0.18845
16.576	1.44344e-09	0.235395	0.43901	0.137145	0.18845
16.5901	1.44349e-09	0.235434	0.438985	0.137141	0.188439
16.6043	1.4435e-09	0.235431	0.438986	0.137144	0.188439
16.6185	1.4435e-09	0.235427	0.438986	0.137148	0.188438
16.6327	1.44351e-09	0.235424	0.438987	0.137151	0.188438
16.6469	1.44351e-09	0.23542	0.438988	0.137155	0.188438
16.6611	1.44352e-09	0.235416	0.438988	0.137158	0.188437
16.6753	1.44353e-09	0.235413	0.438989	0.137161	0.188437
16.6895	1.44353e-09	0.235409	0.43899	0.137164	0.188437
16.7038	1.44354e-09	0.235406	0.438991	0.137167	0.188436
16.7181	1.44358e-09	0.235439	0.438969	0.137165	0.188427
16.7323	1.44359e-09	0.235436	0.43897	0.137169	0.188426
16.7466	1.44359e-09	0.235432	0.43897	0.137172	0.188426
16.7609	1.4436e-09	0.235428	0.438971	0.137176	0.188425
16.7752	1.4436e-09	0.235424	0.438971	0.13718	0.188425
16.7895	1.44361e-09	0.235421	0.438972	0.137183	0.188424
16.8039	1.44362e-09	0.235417	0.438972	0.137187	0.188424
16.8182	1.44362e-09	0.235413	0.438973	0.13719	0.188423
16.8326	1.44363e-09	0.23541	0.438974	0.137194	0.188423
16.847	1.44367e-09	0.235444	0.438952	0.137191	0.188413
16.8613	1.44368e-09	0.23544	0.438952	0.137195	0.188412
16.8757	1.44368e-09	0.235437	0.438952	0.137199	0.188412
16.8901	1.44369e-09	0.235433	0.438953	0.137204	0.188411
16.9046	1.4437e-09	0.235429	0.438953	0.137207	0.188411
16.919	1.4437e-09	0.235425	0.438953	0.137211	0.18841
16.9334	1.44371e-09	0.235421	0.438954	0.137215	0.18841
16.9479	1.44372e-09	0.235418	0.438954	0.137219	0.188409
16.9624	1.44372e-09	0.235414	0.438955	0.137222	0.188409
16.9768	1.44376e-09	0.235439	0.438938	0.137222	0.188401
16.9913	1.44377e-09	0.235433	0.438935	0.137225	0.188407
17.0058	1.44377e-09	0.235427	0.438931	0.137229	0.188413
17.0204	1.44378e-09	0.235422	0.438928	0.137232	0.188419
17.0349	1.44379e-09	0.235416	0.438924	0.137235	0.188425
17.0494	1.44379e-09	0.23541	0.438921	0.137238	0.188431
17.064	1.4438e-09	0.235404	0.438918	0.137241	0.188437
17.0786	1.44381e-09	0.235398	0.438915	0.137244	0.188443
17.0931	1.44381e-09	0.235393	0.438912	0.137247	0.188449
17.1077	1.44384e-09	0.235346	0.438933	0.137256	0.188465
17.1223	1.44384e-09	0.235342	0.438934	0.137257	0.188466
17.137	1.44385e-09	0.235338	0.438935	0.137259	0.188467
17.1516	1.44385e-09	0.235335	0.438936	0.137261	0.188468
17.1662	1.44386e-09	0.235331	0.438937	0.137263	0.188469
17.1809	1.44387e-09	0.235328	0.438938	0.137265	0.18847
17.1956	1.44387e-09	0.235324	0.438939	0.137266	0.188471
17.2102	1.44388e-09	0.235321	0.43894	0.137268	0.188472
17.2249	1.44388e-09	0.235317	0.438941	0.137269	0.188473
17.2396	1.44393e-09	0.235363	0.438913	0.137263	0.188461
17.2544	1.44394e-09	0.235359	0.438914	0.137265	0.188462
17.2691	1.44395e-09	0.235355	0.438915	0.137267	0.188463
17.2838	1.44395e-09	0.235352	0.438916	0.137269	0.188464
17.2986	1.44396e-09	0.235348	0.438916	0.137271	0.188465
17.3134	1.44396e-09	0.235344	0.438917	0.137273	0.188465
17.3281	1.44397e-09	0.235341	0.438918	0.137275	0.188466
17.3429	1.44397e-09	0.235337	0.438919	0.137277	0.188467
17.3577	1.44398e-09	0.235334	0.43892	0.137279	0.188468
17.3726	1.44403e-09	0.235379	0.438892	0.137272	0.188457
17.3874	1.44404e-09	0.235375	0.438893	0.137275	0.188457
17.4022	1.44404e-09	0.235371	0.438893	0.137277	0.188458
17.4171	1.44405e-09	0.235368	0.438894	0.13728	0.188459
17.432	1.44406e-09	0.235364	0.438895	0.137282	0.188459
17.4468	1.44406e-09	0.23536	0.438895	0.137284	0.18846
17.4617	1.44407e-09	0.235356	0.438896	0.137287	0.188461
17.4766	1.44407e-09	0.235353	0.438897	0.137289	0.188462
17.4916	1.44408e-09	0.235349	0.438898	0.137291	0.188462
17.5065	1.44413e-09	0.235385	0.438875	0.137287	0.188453
17.5214	1.44413e-09	0.235381	0.438876	0.13729	0.188454
17.5364	1.44414e-09	0.235377	0.438876	0.137292	0.188454
17.5514	1.44415e-09	0.235373	0.438876	0.137295	0.188455
17.5664	1.44415e-09	0.235369	0.438877	0.137298	0.188456
17.5814	1.44416e-09	0.235366	0.438878	0.1373	0.188456
17.5964	1.44416e-09	0.235362	0.438878	0.137303	0.188457
17.6114	1.44417e-09	0.235358	0.438879	0.137305	0.188458
17.6264	1.44418e-09	0.235354	0.438879	0.137308	0.188458
17.6415	1.44423e-09	0.235399	0.438851	0.137302	0.188447
17.6565	1.44424e-09	0.235395	0.438852	0.137306	0.188447
17.6716	1.44424e-09	0.235392	0.438853	0.137309	0.188446
17.6867	1.44425e-09	0.235388	0.438854	0.137312	0.188446
17.7018	1.44426e-09	0.235384	0.438854	0.137316	0.188446
17.7169	1.44426e-09	0.23538	0.438855	0.137319	0.188446
17.732	1.44427e-09	0.235377	0.438856	0.137322	0.188445
17.7472	1.44427e-09	0.235373	0.438857	0.137325	0.188445
17.7623	1.44428e-09	0.235369	0.438858	0.137327	0.188445
17.7775	1.44432e-09	0.235406	0.438835	0.137324	0.188435
17.7927	1.44433e-09	0.235402	0.438836	0.137328	0.188434
17.8079	1.44434e-09	0.235399	0.438836	0.137331	0.188434
17.8231	1.44434e-09	0.235395	0.438837	0.137335	0.188433
17.8383	1.44435e-09	0.235391	0.438838	0.137338	0.188433
17.8535	1.44436e-09	0.235387	0.438838	0.137342	0.188433
17.8687	1.44436e-09	0.235383	0.438839	0.137345	0.188432
17.884	1.44437e-09	0.23538	0.43884	0.137348	0.188432
17.8993	1.44438e-09	0.235376	0.438841	0.137352	0.188432
17.9145	1.44442e-09	0.235413	0.438818	0.137348	0.188421
17.9298	1.44443e-09	0.235409	0.438818	0.137353	0.188421
17.9451	1.44443e-09	0.235405	0.438818	0.137357	0.18842
17.9605	1.44444e-09	0.235401	0.438819	0.137361	0.18842
17.9758	1.44445e-09	0.235397	0.438819	0.137364	0.18842
17.9912	1.44446e-09	0.235393	0.43882	0.137368	0.188419
18.0065	1.44446e-09	0.235389	0.438821	0.137372	0.188419
18.0219	1.44447e-09	0.235385	0.438821	0.137375	0.188418
18.0373	1.44448e-09	0.235381	0.438822	0.137379	0.188418
18.0527	1.44452e-09	0.235419	0.438798	0.137376	0.188407
18.0681	1.44453e-09	0.235413	0.438796	0.13738	0.188412
18.0835	1.44453e-09	0.235407	0.438793	0.137383	0.188416
18.0989	1.44454e-09	0.235402	0.438791	0.137387	0.188421
18.1144	1.44455e-09	0.235396	0.438788	0.13739	0.188426
18.1299	1.44456e-09	0.235391	0.438786	0.137393	0.18843
18.1453	1.44456e-09	0.235385	0.438784	0.137396	0.188435
18.1608	1.44457e-09	0.23538	0.438781	0.137399	0.18844
18.1763	1.44458e-09	0.235374	0.438779	0.137402	0.188444
18.1919	1.44458e-09	0.235305	0.438815	0.137415	0.188465
18.2074	1.44459e-09	0.235301	0.438816	0.137416	0.188466
18.2229	1.44459e-09	0.235298	0.438817	0.137418	0.188467
18.2385	1.4446e-09	0.235294	0.438819	0.13742	0.188468
18.2541	1.4446e-09	0.23529	0.43882	0.137421	0.188469
18.2696	1.44461e-09	0.235287	0.438821	0.137423	0.18847
18.2852	1.44461e-09	0.235283	0.438822	0.137424	0.188471
18.3009	1.44462e-09	0.23528	0.438824	0.137425	0.188471
18.3165	1.44463e-09	0.235276	0.438825	0.137427	0.188472
18.3321	1.44468e-09	0.235322	0.438798	0.13742	0.188461
18.3478	1.44469e-09	0.235318	0.438799	0.137422	0.188461
18.3634	1.44469e-09	0.235315	0.4388	0.137424	0.188462
18.3791	1.4447e-09	0.235311	0.438801	0.137426	0.188463
18.3948	1.4447e-09	0.235307	0.438802	0.137427	0.188464
18.4105	1.44471e-09	0.235303	0.438803	0.137429	0.188464
18.4262	1.44471e-09	0.2353	0.438804	0.137431	0.188465
18.4419	1.44472e-09	0.235296	0.438805	0.137433	0.188466
18.4577	1.44473e-09	0.235292	0.438807	0.137434	0.188467
18.4735	1.44478e-09	0.235338	0.438779	0.137428	0.188455
18.4892	1.44479e-09	0.235334	0.43878	0.13743	0.188456
18.505	1.44479e-09	0.23533	0.438781	0.137433	0.188457
18.5208	1.4448e-09	0.235326	0.438782	0.137435	0.188457
18.5366	1.4448e-09	0.235322	0.438783	0.137437	0.188458
18.5524	1.44481e-09	0.235318	0.438784	0.137439	0.188458
18.5683	1.44482e-09	0.235314	0.438785	0.137441	0.188459
18.5841	1.44482e-09	0.235311	0.438786	0.137443	0.18846
18.6	1.44483e-09	0.235307	0.438787	0.137445	0.188461
18.6159	1.44488e-09	0.235354	0.438759	0.137439	0.188449
18.6318	1.44489e-09	0.235349	0.438759	0.137442	0.18845
18.6477	1.44489e-09	0.235345	0.438759	0.137444	0.188452
18.6636	1.4449e-09	0.235341	0.438759	0.137447	0.188453
18.6795	1.44491e-09	0.235337	0.43876	0.137449	0.188455
18.6955	1.44491e-09	0.235332	0.43876	0.137451	0.188456
18.7114	1.44492e-09	0.235328	0.43876	0.137453	0.188458
18.7274	1.44493e-09	0.235324	0.438761	0.137456	0.18846
18.7434	1.44493e-09	0.23532	0.438761	0.137458	0.188461
18.7594	1.445e-09	0.235375	0.438727	0.13745	0.188448
18.7754	1.445e-09	0.235371	0.438727	0.137453	0.188448
18.7915	1.44501e-09	0.235367	0.438728	0.137456	0.188449
18.8075	1.44502e-09	0.235363	0.438729	0.13746	0.188449
18.8236	1.44502e-09	0.235359	0.438729	0.137463	0.188449
18.8396	1.44503e-09	0.235355	0.43873	0.137465	0.18845
18.8557	1.44504e-09	0.235351	0.438731	0.137468	0.18845
18.8718	1.44504e-09	0.235347	0.438732	0.137471	0.18845
18.8879	1.44505e-09	0.235343	0.438733	0.137474	0.188451
18.904	1.4451e-09	0.235388	0.438704	0.137468	0.188439
18.9202	1.44511e-09	0.235384	0.438705	0.137472	0.188439
18.9363	1.44512e-09	0.23538	0.438706	0.137476	0.188438
18.9525	1.44513e-09	0.235376	0.438707	0.137479	0.188438
18.9687	1.44513e-09	0.235372	0.438707	0.137483	0.188438
18.9849	1.44514e-09	0.235368	0.438708	0.137486	0.188438
19.0011	1.44515e-09	0.235364	0.438709	0.137489	0.188437
19.0173	1.44515e-09	0.23536	0.43871	0.137492	0.188437
19.0335	1.44516e-09	0.235356	0.438711	0.137495	0.188437
19.0498	1.44521e-09	0.235396	0.438687	0.137492	0.188426
19.0661	1.44521e-09	0.235391	0.438687	0.137496	0.188425
19.0823	1.44522e-09	0.235387	0.438688	0.1375	0.188425
19.0986	1.44523e-09	0.235383	0.438688	0.137504	0.188425
19.1149	1.44523e-09	0.235379	0.438689	0.137508	0.188424
19.1313	1.44524e-09	0.235375	0.43869	0.137511	0.188424
19.1476	1.44525e-09	0.235371	0.43869	0.137515	0.188424
19.1639	1.44526e-09	0.235367	0.438691	0.137519	0.188424
19.1803	1.44526e-09	0.235363	0.438692	0.137522	0.188423
19.1967	1.44531e-09	0.235402	0.438667	0.137519	0.188412
19.2131	1.44532e-09	0.235397	0.438668	0.137523	0.188412
19.2295	1.44533e-09	0.235393	0.438668	0.137528	0.188411
19.2459	1.44533e-09	0.235389	0.438669	0.137532	0.188411
19.2623	1.44534e-09	0.235384	0.438669	0.137536	0.18841
19.2788	1.44535e-09	0.23538	0.43867	0.13754	0.18841
19.2952	1.44535e-09	0.235376	0.43867	0.137544	0.188409
19.3117	1.44536e-09	0.235372	0.438671	0.137548	0.188409
19.3282	1.44537e-09	0.235368	0.438672	0.137552	0.188409
19.3447	1.44541e-09	0.235398	0.438652	0.137551	0.1884
19.3612	1.44542e-09	0.235392	0.438649	0.137555	0.188404
19.3777	1.44543e-09	0.235386	0.438646	0.137559	0.188409
19.3943	1.44543e-09	0.23538	0.438644	0.137563	0.188414
19.4108	1.44544e-09	0.235374	0.438641	0.137567	0.188419
19.4274	1.44545e-09	0.235368	0.438639	0.13757	0.188423
19.444	1.44546e-09	0.235362	0.438636	0.137574	0.188428
19.4606	1.44546e-09	0.235356	0.438634	0.137577	0.188433
19.4772	1.44547e-09	0.23535	0.438631	0.13758	0.188438
19.4938	1.44549e-09	0.235296	0.438658	0.13759	0.188456
19.5105	1.44549e-09	0.235292	0.438659	0.137593	0.188456
19.5271	1.4455e-09	0.235288	0.438661	0.137594	0.188457
19.5438	1.44551e-09	0.235284	0.438662	0.137596	0.188457
19.5605	1.44551e-09	0.23528	0.438664	0.137598	0.188458
19.5772	1.44552e-09	0.235276	0.438665	0.1376	0.188459
19.5939	1.44553e-09	0.235273	0.438666	0.137602	0.188459
19.6106	1.44553e-09	0.235269	0.438668	0.137603	0.18846
19.6274	1.44554e-09	0.235265	0.438669	0.137605	0.188461
19.6441	1.44559e-09	0.235311	0.438642	0.137598	0.188449
19.6609	1.4456e-09	0.235306	0.438642	0.137601	0.18845
19.6777	1.4456e-09	0.235302	0.438643	0.137603	0.188452
19.6945	1.44561e-09	0.235298	0.438644	0.137605	0.188453
19.7113	1.44562e-09	0.235294	0.438644	0.137607	0.188455
19.7281	1.44562e-09	0.235289	0.438645	0.137609	0.188457
19.745	1.44563e-09	0.235285	0.438646	0.137611	0.188458
19.7618	1.44564e-09	0.235281	0.438647	0.137613	0.18846
19.7787	1.44564e-09	0.235277	0.438648	0.137614	0.188461
19.7956	1.44571e-09	0.235333	0.438613	0.137606	0.188448
19.8125	1.44572e-09	0.235329	0.438614	0.137609	0.188448
19.8294	1.44572e-09	0.235325	0.438615	0.137612	0.188449
19.8463	1.44573e-09	0.23532	0.438616	0.137615	0.188449
19.8633	1.44574e-09	0.235316	0.438617	0.137617	0.188449
19.8802	1.44574e-09	0.235312	0.438618	0.13762	0.18845
19.8972	1.44575e-09	0.235308	0.438619	0.137622	0.18845
19.9142	1.44576e-09	0.235304	0.43862	0.137625	0.188451
19.9312	1.44576e-09	0.2353	0.438622	0.137627	0.188451
19.9482	1.44582e-09	0.235346	0.438593	0.137621	0.188439
19.9652	1.44582e-09	0.235342	0.438593	0.137625	0.18844
19.9823	1.44583e-09	0.235337	0.438593	0.137628	0.188442
19.9993	1.44584e-09	0.235333	0.438594	0.137631	0.188443
20.0164	1.44584e-09	0.235328	0.438594	0.137633	0.188444
20.0335	1.44585e-09	0.235324	0.438594	0.137636	0.188446
20.0506	1.44586e-09	0.235319	0.438595	0.137639	0.188447
20.0677	1.44587e-09	0.235315	0.438595	0.137641	0.188448
20.0848	1.44587e-09	0.23531	0.438596	0.137644	0.18845
20.102	1.44594e-09	0.235366	0.438561	0.137637	0.188436
20.1192	1.44595e-09	0.235362	0.438562	0.137641	0.188436
20.1363	1.44595e-09	0.235358	0.438563	0.137644	0.188436
20.1535	1.44596e-09	0.235353	0.438563	0.137648	0.188435
20.1707	1.44597e-09	0.235349	0.438564	0.137652	0.188435
20.188	1.44598e-09	0.235345	0.438565	0.137655	0.188435
20.2052	1.44598e-09	0.235341	0.438566	0.137658	0.188435
20.2224	1.44599e-09	0.235336	0.438567	0.137662	0.188435
20.2397	1.446e-09	0.235332	0.438568	0.137665	0.188435
20.257	1.44605e-09	0.235374	0.438542	0.137661	0.188423
20.2743	1.44605e-09	0.235369	0.438543	0.137665	0.188423
20.2916	1.44606e-09	0.235365	0.438544	0.137669	0.188422
20.3089	1.44607e-09	0.23536	0.438544	0.137673	0.188422
20.3262	1.44608e-09	0.235356	0.438545	0.137677	0.188422
20.3436	1.44608e-09	0.235352	0.438546	0.137681	0.188421
20.361	1.44609e-09	0.235347	0.438547	0.137685	0.188421
20.3784	1.4461e-09	0.235343	0.438548	0.137688	0.188421
20.3958	1.44611e-09	0.235339	0.438549	0.137692	0.188421
20.4132	1.44616e-09	0.23538	0.438522	0.137689	0.188409
20.4306	1.44617e-09	0.235376	0.438523	0.137693	0.188408
20.448	1.44617e-09	0.235371	0.438523	0.137698	0.188408
20.4655	1.44618e-09	0.235367	0.438524	0.137703	0.188407
20.483	1.44619e-09	0.235362	0.438524	0.137707	0.188406
20.5005	1.4462e-09	0.235358	0.438525	0.137711	0.188406
20.518	1.4462e-09	0.235353	0.438526	0.137716	0.188405
20.5355	1.44621e-09	0.235349	0.438527	0.13772	0.188405
20.553	1.44622e-09	0.235345	0.438528	0.137724	0.188404
20.5705	1.44627e-09	0.235383	0.438503	0.137721	0.188393
20.5881	1.44628e-09	0.235377	0.4385	0.137725	0.188398
20.6057	1.44628e-09	0.23537	0.438497	0.13773	0.188403
20.6233	1.44629e-09	0.235364	0.438494	0.137734	0.188408
20.6409	1.4463e-09	0.235358	0.438491	0.137737	0.188413
20.6585	1.44631e-09	0.235351	0.438489	0.137741	0.188419
20.6761	1.44632e-09	0.235345	0.438486	0.137745	0.188424
20.6938	1.44632e-09	0.235339	0.438484	0.137748	0.188429
20.7115	1.44633e-09	0.235333	0.438481	0.137752	0.188435
20.7291	1.44635e-09	0.235276	0.438509	0.137762	0.188453
20.7468	1.44636e-09	0.235272	0.43851	0.137764	0.188453
20.7646	1.44636e-09	0.235268	0.438512	0.137767	0.188454
20.7823	1.44637e-09	0.235264	0.438513	0.137769	0.188454
20.8	1.44638e-09	0.23526	0.438515	0.137771	0.188455
20.8178	1.44638e-09	0.235256	0.438516	0.137773	0.188455
20.8356	1.44639e-09	0.235252	0.438518	0.137775	0.188456
20.8533	1.4464e-09	0.235248	0.43852	0.137776	0.188456
20.8711	1.4464e-09	0.235244	0.438521	0.137778	0.188457
20.889	1.44646e-09	0.23529	0.438493	0.137772	0.188444
20.9068	1.44647e-09	0.235286	0.438494	0.137774	0.188446
20.9247	1.44647e-09	0.235281	0.438495	0.137777	0.188447
20.9425	1.44648e-09	0.235277	0.438495	0.137779	0.188448
20.9604	1.44649e-09	0.235272	0.438496	0.137782	0.18845
20.9783	1.44649e-09	0.235268	0.438497	0.137784	0.188451
20.9962	1.4465e-09	0.235263	0.438498	0.137786	0.188453
21.0141	1.44651e-09	0.235259	0.438499	0.137788	0.188454
21.0321	1.44651e-09	0.235254	0.4385	0.13779	0.188456
21.05	1.44658e-09	0.235311	0.438465	0.137782	0.188442
21.068	1.44659e-09	0.235307	0.438466	0.137785	0.188443
21.086	1.44659e-09	0.235302	0.438466	0.137788	0.188444
21.104	1.4466e-09	0.235297	0.438467	0.137791	0.188445
21.122	1.44661e-09	0.235293	0.438467	0.137794	0.188446
21.14	1.44662e-09	0.235288	0.438468	0.137796	0.188448
21.1581	1.44662e-09	0.235283	0.438469	0.137799	0.188449
21.1761	1.44663e-09	0.235279	0.43847	0.137801	0.18845
21.1942	1.44664e-09	0.235274	0.43847	0.137804	0.188452
21.2123	1.4467e-09	0.23533	0.438436	0.137796	0.188438
21.2304	1.44671e-09	0.235325	0.438436	0.1378	0.188438
21.2486	1.44672e-09	0.235321	0.438437	0.137804	0.188439
21.2667	1.44673e-09	0.235316	0.438438	0.137807	0.188439
21.2848	1.44673e-09	0.235311	0.438438	0.13781	0.18844
21.303	1.44674e-09	0.235307	0.438439	0.137814	0.18844
21.3212	1.44675e-09	0.235302	0.43844	0.137817	0.188441
21.3394	1.44676e-09	0.235298	0.438441	0.13782	0.188441
21.3576	1.44676e-09	0.235293	0.438442	0.137823	0.188442
21.3759	1.44682e-09	0.235344	0.438411	0.137817	0.188429
21.3941	1.44683e-09	0.235339	0.438411	0.137821	0.188428
21.4124	1.44684e-09	0.235334	0.438412	0.137825	0.188428
21.4307	1.44685e-09	0.23533	0.438413	0.137829	0.188428
21.449	1.44686e-09	0.235325	0.438414	0.137833	0.188427
21.4673	1.44686e-09	0.235321	0.438415	0.137837	0.188427
21.4856	1.44687e-09	0.235316	0.438416	0.137841	0.188427
21.5039	1.44688e-09	0.235312	0.438417	0.137844	0.188427
21.5223	1.44689e-09	0.235307	0.438418	0.137848	0.188427
21.5407	1.44694e-09	0.235352	0.43839	0.137844	0.188414
21.5591	1.44695e-09	0.235347	0.438391	0.137849	0.188413
21.5775	1.44696e-09	0.235343	0.438391	0.137853	0.188413
21.5959	1.44696e-09	0.235338	0.438392	0.137858	0.188412
21.6143	1.44697e-09	0.235333	0.438393	0.137862	0.188412
21.6328	1.44698e-09	0.235329	0.438394	0.137867	0.188411
21.6512	1.44699e-09	0.235324	0.438395	0.137871	0.188411
21.6697	1.447e-09	0.235319	0.438396	0.137875	0.18841
21.6882	1.447e-09	0.235315	0.438397	0.137879	0.18841
21.7067	1.44706e-09	0.235356	0.438371	0.137876	0.188398
21.7253	1.44706e-09	0.235351	0.438371	0.137881	0.188397
21.7438	1.44707e-09	0.235346	0.438371	0.137886	0.188396
21.7624	1.44708e-09	0.235341	0.438372	0.137892	0.188396
21.781	1.44709e-09	0.235336	0.438372	0.137896	0.188395
21.7996	1.4471e-09	0.235332	0.438373	0.137901	0.188394
21.8182	1.44711e-09	0.235327	0.438374	0.137906	0.188394
21.8368	1.44711e-09	0.235322	0.438374	0.13791	0.188393
21.8554	1.44712e-09	0.235317	0.438375	0.137915	0.188393
21.8741	1.44717e-09	0.235359	0.438348	0.137912	0.18838
21.8928	1.44718e-09	0.235352	0.438344	0.137917	0.188386
21.9115	1.44719e-09	0.235345	0.438341	0.137922	0.188392
21.9302	1.4472e-09	0.235338	0.438337	0.137926	0.188399
21.9489	1.44721e-09	0.235331	0.438334	0.13793	0.188405
21.9676	1.44722e-09	0.235324	0.43833	0.137934	0.188411
21.9864	1.44723e-09	0.235317	0.438327	0.137938	0.188418
22.0052	1.44724e-09	0.23531	0.438324	0.137942	0.188424
22.024	1.44724e-09	0.235303	0.438321	0.137946	0.18843
22.0428	1.44728e-09	0.235269	0.438335	0.137952	0.188444
22.0616	1.44729e-09	0.235264	0.438335	0.137955	0.188445
22.0804	1.4473e-09	0.23526	0.438336	0.137958	0.188446
22.0993	1.44731e-09	0.235255	0.438338	0.13796	0.188447
22.1181	1.44731e-09	0.23525	0.438339	0.137963	0.188449
22.137	1.44732e-09	0.235246	0.43834	0.137965	0.18845
22.1559	1.44733e-09	0.235241	0.438341	0.137967	0.188451
22.1748	1.44733e-09	0.235237	0.438342	0.137969	0.188452
22.1938	1.44734e-09	0.235232	0.438344	0.137971	0.188453
22.2127	1.44741e-09	0.235289	0.438309	0.137963	0.188439
22.2317	1.44742e-09	0.235284	0.43831	0.137967	0.18844
22.2506	1.44742e-09	0.235279	0.43831	0.13797	0.188441
22.2696	1.44743e-09	0.235274	0.438311	0.137973	0.188442
22.2887	1.44744e-09	0.235269	0.438312	0.137975	0.188443
22.3077	1.44745e-09	0.235264	0.438313	0.137978	0.188445
22.3267	1.44745e-09	0.23526	0.438314	0.137981	0.188446
22.3458	1.44746e-09	0.235255	0.438315	0.137983	0.188447
22.3649	1.44747e-09	0.23525	0.438316	0.137986	0.188448
22.384	1.44754e-09	0.235317	0.438275	0.137977	0.188431
22.4031	1.44755e-09	0.235312	0.438276	0.137981	0.188432
22.4222	1.44756e-09	0.235307	0.438277	0.137984	0.188432
22.4413	1.44757e-09	0.235302	0.438278	0.137988	0.188432
22.4605	1.44757e-09	0.235297	0.438279	0.137991	0.188433
22.4797	1.44758e-09	0.235293	0.43828	0.137995	0.188433
22.4989	1.44759e-09	0.235288	0.438281	0.137998	0.188434
22.5181	1.4476e-09	0.235283	0.438282	0.138001	0.188434
22.5373	1.4476e-09	0.235278	0.438283	0.138004	0.188435
22.5565	1.44767e-09	0.235329	0.438251	0.137998	0.188421
22.5758	1.44768e-09	0.235324	0.438252	0.138003	0.188421
22.5951	1.44768e-09	0.23532	0.438253	0.138007	0.18842
22.6144	1.44769e-09	0.235315	0.438254	0.138011	0.18842
22.6337	1.4477e-09	0.23531	0.438255	0.138015	0.188419
22.653	1.44771e-09	0.235305	0.438256	0.138019	0.188419
22.6723	1.44772e-09	0.235301	0.438257	0.138023	0.188419
22.6917	1.44772e-09	0.235296	0.438259	0.138027	0.188419
22.7111	1.44773e-09	0.235291	0.43826	0.13803	0.188418
22.7305	1.44779e-09	0.235335	0.438232	0.138027	0.188406
22.7499	1.44779e-09	0.23533	0.438233	0.138032	0.188405
22.7693	1.4478e-09	0.235325	0.438234	0.138037	0.188405
22.7887	1.44781e-09	0.23532	0.438234	0.138042	0.188404
22.8082	1.44782e-09	0.235315	0.438235	0.138046	0.188404
22.8276	1.44783e-09	0.23531	0.438236	0.138051	0.188403
22.8471	1.44784e-09	0.235305	0.438237	0.138055	0.188403
22.8666	1.44785e-09	0.235301	0.438238	0.138059	0.188402
22.8862	1.44785e-09	0.235296	0.438239	0.138063	0.188402
22.9057	1.44791e-09	0.23534	0.438211	0.13806	0.188389
22.9253	1.44792e-09	0.235333	0.438209	0.138065	0.188393
22.9448	1.44793e-09	0.235327	0.438206	0.138069	0.188398
22.9644	1.44794e-09	0.23532	0.438204	0.138074	0.188402
22.984	1.44794e-09	0.235314	0.438202	0.138078	0.188407
23.0037	1.44795e-09	0.235307	0.4382	0.138082	0.188411
23.0233	1.44796e-09	0.235301	0.438198	0.138086	0.188416
23.0429	1.44797e-09	0.235294	0.438196	0.13809	0.188421
23.0626	1.44798e-09	0.235288	0.438194	0.138093	0.188425
23.0823	1.44799e-09	0.235228	0.438224	0.138105	0.188444
23.102	1.448e-09	0.235223	0.438225	0.138107	0.188445
23.1217	1.44801e-09	0.235218	0.438227	0.138109	0.188446
23.1415	1.44802e-09	0.235214	0.438228	0.138111	0.188447
23.1612	1.44802e-09	0.235209	0.43823	0.138113	0.188448
23.181	1.44803e-09	0.235204	0.438231	0.138115	0.18845
23.2008	1.44804e-09	0.2352	0.438233	0.138117	0.188451
23.2206	1.44804e-09	0.235195	0.438234	0.138118	0.188452
23.2404	1.44805e-09	0.235191	0.438236	0.13812	0.188454
23.2603	1.44812e-09	0.235247	0.438202	0.138112	0.188439
23.2801	1.44813e-09	0.235242	0.438203	0.138114	0.18844
23.3	1.44813e-09	0.235237	0.438204	0.138117	0.188441
23.3199	1.44814e-09	0.235232	0.438205	0.13812	0.188443
23.3398	1.44815e-09	0.235228	0.438207	0.138122	0.188444
23.3597	1.44816e-09	0.235223	0.438208	0.138125	0.188445
23.3797	1.44816e-09	0.235218	0.438209	0.138127	0.188446
23.3996	1.44817e-09	0.235213	0.438211	0.138129	0.188447
23.4196	1.44818e-09	0.235209	0.438212	0.138131	0.188448
23.4396	1.44825e-09	0.235276	0.438172	0.138121	0.188431
23.4596	1.44826e-09	0.235271	0.438172	0.138125	0.188432
23.4796	1.44827e-09	0.235265	0.438173	0.138128	0.188433
23.4997	1.44828e-09	0.23526	0.438174	0.138131	0.188434
23.5198	1.44829e-09	0.235255	0.438175	0.138134	0.188435
23.5398	1.44829e-09	0.235251	0.438176	0.138137	0.188436
23.5599	1.4483e-09	0.235246	0.438178	0.13814	0.188437
23.58	1.44831e-09	0.235241	0.438179	0.138142	0.188438
23.6002	1.44832e-09	0.235236	0.43818	0.138145	0.188439
23.6203	1.44839e-09	0.235293	0.438145	0.138138	0.188424
23.6405	1.44839e-09	0.235288	0.438145	0.138142	0.188425
23.6607	1.4484e-09	0.235282	0.438146	0.138146	0.188426
23.6809	1.44841e-09	0.235277	0.438147	0.138149	0.188427
23.7011	1.44842e-09	0.235272	0.438148	0.138153	0.188428
23.7213	1.44843e-09	0.235267	0.438148	0.138156	0.188428
23.7416	1.44843e-09	0.235262	0.438149	0.13816	0.188429
23.7618	1.44844e-09	0.235257	0.43815	0.138163	0.18843
23.7821	1.44845e-09	0.235252	0.438151	0.138166	0.188431
23.8024	1.44852e-09	0.235308	0.438116	0.138159	0.188416
23.8228	1.44853e-09	0.235303	0.438117	0.138164	0.188416
23.8431	1.44854e-09	0.235298	0.438117	0.138169	0.188416
23.8635	1.44855e-09	0.235293	0.438118	0.138173	0.188416
23.8838	1.44856e-09	0.235288	0.438119	0.138178	0.188416
23.9042	1.44856e-09	0.235283	0.43812	0.138182	0.188416
23.9246	1.44857e-09	0.235278	0.438121	0.138186	0.188415
23.9451	1.44858e-09	0.235273	0.438122	0.13819	0.188415
23.9655	1.44859e-09	0.235268	0.438124	0.138193	0.188415
23.986	1.44865e-09	0.235316	0.438093	0.138189	0.188402
24.0064	1.44866e-09	0.235311	0.438094	0.138195	0.188401
24.0269	1.44867e-09	0.235305	0.438094	0.1382	0.188401
24.0474	1.44868e-09	0.2353	0.438095	0.138205	0.1884
24.068	1.44869e-09	0.235295	0.438096	0.13821	0.1884
24.0885	1.44869e-09	0.23529	0.438097	0.138215	0.188399
24.1091	1.4487e-09	0.235285	0.438097	0.138219	0.188399
24.1297	1.44871e-09	0.23528	0.438099	0.138224	0.188398
24.1503	1.44872e-09	0.235274	0.4381	0.138228	0.188398
24.1709	1.44878e-09	0.235321	0.43807	0.138225	0.188384
24.1915	1.44879e-09	0.235314	0.438068	0.13823	0.188388
24.2122	1.4488e-09	0.235307	0.438065	0.138235	0.188392
24.2328	1.44881e-09	0.2353	0.438063	0.13824	0.188396
24.2535	1.44882e-09	0.235294	0.438061	0.138245	0.1884
24.2742	1.44883e-09	0.235287	0.438059	0.138249	0.188404
24.295	1.44884e-09	0.23528	0.438057	0.138254	0.188409
24.3157	1.44884e-09	0.235274	0.438056	0.138258	0.188413
24.3365	1.44885e-09	0.235267	0.438054	0.138262	0.188417
24.3572	1.44887e-09	0.235215	0.43808	0.138272	0.188433
24.378	1.44888e-09	0.23521	0.438081	0.138275	0.188435
24.3989	1.44889e-09	0.235205	0.438082	0.138277	0.188437
24.4197	1.4489e-09	0.235199	0.438083	0.138279	0.188439
24.4405	1.4489e-09	0.235194	0.438084	0.138281	0.188441
24.4614	1.44891e-09	0.235189	0.438085	0.138283	0.188443
24.4823	1.44892e-09	0.235184	0.438086	0.138285	0.188445
24.5032	1.44893e-09	0.235179	0.438087	0.138287	0.188447
24.5241	1.44893e-09	0.235174	0.438088	0.138288	0.188449
24.545	1.44902e-09	0.235241	0.438047	0.138278	0.188433
24.566	1.44902e-09	0.235236	0.438048	0.138282	0.188434
24.587	1.44903e-09	0.235231	0.438049	0.138285	0.188435
24.608	1.44904e-09	0.235226	0.438051	0.138288	0.188436
24.629	1.44905e-09	0.235221	0.438052	0.138291	0.188437
24.65	1.44906e-09	0.235216	0.438053	0.138293	0.188437
24.671	1.44906e-09	0.235211	0.438055	0.138296	0.188438
24.6921	1.44907e-09	0.235206	0.438056	0.138299	0.188439
24.7132	1.44908e-09	0.235201	0.438058	0.138301	0.18844
24.7343	1.44915e-09	0.235258	0.438023	0.138294	0.188425
24.7554	1.44916e-09	0.235253	0.438024	0.138297	0.188426
24.7765	1.44917e-09	0.235248	0.438025	0.138301	0.188427
24.7977	1.44918e-09	0.235242	0.438026	0.138305	0.188427
24.8189	1.44918e-09	0.235237	0.438027	0.138308	0.188428
24.84	1.44919e-09	0.235232	0.438028	0.138312	0.188428
24.8612	1.4492e-09	0.235227	0.438029	0.138315	0.188429
24.8825	1.44921e-09	0.235222	0.438031	0.138318	0.18843
24.9037	1.44922e-09	0.235217	0.438032	0.138321	0.188431
24.925	1.44929e-09	0.235274	0.437996	0.138314	0.188415
24.9463	1.4493e-09	0.235268	0.437997	0.138319	0.188416
24.9676	1.4493e-09	0.235263	0.437997	0.138323	0.188417
24.9889	1.44931e-09	0.235257	0.437998	0.138327	0.188417
25.0102	1.44932e-09	0.235252	0.437999	0.138332	0.188418
25.0316	1.44933e-09	0.235246	0.437999	0.138335	0.188419
25.0529	1.44934e-09	0.235241	0.438	0.138339	0.18842
25.0743	1.44935e-09	0.235235	0.438001	0.138343	0.188421
25.0957	1.44936e-09	0.23523	0.438002	0.138346	0.188422
25.1171	1.44944e-09	0.235298	0.43796	0.138338	0.188404
25.1386	1.44945e-09	0.235292	0.43796	0.138344	0.188403
25.1601	1.44945e-09	0.235287	0.437961	0.138349	0.188403
25.1815	1.44946e-09	0.235281	0.437962	0.138354	0.188403
25.203	1.44947e-09	0.235276	0.437963	0.138359	0.188402
25.2246	1.44948e-09	0.235271	0.437964	0.138364	0.188402
25.2461	1.44949e-09	0.235265	0.437965	0.138368	0.188401
25.2676	1.4495e-09	0.23526	0.437966	0.138372	0.188401
25.2892	1.44951e-09	0.235255	0.437968	0.138377	0.188401
25.3108	1.44957e-09	0.235304	0.437936	0.138373	0.188387
25.3324	1.44958e-09	0.235298	0.437937	0.138379	0.188386
25.354	1.44959e-09	0.235292	0.437937	0.138385	0.188385
25.3757	1.4496e-09	0.235287	0.437938	0.138391	0.188384
25.3973	1.44961e-09	0.235281	0.437939	0.138396	0.188383
25.419	1.44962e-09	0.235276	0.43794	0.138402	0.188383
25.4407	1.44963e-09	0.23527	0.437941	0.138407	0.188382
25.4625	1.44964e-09	0.235265	0.437942	0.138412	0.188382
25.4842	1.44965e-09	0.23526	0.437943	0.138417	0.188381
25.5059	1.44971e-09	0.235306	0.437913	0.138414	0.188367
25.5277	1.44972e-09	0.235298	0.43791	0.13842	0.188372
25.5495	1.44973e-09	0.23529	0.437907	0.138425	0.188378
25.5713	1.44974e-09	0.235282	0.437903	0.138431	0.188384
25.5932	1.44975e-09	0.235275	0.4379	0.138436	0.188389
25.615	1.44976e-09	0.235267	0.437897	0.13844	0.188395
25.6369	1.44977e-09	0.23526	0.437895	0.138445	0.1884
25.6588	1.44978e-09	0.235252	0.437892	0.13845	0.188406
25.6807	1.44979e-09	0.235245	0.437889	0.138454	0.188412
25.7026	1.44983e-09	0.235212	0.437903	0.138461	0.188425
25.7245	1.44984e-09	0.235206	0.437904	0.138464	0.188426
25.7465	1.44985e-09	0.235201	0.437904	0.138467	0.188428
25.7685	1.44986e-09	0.235195	0.437905	0.13847	0.18843
25.7905	1.44986e-09	0.23519	0.437906	0.138472	0.188431
25.8125	1.44987e-09	0.235184	0.437908	0.138475	0.188433
25.8345	1.44988e-09	0.235179	0.437909	0.138477	0.188435
25.8566	1.44989e-09	0.235173	0.43791	0.13848	0.188437
25.8787	1.4499e-09	0.235168	0.437911	0.138482	0.188439
25.9008	1.44998e-09	0.235236	0.43787	0.138473	0.188422
25.9229	1.44999e-09	0.23523	0.437871	0.138477	0.188423
25.945	1.45e-09	0.235225	0.437872	0.13848	0.188423
25.9672	1.45001e-09	0.235219	0.437873	0.138484	0.188424
25.9893	1.45001e-09	0.235214	0.437874	0.138488	0.188424
26.0115	1.45002e-09	0.235209	0.437875	0.138491	0.188425
26.0337	1.45003e-09	0.235203	0.437877	0.138494	0.188426
26.0559	1.45004e-09	0.235198	0.437878	0.138498	0.188426
26.0782	1.45005e-09	0.235193	0.43788	0.138501	0.188427
26.1005	1.45012e-09	0.235251	0.437844	0.138494	0.188411
26.1227	1.45013e-09	0.235245	0.437845	0.138499	0.188412
26.145	1.45014e-09	0.235239	0.437845	0.138503	0.188413
26.1674	1.45015e-09	0.235233	0.437846	0.138508	0.188413
26.1897	1.45016e-09	0.235228	0.437847	0.138512	0.188414
26.2121	1.45017e-09	0.235222	0.437848	0.138516	0.188414
26.2344	1.45017e-09	0.235216	0.437849	0.13852	0.188415
26.2568	1.45018e-09	0.235211	0.43785	0.138523	0.188416
26.2793	1.45019e-09	0.235205	0.437851	0.138527	0.188417
26.3017	1.45027e-09	0.235274	0.437809	0.138519	0.188399
26.3241	1.45028e-09	0.235268	0.437809	0.138525	0.188398
26.3466	1.45029e-09	0.235262	0.43781	0.13853	0.188397
26.3691	1.4503e-09	0.235257	0.437811	0.138535	0.188397
26.3916	1.45031e-09	0.235251	0.437813	0.13854	0.188396
26.4142	1.45032e-09	0.235245	0.437814	0.138545	0.188396
26.4367	1.45033e-09	0.23524	0.437815	0.13855	0.188395
26.4593	1.45034e-09	0.235235	0.437816	0.138554	0.188395
26.4819	1.45035e-09	0.235229	0.437818	0.138559	0.188394
26.5045	1.45041e-09	0.235278	0.437787	0.138555	0.18838
26.5271	1.45042e-09	0.235272	0.437787	0.138562	0.188379
26.5498	1.45043e-09	0.235266	0.437788	0.138568	0.188379
26.5724	1.45044e-09	0.23526	0.437788	0.138574	0.188378
26.5951	1.45045e-09	0.235254	0.437789	0.138579	0.188378
26.6178	1.45046e-09	0.235248	0.43779	0.138585	0.188377
26.6405	1.45047e-09	0.235242	0.437791	0.13859	0.188377
26.6633	1.45048e-09	0.235237	0.437792	0.138595	0.188376
26.686	1.45049e-09	0.235231	0.437793	0.1386	0.188376
26.7088	1.45056e-09	0.235283	0.437759	0.138597	0.188361
26.7316	1.45057e-09	0.235275	0.437756	0.138603	0.188367
26.7545	1.45058e-09	0.235267	0.437752	0.138609	0.188372
26.7773	1.45059e-09	0.235259	0.437749	0.138614	0.188378
26.8002	1.4506e-09	0.23525	0.437746	0.13862	0.188384
26.823	1.45061e-09	0.235243	0.437742	0.138625	0.18839
26.8459	1.45062e-09	0.235235	0.437739	0.138629	0.188397
26.8689	1.45063e-09	0.235227	0.437737	0.138634	0.188403
26.8918	1.45064e-09	0.235219	0.437734	0.138638	0.188409
26.9148	1.45069e-09	0.235192	0.437743	0.138645	0.18842
26.9377	1.4507e-09	0.235186	0.437744	0.138648	0.188422
26.9607	1.45071e-09	0.23518	0.437745	0.138651	0.188423
26.9837	1.45072e-09	0.235175	0.437746	0.138654	0.188425
27.0068	1.45073e-09	0.235169	0.437747	0.138657	0.188426
27.0298	1.45074e-09	0.235163	0.437749	0.13866	0.188428
27.0529	1.45074e-09	0.235158	0.43775	0.138663	0.18843
27.076	1.45075e-09	0.235152	0.437751	0.138665	0.188431
27.0991	1.45076e-09	0.235146	0.437753	0.138667	0.188433
27.1223	1.45085e-09	0.235224	0.437706	0.138657	0.188414
27.1454	1.45086e-09	0.235218	0.437707	0.138661	0.188415
27.1686	1.45087e-09	0.235212	0.437707	0.138665	0.188416
27.1918	1.45088e-09	0.235206	0.437708	0.138669	0.188417
27.215	1.45089e-09	0.2352	0.43771	0.138672	0.188418
27.2382	1.4509e-09	0.235195	0.437711	0.138676	0.188419
27.2615	1.45091e-09	0.235189	0.437712	0.138679	0.18842
27.2848	1.45091e-09	0.235183	0.437713	0.138682	0.188421
27.3081	1.45092e-09	0.235178	0.437715	0.138686	0.188422
27.3314	1.451e-09	0.235241	0.437675	0.138678	0.188406
27.3547	1.45101e-09	0.235235	0.437676	0.138683	0.188405
27.3781	1.45102e-09	0.23523	0.437677	0.138688	0.188404
27.4014	1.45103e-09	0.235224	0.437679	0.138693	0.188404
27.4248	1.45104e-09	0.235218	0.43768	0.138698	0.188403
27.4482	1.45105e-09	0.235213	0.437682	0.138703	0.188403
27.4717	1.45106e-09	0.235207	0.437683	0.138707	0.188403
27.4951	1.45107e-09	0.235202	0.437685	0.138711	0.188402
27.5186	1.45108e-09	0.235196	0.437687	0.138715	0.188402
27.5421	1.45114e-09	0.235247	0.437655	0.138711	0.188387
27.5656	1.45115e-09	0.235241	0.437656	0.138717	0.188386
27.5891	1.45116e-09	0.235235	0.437656	0.138723	0.188386
27.6127	1.45117e-09	0.235229	0.437657	0.138728	0.188385
27.6363	1.45118e-09	0.235223	0.437658	0.138734	0.188384
27.6599	1.45119e-09	0.235218	0.43766	0.138739	0.188384
27.6835	1.4512e-09	0.235212	0.437661	0.138744	0.188384
27.7071	1.45121e-09	0.235206	0.437662	0.138748	0.188383
27.7308	1.45122e-09	0.2352	0.437664	0.138753	0.188383
27.7544	1.45129e-09	0.235252	0.437631	0.13875	0.188367
27.7781	1.4513e-09	0.235244	0.437628	0.138755	0.188373
27.8019	1.45131e-09	0.235236	0.437625	0.138761	0.188378
27.8256	1.45132e-09	0.235228	0.437622	0.138766	0.188383
27.8493	1.45133e-09	0.23522	0.43762	0.138771	0.188389
27.8731	1.45134e-09	0.235212	0.437617	0.138776	0.188394
27.8969	1.45135e-09	0.235204	0.437615	0.138781	0.1884
27.9207	1.45136e-09	0.235197	0.437613	0.138785	0.188406
27.9446	1.45137e-09	0.235189	0.437611	0.138789	0.188411
27.9684	1.45142e-09	0.235157	0.437624	0.138796	0.188423
27.9923	1.45143e-09	0.235151	0.437625	0.138799	0.188425
28.0162	1.45144e-09	0.235145	0.437627	0.138802	0.188426
28.0401	1.45145e-09	0.235139	0.437628	0.138805	0.188428
28.0641	1.45146e-09	0.235134	0.43763	0.138808	0.188429
28.088	1.45146e-09	0.235128	0.437631	0.13881	0.188431
28.112	1.45147e-09	0.235122	0.437633	0.138812	0.188432
28.136	1.45148e-09	0.235117	0.437635	0.138815	0.188434
28.16	1.45149e-09	0.235111	0.437637	0.138817	0.188435
28.1841	1.45158e-09	0.235189	0.43759	0.138805	0.188416
28.2081	1.45159e-09	0.235183	0.437591	0.138809	0.188417
28.2322	1.4516e-09	0.235177	0.437592	0.138813	0.188418
28.2563	1.45161e-09	0.235171	0.437593	0.138816	0.188419
28.2804	1.45162e-09	0.235165	0.437594	0.13882	0.188421
28.3046	1.45163e-09	0.235159	0.437596	0.138823	0.188422
28.3287	1.45163e-09	0.235153	0.437597	0.138826	0.188424
28.3529	1.45164e-09	0.235148	0.437598	0.138829	0.188425
28.3771	1.45165e-09	0.235142	0.4376	0.138831	0.188427
28.4014	1.45174e-09	0.23521	0.437558	0.138823	0.188409
28.4256	1.45175e-09	0.235204	0.437559	0.138828	0.18841
28.4499	1.45176e-09	0.235197	0.43756	0.138832	0.18841
28.4742	1.45177e-09	0.235191	0.437561	0.138837	0.188411
28.4985	1.45178e-09	0.235185	0.437562	0.138841	0.188411
28.5228	1.45179e-09	0.235179	0.437564	0.138845	0.188412
28.5472	1.4518e-09	0.235173	0.437565	0.138849	0.188413
28.5715	1.45181e-09	0.235168	0.437567	0.138852	0.188413
28.5959	1.45181e-09	0.235162	0.437568	0.138856	0.188414
28.6203	1.45189e-09	0.235224	0.437529	0.138849	0.188397
28.6448	1.4519e-09	0.235218	0.43753	0.138855	0.188397
28.6692	1.45191e-09	0.235212	0.437531	0.138861	0.188396
28.6937	1.45192e-09	0.235206	0.437532	0.138866	0.188396
28.7182	1.45193e-09	0.2352	0.437534	0.138871	0.188395
28.7427	1.45194e-09	0.235194	0.437535	0.138876	0.188395
28.7673	1.45195e-09	0.235188	0.437537	0.138881	0.188395
28.7918	1.45196e-09	0.235182	0.437538	0.138886	0.188394
28.8164	1.45197e-09	0.235176	0.43754	0.13889	0.188394
28.841	1.45205e-09	0.235239	0.4375	0.138884	0.188376
28.8656	1.45206e-09	0.235233	0.437501	0.138891	0.188375
28.8903	1.45207e-09	0.235226	0.437502	0.138897	0.188374
28.9149	1.45208e-09	0.23522	0.437503	0.138904	0.188373
28.9396	1.45209e-09	0.235214	0.437504	0.13891	0.188373
28.9643	1.4521e-09	0.235208	0.437505	0.138915	0.188372
28.9891	1.45211e-09	0.235202	0.437506	0.138921	0.188371
29.0138	1.45212e-09	0.235196	0.437508	0.138926	0.18837
29.0386	1.45213e-09	0.23519	0.437509	0.138931	0.18837
29.0634	1.4522e-09	0.23524	0.437477	0.138929	0.188354
29.0882	1.45221e-09	0.235231	0.437473	0.138935	0.18836
29.113	1.45222e-09	0.235223	0.43747	0.138941	0.188366
29.1379	1.45224e-09	0.235214	0.437466	0.138947	0.188372
29.1627	1.45225e-09	0.235206	0.437463	0.138953	0.188378
29.1876	1.45226e-09	0.235197	0.43746	0.138958	0.188384
29.2126	1.45227e-09	0.235189	0.437457	0.138963	0.188391
29.2375	1.45228e-09	0.235181	0.437455	0.138968	0.188397
29.2625	1.45229e-09	0.235172	0.437452	0.138972	0.188403
29.2874	1.45235e-09	0.235151	0.437458	0.138978	0.188413
29.3124	1.45236e-09	0.235145	0.437459	0.138982	0.188414
29.3375	1.45237e-09	0.235139	0.437461	0.138985	0.188415
29.3625	1.45238e-09	0.235133	0.437462	0.138988	0.188417
29.3876	1.45239e-09	0.235127	0.437464	0.138992	0.188418
29.4127	1.4524e-09	0.235121	0.437465	0.138995	0.188419
29.4378	1.45241e-09	0.235115	0.437467	0.138997	0.188421
29.4629	1.45241e-09	0.235109	0.437469	0.139	0.188422
29.4881	1.45242e-09	0.235103	0.437471	0.139003	0.188424
29.5133	1.45251e-09	0.23518	0.437424	0.138992	0.188404
29.5384	1.45252e-09	0.235174	0.437425	0.138997	0.188405
29.5637	1.45253e-09	0.235168	0.437426	0.139001	0.188406
29.5889	1.45254e-09	0.235161	0.437427	0.139005	0.188407
29.6142	1.45255e-09	0.235155	0.437428	0.139009	0.188408
29.6394	1.45256e-09	0.235149	0.437429	0.139013	0.188409
29.6648	1.45257e-09	0.235143	0.437431	0.139017	0.18841
29.6901	1.45258e-09	0.235136	0.437432	0.13902	0.188411
29.7154	1.45259e-09	0.23513	0.437434	0.139023	0.188413
29.7408	1.45268e-09	0.235199	0.437391	0.139015	0.188395
29.7662	1.45269e-09	0.235193	0.437392	0.139021	0.188394
29.7916	1.4527e-09	0.235187	0.437393	0.139027	0.188394
29.817	1.45271e-09	0.23518	0.437394	0.139032	0.188394
29.8425	1.45272e-09	0.235174	0.437395	0.139037	0.188394
29.868	1.45273e-09	0.235168	0.437397	0.139042	0.188394
29.8935	1.45274e-09	0.235162	0.437398	0.139046	0.188394
29.919	1.45275e-09	0.235156	0.4374	0.139051	0.188394
29.9445	1.45276e-09	0.235149	0.437402	0.139055	0.188394
29.9701	1.45284e-09	0.235207	0.437365	0.13905	0.188377
29.9957	1.45285e-09	0.2352	0.437366	0.139057	0.188377
30.0213	1.45286e-09	0.235194	0.437367	0.139063	0.188376
30.0469	1.45287e-09	0.235187	0.437368	0.139069	0.188375
30.0726	1.45288e-09	0.235181	0.437369	0.139075	0.188375
30.0983	1.45289e-09	0.235174	0.43737	0.139081	0.188374
30.1239	1.4529e-09	0.235168	0.437372	0.139086	0.188374
30.1497	1.45291e-09	0.235162	0.437373	0.139092	0.188373
30.1754	1.45292e-09	0.235156	0.437375	0.139097	0.188373
30.2012	1.453e-09	0.235222	0.437333	0.139091	0.188354
30.227	1.45302e-09	0.235213	0.43733	0.139098	0.188359
30.2528	1.45303e-09	0.235204	0.437327	0.139104	0.188364
30.2786	1.45304e-09	0.235196	0.437324	0.13911	0.18837
30.3044	1.45305e-09	0.235187	0.437321	0.139116	0.188376
30.3303	1.45306e-09	0.235179	0.437319	0.139121	0.188381
30.3562	1.45307e-09	0.23517	0.437316	0.139126	0.188387
30.3821	1.45308e-09	0.235162	0.437314	0.139131	0.188393
30.4081	1.4531e-09	0.235154	0.437312	0.139136	0.188399
30.434	1.45315e-09	0.235127	0.437321	0.139142	0.18841
30.46	1.45316e-09	0.235121	0.437323	0.139146	0.188411
30.486	1.45317e-09	0.235114	0.437324	0.13915	0.188412
30.512	1.45318e-09	0.235108	0.437326	0.139153	0.188413
30.5381	1.45319e-09	0.235102	0.437328	0.139156	0.188414
30.5642	1.4532e-09	0.235096	0.43733	0.139159	0.188415
30.5902	1.45321e-09	0.23509	0.437332	0.139162	0.188417
30.6164	1.45322e-09	0.235084	0.437334	0.139164	0.188418
30.6425	1.45323e-09	0.235078	0.437336	0.139167	0.188419
30.6687	1.45331e-09	0.235147	0.437294	0.139158	0.188401
30.6948	1.45332e-09	0.23514	0.437294	0.139163	0.188403
30.7211	1.45333e-09	0.235133	0.437295	0.139167	0.188405
30.7473	1.45334e-09	0.235127	0.437296	0.139171	0.188407
30.7735	1.45335e-09	0.23512	0.437297	0.139175	0.188408
30.7998	1.45336e-09	0.235113	0.437298	0.139179	0.18841
30.8261	1.45337e-09	0.235107	0.437299	0.139182	0.188412
30.8524	1.45338e-09	0.2351	0.4373	0.139185	0.188414
30.8788	1.45339e-09	0.235094	0.437302	0.139189	0.188416
30.9051	1.4535e-09	0.235182	0.437247	0.139177	0.188394
30.9315	1.45351e-09	0.235175	0.437248	0.139183	0.188393
30.9579	1.45352e-09	0.235169	0.43725	0.139189	0.188393
30.9843	1.45353e-09	0.235162	0.437251	0.139194	0.188392
31.0108	1.45354e-09	0.235156	0.437253	0.139199	0.188392
31.0373	1.45355e-09	0.23515	0.437255	0.139204	0.188392
31.0638	1.45356e-09	0.235143	0.437257	0.139209	0.188391
31.0903	1.45357e-09	0.235137	0.437259	0.139213	0.188391
31.1168	1.45358e-09	0.235131	0.437261	0.139217	0.188391
31.1434	1.45366e-09	0.235187	0.437225	0.139213	0.188374
31.17	1.45367e-09	0.23518	0.437226	0.13922	0.188373
31.1966	1.45368e-09	0.235174	0.437227	0.139227	0.188373
31.2232	1.45369e-09	0.235167	0.437228	0.139233	0.188372
31.2499	1.4537e-09	0.23516	0.437229	0.139239	0.188372
31.2766	1.45371e-09	0.235153	0.43723	0.139245	0.188371
31.3033	1.45373e-09	0.235147	0.437232	0.13925	0.188371
31.33	1.45374e-09	0.23514	0.437233	0.139256	0.188371
31.3567	1.45375e-09	0.235134	0.437235	0.139261	0.18837
31.3835	1.45383e-09	0.235202	0.437192	0.139255	0.188351
31.4103	1.45384e-09	0.235193	0.437189	0.139262	0.188356
31.4371	1.45385e-09	0.235184	0.437186	0.139269	0.188361
31.464	1.45387e-09	0.235176	0.437183	0.139275	0.188367
31.4908	1.45388e-09	0.235167	0.43718	0.139281	0.188372
31.5177	1.45389e-09	0.235158	0.437178	0.139286	0.188377
31.5446	1.4539e-09	0.23515	0.437176	0.139292	0.188383
31.5715	1.45391e-09	0.235141	0.437174	0.139297	0.188388
31.5985	1.45392e-09	0.235133	0.437172	0.139301	0.188394
31.6255	1.45398e-09	0.235107	0.437181	0.139308	0.188404
31.6525	1.45399e-09	0.2351	0.437183	0.139312	0.188405
31.6795	1.454e-09	0.235094	0.437184	0.139315	0.188406
31.7065	1.45401e-09	0.235088	0.437186	0.139319	0.188407
31.7336	1.45402e-09	0.235081	0.437188	0.139322	0.188408
31.7607	1.45403e-09	0.235075	0.437191	0.139325	0.188409
31.7878	1.45404e-09	0.235069	0.437193	0.139328	0.18841
31.815	1.45405e-09	0.235063	0.437195	0.139331	0.188411
31.8421	1.45406e-09	0.235056	0.437198	0.139333	0.188413
31.8693	1.45415e-09	0.235136	0.437149	0.139323	0.188392
31.8965	1.45416e-09	0.235129	0.43715	0.139328	0.188394
31.9237	1.45417e-09	0.235122	0.437151	0.139332	0.188395
31.951	1.45418e-09	0.235115	0.437152	0.139336	0.188397
31.9783	1.45419e-09	0.235108	0.437153	0.13934	0.188399
32.0056	1.4542e-09	0.235101	0.437154	0.139344	0.188401
32.0329	1.45422e-09	0.235094	0.437155	0.139348	0.188403
32.0603	1.45423e-09	0.235088	0.437157	0.139351	0.188405
32.0876	1.45424e-09	0.235081	0.437158	0.139354	0.188406
32.115	1.45433e-09	0.235159	0.437109	0.139345	0.188387
32.1424	1.45435e-09	0.235152	0.43711	0.139351	0.188387
32.1699	1.45436e-09	0.235145	0.437112	0.139357	0.188386
32.1973	1.45437e-09	0.235138	0.437113	0.139363	0.188386
32.2248	1.45438e-09	0.235131	0.437114	0.139368	0.188386
32.2523	1.45439e-09	0.235125	0.437116	0.139373	0.188386
32.2799	1.4544e-09	0.235118	0.437118	0.139378	0.188386
32.3074	1.45441e-09	0.235112	0.43712	0.139382	0.188386
32.335	1.45442e-09	0.235105	0.437122	0.139387	0.188387
32.3626	1.45451e-09	0.235178	0.437076	0.13938	0.188366
32.3903	1.45452e-09	0.235171	0.437077	0.139387	0.188365
32.4179	1.45454e-09	0.235164	0.437078	0.139394	0.188365
32.4456	1.45455e-09	0.235157	0.437079	0.1394	0.188364
32.4733	1.45456e-09	0.23515	0.43708	0.139407	0.188363
32.501	1.45457e-09	0.235143	0.437082	0.139413	0.188363
32.5288	1.45458e-09	0.235136	0.437083	0.139419	0.188362
32.5565	1.45459e-09	0.235129	0.437085	0.139424	0.188362
32.5843	1.45461e-09	0.235123	0.437087	0.139429	0.188361
32.6121	1.45468e-09	0.235181	0.437049	0.139426	0.188344
32.64	1.4547e-09	0.235172	0.437046	0.139433	0.188349
32.6678	1.45471e-09	0.235162	0.437043	0.13944	0.188355
32.6957	1.45472e-09	0.235153	0.43704	0.139447	0.18836
32.7237	1.45473e-09	0.235144	0.437037	0.139453	0.188366
32.7516	1.45475e-09	0.235135	0.437035	0.139459	0.188371
32.7796	1.45476e-09	0.235126	0.437033	0.139465	0.188377
32.8075	1.45477e-09	0.235117	0.43703	0.13947	0.188383
32.8355	1.45478e-09	0.235108	0.437028	0.139475	0.188388
32.8636	1.45484e-09	0.235089	0.437034	0.139481	0.188397
32.8916	1.45485e-09	0.235081	0.437035	0.139485	0.188399
32.9197	1.45486e-09	0.235074	0.437036	0.139489	0.188401
32.9478	1.45487e-09	0.235068	0.437038	0.139492	0.188402
32.976	1.45488e-09	0.235061	0.437039	0.139496	0.188404
33.0041	1.4549e-09	0.235054	0.437041	0.139499	0.188406
[truncated: 60,437 more rows]

## Sheet: ef
Time (s)	d_p (m)	H2O (wt %)	H2SO4 (wt %)	HNO3 (wt %)	NH3 (wt %)
5.98972	1.35033e-09	0.285322	0.529236	0.00150576	0.183937
6.0154	1.35034e-09	0.285316	0.529239	0.00151138	0.183933
6.04119	1.35041e-09	0.285345	0.529176	0.00151684	0.183961
6.06709	1.35042e-09	0.28534	0.52918	0.0015225	0.183958
6.0931	1.35043e-09	0.285334	0.529184	0.00152818	0.183954
6.11922	1.35043e-09	0.285328	0.529187	0.00153387	0.18395
6.14546	1.35044e-09	0.285323	0.529191	0.00153959	0.183947
6.17181	1.35045e-09	0.285317	0.529195	0.00154532	0.183943
6.19827	1.35046e-09	0.285311	0.529199	0.00155107	0.183939
6.22485	1.35047e-09	0.285305	0.529203	0.00155684	0.183935
6.25153	1.35048e-09	0.285299	0.529206	0.00156262	0.183932
6.27834	1.35055e-09	0.28533	0.529135	0.00156821	0.183966
6.30526	1.35056e-09	0.285324	0.529139	0.00157403	0.183963
6.33229	1.35057e-09	0.285318	0.529143	0.00157987	0.183959
6.35944	1.35058e-09	0.285312	0.529147	0.00158573	0.183955
6.3867	1.35059e-09	0.285306	0.529151	0.0015916	0.183951
6.41409	1.3506e-09	0.2853	0.529155	0.0015975	0.183947
6.44159	1.35061e-09	0.285294	0.529159	0.00160341	0.183943
6.46921	1.35062e-09	0.285288	0.529163	0.00160934	0.183939
6.49694	1.35063e-09	0.285282	0.529167	0.00161529	0.183936
6.5248	1.35069e-09	0.285306	0.529105	0.00162105	0.183968
6.55277	1.3507e-09	0.2853	0.529109	0.00162703	0.183964
6.58087	1.35071e-09	0.285294	0.529113	0.00163303	0.18396
6.60908	1.35072e-09	0.285288	0.529117	0.00163905	0.183956
6.63742	1.35073e-09	0.285282	0.529121	0.00164509	0.183952
6.66588	1.35074e-09	0.285275	0.529126	0.00165114	0.183948
6.69446	1.35075e-09	0.285269	0.52913	0.00165721	0.183944
6.72316	1.35076e-09	0.285263	0.529134	0.0016633	0.18394
6.75198	1.35077e-09	0.285257	0.529138	0.00166941	0.183936
6.78093	1.35085e-09	0.285295	0.529061	0.00167529	0.183969
6.81001	1.35086e-09	0.285288	0.529065	0.00168144	0.183965
6.8392	1.35087e-09	0.285282	0.529069	0.0016876	0.183961
6.86853	1.35088e-09	0.285276	0.529073	0.00169379	0.183957
6.89798	1.35089e-09	0.285269	0.529078	0.0017	0.183953
6.92755	1.3509e-09	0.285263	0.529082	0.00170622	0.183949
6.95725	1.35091e-09	0.285256	0.529087	0.00171246	0.183945
6.98708	1.35092e-09	0.28525	0.529091	0.00171872	0.18394
7.01704	1.35093e-09	0.285243	0.529095	0.001725	0.183936
7.04712	1.35101e-09	0.285278	0.529022	0.00173105	0.183969
7.07734	1.35102e-09	0.285271	0.529026	0.00173736	0.183965
7.10768	1.35103e-09	0.285265	0.529031	0.0017437	0.183961
7.13816	1.35104e-09	0.285258	0.529035	0.00175005	0.183957
7.16876	1.35105e-09	0.285251	0.52904	0.00175643	0.183952
7.1995	1.35106e-09	0.285245	0.529044	0.00176282	0.183948
7.23036	1.35107e-09	0.285238	0.529049	0.00176923	0.183944
7.26136	1.35108e-09	0.285231	0.529054	0.00177565	0.183939
7.2925	1.35109e-09	0.285225	0.529058	0.0017821	0.183935
7.32376	1.35117e-09	0.285252	0.528987	0.0017883	0.183973
7.35516	1.35118e-09	0.285245	0.528991	0.00179478	0.183968
7.3867	1.35119e-09	0.285239	0.528996	0.00180128	0.183964
7.41837	1.3512e-09	0.285232	0.529001	0.0018078	0.18396
7.45018	1.35121e-09	0.285225	0.529005	0.00181434	0.183955
7.48212	1.35122e-09	0.285218	0.52901	0.00182089	0.183951
7.5142	1.35123e-09	0.285211	0.529015	0.00182746	0.183946
7.54641	1.35125e-09	0.285204	0.52902	0.00183406	0.183942
7.57877	1.35126e-09	0.285197	0.529025	0.00184067	0.183937
7.61126	1.35134e-09	0.285236	0.528944	0.001847	0.183973
7.6439	1.35135e-09	0.285229	0.528949	0.00185366	0.183969
7.67667	1.35136e-09	0.285222	0.528954	0.00186033	0.183964
7.70958	1.35137e-09	0.285214	0.528959	0.00186702	0.183959
7.74264	1.35138e-09	0.285207	0.528964	0.00187373	0.183955
7.77583	1.3514e-09	0.2852	0.528969	0.00188046	0.18395
7.80917	1.35141e-09	0.285193	0.528974	0.00188721	0.183946
7.84265	1.35142e-09	0.285186	0.528979	0.00189397	0.183941
7.87628	1.35143e-09	0.285179	0.528984	0.00190076	0.183936
7.91005	1.35152e-09	0.285219	0.5289	0.00190724	0.183974
7.94396	1.35153e-09	0.285211	0.528905	0.00191407	0.18397
7.97802	1.35154e-09	0.285204	0.52891	0.00192091	0.183965
8.01223	1.35155e-09	0.285197	0.528915	0.00192777	0.18396
8.04658	1.35156e-09	0.285189	0.52892	0.00193465	0.183956
8.08108	1.35158e-09	0.285182	0.528926	0.00194155	0.183951
8.11573	1.35159e-09	0.285175	0.528931	0.00194847	0.183946
8.15052	1.3516e-09	0.285167	0.528936	0.0019554	0.183941
8.18547	1.35161e-09	0.28516	0.528941	0.00196236	0.183936
8.22056	1.3517e-09	0.285193	0.52886	0.00196901	0.183978
8.25581	1.35171e-09	0.285185	0.528866	0.001976	0.183973
8.2912	1.35172e-09	0.285177	0.528871	0.00198301	0.183968
8.32675	1.35173e-09	0.28517	0.528877	0.00199003	0.183964
8.36245	1.35174e-09	0.285162	0.528882	0.00199708	0.183959
8.39831	1.35176e-09	0.285155	0.528888	0.00200414	0.183954
8.43431	1.35177e-09	0.285147	0.528893	0.00201123	0.183949
8.47048	1.35178e-09	0.285139	0.528899	0.00201833	0.183944
8.50679	1.35179e-09	0.285131	0.528904	0.00202545	0.183939
8.54327	1.35188e-09	0.285169	0.528822	0.00203226	0.183976
8.5799	1.35189e-09	0.285162	0.528828	0.00203943	0.183971
8.61668	1.3519e-09	0.285154	0.528834	0.00204661	0.183966
8.65362	1.35192e-09	0.285146	0.52884	0.00205382	0.183961
8.69073	1.35193e-09	0.285138	0.528845	0.00206104	0.183956
8.72799	1.35194e-09	0.28513	0.528851	0.00206828	0.183951
8.76541	1.35195e-09	0.285122	0.528857	0.00207554	0.183946
8.80299	1.35197e-09	0.285114	0.528863	0.00208282	0.18394
8.84073	1.35198e-09	0.285106	0.528869	0.00209012	0.183935
8.87864	1.35208e-09	0.285149	0.528776	0.00209705	0.183978
8.9167	1.35209e-09	0.285141	0.528782	0.00210438	0.183973
8.95493	1.3521e-09	0.285133	0.528788	0.00211174	0.183967
8.99333	1.35212e-09	0.285125	0.528794	0.00211912	0.183962
9.03189	1.35213e-09	0.285117	0.5288	0.00212651	0.183957
9.07061	1.35214e-09	0.285109	0.528806	0.00213392	0.183952
9.1095	1.35215e-09	0.2851	0.528812	0.00214135	0.183946
9.14856	1.35217e-09	0.285092	0.528818	0.0021488	0.183941
9.18778	1.35218e-09	0.285084	0.528824	0.00215627	0.183936
9.22717	1.35228e-09	0.285127	0.528732	0.00216336	0.183978
9.26674	1.35229e-09	0.285118	0.528738	0.00217087	0.183973
9.30647	1.3523e-09	0.28511	0.528744	0.0021784	0.183967
9.34637	1.35232e-09	0.285101	0.528751	0.00218595	0.183962
9.38644	1.35233e-09	0.285093	0.528757	0.00219352	0.183956
9.42668	1.35234e-09	0.285084	0.528763	0.00220111	0.183951
9.4671	1.35236e-09	0.285076	0.52877	0.00220871	0.183945
9.50769	1.35237e-09	0.285067	0.528776	0.00221633	0.18394
9.54846	1.35238e-09	0.285059	0.528783	0.00222398	0.183934
9.58939	1.35249e-09	0.285106	0.52868	0.00223118	0.183983
9.63051	1.3525e-09	0.285097	0.528687	0.00223886	0.183977
9.6718	1.35252e-09	0.285089	0.528693	0.00224655	0.183971
9.71327	1.35253e-09	0.28508	0.5287	0.00225427	0.183966
9.75491	1.35255e-09	0.285071	0.528707	0.00226201	0.18396
9.79674	1.35256e-09	0.285062	0.528713	0.00226976	0.183955
9.83874	1.35257e-09	0.285054	0.52872	0.00227753	0.183949
9.88092	1.35259e-09	0.285045	0.528727	0.00228532	0.183943
9.92329	1.3526e-09	0.285036	0.528734	0.00229313	0.183937
9.96583	1.3527e-09	0.285079	0.528638	0.00230052	0.183982
10.0086	1.35272e-09	0.28507	0.528645	0.00230837	0.183976
10.0515	1.35273e-09	0.285061	0.528652	0.00231623	0.183971
10.0946	1.35275e-09	0.285052	0.528659	0.00232412	0.183965
10.1378	1.35276e-09	0.285043	0.528666	0.00233202	0.183959
10.1813	1.35277e-09	0.285034	0.528673	0.00233994	0.183953
10.225	1.35279e-09	0.285025	0.52868	0.00234789	0.183947
10.2688	1.3528e-09	0.285016	0.528687	0.00235584	0.183941
10.3128	1.35282e-09	0.285006	0.528694	0.00236382	0.183935
10.357	1.35293e-09	0.285064	0.528581	0.00237129	0.183983
10.4015	1.35295e-09	0.285055	0.528589	0.00237931	0.183977
10.446	1.35296e-09	0.285045	0.528596	0.00238735	0.183971
10.4908	1.35298e-09	0.285036	0.528603	0.0023954	0.183965
10.5358	1.35299e-09	0.285027	0.52861	0.00240348	0.183959
10.581	1.35301e-09	0.285017	0.528618	0.00241157	0.183953
10.6264	1.35302e-09	0.285008	0.528625	0.00241968	0.183947
10.6719	1.35304e-09	0.284998	0.528633	0.00242781	0.183941
10.7177	1.35305e-09	0.284989	0.52864	0.00243596	0.183935
10.7636	1.35317e-09	0.285039	0.528533	0.0024436	0.183984
10.8098	1.35318e-09	0.285029	0.52854	0.0024518	0.183978
10.8561	1.3532e-09	0.28502	0.528548	0.00246001	0.183972
10.9027	1.35321e-09	0.28501	0.528556	0.00246824	0.183966
10.9494	1.35323e-09	0.285	0.528563	0.00247649	0.18396
10.9964	1.35324e-09	0.284991	0.528571	0.00248475	0.183953
11.0435	1.35326e-09	0.284981	0.528579	0.00249304	0.183947
11.0908	1.35327e-09	0.284971	0.528587	0.00250134	0.183941
11.1384	1.35329e-09	0.284961	0.528595	0.00250966	0.183934
11.1862	1.35341e-09	0.285016	0.528478	0.00251741	0.183988
11.2341	1.35343e-09	0.285006	0.528486	0.00252576	0.183982
11.2823	1.35344e-09	0.284996	0.528494	0.00253414	0.183976
11.3307	1.35346e-09	0.284986	0.528502	0.00254253	0.183969
11.3792	1.35347e-09	0.284976	0.52851	0.00255094	0.183963
11.428	1.35349e-09	0.284966	0.528518	0.00255937	0.183956
11.477	1.35351e-09	0.284956	0.528526	0.00256782	0.18395
11.5262	1.35352e-09	0.284946	0.528535	0.00257628	0.183943
11.5756	1.35354e-09	0.284936	0.528543	0.00258477	0.183937
11.6253	1.35366e-09	0.284994	0.528426	0.00259266	0.183988
11.6751	1.35368e-09	0.284984	0.528434	0.00260118	0.183981
11.7252	1.35369e-09	0.284973	0.528443	0.00260972	0.183974
11.7754	1.35371e-09	0.284963	0.528451	0.00261828	0.183968
11.8259	1.35373e-09	0.284953	0.52846	0.00262686	0.183961
11.8766	1.35374e-09	0.284942	0.528468	0.00263545	0.183954
11.9276	1.35376e-09	0.284932	0.528477	0.00264406	0.183948
11.9787	1.35378e-09	0.284921	0.528485	0.00265269	0.183941
12.0301	1.35379e-09	0.284911	0.528494	0.00266133	0.183934
12.0816	1.35392e-09	0.284973	0.528368	0.00266932	0.183989
12.1334	1.35394e-09	0.284963	0.528377	0.002678	0.183982
12.1855	1.35396e-09	0.284952	0.528386	0.00268669	0.183976
12.2377	1.35397e-09	0.284941	0.528394	0.0026954	0.183969
12.2902	1.35399e-09	0.284931	0.528403	0.00270413	0.183962
12.3429	1.35401e-09	0.28492	0.528412	0.00271288	0.183955
12.3958	1.35403e-09	0.284909	0.528421	0.00272164	0.183948
12.4489	1.35404e-09	0.284898	0.52843	0.00273042	0.183941
12.5023	1.35406e-09	0.284887	0.528439	0.00273922	0.183934
12.5559	1.35419e-09	0.284943	0.528319	0.00274736	0.183991
12.6097	1.35421e-09	0.284932	0.528328	0.00275619	0.183984
12.6638	1.35422e-09	0.284921	0.528337	0.00276504	0.183976
12.7181	1.35424e-09	0.28491	0.528346	0.00277391	0.183969
12.7726	1.35426e-09	0.284899	0.528356	0.00278279	0.183962
12.8274	1.35428e-09	0.284888	0.528365	0.00279169	0.183955
12.8824	1.35429e-09	0.284877	0.528374	0.00280061	0.183948
12.9376	1.35431e-09	0.284866	0.528384	0.00280954	0.183941
12.9931	1.35433e-09	0.284855	0.528393	0.00281849	0.183933
13.0488	1.35448e-09	0.284926	0.528252	0.00282665	0.183995
13.1047	1.35449e-09	0.284915	0.528262	0.00283564	0.183987
13.1609	1.35451e-09	0.284904	0.528272	0.00284464	0.18398
13.2174	1.35453e-09	0.284892	0.528281	0.00285366	0.183973
13.274	1.35455e-09	0.284881	0.528291	0.0028627	0.183965
13.3309	1.35457e-09	0.284869	0.528301	0.00287175	0.183958
13.3881	1.35458e-09	0.284858	0.528311	0.00288082	0.18395
13.4455	1.3546e-09	0.284846	0.528321	0.0028899	0.183943
13.5031	1.35462e-09	0.284835	0.528331	0.002899	0.183935
13.561	1.35476e-09	0.284903	0.528196	0.00290732	0.183994
13.6192	1.35478e-09	0.284891	0.528206	0.00291646	0.183987
13.6776	1.3548e-09	0.284879	0.528216	0.00292562	0.183979
13.7362	1.35482e-09	0.284868	0.528226	0.00293479	0.183972
13.7951	1.35484e-09	0.284856	0.528236	0.00294398	0.183964
13.8543	1.35486e-09	0.284844	0.528247	0.00295318	0.183956
13.9137	1.35488e-09	0.284832	0.528257	0.0029624	0.183949
13.9733	1.3549e-09	0.28482	0.528268	0.00297163	0.183941
14.0332	1.35491e-09	0.284808	0.528278	0.00298088	0.183933
14.0934	1.35506e-09	0.284879	0.528136	0.00298928	0.183996
14.1538	1.35508e-09	0.284867	0.528147	0.00299856	0.183988
14.2145	1.3551e-09	0.284855	0.528157	0.00300786	0.18398
14.2754	1.35512e-09	0.284843	0.528168	0.00301717	0.183972
14.3366	1.35514e-09	0.28483	0.528179	0.00302649	0.183964
14.3981	1.35516e-09	0.284818	0.52819	0.00303583	0.183956
14.4598	1.35518e-09	0.284806	0.528201	0.00304518	0.183948
14.5218	1.3552e-09	0.284793	0.528212	0.00305455	0.18394
14.5841	1.35522e-09	0.284781	0.528223	0.00306393	0.183932
14.6466	1.35538e-09	0.284858	0.528074	0.00307242	0.183996
14.7094	1.3554e-09	0.284845	0.528085	0.00308185	0.183988
14.7725	1.35542e-09	0.284833	0.528096	0.0030913	0.18398
14.8358	1.35544e-09	0.28482	0.528107	0.00310076	0.183972
14.8994	1.35546e-09	0.284807	0.528119	0.00311023	0.183964
14.9633	1.35548e-09	0.284795	0.52813	0.00311972	0.183956
15.0275	1.3555e-09	0.284782	0.528142	0.00312922	0.183947
15.0919	1.35552e-09	0.284769	0.528153	0.00313874	0.183939
15.1566	1.35554e-09	0.284756	0.528165	0.00314826	0.183931
15.2216	1.3557e-09	0.284832	0.528013	0.00315683	0.183999
15.2869	1.35572e-09	0.284819	0.528024	0.00316638	0.18399
15.3524	1.35574e-09	0.284806	0.528036	0.00317595	0.183982
15.4182	1.35576e-09	0.284793	0.528048	0.00318553	0.183973
15.4843	1.35578e-09	0.28478	0.52806	0.00319512	0.183965
15.5507	1.3558e-09	0.284767	0.528072	0.00320473	0.183957
15.6174	1.35582e-09	0.284754	0.528084	0.00321435	0.183948
15.6843	1.35584e-09	0.28474	0.528096	0.00322398	0.18394
15.7516	1.35586e-09	0.284727	0.528108	0.00323362	0.183931
15.8191	1.35603e-09	0.284806	0.527953	0.00324227	0.183998
15.8869	1.35605e-09	0.284793	0.527966	0.00325196	0.18399
15.9551	1.35607e-09	0.284779	0.527978	0.00326165	0.183981
16.0235	1.35609e-09	0.284766	0.52799	0.00327136	0.183972
16.0922	1.35611e-09	0.284752	0.528003	0.00328109	0.183964
16.1612	1.35614e-09	0.284739	0.528016	0.00329082	0.183955
16.2305	1.35616e-09	0.284725	0.528028	0.00330057	0.183946
16.3	1.35618e-09	0.284711	0.528041	0.00331032	0.183937
16.3699	1.3562e-09	0.284698	0.528054	0.00332009	0.183929
16.4401	1.35637e-09	0.284785	0.52789	0.00332877	0.183996
16.5106	1.3564e-09	0.284771	0.527903	0.00333857	0.183987
16.5814	1.35642e-09	0.284757	0.527916	0.00334838	0.183978
16.6525	1.35644e-09	0.284744	0.527929	0.00335821	0.183969
16.7239	1.35646e-09	0.28473	0.527942	0.00336804	0.18396
16.7956	1.35648e-09	0.284716	0.527955	0.00337789	0.183951
16.8676	1.35651e-09	0.284702	0.527968	0.00338774	0.183942
16.9399	1.35653e-09	0.284687	0.527982	0.00339761	0.183933
17.0125	1.35655e-09	0.284673	0.527995	0.00340748	0.183924
17.0855	1.35673e-09	0.28476	0.527824	0.00341619	0.184
17.1587	1.35676e-09	0.284746	0.527838	0.0034261	0.18399
17.2323	1.35678e-09	0.284732	0.527851	0.00343602	0.183981
17.3062	1.3568e-09	0.284717	0.527865	0.00344595	0.183972
17.3804	1.35682e-09	0.284703	0.527879	0.0034559	0.183962
17.4549	1.35685e-09	0.284688	0.527893	0.00346585	0.183953
17.5297	1.35687e-09	0.284674	0.527907	0.00347581	0.183944
17.6049	1.35689e-09	0.284659	0.527921	0.00348577	0.183934
17.6804	1.35692e-09	0.284645	0.527935	0.00349575	0.183925
17.7562	1.3571e-09	0.284739	0.527758	0.0035045	0.183998
17.8323	1.35713e-09	0.284724	0.527773	0.00351451	0.183988
17.9088	1.35715e-09	0.28471	0.527787	0.00352454	0.183979
17.9856	1.35717e-09	0.284695	0.527801	0.00353457	0.183969
18.0627	1.3572e-09	0.28468	0.527816	0.00354461	0.18396
18.1401	1.35722e-09	0.284665	0.52783	0.00355467	0.18395
18.2179	1.35724e-09	0.28465	0.527845	0.00356472	0.18394
18.296	1.35727e-09	0.284635	0.52786	0.00357479	0.183931
18.3744	1.35729e-09	0.28462	0.527875	0.00358487	0.183921
18.4532	1.35749e-09	0.284721	0.527687	0.0035936	0.183998
18.5323	1.35752e-09	0.284706	0.527702	0.00360371	0.183989
18.6118	1.35754e-09	0.284691	0.527717	0.00361383	0.183979
18.6916	1.35756e-09	0.284675	0.527732	0.00362396	0.183969
18.7717	1.35759e-09	0.28466	0.527747	0.0036341	0.183959
18.8522	1.35761e-09	0.284645	0.527762	0.00364425	0.183949
18.933	1.35764e-09	0.284629	0.527778	0.0036544	0.183939
19.0142	1.35766e-09	0.284613	0.527793	0.00366456	0.183929
19.0957	1.35769e-09	0.284598	0.527809	0.00367473	0.183919
19.1776	1.35789e-09	0.2847	0.527616	0.00368346	0.184
19.2598	1.35792e-09	0.284685	0.527632	0.00369366	0.18399
19.3424	1.35794e-09	0.284669	0.527648	0.00370386	0.183979
19.4253	1.35797e-09	0.284653	0.527664	0.00371406	0.183969
19.5086	1.35799e-09	0.284637	0.52768	0.00372427	0.183959
19.5923	1.35802e-09	0.284621	0.527696	0.00373449	0.183948
19.6763	1.35804e-09	0.284605	0.527712	0.00374471	0.183938
19.7606	1.35807e-09	0.284589	0.527728	0.00375494	0.183928
19.8454	1.35809e-09	0.284573	0.527745	0.00376517	0.183917
19.9304	1.3583e-09	0.284679	0.52755	0.00377394	0.183998
20.0159	1.35833e-09	0.284662	0.527566	0.00378422	0.183987
20.1017	1.35835e-09	0.284646	0.527583	0.0037945	0.183977
20.1879	1.35838e-09	0.28463	0.527599	0.00380479	0.183966
20.2745	1.3584e-09	0.284613	0.527616	0.00381508	0.183956
20.3614	1.35843e-09	0.284597	0.527633	0.00382538	0.183945
20.4487	1.35846e-09	0.28458	0.52765	0.00383568	0.183934
20.5363	1.35848e-09	0.284563	0.527667	0.00384599	0.183924
20.6244	1.35851e-09	0.284547	0.527684	0.0038563	0.183913
20.7128	1.35873e-09	0.284658	0.527478	0.00386501	0.183998
20.8016	1.35875e-09	0.284641	0.527496	0.00387535	0.183987
20.8908	1.35878e-09	0.284625	0.527513	0.00388569	0.183977
20.9804	1.35881e-09	0.284608	0.527531	0.00389604	0.183966
21.0703	1.35884e-09	0.284591	0.527548	0.00390639	0.183955
21.1607	1.35886e-09	0.284574	0.527566	0.00391674	0.183944
21.2514	1.35889e-09	0.284557	0.527584	0.0039271	0.183933
21.3425	1.35892e-09	0.284539	0.527602	0.00393746	0.183922
21.434	1.35894e-09	0.284522	0.52762	0.00394782	0.18391
21.5259	1.35917e-09	0.284634	0.527412	0.00395652	0.183997
21.6182	1.35919e-09	0.284617	0.52743	0.00396692	0.183986
21.7109	1.35922e-09	0.2846	0.527448	0.00397731	0.183975
21.804	1.35925e-09	0.284582	0.527467	0.00398771	0.183963
21.8975	1.35928e-09	0.284565	0.527485	0.00399811	0.183952
21.9914	1.3593e-09	0.284547	0.527504	0.00400851	0.183941
22.0856	1.35933e-09	0.284529	0.527522	0.00401891	0.183929
22.1803	1.35936e-09	0.284512	0.527541	0.00402931	0.183918
22.2754	1.35939e-09	0.284494	0.52756	0.00403971	0.183906
22.3709	1.35963e-09	0.28462	0.527334	0.00404825	0.183998
22.4668	1.35966e-09	0.284602	0.527353	0.00405867	0.183986
22.5632	1.35969e-09	0.284584	0.527372	0.00406909	0.183975
22.6599	1.35971e-09	0.284566	0.527391	0.0040795	0.183963
22.7571	1.35974e-09	0.284548	0.527411	0.00408992	0.183951
22.8546	1.35977e-09	0.28453	0.52743	0.00410034	0.183939
22.9526	1.3598e-09	0.284512	0.52745	0.00411076	0.183928
23.051	1.35983e-09	0.284493	0.52747	0.00412117	0.183916
23.1499	1.35986e-09	0.284475	0.527489	0.00413159	0.183904
23.2491	1.3601e-09	0.284604	0.527262	0.0041401	0.183994
23.3488	1.36013e-09	0.284585	0.527282	0.00415055	0.183982
23.4489	1.36016e-09	0.284567	0.527302	0.004161	0.18397
23.5494	1.36019e-09	0.284548	0.527322	0.00417145	0.183958
23.6504	1.36022e-09	0.284529	0.527343	0.00418189	0.183946
23.7518	1.36025e-09	0.284511	0.527363	0.00419233	0.183934
23.8536	1.36028e-09	0.284492	0.527384	0.00420278	0.183922
23.9559	1.36031e-09	0.284473	0.527404	0.00421321	0.18391
24.0586	1.36034e-09	0.284454	0.527425	0.00422365	0.183897
24.1618	1.36059e-09	0.284583	0.527191	0.00423208	0.183994
24.2654	1.36062e-09	0.284564	0.527212	0.00424256	0.183981
24.3694	1.36065e-09	0.284545	0.527233	0.00425303	0.183969
24.4739	1.36068e-09	0.284526	0.527254	0.00426349	0.183956
24.5788	1.36071e-09	0.284506	0.527276	0.00427395	0.183944
24.6842	1.36074e-09	0.284487	0.527297	0.00428441	0.183931
24.79	1.36077e-09	0.284467	0.527319	0.00429487	0.183919
24.8963	1.36081e-09	0.284448	0.52734	0.00430532	0.183906
25.0031	1.36084e-09	0.284428	0.527362	0.00431576	0.183894
25.1103	1.3611e-09	0.284566	0.527118	0.00432405	0.183992
25.2179	1.36113e-09	0.284546	0.52714	0.00433451	0.183979
25.326	1.36116e-09	0.284527	0.527162	0.00434497	0.183966
25.4346	1.36119e-09	0.284507	0.527184	0.00435542	0.183954
25.5437	1.36122e-09	0.284487	0.527207	0.00436586	0.183941
25.6532	1.36126e-09	0.284467	0.527229	0.0043763	0.183928
25.7632	1.36129e-09	0.284447	0.527252	0.00438674	0.183915
25.8736	1.36132e-09	0.284427	0.527275	0.00439716	0.183902
25.9846	1.36135e-09	0.284406	0.527297	0.00440759	0.183889
26.096	1.36163e-09	0.284561	0.527034	0.00441566	0.183989
26.2079	1.36166e-09	0.284541	0.527058	0.00442612	0.183976
26.3202	1.3617e-09	0.28452	0.527081	0.00443657	0.183963
26.4331	1.36173e-09	0.2845	0.527104	0.00444702	0.183949
26.5464	1.36176e-09	0.284479	0.527128	0.00445746	0.183936
26.6602	1.36179e-09	0.284458	0.527151	0.00446789	0.183923
26.7745	1.36183e-09	0.284438	0.527175	0.00447831	0.183909
26.8893	1.36186e-09	0.284417	0.527199	0.00448872	0.183896
27.0046	1.36189e-09	0.284396	0.527223	0.00449913	0.183882
27.1204	1.36217e-09	0.284542	0.526965	0.00450716	0.183986
27.2367	1.3622e-09	0.284521	0.526989	0.00451758	0.183972
27.3535	1.36224e-09	0.2845	0.527014	0.00452799	0.183959
27.4707	1.36227e-09	0.284478	0.527038	0.00453839	0.183945
27.5885	1.36231e-09	0.284457	0.527063	0.00454879	0.183931
27.7068	1.36234e-09	0.284436	0.527087	0.00455917	0.183918
27.8256	1.36237e-09	0.284414	0.527112	0.00456954	0.183904
27.9449	1.36241e-09	0.284393	0.527137	0.00457991	0.18389
28.0647	1.36244e-09	0.284371	0.527163	0.00459026	0.183876
28.185	1.36273e-09	0.284529	0.526888	0.00459806	0.183985
28.3059	1.36277e-09	0.284507	0.526914	0.00460845	0.183971
28.4272	1.3628e-09	0.284486	0.526939	0.00461883	0.183957
28.5491	1.36284e-09	0.284464	0.526965	0.0046292	0.183942
28.6715	1.36287e-09	0.284442	0.526991	0.00463956	0.183928
28.7945	1.36291e-09	0.28442	0.527016	0.00464991	0.183914
28.9179	1.36294e-09	0.284398	0.527043	0.00466024	0.1839
29.0419	1.36298e-09	0.284375	0.527069	0.00467057	0.183885
29.1664	1.36302e-09	0.284353	0.527095	0.00468088	0.183871
29.2915	1.36332e-09	0.284521	0.526809	0.00468843	0.183982
29.417	1.36336e-09	0.284498	0.526835	0.00469876	0.183968
29.5432	1.36339e-09	0.284476	0.526862	0.00470907	0.183953
29.6698	1.36343e-09	0.284453	0.526889	0.00471937	0.183939
29.797	1.36347e-09	0.284431	0.526916	0.00472965	0.183924
29.9248	1.3635e-09	0.284408	0.526943	0.00473992	0.183909
30.0531	1.36354e-09	0.284385	0.52697	0.00475018	0.183894
30.182	1.36358e-09	0.284362	0.526998	0.00476042	0.18388
30.3114	1.36361e-09	0.284339	0.527025	0.00477065	0.183865
30.4413	1.36393e-09	0.284515	0.526729	0.00477799	0.183978
30.5718	1.36397e-09	0.284492	0.526757	0.00478826	0.183963
30.7029	1.364e-09	0.284469	0.526785	0.00479851	0.183948
30.8345	1.36404e-09	0.284445	0.526813	0.00480874	0.183933
30.9667	1.36408e-09	0.284422	0.526841	0.00481896	0.183918
31.0995	1.36412e-09	0.284398	0.52687	0.00482917	0.183903
31.2329	1.36415e-09	0.284375	0.526898	0.00483935	0.183887
31.3668	1.36419e-09	0.284351	0.526927	0.00484952	0.183872
31.5012	1.36423e-09	0.284327	0.526956	0.00485968	0.183857
31.6363	1.36455e-09	0.284504	0.526659	0.00486687	0.183971
31.7719	1.36459e-09	0.28448	0.526688	0.00487706	0.183956
31.9082	1.36463e-09	0.284456	0.526717	0.00488724	0.18394
32.045	1.36466e-09	0.284431	0.526747	0.00489739	0.183924
32.1824	1.3647e-09	0.284407	0.526776	0.00490753	0.183909
32.3203	1.36474e-09	0.284383	0.526806	0.00491765	0.183893
32.4589	1.36478e-09	0.284359	0.526836	0.00492775	0.183877
32.5981	1.36482e-09	0.284334	0.526866	0.00493783	0.183862
32.7379	1.36486e-09	0.28431	0.526897	0.0049479	0.183846
32.8782	1.36521e-09	0.284511	0.526572	0.00495476	0.183962
33.0192	1.36525e-09	0.284487	0.526602	0.00496494	0.183946
33.1607	1.36528e-09	0.284462	0.526633	0.0049751	0.18393
33.3029	1.36532e-09	0.284437	0.526664	0.00498524	0.183914
33.4457	1.36536e-09	0.284412	0.526695	0.00499536	0.183898
33.5891	1.3654e-09	0.284387	0.526726	0.00500546	0.183882
33.7331	1.36545e-09	0.284361	0.526757	0.00501555	0.183866
33.8777	1.36549e-09	0.284336	0.526789	0.00502561	0.183849
34.023	1.36553e-09	0.284311	0.526821	0.00503565	0.183833
34.1689	1.36588e-09	0.284505	0.526494	0.00504228	0.183959
34.3154	1.36592e-09	0.284479	0.526526	0.00505233	0.183943
34.4625	1.36596e-09	0.284454	0.526558	0.00506235	0.183926
34.6103	1.366e-09	0.284428	0.52659	0.00507235	0.18391
34.7586	1.36604e-09	0.284402	0.526623	0.00508234	0.183893
34.9077	1.36608e-09	0.284376	0.526655	0.00509229	0.183876
35.0573	1.36612e-09	0.28435	0.526688	0.00510223	0.183859
35.2076	1.36617e-09	0.284324	0.526721	0.00511214	0.183843
35.3586	1.36621e-09	0.284298	0.526754	0.00512203	0.183826
35.5102	1.36657e-09	0.284504	0.526414	0.00512831	0.183954
35.6624	1.36662e-09	0.284477	0.526448	0.0051382	0.183937
35.8153	1.36666e-09	0.284451	0.526481	0.00514807	0.18392
35.9689	1.3667e-09	0.284424	0.526515	0.00515791	0.183903
36.1231	1.36674e-09	0.284397	0.526549	0.00516773	0.183885
36.278	1.36679e-09	0.284371	0.526584	0.00517752	0.183868
36.4335	1.36683e-09	0.284344	0.526618	0.00518729	0.183851
36.5897	1.36687e-09	0.284317	0.526653	0.00519704	0.183833
36.7466	1.36692e-09	0.28429	0.526687	0.00520676	0.183816
36.9042	1.3673e-09	0.284503	0.526335	0.00521267	0.183949
37.0624	1.36734e-09	0.284476	0.52637	0.00522238	0.183931
37.2213	1.36738e-09	0.284449	0.526405	0.00523207	0.183914
37.3809	1.36743e-09	0.284421	0.526441	0.00524173	0.183896
37.5412	1.36747e-09	0.284394	0.526477	0.00525136	0.183878
37.7021	1.36751e-09	0.284366	0.526512	0.00526097	0.18386
37.8638	1.36756e-09	0.284338	0.526548	0.00527055	0.183843
38.0261	1.3676e-09	0.284311	0.526585	0.00528011	0.183825
38.1891	1.36765e-09	0.284283	0.526621	0.00528964	0.183807
38.3529	1.36804e-09	0.284506	0.526253	0.00529512	0.183946
38.5173	1.36809e-09	0.284478	0.52629	0.00530463	0.183928
38.6824	1.36813e-09	0.28445	0.526327	0.00531412	0.183909
38.8483	1.36818e-09	0.284421	0.526364	0.00532358	0.183891
39.0149	1.36823e-09	0.284393	0.526401	0.00533301	0.183873
39.1821	1.36827e-09	0.284365	0.526439	0.00534241	0.183854
39.3501	1.36832e-09	0.284336	0.526477	0.00535178	0.183836
39.5188	1.36836e-09	0.284307	0.526514	0.00536113	0.183817
39.6883	1.36841e-09	0.284278	0.526553	0.00537044	0.183799
39.8584	1.36882e-09	0.284514	0.526171	0.00537548	0.183939
40.0293	1.36887e-09	0.284485	0.52621	0.00538478	0.183921
40.201	1.36891e-09	0.284456	0.526248	0.00539404	0.183902
40.3733	1.36896e-09	0.284427	0.526287	0.00540327	0.183883
40.5464	1.36901e-09	0.284397	0.526326	0.00541248	0.183864
40.7203	1.36905e-09	0.284368	0.526366	0.00542165	0.183845
40.8948	1.3691e-09	0.284338	0.526405	0.00543079	0.183826
41.0702	1.36915e-09	0.284309	0.526445	0.0054399	0.183807
41.2463	1.3692e-09	0.284279	0.526485	0.00544898	0.183787
41.4231	1.36962e-09	0.284525	0.526088	0.00545354	0.183933
41.6007	1.36967e-09	0.284495	0.526129	0.00546259	0.183914
41.7791	1.36972e-09	0.284465	0.526169	0.0054716	0.183894
41.9582	1.36977e-09	0.284435	0.52621	0.00548059	0.183875
42.1381	1.36982e-09	0.284404	0.526251	0.00548954	0.183855
42.3188	1.36987e-09	0.284374	0.526292	0.00549846	0.183835
42.5002	1.36992e-09	0.284343	0.526333	0.00550734	0.183816
42.6824	1.36996e-09	0.284313	0.526375	0.00551619	0.183796
42.8654	1.37001e-09	0.284282	0.526417	0.00552501	0.183776
43.0492	1.37045e-09	0.284547	0.526009	0.00552946	0.183915
43.2338	1.3705e-09	0.284516	0.526051	0.00553858	0.183895
43.4191	1.37055e-09	0.284485	0.526093	0.00554768	0.183874
43.6053	1.3706e-09	0.284453	0.526136	0.00555673	0.183854
43.7922	1.37065e-09	0.284422	0.526178	0.00556576	0.183834
43.98	1.3707e-09	0.28439	0.526221	0.00557474	0.183814
44.1686	1.37076e-09	0.284359	0.526264	0.00558369	0.183793
44.3579	1.37081e-09	0.284327	0.526308	0.00559261	0.183773
44.5481	1.37086e-09	0.284295	0.526351	0.00560149	0.183752
44.7391	1.37132e-09	0.284558	0.525927	0.00560539	0.183909
44.9309	1.37137e-09	0.284526	0.525971	0.00561424	0.183889
45.1236	1.37142e-09	0.284494	0.526016	0.00562304	0.183868
45.317	1.37147e-09	0.284461	0.52606	0.00563181	0.183847
45.5113	1.37152e-09	0.284429	0.526105	0.00564055	0.183826
45.7065	1.37157e-09	0.284396	0.526149	0.00564924	0.183805
45.9024	1.37163e-09	0.284364	0.526194	0.0056579	0.183784
46.0992	1.37168e-09	0.284331	0.52624	0.00566652	0.183763
46.2969	1.37173e-09	0.284298	0.526285	0.0056751	0.183742
46.4954	1.37221e-09	0.284577	0.525842	0.0056784	0.183903
46.6947	1.37226e-09	0.284544	0.525888	0.00568693	0.183881
46.8949	1.37232e-09	0.284511	0.525934	0.00569542	0.18386
47.096	1.37237e-09	0.284477	0.52598	0.00570388	0.183838
47.2979	1.37243e-09	0.284444	0.526027	0.0057123	0.183817
47.5007	1.37248e-09	0.28441	0.526074	0.00572068	0.183795
47.7044	1.37253e-09	0.284377	0.526121	0.00572901	0.183773
47.9089	1.37259e-09	0.284343	0.526168	0.00573731	0.183751
48.1143	1.37264e-09	0.284309	0.526216	0.00574557	0.18373
48.3206	1.37312e-09	0.284586	0.525775	0.00574848	0.18389
48.5278	1.37318e-09	0.284552	0.525824	0.00575667	0.183868
48.7358	1.37323e-09	0.284518	0.525872	0.00576482	0.183845
48.9448	1.37329e-09	0.284483	0.52592	0.00577294	0.183823
49.1546	1.37334e-09	0.284449	0.525969	0.00578101	0.183801
49.3654	1.3734e-09	0.284414	0.526018	0.00578905	0.183779
49.577	1.37346e-09	0.284379	0.526068	0.00579704	0.183756
49.7896	1.37351e-09	0.284344	0.526117	0.00580499	0.183733
50.0031	1.37357e-09	0.284309	0.526167	0.0058129	0.183711
50.2175	1.37409e-09	0.284628	0.525682	0.00581526	0.183875
50.4328	1.37415e-09	0.284592	0.525732	0.00582348	0.183852
50.649	1.37421e-09	0.284557	0.525782	0.00583167	0.183829
50.8661	1.37426e-09	0.284521	0.525833	0.00583981	0.183806
51.0842	1.37432e-09	0.284485	0.525883	0.00584791	0.183783
51.3033	1.37438e-09	0.284449	0.525935	0.00585596	0.18376
51.5232	1.37444e-09	0.284413	0.525986	0.00586398	0.183737
51.7441	1.3745e-09	0.284377	0.526038	0.00587194	0.183713
51.966	1.37455e-09	0.284341	0.526089	0.00587987	0.18369
52.1888	1.37509e-09	0.284655	0.525597	0.00588167	0.183867
52.4125	1.37515e-09	0.284618	0.525649	0.00588952	0.183843
52.6373	1.37521e-09	0.284581	0.525702	0.00589732	0.183819
52.8629	1.37527e-09	0.284544	0.525755	0.00590508	0.183796
53.0896	1.37532e-09	0.284507	0.525808	0.00591279	0.183772
53.3172	1.37538e-09	0.28447	0.525862	0.00592046	0.183748
53.5458	1.37544e-09	0.284433	0.525915	0.00592808	0.183724
53.7754	1.37551e-09	0.284396	0.525969	0.00593566	0.1837
54.0059	1.37557e-09	0.284358	0.526023	0.00594319	0.183675
54.2375	1.37612e-09	0.284695	0.525514	0.00594473	0.183846
54.47	1.37618e-09	0.284657	0.525569	0.00595259	0.183822
54.7036	1.37624e-09	0.284619	0.525624	0.00596041	0.183797
54.9381	1.3763e-09	0.28458	0.525679	0.00596817	0.183773
55.1736	1.37636e-09	0.284542	0.525734	0.00597589	0.183748
55.4102	1.37643e-09	0.284504	0.52579	0.00598356	0.183723
55.6478	1.37649e-09	0.284465	0.525846	0.00599119	0.183698
55.8864	1.37655e-09	0.284426	0.525902	0.00599876	0.183673
56.126	1.37661e-09	0.284387	0.525958	0.00600629	0.183648
56.3666	1.37718e-09	0.284719	0.525438	0.00600718	0.183836
56.6083	1.37724e-09	0.28468	0.525495	0.00601461	0.18381
56.851	1.37731e-09	0.284641	0.525552	0.006022	0.183785
57.0947	1.37737e-09	0.284601	0.52561	0.00602933	0.18376
57.3395	1.37743e-09	0.284562	0.525668	0.00603662	0.183734
57.5854	1.3775e-09	0.284522	0.525726	0.00604386	0.183708
57.8323	1.37756e-09	0.284482	0.525784	0.00605105	0.183683
58.0802	1.37763e-09	0.284442	0.525843	0.0060582	0.183657
58.3292	1.37769e-09	0.284402	0.525902	0.00606529	0.183631
58.5793	1.3783e-09	0.284761	0.525345	0.0060652	0.183829
58.8305	1.37836e-09	0.284721	0.525404	0.00607218	0.183803
59.0827	1.37843e-09	0.28468	0.525464	0.0060791	0.183777
59.336	1.37849e-09	0.284639	0.525524	0.00608598	0.18375
59.5904	1.37856e-09	0.284598	0.525585	0.00609281	0.183724
59.8459	1.37863e-09	0.284557	0.525646	0.00609959	0.183698
60.1025	1.37869e-09	0.284516	0.525707	0.00610632	0.183671
60.3602	1.37876e-09	0.284475	0.525768	0.006113	0.183644
60.619	1.37883e-09	0.284433	0.525829	0.00611963	0.183618
60.8789	1.37944e-09	0.284812	0.525261	0.0061193	0.183807
61.1399	1.37951e-09	0.28477	0.525323	0.00612626	0.18378
61.402	1.37958e-09	0.284728	0.525385	0.00613316	0.183753
61.6653	1.37965e-09	0.284686	0.525448	0.00614001	0.183726
61.9297	1.37972e-09	0.284643	0.525511	0.00614681	0.183699
62.1952	1.37979e-09	0.284601	0.525574	0.00615356	0.183671
62.4619	1.37985e-09	0.284558	0.525638	0.00616026	0.183644
62.7297	1.37992e-09	0.284515	0.525702	0.0061669	0.183616
62.9986	1.37999e-09	0.284472	0.525766	0.0061735	0.183588
63.2687	1.38063e-09	0.284862	0.525179	0.00617284	0.183786
63.54	1.3807e-09	0.284819	0.525244	0.00617978	0.183758
63.8124	1.38077e-09	0.284775	0.525309	0.00618666	0.18373
64.086	1.38084e-09	0.284731	0.525374	0.00619349	0.183701
64.3608	1.38092e-09	0.284687	0.525439	0.00620026	0.183673
64.6367	1.38099e-09	0.284643	0.525505	0.00620698	0.183645
64.9139	1.38106e-09	0.284599	0.525571	0.00621364	0.183616
65.1922	1.38113e-09	0.284555	0.525637	0.00622025	0.183588
65.4717	1.3812e-09	0.28451	0.525704	0.0062268	0.183559
65.7524	1.38187e-09	0.284908	0.525092	0.00622522	0.183775
66.0343	1.38194e-09	0.284863	0.525159	0.00623163	0.183746
66.3174	1.38202e-09	0.284818	0.525227	0.00623799	0.183717
66.6018	1.38209e-09	0.284773	0.525295	0.00624429	0.183688
66.8873	1.38216e-09	0.284728	0.525363	0.00625054	0.183659
67.1741	1.38224e-09	0.284682	0.525432	0.00625674	0.183629
67.4621	1.38231e-09	0.284636	0.525501	0.00626288	0.1836
67.7513	1.38238e-09	0.28459	0.52557	0.00626896	0.18357
68.0418	1.38246e-09	0.284544	0.52564	0.00627499	0.183541
68.3335	1.38315e-09	0.284967	0.525009	0.00627306	0.18375
68.6265	1.38322e-09	0.284921	0.525079	0.00627943	0.18372
68.9208	1.3833e-09	0.284874	0.52515	0.00628575	0.18369
69.2163	1.38337e-09	0.284827	0.52522	0.00629201	0.18366
69.513	1.38345e-09	0.28478	0.525292	0.00629822	0.18363
69.8111	1.38353e-09	0.284733	0.525363	0.00630436	0.1836
70.1104	1.3836e-09	0.284686	0.525435	0.00631045	0.183569
70.411	1.38368e-09	0.284638	0.525507	0.00631649	0.183538
70.7128	1.38376e-09	0.28459	0.525579	0.00632246	0.183508
71.016	1.38447e-09	0.285019	0.524926	0.00631959	0.183736
71.3205	1.38455e-09	0.284971	0.524999	0.00632539	0.183705
71.6263	1.38463e-09	0.284922	0.525073	0.00633114	0.183674
71.9334	1.38471e-09	0.284874	0.525147	0.00633683	0.183643
72.2418	1.38479e-09	0.284825	0.525221	0.00634247	0.183611
72.5515	1.38487e-09	0.284777	0.525296	0.00634805	0.18358
72.8626	1.38495e-09	0.284728	0.525371	0.00635357	0.183548
73.175	1.38502e-09	0.284678	0.525446	0.00635904	0.183517
73.4887	1.3851e-09	0.284629	0.525521	0.00636445	0.183485
73.8038	1.38586e-09	0.28509	0.524834	0.00636101	0.183715
74.1202	1.38594e-09	0.285041	0.52491	0.00636677	0.183683
74.438	1.38602e-09	0.284991	0.524986	0.00637246	0.183651
74.7572	1.3861e-09	0.28494	0.525063	0.00637809	0.183619
75.0777	1.38618e-09	0.28489	0.52514	0.00638367	0.183586
75.3996	1.38626e-09	0.284839	0.525218	0.00638919	0.183554
75.7229	1.38635e-09	0.284789	0.525296	0.00639465	0.183521
76.0475	1.38643e-09	0.284738	0.525374	0.00640005	0.183488
76.3736	1.38651e-09	0.284687	0.525453	0.00640539	0.183455
76.701	1.38729e-09	0.285166	0.524743	0.00640155	0.183689
77.0299	1.38737e-09	0.285114	0.524822	0.00640726	0.183656
77.3601	1.38746e-09	0.285063	0.524902	0.0064129	0.183623
77.6918	1.38754e-09	0.285011	0.524982	0.00641848	0.183589
78.0249	1.38763e-09	0.284958	0.525062	0.006424	0.183556
78.3595	1.38771e-09	0.284906	0.525143	0.00642946	0.183522
78.6954	1.3878e-09	0.284853	0.525224	0.00643486	0.183488
79.0328	1.38788e-09	0.284801	0.525305	0.0064402	0.183454
79.3717	1.38797e-09	0.284748	0.525387	0.00644547	0.18342
79.712	1.38876e-09	0.285221	0.524669	0.00644079	0.183669
80.0537	1.38885e-09	0.285168	0.524752	0.00644587	0.183634
80.397	1.38893e-09	0.285114	0.524835	0.00645088	0.1836
80.7417	1.38902e-09	0.285061	0.524918	0.00645583	0.183565
81.0878	1.38911e-09	0.285007	0.525002	0.00646073	0.183531
81.4355	1.3892e-09	0.284953	0.525086	0.00646556	0.183496
81.7847	1.38928e-09	0.284898	0.525171	0.00647034	0.183461
82.1353	1.38937e-09	0.284844	0.525255	0.00647505	0.183426
82.4875	1.38946e-09	0.284789	0.525341	0.00647971	0.183391
82.8411	1.39031e-09	0.285307	0.524571	0.00647424	0.183648
83.1963	1.3904e-09	0.285252	0.524657	0.00647926	0.183613
83.553	1.39049e-09	0.285196	0.524743	0.00648421	0.183577
83.9112	1.39058e-09	0.28514	0.524829	0.00648911	0.183541
84.271	1.39067e-09	0.285084	0.524917	0.00649394	0.183505
84.6323	1.39076e-09	0.285028	0.525004	0.00649871	0.183469
84.9952	1.39085e-09	0.284972	0.525092	0.00650342	0.183433
85.3596	1.39094e-09	0.284916	0.52518	0.00650806	0.183396
85.7256	1.39103e-09	0.284859	0.525269	0.00651265	0.18336
86.0931	1.3919e-09	0.28539	0.524484	0.00650685	0.183619
86.4622	1.39199e-09	0.285333	0.524573	0.00651182	0.183582
86.8329	1.39209e-09	0.285275	0.524663	0.00651672	0.183545
87.2052	1.39218e-09	0.285218	0.524753	0.00652156	0.183508
87.5791	1.39227e-09	0.28516	0.524843	0.00652633	0.183471
87.9546	1.39237e-09	0.285102	0.524934	0.00653104	0.183433
88.3317	1.39246e-09	0.285043	0.525025	0.00653568	0.183396
88.7104	1.39256e-09	0.284985	0.525117	0.00654026	0.183358
89.0908	1.39266e-09	0.284926	0.525209	0.00654478	0.183321
89.4728	1.39356e-09	0.285486	0.524384	0.00653834	0.183592
89.8564	1.39366e-09	0.285426	0.524476	0.00654327	0.183554
90.2416	1.39376e-09	0.285367	0.52457	0.00654813	0.183516
90.6285	1.39386e-09	0.285307	0.524663	0.00655292	0.183477
91.0171	1.39395e-09	0.285247	0.524757	0.00655764	0.183439
91.4073	1.39405e-09	0.285186	0.524851	0.0065623	0.1834
91.7992	1.39415e-09	0.285126	0.524946	0.00656688	0.183361
92.1928	1.39425e-09	0.285065	0.525041	0.00657141	0.183322
92.5881	1.39435e-09	0.285004	0.525137	0.00657586	0.183283
92.9851	1.39529e-09	0.28558	0.524288	0.006569	0.183564
93.3837	1.39539e-09	0.285518	0.524384	0.0065739	0.183524
93.7841	1.39549e-09	0.285456	0.524481	0.00657872	0.183484
94.1862	1.39559e-09	0.285394	0.524578	0.00658348	0.183444
94.59	1.39569e-09	0.285332	0.524676	0.00658816	0.183404
94.9956	1.39579e-09	0.285269	0.524774	0.00659278	0.183364
95.4029	1.39589e-09	0.285206	0.524872	0.00659732	0.183324
95.8119	1.396e-09	0.285143	0.524971	0.0066018	0.183284
96.2227	1.3961e-09	0.28508	0.525071	0.0066062	0.183243
96.6353	1.39707e-09	0.285679	0.524191	0.00659884	0.183531
97.0496	1.39718e-09	0.285615	0.524291	0.00660372	0.18349
97.4657	1.39728e-09	0.285551	0.524391	0.00660853	0.183449
97.8836	1.39739e-09	0.285486	0.524492	0.00661326	0.183408
98.3032	1.39749e-09	0.285422	0.524594	0.00661791	0.183366
98.7247	1.3976e-09	0.285357	0.524696	0.0066225	0.183325
99.148	1.3977e-09	0.285292	0.524798	0.00662701	0.183283
99.5731	1.39781e-09	0.285227	0.524901	0.00663144	0.183241
100	1.39792e-09	0.285161	0.525004	0.0066358	0.183199
100.111	1.39885e-09	0.285822	0.524014	0.00662406	0.18354
100.221	1.39888e-09	0.285805	0.524041	0.00662516	0.183529
100.332	1.39891e-09	0.285788	0.524068	0.00662625	0.183518
100.443	1.39893e-09	0.285771	0.524094	0.00662734	0.183508
100.554	1.39896e-09	0.285754	0.524121	0.00662843	0.183497
100.666	1.39899e-09	0.285737	0.524148	0.00662951	0.183486
100.777	1.39902e-09	0.285719	0.524175	0.00663058	0.183475
100.888	1.39904e-09	0.285702	0.524202	0.00663165	0.183464
101	1.39907e-09	0.285685	0.524229	0.00663272	0.183453
101.383	1.39941e-09	0.28581	0.524052	0.00663323	0.183506
101.768	1.39951e-09	0.285751	0.524145	0.0066371	0.183468
102.154	1.3996e-09	0.285691	0.524238	0.00664091	0.18343
102.542	1.3997e-09	0.285632	0.524332	0.00664466	0.183392
102.931	1.3998e-09	0.285572	0.524426	0.00664836	0.183353
103.322	1.39989e-09	0.285512	0.524521	0.006652	0.183315
103.714	1.39999e-09	0.285452	0.524615	0.00665558	0.183276
104.107	1.40009e-09	0.285392	0.524711	0.0066591	0.183238
104.503	1.40019e-09	0.285332	0.524806	0.00666257	0.183199
104.886	1.40112e-09	0.285909	0.523958	0.00665436	0.183479
105.271	1.40122e-09	0.28585	0.524051	0.00665804	0.183441
105.657	1.40132e-09	0.285791	0.524145	0.00666166	0.183403
106.045	1.40141e-09	0.285731	0.524238	0.00666523	0.183365
106.434	1.40151e-09	0.285672	0.524333	0.00666874	0.183327
106.825	1.40161e-09	0.285612	0.524427	0.0066722	0.183289
107.217	1.40171e-09	0.285552	0.524522	0.0066756	0.18325
107.61	1.4018e-09	0.285492	0.524617	0.00667894	0.183212
108.005	1.4019e-09	0.285432	0.524712	0.00668224	0.183173
108.389	1.40283e-09	0.286005	0.52387	0.00667387	0.183451
108.774	1.40293e-09	0.285946	0.523963	0.00667736	0.183413
109.16	1.40303e-09	0.285887	0.524056	0.0066808	0.183376
109.548	1.40312e-09	0.285828	0.52415	0.00668419	0.183338
109.937	1.40322e-09	0.285769	0.524244	0.00668752	0.1833
110.328	1.40332e-09	0.285709	0.524338	0.00669079	0.183262
110.719	1.40341e-09	0.285649	0.524433	0.00669402	0.183223
111.113	1.40351e-09	0.28559	0.524528	0.00669719	0.183185
111.508	1.40361e-09	0.28553	0.524624	0.00670031	0.183146
111.891	1.40455e-09	0.286106	0.523775	0.00669165	0.183427
112.277	1.40464e-09	0.286048	0.523868	0.00669496	0.18339
112.663	1.40474e-09	0.285989	0.523961	0.00669821	0.183352
113.051	1.40484e-09	0.28593	0.524055	0.00670142	0.183314
113.44	1.40493e-09	0.28587	0.524149	0.00670457	0.183276
113.83	1.40503e-09	0.285811	0.524243	0.00670767	0.183238
114.222	1.40513e-09	0.285751	0.524338	0.00671072	0.1832
114.615	1.40523e-09	0.285692	0.524433	0.00671372	0.183162
115.01	1.40533e-09	0.285632	0.524528	0.00671667	0.183123
115.394	1.40626e-09	0.286205	0.523686	0.00670789	0.183401
115.779	1.40635e-09	0.286147	0.523779	0.00671102	0.183363
116.166	1.40645e-09	0.286088	0.523872	0.0067141	0.183325
116.554	1.40655e-09	0.286029	0.523966	0.00671713	0.183288
116.943	1.40664e-09	0.28597	0.52406	0.00672011	0.18325
117.333	1.40674e-09	0.285911	0.524154	0.00672304	0.183212
117.725	1.40684e-09	0.285851	0.524249	0.00672592	0.183174
118.118	1.40693e-09	0.285792	0.524344	0.00672875	0.183136
118.513	1.40703e-09	0.285732	0.524439	0.00673154	0.183098
118.897	1.40796e-09	0.286299	0.523608	0.00672269	0.18337
119.282	1.40805e-09	0.28624	0.523701	0.00672564	0.183333
119.669	1.40815e-09	0.286181	0.523795	0.00672855	0.183296
120.057	1.40824e-09	0.286123	0.523888	0.00673141	0.183258
120.446	1.40834e-09	0.286064	0.523982	0.00673422	0.18322
120.836	1.40844e-09	0.286004	0.524076	0.00673698	0.183182
121.228	1.40854e-09	0.285945	0.524171	0.00673969	0.183144
121.621	1.40863e-09	0.285886	0.524266	0.00674236	0.183106
122.015	1.40873e-09	0.285826	0.524361	0.00674498	0.183068
122.399	1.40968e-09	0.286419	0.523506	0.00673625	0.183339
122.785	1.40977e-09	0.28636	0.523599	0.00673964	0.183302
123.172	1.40987e-09	0.286301	0.523692	0.00674298	0.183264
123.559	1.40996e-09	0.286243	0.523785	0.00674626	0.183226
123.949	1.41006e-09	0.286184	0.523878	0.00674949	0.183189
124.339	1.41016e-09	0.286124	0.523972	0.00675267	0.183151
124.731	1.41026e-09	0.286065	0.524066	0.0067558	0.183113
125.123	1.41035e-09	0.286006	0.524161	0.00675888	0.183075
125.518	1.41045e-09	0.285946	0.524255	0.0067619	0.183037
125.902	1.41138e-09	0.286517	0.523418	0.00675317	0.183312
126.288	1.41148e-09	0.286458	0.52351	0.00675639	0.183275
126.674	1.41158e-09	0.2864	0.523603	0.00675956	0.183238
127.062	1.41167e-09	0.286341	0.523696	0.00676267	0.1832
127.451	1.41177e-09	0.286282	0.52379	0.00676574	0.183162
127.842	1.41187e-09	0.286223	0.523884	0.00676875	0.183125
128.233	1.41196e-09	0.286164	0.523978	0.00677171	0.183087
128.626	1.41206e-09	0.286104	0.524072	0.00677462	0.183049
129.02	1.41216e-09	0.286045	0.524167	0.00677749	0.183011
129.405	1.41309e-09	0.286618	0.523325	0.00676851	0.183288
129.79	1.41319e-09	0.28656	0.523418	0.00677156	0.183251
130.177	1.41329e-09	0.286501	0.523511	0.00677456	0.183213
130.565	1.41338e-09	0.286443	0.523604	0.00677751	0.183176
130.954	1.41348e-09	0.286384	0.523697	0.00678041	0.183138
131.345	1.41358e-09	0.286325	0.523791	0.00678326	0.183101
131.736	1.41367e-09	0.286266	0.523885	0.00678607	0.183063
132.129	1.41377e-09	0.286207	0.523979	0.00678882	0.183025
132.523	1.41387e-09	0.286147	0.524074	0.00679153	0.182987
132.907	1.4148e-09	0.286713	0.523241	0.00678248	0.183264
133.293	1.41489e-09	0.286654	0.523334	0.00678536	0.183227
133.68	1.41499e-09	0.286596	0.523427	0.0067882	0.183189
134.068	1.41508e-09	0.286537	0.52352	0.00679099	0.183152
134.457	1.41518e-09	0.286479	0.523613	0.00679373	0.183114
134.847	1.41528e-09	0.28642	0.523707	0.00679643	0.183077
135.239	1.41538e-09	0.286361	0.523801	0.00679908	0.183039
135.631	1.41547e-09	0.286302	0.523895	0.00680168	0.183002
136.025	1.41557e-09	0.286243	0.523989	0.00680424	0.182964
136.41	1.4165e-09	0.28681	0.523157	0.00679501	0.183237
136.796	1.41659e-09	0.286752	0.52325	0.00679773	0.1832
137.183	1.41669e-09	0.286694	0.523343	0.0068004	0.183163
137.571	1.41679e-09	0.286635	0.523436	0.00680303	0.183126
137.96	1.41688e-09	0.286577	0.523529	0.00680562	0.183088
138.35	1.41698e-09	0.286518	0.523623	0.00680816	0.183051
138.741	1.41708e-09	0.286459	0.523716	0.00681065	0.183013
139.134	1.41717e-09	0.286401	0.523811	0.0068131	0.182976
139.528	1.41727e-09	0.286341	0.523905	0.00681551	0.182938
139.912	1.41821e-09	0.286915	0.523066	0.00680601	0.183213
140.298	1.4183e-09	0.286857	0.523159	0.00680857	0.183176
140.685	1.4184e-09	0.286799	0.523251	0.00681109	0.183139
141.073	1.4185e-09	0.28674	0.523344	0.00681357	0.183102
141.463	1.41859e-09	0.286682	0.523438	0.006816	0.183064
141.853	1.41869e-09	0.286623	0.523531	0.00681839	0.183027
142.244	1.41878e-09	0.286565	0.523625	0.00682073	0.18299
142.637	1.41888e-09	0.286506	0.523719	0.00682304	0.182952
143.03	1.41898e-09	0.286447	0.523813	0.0068253	0.182914
143.415	1.4199e-09	0.287005	0.522992	0.00681585	0.183187
143.801	1.42e-09	0.286947	0.523085	0.00681826	0.18315
144.188	1.42009e-09	0.286889	0.523177	0.00682063	0.183113
144.576	1.42019e-09	0.28683	0.52327	0.00682295	0.183076
144.965	1.42028e-09	0.286772	0.523363	0.00682523	0.183039
145.356	1.42038e-09	0.286714	0.523457	0.00682748	0.183002
145.747	1.42048e-09	0.286655	0.523551	0.00682968	0.182965
146.139	1.42057e-09	0.286597	0.523644	0.00683184	0.182927
146.533	1.42067e-09	0.286538	0.523739	0.00683395	0.18289
146.918	1.42161e-09	0.287121	0.5229	0.0068247	0.183154
147.304	1.4217e-09	0.287063	0.522992	0.00682754	0.183117
147.691	1.4218e-09	0.287005	0.523084	0.00683033	0.18308
148.079	1.4219e-09	0.286947	0.523177	0.00683307	0.183043
148.468	1.42199e-09	0.286889	0.52327	0.00683577	0.183006
148.858	1.42209e-09	0.28683	0.523363	0.00683842	0.182969
149.25	1.42219e-09	0.286772	0.523456	0.00684103	0.182931
149.642	1.42228e-09	0.286713	0.52355	0.00684358	0.182894
150.035	1.42238e-09	0.286654	0.523643	0.0068461	0.182856
150.42	1.42331e-09	0.287215	0.522819	0.00683685	0.18313
150.806	1.4234e-09	0.287157	0.522911	0.00683954	0.183093
151.194	1.4235e-09	0.287099	0.523003	0.00684218	0.183056
151.582	1.42359e-09	0.287041	0.523095	0.00684478	0.183019
151.971	1.42369e-09	0.286983	0.523188	0.00684733	0.182982
152.361	1.42379e-09	0.286924	0.523281	0.00684984	0.182945
152.752	1.42388e-09	0.286866	0.523374	0.0068523	0.182907
153.144	1.42398e-09	0.286807	0.523468	0.00685472	0.18287
153.538	1.42408e-09	0.286749	0.523562	0.0068571	0.182833
153.923	1.42501e-09	0.287317	0.522731	0.00684759	0.183105
154.309	1.42511e-09	0.287259	0.522823	0.00685013	0.183068
154.696	1.4252e-09	0.287201	0.522915	0.00685263	0.183031
155.084	1.4253e-09	0.287143	0.523007	0.00685508	0.182994
155.474	1.42539e-09	0.287085	0.5231	0.00685749	0.182957
155.864	1.42549e-09	0.287027	0.523193	0.00685985	0.18292
156.255	1.42559e-09	0.286969	0.523286	0.00686217	0.182883
156.647	1.42568e-09	0.28691	0.523379	0.00686445	0.182846
157.04	1.42578e-09	0.286852	0.523473	0.00686669	0.182809
157.425	1.42671e-09	0.287412	0.522651	0.00685714	0.183081
157.812	1.4268e-09	0.287354	0.522742	0.00685953	0.183044
158.199	1.4269e-09	0.287296	0.522835	0.00686188	0.183007
158.587	1.42699e-09	0.287238	0.522927	0.00686419	0.18297
158.976	1.42709e-09	0.28718	0.52302	0.00686645	0.182933
159.366	1.42719e-09	0.287122	0.523113	0.00686868	0.182897
159.758	1.42728e-09	0.287064	0.523206	0.00687086	0.182859
160.15	1.42738e-09	0.287006	0.523299	0.006873	0.182822
160.543	1.42748e-09	0.286947	0.523392	0.00687511	0.182785
160.928	1.42841e-09	0.287513	0.522567	0.00686535	0.183055
161.314	1.4285e-09	0.287455	0.522659	0.0068676	0.183018
161.702	1.4286e-09	0.287397	0.522751	0.00686981	0.182982
162.09	1.42869e-09	0.28734	0.522843	0.00687198	0.182945
162.479	1.42879e-09	0.287282	0.522936	0.0068741	0.182908
162.869	1.42889e-09	0.287224	0.523029	0.00687619	0.182871
163.26	1.42898e-09	0.287166	0.523122	0.00687824	0.182834
163.652	1.42908e-09	0.287107	0.523215	0.00688025	0.182797
164.045	1.42918e-09	0.287049	0.523308	0.00688222	0.18276
164.431	1.43011e-09	0.287621	0.522483	0.00687288	0.183023
164.817	1.4302e-09	0.287564	0.522574	0.00687556	0.182987
165.204	1.4303e-09	0.287506	0.522666	0.00687819	0.18295
165.593	1.43039e-09	0.287448	0.522758	0.00688077	0.182913
165.982	1.43049e-09	0.28739	0.52285	0.00688331	0.182876
166.372	1.43059e-09	0.287332	0.522943	0.0068858	0.18284
166.763	1.43068e-09	0.287274	0.523035	0.00688825	0.182803
167.155	1.43078e-09	0.287216	0.523128	0.00689066	0.182766
167.548	1.43088e-09	0.287157	0.523221	0.00689302	0.182728
167.933	1.43181e-09	0.287724	0.522395	0.00688351	0.182997
168.32	1.4319e-09	0.287666	0.522487	0.00688605	0.182961
168.707	1.432e-09	0.287609	0.522578	0.00688853	0.182924
169.095	1.4321e-09	0.287551	0.52267	0.00689098	0.182888
169.484	1.43219e-09	0.287493	0.522762	0.00689338	0.182851
169.874	1.43229e-09	0.287435	0.522855	0.00689574	0.182814
170.265	1.43238e-09	0.287377	0.522947	0.00689805	0.182777
170.657	1.43248e-09	0.287319	0.52304	0.00690033	0.18274
171.05	1.43258e-09	0.287261	0.523133	0.00690256	0.182703
171.436	1.4335e-09	0.287814	0.522321	0.00689308	0.182972
171.822	1.43359e-09	0.287757	0.522413	0.00689548	0.182935
172.21	1.43369e-09	0.287699	0.522504	0.00689783	0.182899
172.598	1.43378e-09	0.287642	0.522596	0.00690014	0.182862
172.987	1.43388e-09	0.287584	0.522688	0.00690241	0.182825
173.377	1.43398e-09	0.287526	0.522781	0.00690464	0.182789
173.768	1.43407e-09	0.287468	0.522873	0.00690683	0.182752
174.16	1.43417e-09	0.28741	0.522966	0.00690898	0.182715
174.553	1.43427e-09	0.287352	0.523059	0.00691109	0.182678
174.938	1.4352e-09	0.287915	0.522234	0.00690129	0.18295
175.325	1.43529e-09	0.287858	0.522325	0.00690355	0.182914
175.712	1.43539e-09	0.2878	0.522417	0.00690577	0.182877
176.101	1.43549e-09	0.287743	0.522509	0.00690795	0.182841
176.49	1.43558e-09	0.287685	0.522601	0.00691009	0.182804
176.88	1.43568e-09	0.287627	0.522693	0.00691219	0.182768
177.271	1.43577e-09	0.28757	0.522785	0.00691426	0.182731
177.662	1.43587e-09	0.287512	0.522878	0.00691628	0.182694
178.055	1.43597e-09	0.287454	0.522971	0.00691826	0.182657
178.441	1.43689e-09	0.288021	0.522153	0.00690897	0.182917
178.828	1.43699e-09	0.287964	0.522244	0.00691165	0.182881
179.215	1.43709e-09	0.287906	0.522335	0.00691428	0.182844
179.603	1.43718e-09	0.287849	0.522427	0.00691687	0.182808
179.992	1.43728e-09	0.287791	0.522518	0.00691942	0.182771
180.382	1.43737e-09	0.287733	0.52261	0.00692192	0.182735
180.773	1.43747e-09	0.287675	0.522702	0.00692437	0.182698
181.165	1.43757e-09	0.287617	0.522795	0.00692679	0.182661
181.558	1.43766e-09	0.287559	0.522887	0.00692916	0.182624
181.943	1.43859e-09	0.288123	0.522065	0.00691966	0.182892
182.33	1.43869e-09	0.288066	0.522156	0.0069222	0.182856
182.718	1.43879e-09	0.288008	0.522248	0.00692471	0.182819
183.106	1.43888e-09	0.287951	0.522339	0.00692717	0.182783
183.495	1.43898e-09	0.287893	0.522431	0.00692958	0.182747
183.885	1.43907e-09	0.287836	0.522522	0.00693196	0.18271
184.276	1.43917e-09	0.287778	0.522614	0.00693429	0.182673
184.668	1.43927e-09	0.28772	0.522707	0.00693658	0.182637
185.06	1.43936e-09	0.287662	0.522799	0.00693882	0.1826
185.446	1.44029e-09	0.28822	0.521982	0.00692924	0.182869
185.833	1.44039e-09	0.288163	0.522073	0.00693166	0.182832
186.22	1.44048e-09	0.288105	0.522165	0.00693404	0.182796
186.609	1.44058e-09	0.288048	0.522256	0.00693637	0.18276
186.998	1.44067e-09	0.287991	0.522347	0.00693866	0.182723
187.388	1.44077e-09	0.287933	0.522439	0.00694091	0.182687
187.779	1.44086e-09	0.287875	0.522531	0.00694312	0.18265
188.17	1.44096e-09	0.287818	0.522623	0.00694529	0.182614
188.563	1.44106e-09	0.28776	0.522715	0.00694742	0.182577
188.949	1.44198e-09	0.28831	0.52191	0.00693785	0.182842
189.335	1.44207e-09	0.288253	0.522001	0.00694014	0.182806
189.723	1.44217e-09	0.288196	0.522092	0.00694239	0.18277
190.111	1.44226e-09	0.288139	0.522183	0.0069446	0.182733
190.5	1.44236e-09	0.288081	0.522275	0.00694677	0.182697
190.89	1.44245e-09	0.288024	0.522367	0.0069489	0.182661
191.281	1.44255e-09	0.287966	0.522458	0.00695099	0.182624
191.673	1.44265e-09	0.287909	0.52255	0.00695304	0.182588
192.065	1.44274e-09	0.287851	0.522643	0.00695505	0.182551
192.451	1.44367e-09	0.288406	0.521831	0.00694526	0.182817
192.838	1.44376e-09	0.288349	0.521922	0.00694743	0.182781
193.226	1.44386e-09	0.288292	0.522013	0.00694956	0.182745
193.614	1.44395e-09	0.288235	0.522105	0.00695165	0.182709
194.003	1.44405e-09	0.288178	0.522196	0.0069537	0.182673
194.393	1.44415e-09	0.28812	0.522287	0.00695571	0.182637
194.784	1.44424e-09	0.288063	0.522379	0.00695769	0.1826
195.175	1.44434e-09	0.288005	0.522471	0.00695962	0.182564
195.568	1.44443e-09	0.287948	0.522563	0.00696152	0.182527
195.954	1.44537e-09	0.288519	0.52174	0.00695198	0.182789
196.341	1.44547e-09	0.288462	0.521831	0.00695457	0.182753
196.728	1.44556e-09	0.288405	0.521921	0.0069571	0.182716
197.117	1.44566e-09	0.288348	0.522012	0.0069596	0.18268
197.506	1.44575e-09	0.288291	0.522103	0.00696205	0.182644
197.896	1.44585e-09	0.288233	0.522194	0.00696446	0.182608
198.286	1.44594e-09	0.288176	0.522286	0.00696682	0.182571
198.678	1.44604e-09	0.288118	0.522377	0.00696914	0.182535
199.07	1.44614e-09	0.288061	0.522469	0.00697142	0.182499
199.456	1.44706e-09	0.288611	0.521663	0.00696197	0.182763
199.843	1.44716e-09	0.288555	0.521754	0.00696443	0.182727
200.231	1.44725e-09	0.288498	0.521844	0.00696684	0.182691
200.619	1.44735e-09	0.28844	0.521935	0.00696922	0.182655
201.008	1.44744e-09	0.288383	0.522026	0.00697155	0.182619
201.398	1.44754e-09	0.288326	0.522117	0.00697384	0.182583
201.789	1.44763e-09	0.288269	0.522208	0.00697609	0.182547
202.18	1.44773e-09	0.288211	0.5223	0.0069783	0.18251
202.573	1.44783e-09	0.288154	0.522392	0.00698047	0.182474
202.959	1.44876e-09	0.28871	0.521579	0.00697079	0.18274
203.346	1.44885e-09	0.288653	0.521669	0.00697313	0.182704
203.733	1.44895e-09	0.288596	0.52176	0.00697543	0.182668
204.122	1.44904e-09	0.288539	0.521851	0.00697769	0.182632
204.511	1.44914e-09	0.288482	0.521942	0.00697991	0.182596
204.901	1.44923e-09	0.288425	0.522033	0.00698208	0.18256
205.292	1.44933e-09	0.288368	0.522124	0.00698422	0.182524
205.683	1.44942e-09	0.288311	0.522215	0.00698632	0.182488
206.075	1.44952e-09	0.288253	0.522307	0.00698838	0.182452
206.461	1.45045e-09	0.288805	0.5215	0.00697864	0.182717
206.848	1.45054e-09	0.288748	0.52159	0.00698087	0.182681
207.236	1.45064e-09	0.288691	0.521681	0.00698305	0.182645
207.624	1.45073e-09	0.288635	0.521771	0.0069852	0.182609
208.014	1.45083e-09	0.288578	0.521862	0.00698731	0.182573
208.404	1.45092e-09	0.288521	0.521953	0.00698937	0.182537
208.794	1.45102e-09	0.288464	0.522044	0.0069914	0.182501
209.185	1.45111e-09	0.288406	0.522136	0.00699339	0.182465
209.578	1.45121e-09	0.288349	0.522227	0.00699535	0.182428
209.964	1.45213e-09	0.288896	0.521429	0.0069856	0.182689
210.351	1.45222e-09	0.288839	0.52152	0.00698772	0.182653
210.739	1.45232e-09	0.288783	0.52161	0.00698979	0.182618
211.127	1.45241e-09	0.288726	0.521701	0.00699182	0.182582
211.516	1.45251e-09	0.288669	0.521791	0.00699382	0.182546
211.906	1.4526e-09	0.288612	0.521882	0.00699578	0.18251
212.297	1.4527e-09	0.288555	0.521973	0.0069977	0.182474
212.688	1.45279e-09	0.288498	0.522064	0.00699959	0.182438
213.08	1.45289e-09	0.288441	0.522156	0.00700144	0.182402
213.466	1.45383e-09	0.28901	0.521338	0.00699182	0.182661
213.853	1.45392e-09	0.288953	0.521427	0.00699434	0.182625
214.241	1.45402e-09	0.288896	0.521518	0.00699681	0.182589
214.63	1.45411e-09	0.28884	0.521608	0.00699925	0.182553
215.019	1.45421e-09	0.288783	0.521698	0.00700164	0.182517
215.409	1.45431e-09	0.288726	0.521789	0.00700398	0.182481
215.799	1.4544e-09	0.288669	0.521879	0.00700629	0.182445
216.191	1.4545e-09	0.288612	0.52197	0.00700855	0.182409
216.583	1.45459e-09	0.288555	0.522061	0.00701078	0.182373
216.969	1.45552e-09	0.289106	0.521256	0.00700121	0.182637
217.356	1.45562e-09	0.289049	0.521346	0.00700361	0.182601
217.744	1.45571e-09	0.288992	0.521436	0.00700598	0.182566
218.132	1.45581e-09	0.288936	0.521526	0.0070083	0.18253
218.521	1.4559e-09	0.288879	0.521616	0.00701058	0.182494
218.911	1.456e-09	0.288822	0.521707	0.00701283	0.182458
219.302	1.45609e-09	0.288765	0.521798	0.00701503	0.182422
219.693	1.45619e-09	0.288708	0.521888	0.00701719	0.182386
220.085	1.45628e-09	0.288651	0.521979	0.00701931	0.18235
220.472	1.4572e-09	0.289193	0.521185	0.00700976	0.182613
220.859	1.4573e-09	0.289136	0.521275	0.00701206	0.182577
221.246	1.45739e-09	0.28908	0.521365	0.00701431	0.182541
221.635	1.45749e-09	0.289023	0.521455	0.00701653	0.182506
222.024	1.45758e-09	0.288966	0.521545	0.00701871	0.18247
222.414	1.45768e-09	0.28891	0.521635	0.00702084	0.182434
222.804	1.45777e-09	0.288853	0.521726	0.00702294	0.182398
223.196	1.45787e-09	0.288796	0.521817	0.007025	0.182362
223.588	1.45796e-09	0.288739	0.521908	0.00702702	0.182326
223.974	1.45889e-09	0.289288	0.521105	0.00701724	0.182589
224.361	1.45899e-09	0.289232	0.521195	0.00701943	0.182554
224.749	1.45908e-09	0.289176	0.521285	0.00702158	0.182518
225.138	1.45918e-09	0.289119	0.521375	0.0070237	0.182483
225.527	1.45927e-09	0.289062	0.521465	0.00702577	0.182447
225.917	1.45937e-09	0.289006	0.521555	0.0070278	0.182411
226.307	1.45946e-09	0.288949	0.521646	0.0070298	0.182375
226.698	1.45956e-09	0.288892	0.521736	0.00703176	0.18234
227.09	1.45965e-09	0.288835	0.521827	0.00703369	0.182304
227.477	1.46058e-09	0.289385	0.521027	0.00702382	0.182565
227.864	1.46067e-09	0.289328	0.521117	0.00702591	0.182529
228.252	1.46077e-09	0.289272	0.521206	0.00702796	0.182494
228.64	1.46086e-09	0.289216	0.521296	0.00702997	0.182458
229.029	1.46096e-09	0.289159	0.521386	0.00703194	0.182422
229.419	1.46105e-09	0.289103	0.521477	0.00703388	0.182387
229.81	1.46115e-09	0.289046	0.521567	0.00703578	0.182351
230.201	1.46124e-09	0.288989	0.521658	0.00703764	0.182315
230.593	1.46134e-09	0.288933	0.521748	0.00703947	0.18228
230.979	1.46227e-09	0.289495	0.52094	0.0070299	0.182534
231.366	1.46237e-09	0.289439	0.52103	0.00703238	0.182499
231.754	1.46246e-09	0.289383	0.521119	0.00703483	0.182463
232.143	1.46256e-09	0.289326	0.521209	0.00703723	0.182428
232.532	1.46265e-09	0.28927	0.521299	0.00703959	0.182392
232.922	1.46275e-09	0.289213	0.521388	0.0070419	0.182357
233.312	1.46284e-09	0.289156	0.521479	0.00704418	0.182321
233.703	1.46294e-09	0.2891	0.521569	0.00704642	0.182285
234.095	1.46304e-09	0.289043	0.521659	0.00704861	0.182249
234.482	1.46396e-09	0.289584	0.520866	0.00703912	0.182511
234.869	1.46405e-09	0.289527	0.520956	0.00704151	0.182475
235.257	1.46414e-09	0.289471	0.521045	0.00704385	0.18244
235.645	1.46424e-09	0.289415	0.521135	0.00704615	0.182405
236.035	1.46434e-09	0.289358	0.521224	0.00704842	0.182369
236.424	1.46443e-09	0.289302	0.521314	0.00705064	0.182333
236.815	1.46453e-09	0.289245	0.521404	0.00705282	0.182298
237.206	1.46462e-09	0.289189	0.521494	0.00705496	0.182262
237.598	1.46472e-09	0.289132	0.521584	0.00705706	0.182227
237.984	1.46564e-09	0.289676	0.520792	0.00704746	0.182485
238.372	1.46573e-09	0.28962	0.520881	0.00704974	0.18245
238.759	1.46583e-09	0.289563	0.52097	0.00705199	0.182414
239.148	1.46592e-09	0.289507	0.52106	0.00705419	0.182379
239.537	1.46602e-09	0.289451	0.521149	0.00705636	0.182343
239.927	1.46611e-09	0.289395	0.521239	0.00705848	0.182308
240.317	1.46621e-09	0.289338	0.521329	0.00706057	0.182272
240.708	1.4663e-09	0.289282	0.521419	0.00706262	0.182237
241.1	1.4664e-09	0.289225	0.521509	0.00706463	0.182201
241.487	1.46733e-09	0.289776	0.520705	0.00705475	0.182464
241.874	1.46743e-09	0.28972	0.520794	0.00705693	0.182429
242.262	1.46752e-09	0.289664	0.520883	0.00705908	0.182394
242.651	1.46762e-09	0.289608	0.520972	0.00706119	0.182358
243.04	1.46771e-09	0.289552	0.521062	0.00706326	0.182323
243.429	1.46781e-09	0.289496	0.521152	0.00706529	0.182287
243.82	1.4679e-09	0.289439	0.521241	0.00706729	0.182252
244.211	1.468e-09	0.289383	0.521331	0.00706924	0.182217
244.603	1.46809e-09	0.289326	0.521421	0.00707116	0.182181
244.989	1.46901e-09	0.289862	0.520639	0.00706148	0.182438
245.377	1.4691e-09	0.289806	0.520728	0.00706357	0.182403
245.765	1.46919e-09	0.28975	0.520817	0.00706562	0.182368
246.153	1.46929e-09	0.289693	0.520907	0.00706764	0.182332
246.542	1.46938e-09	0.289637	0.520996	0.00706962	0.182297
246.932	1.46948e-09	0.289581	0.521086	0.00707156	0.182262
247.322	1.46957e-09	0.289525	0.521175	0.00707346	0.182226
247.713	1.46967e-09	0.289469	0.521265	0.00707533	0.182191
248.105	1.46977e-09	0.289412	0.521355	0.00707717	0.182155
248.492	1.4707e-09	0.289975	0.520548	0.00706754	0.182409
248.879	1.4708e-09	0.289919	0.520637	0.00707002	0.182374
249.267	1.47089e-09	0.289863	0.520726	0.00707246	0.182339
249.656	1.47099e-09	0.289807	0.520815	0.00707486	0.182304
250.045	1.47108e-09	0.289751	0.520904	0.00707722	0.182268
250.435	1.47118e-09	0.289694	0.520993	0.00707954	0.182233
250.825	1.47127e-09	0.289638	0.521083	0.00708182	0.182198
251.216	1.47137e-09	0.289582	0.521172	0.00708405	0.182162
251.608	1.47146e-09	0.289525	0.521262	0.00708625	0.182127
251.994	1.47238e-09	0.290064	0.520473	0.00707676	0.182386
252.382	1.47248e-09	0.290008	0.520562	0.00707915	0.182351
252.77	1.47257e-09	0.289952	0.520651	0.0070815	0.182316
253.158	1.47267e-09	0.289896	0.52074	0.00708381	0.182281
253.547	1.47276e-09	0.28984	0.520829	0.00708608	0.182245
253.937	1.47286e-09	0.289784	0.520918	0.00708831	0.18221
254.328	1.47295e-09	0.289728	0.521007	0.0070905	0.182175
254.719	1.47305e-09	0.289671	0.521097	0.00709265	0.18214
255.11	1.47314e-09	0.289615	0.521186	0.00709476	0.182104
255.497	1.47407e-09	0.290157	0.520397	0.00708515	0.18236
255.884	1.47416e-09	0.290102	0.520486	0.00708745	0.182325
256.272	1.47426e-09	0.290046	0.520574	0.00708971	0.18229
256.661	1.47435e-09	0.28999	0.520663	0.00709193	0.182255
257.05	1.47445e-09	0.289934	0.520752	0.00709411	0.18222
257.44	1.47454e-09	0.289878	0.520841	0.00709625	0.182185
257.83	1.47464e-09	0.289822	0.52093	0.00709835	0.18215
258.221	1.47473e-09	0.289766	0.52102	0.00710041	0.182114
258.613	1.47483e-09	0.289709	0.521109	0.00710244	0.182079
258.999	1.47575e-09	0.290247	0.520323	0.00709276	0.182337
259.387	1.47584e-09	0.290191	0.520411	0.00709497	0.182302
259.775	1.47594e-09	0.290136	0.5205	0.00709714	0.182267
260.163	1.47603e-09	0.29008	0.520589	0.00709927	0.182232
260.553	1.47613e-09	0.290024	0.520678	0.00710137	0.182197
260.942	1.47622e-09	0.289968	0.520767	0.00710342	0.182162
261.333	1.47632e-09	0.289912	0.520856	0.00710544	0.182127
261.724	1.47641e-09	0.289856	0.520945	0.00710742	0.182092
262.115	1.47651e-09	0.2898	0.521034	0.00710937	0.182057
262.502	1.47743e-09	0.290342	0.520245	0.00709955	0.182313
262.889	1.47752e-09	0.290287	0.520334	0.00710167	0.182278
263.277	1.47762e-09	0.290231	0.520422	0.00710376	0.182243
263.666	1.47771e-09	0.290175	0.520511	0.0071058	0.182208
264.055	1.47781e-09	0.290119	0.5206	0.00710781	0.182173
264.445	1.4779e-09	0.290064	0.520689	0.00710979	0.182138
264.835	1.478e-09	0.290008	0.520778	0.00711172	0.182103
265.226	1.47809e-09	0.289952	0.520867	0.00711362	0.182068
265.618	1.47819e-09	0.289896	0.520956	0.00711549	0.182033
266.005	1.47912e-09	0.290448	0.520161	0.00710598	0.182285
266.392	1.47921e-09	0.290392	0.520249	0.00710849	0.18225
266.78	1.47931e-09	0.290336	0.520337	0.00711096	0.182215
267.169	1.4794e-09	0.29028	0.520426	0.00711339	0.18218
267.558	1.4795e-09	0.290225	0.520514	0.00711577	0.182145
267.948	1.47959e-09	0.290169	0.520603	0.00711811	0.18211
268.338	1.47969e-09	0.290113	0.520692	0.00712042	0.182075
268.729	1.47978e-09	0.290057	0.52078	0.00712268	0.18204
269.12	1.47988e-09	0.290001	0.520869	0.0071249	0.182005
269.507	1.4808e-09	0.290538	0.520084	0.00711543	0.182262
269.895	1.4809e-09	0.290482	0.520172	0.00711785	0.182227
270.283	1.48099e-09	0.290427	0.520261	0.00712024	0.182192
270.671	1.48108e-09	0.290371	0.520349	0.00712258	0.182158
271.06	1.48118e-09	0.290315	0.520437	0.00712488	0.182123
271.45	1.48127e-09	0.290259	0.520526	0.00712714	0.182088
271.84	1.48137e-09	0.290204	0.520614	0.00712937	0.182053
272.231	1.48146e-09	0.290148	0.520703	0.00713155	0.182018
272.623	1.48156e-09	0.290092	0.520792	0.00713369	0.181983
273.01	1.48248e-09	0.290634	0.520004	0.00712408	0.182238
273.397	1.48258e-09	0.290578	0.520092	0.00712642	0.182203
273.785	1.48267e-09	0.290523	0.52018	0.00712872	0.182168
274.174	1.48277e-09	0.290467	0.520269	0.00713098	0.182133
274.563	1.48286e-09	0.290411	0.520357	0.0071332	0.182099
274.953	1.48296e-09	0.290356	0.520445	0.00713538	0.182064
275.343	1.48305e-09	0.2903	0.520534	0.00713752	0.182029
275.734	1.48315e-09	0.290244	0.520623	0.00713963	0.181994
276.125	1.48324e-09	0.290188	0.520711	0.00714169	0.181959
276.512	1.48416e-09	0.29072	0.519935	0.00713213	0.182213
276.9	1.48425e-09	0.290665	0.520023	0.00713439	0.182178
277.288	1.48435e-09	0.290609	0.520111	0.00713661	0.182143
277.676	1.48444e-09	0.290554	0.520199	0.00713879	0.182109
278.066	1.48454e-09	0.290498	0.520287	0.00714093	0.182074
278.455	1.48463e-09	0.290443	0.520375	0.00714303	0.182039
278.845	1.48473e-09	0.290387	0.520464	0.0071451	0.182004
279.236	1.48482e-09	0.290331	0.520552	0.00714713	0.181969
279.628	1.48492e-09	0.290275	0.520641	0.00714912	0.181934
280.015	1.48584e-09	0.290814	0.519855	0.00713933	0.182192
280.402	1.48594e-09	0.290758	0.519942	0.00714151	0.182158
280.79	1.48603e-09	0.290703	0.52003	0.00714365	0.182123
281.179	1.48613e-09	0.290648	0.520118	0.00714575	0.182088
281.568	1.48622e-09	0.290592	0.520206	0.00714782	0.182054
281.958	1.48632e-09	0.290537	0.520295	0.00714984	0.182019
282.348	1.48641e-09	0.290481	0.520383	0.00715184	0.181984
282.739	1.4865e-09	0.290425	0.520472	0.00715379	0.181949
283.13	1.4866e-09	0.29037	0.52056	0.00715571	0.181915
283.517	1.48753e-09	0.290913	0.519772	0.00714581	0.182169
283.905	1.48762e-09	0.290858	0.51986	0.00714791	0.182134
284.293	1.48772e-09	0.290803	0.519948	0.00714997	0.1821
284.681	1.48781e-09	0.290747	0.520036	0.007152	0.182065
285.071	1.48791e-09	0.290692	0.520124	0.00715399	0.182031
285.46	1.488e-09	0.290636	0.520212	0.00715594	0.181996
285.851	1.4881e-09	0.290581	0.5203	0.00715786	0.181961
286.241	1.48819e-09	0.290525	0.520388	0.00715975	0.181926
286.633	1.48828e-09	0.29047	0.520477	0.00716159	0.181892
287.02	1.4892e-09	0.291011	0.5197	0.00715222	0.182137
287.407	1.4893e-09	0.290956	0.519787	0.0071547	0.182102
287.795	1.48939e-09	0.2909	0.519875	0.00715714	0.182068
288.184	1.48949e-09	0.290845	0.519962	0.00715954	0.182033
288.573	1.48958e-09	0.29079	0.52005	0.00716189	0.181998
288.963	1.48968e-09	0.290734	0.520138	0.00716421	0.181964
289.353	1.48977e-09	0.290679	0.520226	0.00716649	0.181929
289.744	1.48987e-09	0.290623	0.520314	0.00716872	0.181894
290.135	1.48996e-09	0.290567	0.520402	0.00717092	0.181859
290.522	1.49088e-09	0.291101	0.519623	0.00716143	0.182114
290.91	1.49098e-09	0.291046	0.519711	0.00716383	0.18208
291.298	1.49107e-09	0.29099	0.519798	0.0071662	0.182045
291.687	1.49117e-09	0.290935	0.519886	0.00716852	0.182011
292.076	1.49126e-09	0.29088	0.519973	0.0071708	0.181976
292.465	1.49136e-09	0.290824	0.520061	0.00717305	0.181942
292.856	1.49145e-09	0.290769	0.520149	0.00717525	0.181907
293.246	1.49155e-09	0.290713	0.520237	0.00717742	0.181872
293.638	1.49164e-09	0.290658	0.520325	0.00717955	0.181838
294.025	1.49256e-09	0.291191	0.519547	0.00716998	0.182092
294.412	1.49266e-09	0.291136	0.519634	0.00717231	0.182057
294.801	1.49275e-09	0.291081	0.519722	0.0071746	0.182023
295.189	1.49285e-09	0.291026	0.519809	0.00717685	0.181988
295.578	1.49294e-09	0.29097	0.519897	0.00717906	0.181954
295.968	1.49303e-09	0.290915	0.519984	0.00718124	0.181919
296.358	1.49313e-09	0.29086	0.520072	0.00718337	0.181885
296.749	1.49322e-09	0.290804	0.52016	0.00718547	0.18185
297.14	1.49332e-09	0.290749	0.520248	0.00718753	0.181816
297.527	1.49424e-09	0.29128	0.519474	0.00717793	0.182068
297.915	1.49433e-09	0.291225	0.519561	0.00718019	0.182034
298.303	1.49443e-09	0.29117	0.519648	0.00718241	0.182
298.692	1.49452e-09	0.291115	0.519736	0.00718459	0.181965
299.081	1.49461e-09	0.291059	0.519823	0.00718673	0.181931
299.471	1.49471e-09	0.291004	0.519911	0.00718883	0.181896
299.861	1.4948e-09	0.290949	0.519998	0.0071909	0.181862
300.251	1.4949e-09	0.290894	0.520086	0.00719293	0.181827
300.643	1.49499e-09	0.290838	0.520174	0.00719493	0.181793
301.03	1.49591e-09	0.291367	0.519404	0.00718529	0.182044
301.417	1.496e-09	0.291312	0.519491	0.00718748	0.182009
301.806	1.4961e-09	0.291257	0.519578	0.00718963	0.181975
302.194	1.49619e-09	0.291202	0.519665	0.00719174	0.181941
302.583	1.49629e-09	0.291147	0.519753	0.00719381	0.181906
302.973	1.49638e-09	0.291092	0.51984	0.00719585	0.181872
303.363	1.49648e-09	0.291037	0.519928	0.00719785	0.181838
303.754	1.49657e-09	0.290982	0.520015	0.00719982	0.181803
304.145	1.49667e-09	0.290926	0.520103	0.00720175	0.181769
304.532	1.49759e-09	0.291463	0.51932	0.00719186	0.182025
304.92	1.49769e-09	0.291408	0.519407	0.00719398	0.18199
305.308	1.49778e-09	0.291353	0.519494	0.00719606	0.181956
305.697	1.49788e-09	0.291298	0.519582	0.00719811	0.181922
306.086	1.49797e-09	0.291243	0.519669	0.00720012	0.181888
306.476	1.49807e-09	0.291188	0.519756	0.00720209	0.181853
306.866	1.49816e-09	0.291133	0.519844	0.00720403	0.181819
307.256	1.49825e-09	0.291078	0.519931	0.00720593	0.181784
307.648	1.49835e-09	0.291023	0.520019	0.0072078	0.18175
308.035	1.49927e-09	0.291563	0.519246	0.00719842	0.181993
308.423	1.49936e-09	0.291508	0.519333	0.00720091	0.181958
308.811	1.49946e-09	0.291453	0.51942	0.00720336	0.181924
309.199	1.49955e-09	0.291398	0.519507	0.00720577	0.18189
309.589	1.49965e-09	0.291343	0.519594	0.00720814	0.181855
309.978	1.49974e-09	0.291288	0.519681	0.00721047	0.181821
310.368	1.49984e-09	0.291232	0.519768	0.00721276	0.181787
310.759	1.49993e-09	0.291177	0.519855	0.00721501	0.181752
311.15	1.50003e-09	0.291122	0.519943	0.00721723	0.181718
311.537	1.50095e-09	0.291653	0.51917	0.00720776	0.18197
311.925	1.50104e-09	0.291598	0.519256	0.00721018	0.181935
312.313	1.50113e-09	0.291543	0.519343	0.00721257	0.181901
312.702	1.50123e-09	0.291488	0.51943	0.00721491	0.181867
313.091	1.50132e-09	0.291433	0.519517	0.00721721	0.181833
313.481	1.50142e-09	0.291378	0.519604	0.00721948	0.181799
313.871	1.50151e-09	0.291323	0.519691	0.00722171	0.181764
314.262	1.50161e-09	0.291268	0.519778	0.00722389	0.18173
314.653	1.5017e-09	0.291213	0.519866	0.00722604	0.181696
315.04	1.50262e-09	0.291743	0.519093	0.0072165	0.181947
315.428	1.50272e-09	0.291688	0.519179	0.00721886	0.181913
315.816	1.50281e-09	0.291634	0.519266	0.00722118	0.181879
316.205	1.50291e-09	0.291579	0.519353	0.00722346	0.181845
316.594	1.503e-09	0.291524	0.51944	0.0072257	0.181811
316.983	1.50309e-09	0.291469	0.519526	0.0072279	0.181777
317.373	1.50319e-09	0.291414	0.519614	0.00723007	0.181742
317.764	1.50328e-09	0.291359	0.519701	0.00723219	0.181708
318.155	1.50338e-09	0.291304	0.519788	0.00723428	0.181674
318.542	1.5043e-09	0.291833	0.519018	0.0072247	0.181924
318.93	1.50439e-09	0.291779	0.519105	0.00722699	0.18189
319.318	1.50449e-09	0.291724	0.519191	0.00722925	0.181856
319.707	1.50458e-09	0.291669	0.519278	0.00723146	0.181822
320.096	1.50468e-09	0.291614	0.519364	0.00723364	0.181788
320.486	1.50477e-09	0.291559	0.519451	0.00723578	0.181753
320.876	1.50486e-09	0.291505	0.519538	0.00723788	0.181719
321.267	1.50496e-09	0.29145	0.519625	0.00723995	0.181685
321.658	1.50505e-09	0.291395	0.519712	0.00724198	0.181651
322.045	1.50609e-09	0.292089	0.518821	0.00723081	0.181859
322.433	1.50619e-09	0.292034	0.518907	0.00723322	0.181825
322.821	1.50628e-09	0.291979	0.518994	0.00723558	0.181791
323.21	1.50637e-09	0.291925	0.51908	0.00723791	0.181757
323.599	1.50647e-09	0.29187	0.519167	0.00724021	0.181723
323.988	1.50656e-09	0.291815	0.519253	0.00724246	0.181689
324.379	1.50666e-09	0.29176	0.51934	0.00724467	0.181655
324.769	1.50675e-09	0.291705	0.519427	0.00724685	0.181621
325.16	1.50685e-09	0.29165	0.519514	0.00724899	0.181587
325.547	1.50777e-09	0.292178	0.518746	0.00723946	0.181836
325.935	1.50786e-09	0.292124	0.518833	0.00724181	0.181802
326.323	1.50795e-09	0.292069	0.518919	0.00724412	0.181768
326.712	1.50805e-09	0.292014	0.519005	0.00724639	0.181734
327.101	1.50814e-09	0.29196	0.519092	0.00724862	0.1817
327.491	1.50824e-09	0.291905	0.519178	0.00725082	0.181666
327.881	1.50833e-09	0.29185	0.519265	0.00725297	0.181632
328.272	1.50843e-09	0.291795	0.519352	0.00725509	0.181598
328.663	1.50852e-09	0.291741	0.519439	0.00725718	0.181564
329.05	1.50944e-09	0.292269	0.51867	0.00724756	0.181813
329.438	1.50954e-09	0.292215	0.518756	0.00724985	0.181779
329.826	1.50963e-09	0.29216	0.518842	0.0072521	0.181746
330.215	1.50972e-09	0.292106	0.518928	0.00725431	0.181712
330.604	1.50982e-09	0.292051	0.519015	0.00725648	0.181678
330.994	1.50991e-09	0.291996	0.519101	0.00725862	0.181644
331.384	1.51001e-09	0.291942	0.519188	0.00726072	0.18161
331.774	1.5101e-09	0.291887	0.519275	0.00726278	0.181576
332.165	1.5102e-09	0.291832	0.519361	0.00726481	0.181542
332.553	1.51111e-09	0.292351	0.518603	0.00725527	0.18179
332.94	1.5112e-09	0.292296	0.51869	0.0072575	0.181757
333.329	1.5113e-09	0.292242	0.518776	0.0072597	0.181723
333.717	1.51139e-09	0.292187	0.518862	0.00726185	0.181689
334.106	1.51148e-09	0.292133	0.518948	0.00726397	0.181655
334.496	1.51158e-09	0.292078	0.519035	0.00726605	0.181621
334.886	1.51167e-09	0.292024	0.519121	0.0072681	0.181587
335.277	1.51177e-09	0.291969	0.519208	0.00727011	0.181553
335.668	1.51186e-09	0.291914	0.519294	0.00727209	0.181519
336.055	1.51278e-09	0.292438	0.518533	0.00726244	0.181766
336.443	1.51287e-09	0.292384	0.518619	0.00726461	0.181732
336.831	1.51296e-09	0.29233	0.518705	0.00726675	0.181698
337.22	1.51306e-09	0.292275	0.518791	0.00726885	0.181665
337.609	1.51315e-09	0.292221	0.518878	0.00727092	0.181631
337.999	1.51325e-09	0.292166	0.518964	0.00727295	0.181597
338.389	1.51334e-09	0.292112	0.51905	0.00727494	0.181563
338.779	1.51344e-09	0.292057	0.519137	0.0072769	0.181529
339.17	1.51353e-09	0.292002	0.519223	0.00727882	0.181495
339.558	1.51446e-09	0.292544	0.51845	0.00726936	0.181737
339.945	1.51455e-09	0.292489	0.518536	0.0072719	0.181703
340.334	1.51465e-09	0.292435	0.518621	0.00727439	0.181669
340.722	1.51474e-09	0.29238	0.518707	0.00727685	0.181636
341.112	1.51483e-09	0.292326	0.518793	0.00727926	0.181602
341.501	1.51493e-09	0.292271	0.518879	0.00728164	0.181568
341.891	1.51502e-09	0.292217	0.518965	0.00728397	0.181534
342.282	1.51512e-09	0.292162	0.519051	0.00728627	0.1815
342.673	1.51521e-09	0.292107	0.519138	0.00728853	0.181466
343.06	1.51613e-09	0.292626	0.518379	0.0072792	0.181716
343.448	1.51622e-09	0.292572	0.518464	0.00728168	0.181682
343.836	1.51632e-09	0.292518	0.51855	0.00728412	0.181649
344.225	1.51641e-09	0.292463	0.518635	0.00728652	0.181615
344.614	1.5165e-09	0.292409	0.518721	0.00728888	0.181581
345.004	1.5166e-09	0.292354	0.518807	0.00729121	0.181547
345.394	1.51669e-09	0.2923	0.518893	0.00729349	0.181513
345.784	1.51679e-09	0.292245	0.518979	0.00729574	0.18148
346.175	1.51688e-09	0.292191	0.519066	0.00729795	0.181446
346.563	1.5178e-09	0.292716	0.518304	0.0072885	0.181692
346.95	1.51789e-09	0.292662	0.518389	0.00729093	0.181658
347.339	1.51799e-09	0.292607	0.518475	0.00729332	0.181624
347.727	1.51808e-09	0.292553	0.518561	0.00729567	0.181591
348.117	1.51818e-09	0.292499	0.518646	0.00729797	0.181557
348.506	1.51827e-09	0.292444	0.518732	0.00730025	0.181523
348.896	1.51836e-09	0.29239	0.518818	0.00730248	0.18149
349.287	1.51846e-09	0.292335	0.518904	0.00730467	0.181456
349.678	1.51855e-09	0.292281	0.51899	0.00730683	0.181422
350.065	1.51947e-09	0.292804	0.51823	0.00729735	0.181668
350.453	1.51957e-09	0.29275	0.518316	0.00729972	0.181634
350.841	1.51966e-09	0.292696	0.518401	0.00730206	0.181601
351.23	1.51975e-09	0.292642	0.518487	0.00730436	0.181567
351.619	1.51985e-09	0.292588	0.518572	0.00730662	0.181533
352.009	1.51994e-09	0.292533	0.518658	0.00730884	0.1815
352.399	1.52004e-09	0.292479	0.518744	0.00731103	0.181466
352.789	1.52013e-09	0.292425	0.51883	0.00731318	0.181432
353.18	1.52022e-09	0.29237	0.518916	0.00731529	0.181399
353.568	1.52114e-09	0.292889	0.518158	0.00730577	0.181647
353.956	1.52124e-09	0.292835	0.518243	0.00730809	0.181614
354.344	1.52133e-09	0.292781	0.518328	0.00731038	0.18158
354.733	1.52142e-09	0.292727	0.518414	0.00731263	0.181547
355.122	1.52152e-09	0.292673	0.518499	0.00731484	0.181513
355.511	1.52161e-09	0.292618	0.518585	0.00731701	0.181479
355.901	1.5217e-09	0.292564	0.518671	0.00731915	0.181446
356.292	1.5218e-09	0.29251	0.518757	0.00732125	0.181412
356.683	1.52189e-09	0.292456	0.518843	0.00732332	0.181379
357.07	1.52281e-09	0.292979	0.518083	0.00731371	0.181624
357.458	1.52291e-09	0.292925	0.518168	0.00731599	0.18159
357.846	1.523e-09	0.292871	0.518254	0.00731822	0.181557
358.235	1.52309e-09	0.292817	0.518339	0.00732042	0.181523
358.624	1.52319e-09	0.292763	0.518424	0.00732259	0.18149
359.014	1.52328e-09	0.292709	0.51851	0.00732472	0.181456
359.404	1.52338e-09	0.292655	0.518596	0.00732681	0.181423
359.794	1.52347e-09	0.292601	0.518681	0.00732886	0.181389
360.185	1.52356e-09	0.292546	0.518767	0.00733088	0.181356
360.573	1.52448e-09	0.293063	0.518014	0.0073213	0.181602
360.961	1.52457e-09	0.293009	0.518099	0.00732353	0.181569
361.349	1.52467e-09	0.292955	0.518184	0.00732572	0.181535
361.738	1.52476e-09	0.292901	0.518269	0.00732788	0.181502
362.127	1.52485e-09	0.292847	0.518355	0.00733	0.181468
362.516	1.52495e-09	0.292793	0.51844	0.00733208	0.181435
362.906	1.52504e-09	0.292739	0.518526	0.00733413	0.181401
363.297	1.52514e-09	0.292685	0.518611	0.00733614	0.181368
363.688	1.52523e-09	0.292631	0.518697	0.00733812	0.181334
364.075	1.52615e-09	0.293152	0.517942	0.00732846	0.181577
364.463	1.52624e-09	0.293098	0.518027	0.00733064	0.181544
364.851	1.52633e-09	0.293044	0.518112	0.00733278	0.181511
365.24	1.52643e-09	0.29299	0.518197	0.00733489	0.181477
365.629	1.52652e-09	0.292936	0.518283	0.00733697	0.181444
366.019	1.52662e-09	0.292882	0.518368	0.00733901	0.181411
366.409	1.52671e-09	0.292828	0.518454	0.00734101	0.181377
366.799	1.5268e-09	0.292774	0.518539	0.00734298	0.181344
367.19	1.5269e-09	0.29272	0.518625	0.00734491	0.18131
367.578	1.52782e-09	0.293241	0.517864	0.00733511	0.18156
367.966	1.52792e-09	0.293188	0.517948	0.00733725	0.181527
368.354	1.52801e-09	0.293134	0.518033	0.00733935	0.181493
368.743	1.5281e-09	0.29308	0.518119	0.00734142	0.18146
369.132	1.5282e-09	0.293026	0.518204	0.00734345	0.181427
369.521	1.52829e-09	0.292972	0.518289	0.00734545	0.181393
369.911	1.52838e-09	0.292918	0.518374	0.00734741	0.18136
370.302	1.52848e-09	0.292864	0.51846	0.00734934	0.181327
370.693	1.52857e-09	0.29281	0.518545	0.00735124	0.181293
371.08	1.52949e-09	0.293341	0.51779	0.00734187	0.181527
371.468	1.52958e-09	0.293287	0.517875	0.00734436	0.181494
371.857	1.52968e-09	0.293233	0.51796	0.00734681	0.181461
372.245	1.52977e-09	0.293179	0.518045	0.00734922	0.181427
372.634	1.52987e-09	0.293125	0.518129	0.00735159	0.181394
373.024	1.52996e-09	0.293071	0.518214	0.00735393	0.181361
373.414	1.53005e-09	0.293017	0.518299	0.00735623	0.181327
373.804	1.53015e-09	0.292963	0.518385	0.00735848	0.181294
374.195	1.53024e-09	0.292909	0.51847	0.00736071	0.18126
374.583	1.53116e-09	0.293424	0.517719	0.00735133	0.181506
374.971	1.53125e-09	0.29337	0.517803	0.00735378	0.181473
375.359	1.53134e-09	0.293316	0.517888	0.00735619	0.18144
375.748	1.53144e-09	0.293262	0.517973	0.00735855	0.181406
376.137	1.53153e-09	0.293209	0.518057	0.00736089	0.181373
376.527	1.53163e-09	0.293155	0.518142	0.00736318	0.18134
376.917	1.53172e-09	0.293101	0.518227	0.00736544	0.181307
377.307	1.53181e-09	0.293047	0.518312	0.00736766	0.181273
377.698	1.53191e-09	0.292993	0.518397	0.00736984	0.18124
378.085	1.53282e-09	0.293508	0.517648	0.00736043	0.181484
378.473	1.53292e-09	0.293454	0.517733	0.00736284	0.181451
378.862	1.53301e-09	0.2934	0.517817	0.0073652	0.181417
379.25	1.5331e-09	0.293346	0.517902	0.00736753	0.181384
379.64	1.5332e-09	0.293293	0.517987	0.00736982	0.181351
380.029	1.53329e-09	0.293239	0.518071	0.00737207	0.181318
380.419	1.53338e-09	0.293185	0.518156	0.00737429	0.181284
380.809	1.53348e-09	0.293131	0.518241	0.00737646	0.181251
381.2	1.53357e-09	0.293077	0.518326	0.00737861	0.181218
381.588	1.53449e-09	0.293598	0.517572	0.00736907	0.181461
381.976	1.53459e-09	0.293545	0.517656	0.00737143	0.181428
382.364	1.53468e-09	0.293491	0.517741	0.00737376	0.181395
382.753	1.53477e-09	0.293437	0.517825	0.00737604	0.181362
383.142	1.53487e-09	0.293384	0.51791	0.00737829	0.181328
383.532	1.53496e-09	0.29333	0.517994	0.0073805	0.181295
383.922	1.53506e-09	0.293276	0.518079	0.00738268	0.181262
384.312	1.53515e-09	0.293222	0.518164	0.00738482	0.181229
384.703	1.53524e-09	0.293169	0.518249	0.00738693	0.181196
385.09	1.53616e-09	0.293684	0.517499	0.0073774	0.181439
385.478	1.53625e-09	0.29363	0.517584	0.00737973	0.181406
385.867	1.53635e-09	0.293577	0.517668	0.00738201	0.181373
386.255	1.53644e-09	0.293523	0.517752	0.00738426	0.18134
386.645	1.53653e-09	0.293469	0.517837	0.00738648	0.181307
387.034	1.53663e-09	0.293416	0.517922	0.00738865	0.181274
387.424	1.53672e-09	0.293362	0.518006	0.00739079	0.181241
387.814	1.53682e-09	0.293308	0.518091	0.0073929	0.181208
388.205	1.53691e-09	0.293255	0.518176	0.00739497	0.181175
388.593	1.53782e-09	0.293765	0.517434	0.0073855	0.181416
388.981	1.53791e-09	0.293711	0.517518	0.00738778	0.181383
389.369	1.53801e-09	0.293658	0.517602	0.00739003	0.18135
389.758	1.5381e-09	0.293604	0.517686	0.00739224	0.181317
390.147	1.53819e-09	0.293551	0.517771	0.00739442	0.181284
390.537	1.53829e-09	0.293497	0.517855	0.00739655	0.181251
390.927	1.53838e-09	0.293443	0.51794	0.00739866	0.181218
391.317	1.53848e-09	0.29339	0.518024	0.00740073	0.181185
391.708	1.53857e-09	0.293336	0.518109	0.00740276	0.181152
392.095	1.53948e-09	0.293848	0.517364	0.0073932	0.181395
392.483	1.53958e-09	0.293795	0.517448	0.00739545	0.181362
392.872	1.53967e-09	0.293741	0.517532	0.00739766	0.181329
393.261	1.53976e-09	0.293688	0.517617	0.00739984	0.181296
393.65	1.53986e-09	0.293634	0.517701	0.00740197	0.181263
394.039	1.53995e-09	0.293581	0.517785	0.00740408	0.18123
394.429	1.54004e-09	0.293527	0.51787	0.00740615	0.181197
394.82	1.54014e-09	0.293474	0.517954	0.00740818	0.181164
395.21	1.54023e-09	0.29342	0.518039	0.00741018	0.181131
395.598	1.54116e-09	0.293943	0.517284	0.00740043	0.181373
395.986	1.54125e-09	0.293889	0.517368	0.00740265	0.18134
396.374	1.54134e-09	0.293836	0.517452	0.00740482	0.181307
396.763	1.54144e-09	0.293782	0.517536	0.00740696	0.181274
397.152	1.54153e-09	0.293729	0.51762	0.00740907	0.181241
397.542	1.54162e-09	0.293676	0.517705	0.00741114	0.181209
397.932	1.54172e-09	0.293622	0.517789	0.00741318	0.181176
398.322	1.54181e-09	0.293569	0.517874	0.00741518	0.181143
398.713	1.54191e-09	0.293515	0.517958	0.00741715	0.18111
399.1	1.54282e-09	0.294026	0.517215	0.00740752	0.181351
399.488	1.54291e-09	0.293973	0.517299	0.0074097	0.181319
399.877	1.54301e-09	0.29392	0.517383	0.00741184	0.181286
400.266	1.5431e-09	0.293866	0.517467	0.00741395	0.181253
400.655	1.54319e-09	0.293813	0.517551	0.00741602	0.18122
401.044	1.54329e-09	0.29376	0.517635	0.00741806	0.181187
401.434	1.54338e-09	0.293706	0.517719	0.00742007	0.181154
401.825	1.54347e-09	0.293653	0.517804	0.00742204	0.181121
402.215	1.54357e-09	0.293599	0.517888	0.00742397	0.181088
402.603	1.54448e-09	0.294109	0.517148	0.00741434	0.181329
402.991	1.54457e-09	0.294056	0.517232	0.00741648	0.181296
403.379	1.54467e-09	0.294003	0.517315	0.00741859	0.181263
403.768	1.54476e-09	0.29395	0.517399	0.00742067	0.18123
404.157	1.54485e-09	0.293896	0.517483	0.00742271	0.181197
404.547	1.54495e-09	0.293843	0.517568	0.00742472	0.181165
404.937	1.54504e-09	0.29379	0.517652	0.00742669	0.181132
405.327	1.54513e-09	0.293736	0.517736	0.00742863	0.181099
405.718	1.54523e-09	0.293683	0.51782	0.00743054	0.181066
406.105	1.54615e-09	0.294196	0.517074	0.00742078	0.181309
406.493	1.54624e-09	0.294143	0.517158	0.00742289	0.181276
406.882	1.54633e-09	0.29409	0.517242	0.00742497	0.181243
407.271	1.54643e-09	0.294037	0.517326	0.00742702	0.181211
407.66	1.54652e-09	0.293984	0.517409	0.00742903	0.181178
408.049	1.54661e-09	0.29393	0.517493	0.00743101	0.181145
408.439	1.54671e-09	0.293877	0.517578	0.00743296	0.181112
408.83	1.5468e-09	0.293824	0.517662	0.00743487	0.18108
409.22	1.54689e-09	0.293771	0.517746	0.00743675	0.181047
409.608	1.5478e-09	0.294278	0.51701	0.00742709	0.181285
409.996	1.5479e-09	0.294225	0.517093	0.00742918	0.181252
410.384	1.54799e-09	0.294172	0.517177	0.00743123	0.18122
410.773	1.54808e-09	0.294119	0.517261	0.00743324	0.181187
411.162	1.54818e-09	0.294066	0.517345	0.00743522	0.181154
411.552	1.54827e-09	0.294013	0.517429	0.00743717	0.181121
411.942	1.54836e-09	0.29396	0.517513	0.00743909	0.181089
412.332	1.54846e-09	0.293906	0.517597	0.00744097	0.181056
412.723	1.54855e-09	0.293853	0.517681	0.00744282	0.181023
413.11	1.54947e-09	0.294365	0.516937	0.00743301	0.181265
413.499	1.54956e-09	0.294312	0.51702	0.00743507	0.181232
413.887	1.54965e-09	0.294259	0.517104	0.00743709	0.1812
414.276	1.54975e-09	0.294206	0.517187	0.00743908	0.181167
414.665	1.54984e-09	0.294153	0.517271	0.00744104	0.181135
415.054	1.54993e-09	0.2941	0.517355	0.00744296	0.181102
415.444	1.55003e-09	0.294047	0.517439	0.00744485	0.181069
415.835	1.55012e-09	0.293994	0.517523	0.00744671	0.181037
416.225	1.55021e-09	0.293941	0.517607	0.00744853	0.181004
416.613	1.55113e-09	0.294459	0.516867	0.00743912	0.181235
417.001	1.55122e-09	0.294406	0.51695	0.00744152	0.181203
417.389	1.55132e-09	0.294353	0.517033	0.00744387	0.18117
417.778	1.55141e-09	0.2943	0.517117	0.00744619	0.181138
418.167	1.5515e-09	0.294246	0.5172	0.00744848	0.181105
418.557	1.5516e-09	0.294193	0.517284	0.00745072	0.181072
418.947	1.55169e-09	0.29414	0.517367	0.00745294	0.18104
419.337	1.55178e-09	0.294087	0.517451	0.00745511	0.181007
419.728	1.55188e-09	0.294034	0.517535	0.00745725	0.180974
420.115	1.55279e-09	0.294544	0.516795	0.0074478	0.181214
420.504	1.55289e-09	0.294491	0.516878	0.00745016	0.181182
420.892	1.55298e-09	0.294438	0.516961	0.00745249	0.181149
421.281	1.55307e-09	0.294385	0.517044	0.00745479	0.181116
421.67	1.55317e-09	0.294332	0.517128	0.00745704	0.181084
422.059	1.55326e-09	0.294278	0.517211	0.00745927	0.181051
422.449	1.55335e-09	0.294225	0.517295	0.00746145	0.181019
422.84	1.55345e-09	0.294172	0.517378	0.0074636	0.180986
423.23	1.55354e-09	0.294119	0.517462	0.00746572	0.180953
423.618	1.55445e-09	0.294627	0.516725	0.00745626	0.181192
424.006	1.55455e-09	0.294574	0.516808	0.0074586	0.181159
424.395	1.55464e-09	0.294521	0.516891	0.00746091	0.181127
424.783	1.55473e-09	0.294469	0.516974	0.00746317	0.181094
425.173	1.55483e-09	0.294416	0.517057	0.0074654	0.181062
425.562	1.55492e-09	0.294363	0.517141	0.0074676	0.181029
425.952	1.55501e-09	0.29431	0.517224	0.00746975	0.180996
426.342	1.55511e-09	0.294257	0.517308	0.00747188	0.180964
426.733	1.5552e-09	0.294204	0.517391	0.00747397	0.180931
427.12	1.55611e-09	0.29471	0.516656	0.0074645	0.181169
427.509	1.55621e-09	0.294657	0.516739	0.00746681	0.181137
427.897	1.5563e-09	0.294604	0.516822	0.00746909	0.181104
428.286	1.55639e-09	0.294552	0.516905	0.00747133	0.181072
428.675	1.55649e-09	0.294499	0.516988	0.00747353	0.181039
429.065	1.55658e-09	0.294446	0.517071	0.0074757	0.181007
429.454	1.55667e-09	0.294393	0.517155	0.00747783	0.180974
429.845	1.55676e-09	0.29434	0.517238	0.00747993	0.180942
430.235	1.55686e-09	0.294287	0.517322	0.007482	0.180909
430.623	1.55778e-09	0.294801	0.516577	0.00747235	0.18115
431.011	1.55788e-09	0.294748	0.516659	0.00747464	0.181118
431.4	1.55797e-09	0.294695	0.516742	0.0074769	0.181086
431.788	1.55806e-09	0.294642	0.516825	0.00747911	0.181053
432.178	1.55815e-09	0.29459	0.516908	0.0074813	0.181021
432.567	1.55825e-09	0.294537	0.516992	0.00748345	0.180988
432.957	1.55834e-09	0.294484	0.517075	0.00748556	0.180956
433.347	1.55843e-09	0.294431	0.517158	0.00748764	0.180923
433.738	1.55853e-09	0.294378	0.517241	0.00748968	0.180891
434.126	1.55943e-09	0.294874	0.516523	0.00748038	0.181123
434.514	1.55952e-09	0.294822	0.516606	0.00748264	0.18109
434.902	1.55961e-09	0.294769	0.516688	0.00748486	0.181058
435.291	1.55971e-09	0.294716	0.516771	0.00748705	0.181026
435.68	1.5598e-09	0.294663	0.516854	0.0074892	0.180993
436.07	1.55989e-09	0.294611	0.516937	0.00749132	0.180961
436.459	1.55998e-09	0.294558	0.51702	0.00749341	0.180928
436.85	1.56008e-09	0.294505	0.517104	0.00749546	0.180896
437.24	1.56017e-09	0.294452	0.517187	0.00749748	0.180864
437.628	1.56109e-09	0.294963	0.516446	0.00748781	0.181103
438.016	1.56119e-09	0.294911	0.516529	0.00749005	0.18107
438.405	1.56128e-09	0.294858	0.516611	0.00749226	0.181038
438.793	1.56137e-09	0.294806	0.516694	0.00749442	0.181006
439.183	1.56146e-09	0.294753	0.516777	0.00749656	0.180973
439.572	1.56156e-09	0.2947	0.51686	0.00749866	0.180941
439.962	1.56165e-09	0.294647	0.516943	0.00750072	0.180909
440.352	1.56174e-09	0.294595	0.517026	0.00750275	0.180876
440.743	1.56184e-09	0.294542	0.517109	0.00750475	0.180844
441.131	1.56276e-09	0.295051	0.516371	0.00749509	0.181083
441.519	1.56285e-09	0.294998	0.516453	0.00749731	0.181051
441.907	1.56294e-09	0.294946	0.516536	0.00749949	0.181019
442.296	1.56304e-09	0.294893	0.516619	0.00750164	0.180986
442.685	1.56313e-09	0.294841	0.516701	0.00750376	0.180954
443.075	1.56322e-09	0.294788	0.516784	0.00750584	0.180922
443.465	1.56332e-09	0.294735	0.516867	0.00750788	0.18089
443.855	1.56341e-09	0.294683	0.51695	0.0075099	0.180857
444.245	1.5635e-09	0.29463	0.517033	0.00751188	0.180825
444.633	1.56442e-09	0.295138	0.516297	0.00750222	0.181063
445.021	1.56451e-09	0.295085	0.516379	0.00750442	0.181031
445.41	1.56461e-09	0.295033	0.516462	0.00750658	0.180999
445.799	1.5647e-09	0.29498	0.516544	0.00750871	0.180966
446.188	1.56479e-09	0.294928	0.516627	0.00751081	0.180934
446.577	1.56489e-09	0.294875	0.51671	0.00751287	0.180902
446.967	1.56498e-09	0.294823	0.516793	0.0075149	0.18087
447.357	1.56507e-09	0.29477	0.516876	0.0075169	0.180838
447.748	1.56516e-09	0.294717	0.516959	0.00751886	0.180805
448.136	1.56606e-09	0.29521	0.516242	0.00750946	0.181039
448.524	1.56616e-09	0.295158	0.516324	0.00751164	0.181007
448.912	1.56625e-09	0.295105	0.516407	0.00751378	0.180975
449.301	1.56634e-09	0.295053	0.516489	0.0075159	0.180942
449.69	1.56644e-09	0.295	0.516572	0.00751798	0.18091
450.08	1.56653e-09	0.294948	0.516654	0.00752002	0.180878
450.47	1.56662e-09	0.294895	0.516737	0.00752203	0.180846
450.86	1.56671e-09	0.294843	0.51682	0.00752401	0.180814
451.25	1.56681e-09	0.29479	0.516903	0.00752596	0.180782
451.638	1.56772e-09	0.295296	0.51617	0.0075163	0.181018
452.026	1.56782e-09	0.295243	0.516253	0.00751847	0.180986
452.415	1.56791e-09	0.295191	0.516335	0.00752059	0.180954
452.804	1.568e-09	0.295138	0.516417	0.00752269	0.180921
453.193	1.5681e-09	0.295086	0.5165	0.00752475	0.180889
453.582	1.56819e-09	0.295034	0.516582	0.00752678	0.180857
453.972	1.56828e-09	0.294981	0.516665	0.00752878	0.180825
454.362	1.56837e-09	0.294929	0.516748	0.00753074	0.180793
454.753	1.56847e-09	0.294876	0.51683	0.00753267	0.180761
455.141	1.56938e-09	0.295381	0.516101	0.00752302	0.180995
455.529	1.56948e-09	0.295328	0.516183	0.00752516	0.180963
455.917	1.56957e-09	0.295276	0.516265	0.00752727	0.180931
456.306	1.56966e-09	0.295224	0.516348	0.00752935	0.180899
456.695	1.56975e-09	0.295171	0.51643	0.0075314	0.180867
457.085	1.56985e-09	0.295119	0.516512	0.00753341	0.180835
457.475	1.56994e-09	0.295067	0.516595	0.00753539	0.180803
457.865	1.57003e-09	0.295014	0.516677	0.00753733	0.180771
458.255	1.57013e-09	0.294962	0.51676	0.00753925	0.180739
458.643	1.57104e-09	0.295464	0.516033	0.0075296	0.180973
459.031	1.57113e-09	0.295412	0.516115	0.00753173	0.180941
459.42	1.57122e-09	0.29536	0.516197	0.00753382	0.180909
459.809	1.57132e-09	0.295308	0.516279	0.00753588	0.180877
460.198	1.57141e-09	0.295255	0.516361	0.00753791	0.180845
460.587	1.5715e-09	0.295203	0.516444	0.0075399	0.180813
460.977	1.5716e-09	0.295151	0.516526	0.00754187	0.180781
461.367	1.57169e-09	0.295098	0.516609	0.0075438	0.180749
461.758	1.57178e-09	0.295046	0.516691	0.0075457	0.180717
462.146	1.57269e-09	0.295541	0.515971	0.00753613	0.180952
462.534	1.57278e-09	0.295489	0.516053	0.00753824	0.18092
462.922	1.57287e-09	0.295437	0.516135	0.00754032	0.180888
463.311	1.57297e-09	0.295385	0.516217	0.00754237	0.180856
463.7	1.57306e-09	0.295332	0.516299	0.00754438	0.180824
464.09	1.57315e-09	0.29528	0.516381	0.00754636	0.180792
464.48	1.57324e-09	0.295228	0.516464	0.00754831	0.18076
464.87	1.57334e-09	0.295175	0.516546	0.00755023	0.180728
465.26	1.57343e-09	0.295123	0.516629	0.00755211	0.180696
465.648	1.57435e-09	0.295631	0.515893	0.0075423	0.180933
466.036	1.57445e-09	0.295579	0.515975	0.00754439	0.180901
466.425	1.57454e-09	0.295527	0.516057	0.00754646	0.18087
466.814	1.57463e-09	0.295475	0.516139	0.00754849	0.180838
467.203	1.57472e-09	0.295423	0.516221	0.00755049	0.180806
467.592	1.57482e-09	0.29537	0.516303	0.00755245	0.180774
467.982	1.57491e-09	0.295318	0.516385	0.00755439	0.180742
468.372	1.575e-09	0.295266	0.516468	0.00755629	0.18071
468.763	1.57509e-09	0.295214	0.51655	0.00755816	0.180678
469.151	1.576e-09	0.295713	0.515829	0.00754854	0.180909
469.539	1.5761e-09	0.295661	0.515911	0.00755062	0.180877
469.927	1.57619e-09	0.295609	0.515993	0.00755266	0.180845
470.316	1.57628e-09	0.295557	0.516075	0.00755468	0.180814
470.705	1.57637e-09	0.295505	0.516157	0.00755666	0.180782
471.095	1.57647e-09	0.295453	0.516239	0.00755861	0.18075
471.485	1.57656e-09	0.2954	0.516321	0.00756053	0.180718
471.875	1.57665e-09	0.295348	0.516403	0.00756242	0.180686
472.265	1.57675e-09	0.295296	0.516485	0.00756428	0.180654
472.653	1.57766e-09	0.295795	0.515759	0.00755455	0.180891
473.041	1.57775e-09	0.295743	0.51584	0.00755662	0.180859
473.43	1.57785e-09	0.295691	0.515922	0.00755867	0.180828
473.819	1.57794e-09	0.295639	0.516004	0.00756068	0.180796
474.208	1.57803e-09	0.295587	0.516086	0.00756265	0.180764
474.597	1.57812e-09	0.295535	0.516168	0.0075646	0.180732
474.987	1.57822e-09	0.295483	0.51625	0.00756651	0.1807
475.377	1.57831e-09	0.295431	0.516332	0.0075684	0.180669
475.768	1.5784e-09	0.295379	0.516414	0.00757025	0.180637
476.156	1.57931e-09	0.295875	0.515698	0.00756065	0.180866
476.544	1.5794e-09	0.295823	0.515779	0.00756271	0.180834
476.932	1.57949e-09	0.295771	0.515861	0.00756473	0.180803
477.321	1.57959e-09	0.29572	0.515943	0.00756673	0.180771
477.71	1.57968e-09	0.295668	0.516025	0.00756869	0.180739
478.1	1.57977e-09	0.295615	0.516106	0.00757063	0.180707
478.49	1.57986e-09	0.295563	0.516188	0.00757253	0.180676
478.88	1.57996e-09	0.295511	0.51627	0.0075744	0.180644
479.27	1.58005e-09	0.295459	0.516352	0.00757624	0.180612
479.658	1.58096e-09	0.295962	0.515632	0.00756689	0.180839
480.046	1.58105e-09	0.29591	0.515713	0.00756927	0.180808
480.435	1.58115e-09	0.295858	0.515795	0.00757161	0.180776
480.824	1.58124e-09	0.295806	0.515876	0.00757392	0.180744
481.213	1.58133e-09	0.295754	0.515958	0.0075762	0.180712
481.602	1.58142e-09	0.295702	0.516039	0.00757844	0.180681
481.992	1.58152e-09	0.29565	0.516121	0.00758064	0.180649
482.382	1.58161e-09	0.295598	0.516202	0.00758281	0.180617
482.773	1.5817e-09	0.295546	0.516284	0.00758495	0.180585
483.161	1.58263e-09	0.296055	0.515548	0.00757535	0.180821
483.549	1.58272e-09	0.296003	0.515629	0.00757773	0.18079
483.937	1.58282e-09	0.295951	0.515711	0.00758006	0.180758
484.326	1.58291e-09	0.295899	0.515792	0.00758237	0.180726
484.715	1.583e-09	0.295847	0.515873	0.00758463	0.180695
485.105	1.58309e-09	0.295795	0.515955	0.00758687	0.180663
485.495	1.58319e-09	0.295743	0.516036	0.00758906	0.180631
485.885	1.58328e-09	0.295691	0.516118	0.00759123	0.1806
486.275	1.58337e-09	0.295639	0.5162	0.00759336	0.180568
486.663	1.58427e-09	0.296126	0.515494	0.00758418	0.180797
487.051	1.58436e-09	0.296074	0.515575	0.00758653	0.180765
487.44	1.58446e-09	0.296022	0.515656	0.00758886	0.180734
487.829	1.58455e-09	0.29597	0.515737	0.00759114	0.180702
488.218	1.58464e-09	0.295918	0.515818	0.0075934	0.18067
488.607	1.58473e-09	0.295866	0.5159	0.00759561	0.180639
488.997	1.58483e-09	0.295814	0.515981	0.0075978	0.180607
489.387	1.58492e-09	0.295762	0.516063	0.00759995	0.180575
489.778	1.58501e-09	0.29571	0.516144	0.00760207	0.180543
490.166	1.58593e-09	0.296203	0.515423	0.0075923	0.180782
490.554	1.58602e-09	0.296152	0.515504	0.00759433	0.18075
490.943	1.58611e-09	0.2961	0.515585	0.00759632	0.180719
491.331	1.5862e-09	0.296048	0.515667	0.00759828	0.180687
491.721	1.5863e-09	0.295996	0.515748	0.00760021	0.180655
492.11	1.58639e-09	0.295945	0.515829	0.00760211	0.180624
492.5	1.58648e-09	0.295893	0.515911	0.00760398	0.180592
492.89	1.58657e-09	0.295841	0.515992	0.00760582	0.180561
493.28	1.58667e-09	0.295789	0.516074	0.00760763	0.180529
493.668	1.58757e-09	0.296287	0.515362	0.00759832	0.180753
494.056	1.58766e-09	0.296235	0.515443	0.00760066	0.180721
494.445	1.58776e-09	0.296183	0.515524	0.00760296	0.18069
494.834	1.58785e-09	0.296131	0.515605	0.00760523	0.180658
495.223	1.58794e-09	0.29608	0.515686	0.00760747	0.180627
495.613	1.58803e-09	0.296028	0.515767	0.00760967	0.180595
496.002	1.58813e-09	0.295976	0.515849	0.00761184	0.180564
496.392	1.58822e-09	0.295924	0.51593	0.00761397	0.180532
496.783	1.58831e-09	0.295872	0.516011	0.00761607	0.1805
497.171	1.58924e-09	0.296377	0.515284	0.00760651	0.180733
497.559	1.58933e-09	0.296325	0.515364	0.00760884	0.180702
497.948	1.58942e-09	0.296273	0.515445	0.00761114	0.18067
498.336	1.58951e-09	0.296222	0.515526	0.0076134	0.180639
498.726	1.5896e-09	0.29617	0.515607	0.00761563	0.180607
499.115	1.5897e-09	0.296118	0.515688	0.00761783	0.180576
499.505	1.58979e-09	0.296067	0.515769	0.00761999	0.180544
499.895	1.58988e-09	0.296015	0.515851	0.00762212	0.180512
500.285	1.58998e-09	0.295963	0.515932	0.00762422	0.180481
500.673	1.59088e-09	0.296445	0.515222	0.00761456	0.180719
501.062	1.59097e-09	0.296393	0.515302	0.00761657	0.180688
501.45	1.59107e-09	0.296342	0.515383	0.00761855	0.180656
501.839	1.59116e-09	0.29629	0.515464	0.0076205	0.180625
502.228	1.59125e-09	0.296239	0.515545	0.00762241	0.180593
502.618	1.59134e-09	0.296187	0.515627	0.00762429	0.180562
503.007	1.59144e-09	0.296136	0.515708	0.00762615	0.18053
503.397	1.59153e-09	0.296084	0.515789	0.00762797	0.180499
503.788	1.59162e-09	0.296032	0.51587	0.00762977	0.180468
504.176	1.59252e-09	0.296526	0.515165	0.00762049	0.180688
504.564	1.59261e-09	0.296475	0.515246	0.00762281	0.180657
504.953	1.59271e-09	0.296423	0.515326	0.00762509	0.180625
505.341	1.5928e-09	0.296372	0.515407	0.00762734	0.180594
505.731	1.59289e-09	0.29632	0.515488	0.00762956	0.180562
506.12	1.59298e-09	0.296268	0.515569	0.00763174	0.180531
506.51	1.59308e-09	0.296217	0.51565	0.00763389	0.1805
506.9	1.59317e-09	0.296165	0.515731	0.007636	0.180468
507.29	1.59326e-09	0.296113	0.515812	0.00763808	0.180437
507.678	1.59418e-09	0.296614	0.51509	0.00762856	0.180668
508.067	1.59427e-09	0.296562	0.515171	0.00763087	0.180636
508.455	1.59437e-09	0.296511	0.515251	0.00763315	0.180605
508.844	1.59446e-09	0.296459	0.515332	0.00763539	0.180574
509.233	1.59455e-09	0.296408	0.515413	0.00763761	0.180542
509.623	1.59464e-09	0.296356	0.515493	0.00763978	0.180511
510.012	1.59473e-09	0.296304	0.515574	0.00764193	0.180479
510.402	1.59483e-09	0.296253	0.515655	0.00764404	0.180448
510.793	1.59492e-09	0.296201	0.515736	0.00764612	0.180417
511.181	1.59583e-09	0.296687	0.515021	0.00763635	0.180656
511.569	1.59593e-09	0.296636	0.515102	0.00763834	0.180624
511.958	1.59602e-09	0.296584	0.515182	0.00764031	0.180593
512.347	1.59611e-09	0.296533	0.515263	0.00764224	0.180562
512.736	1.5962e-09	0.296482	0.515344	0.00764414	0.180531
513.125	1.59629e-09	0.29643	0.515425	0.00764601	0.180499
513.515	1.59639e-09	0.296379	0.515505	0.00764785	0.180468
513.905	1.59648e-09	0.296327	0.515586	0.00764967	0.180437
514.295	1.59657e-09	0.296276	0.515667	0.00765145	0.180405
514.683	1.59748e-09	0.296774	0.514956	0.00764204	0.180628
515.072	1.59757e-09	0.296722	0.515036	0.00764435	0.180597
515.46	1.59767e-09	0.296671	0.515117	0.00764663	0.180566
515.849	1.59776e-09	0.29662	0.515197	0.00764887	0.180534
516.238	1.59785e-09	0.296568	0.515278	0.00765108	0.180503
516.628	1.59794e-09	0.296517	0.515358	0.00765325	0.180472
517.017	1.59804e-09	0.296465	0.515439	0.00765539	0.180441
517.407	1.59813e-09	0.296414	0.515519	0.0076575	0.180409
517.798	1.59822e-09	0.296362	0.5156	0.00765957	0.180378
518.186	1.59913e-09	0.296859	0.514886	0.00765011	0.180606
518.574	1.59923e-09	0.296807	0.514966	0.00765241	0.180574
518.963	1.59932e-09	0.296756	0.515046	0.00765468	0.180543
519.352	1.59941e-09	0.296705	0.515127	0.00765692	0.180512
519.741	1.5995e-09	0.296653	0.515207	0.00765912	0.180481
520.13	1.5996e-09	0.296602	0.515287	0.00766129	0.18045
520.52	1.59969e-09	0.29655	0.515368	0.00766343	0.180418
520.91	1.59978e-09	0.296499	0.515448	0.00766553	0.180387
521.3	1.59987e-09	0.296447	0.515529	0.00766761	0.180356
521.688	1.60078e-09	0.29693	0.514819	0.00765788	0.180593
522.077	1.60088e-09	0.296879	0.5149	0.00765987	0.180561
522.465	1.60097e-09	0.296828	0.51498	0.00766183	0.18053
522.854	1.60106e-09	0.296777	0.51506	0.00766377	0.180499
523.243	1.60115e-09	0.296725	0.515141	0.00766567	0.180468
523.633	1.60124e-09	0.296674	0.515221	0.00766754	0.180437
524.022	1.60134e-09	0.296623	0.515302	0.00766938	0.180406
524.412	1.60143e-09	0.296572	0.515382	0.00767119	0.180375
524.803	1.60152e-09	0.29652	0.515463	0.00767297	0.180344
525.191	1.60243e-09	0.297014	0.514759	0.00766364	0.180563
525.579	1.60252e-09	0.296963	0.514839	0.00766594	0.180532
525.968	1.60261e-09	0.296911	0.514919	0.00766821	0.180501
526.357	1.6027e-09	0.29686	0.514999	0.00767044	0.18047
526.746	1.60279e-09	0.296809	0.515079	0.00767264	0.180439
527.135	1.60289e-09	0.296758	0.51516	0.00767481	0.180408
527.525	1.60298e-09	0.296706	0.51524	0.00767694	0.180377
527.915	1.60307e-09	0.296655	0.51532	0.00767905	0.180345
528.305	1.60316e-09	0.296604	0.515401	0.00768112	0.180314
528.693	1.60407e-09	0.297084	0.514695	0.00767144	0.180549
529.082	1.60416e-09	0.297033	0.514775	0.00767343	0.180518
529.47	1.60426e-09	0.296982	0.514856	0.00767539	0.180487
529.859	1.60435e-09	0.29693	0.514936	0.00767732	0.180456
530.248	1.60444e-09	0.296879	0.515016	0.00767922	0.180425
530.638	1.60453e-09	0.296828	0.515096	0.0076811	0.180394
531.027	1.60462e-09	0.296777	0.515177	0.00768294	0.180363
531.417	1.60472e-09	0.296726	0.515257	0.00768475	0.180332
531.808	1.60481e-09	0.296675	0.515338	0.00768653	0.180301
532.196	1.60574e-09	0.297187	0.51461	0.00767683	0.180526
532.584	1.60583e-09	0.297136	0.51469	0.00767914	0.180495
532.973	1.60592e-09	0.297085	0.51477	0.00768141	0.180464
533.362	1.60602e-09	0.297034	0.51485	0.00768365	0.180433
533.751	1.60611e-09	0.296983	0.51493	0.00768586	0.180402
534.14	1.6062e-09	0.296932	0.51501	0.00768804	0.180371
534.53	1.60629e-09	0.29688	0.51509	0.00769018	0.18034
534.92	1.60639e-09	0.296829	0.51517	0.00769229	0.180309
535.31	1.60648e-09	0.296778	0.51525	0.00769436	0.180278
535.698	1.60737e-09	0.297249	0.51456	0.0076849	0.180507
536.087	1.60746e-09	0.297198	0.51464	0.0076869	0.180476
536.475	1.60755e-09	0.297147	0.51472	0.00768887	0.180445
536.864	1.60765e-09	0.297096	0.5148	0.00769081	0.180414
537.253	1.60774e-09	0.297045	0.51488	0.00769272	0.180383
537.643	1.60783e-09	0.296994	0.51496	0.0076946	0.180352
538.033	1.60792e-09	0.296942	0.51504	0.00769646	0.180321
538.423	1.60801e-09	0.296891	0.51512	0.00769828	0.18029
538.813	1.60811e-09	0.29684	0.5152	0.00770007	0.180259
539.201	1.60902e-09	0.297337	0.514493	0.00769065	0.18048
539.589	1.60911e-09	0.297286	0.514573	0.00769295	0.180449
539.978	1.6092e-09	0.297235	0.514652	0.00769523	0.180418
540.367	1.6093e-09	0.297184	0.514732	0.00769747	0.180387
540.756	1.60939e-09	0.297132	0.514812	0.00769967	0.180356
541.145	1.60948e-09	0.297081	0.514892	0.00770185	0.180325
541.535	1.60957e-09	0.29703	0.514971	0.00770399	0.180294
541.925	1.60966e-09	0.296979	0.515051	0.0077061	0.180263
542.315	1.60976e-09	0.296928	0.515131	0.00770817	0.180232
542.703	1.61067e-09	0.29741	0.514423	0.00769843	0.180468
543.092	1.61076e-09	0.29736	0.514503	0.00770044	0.180437
543.48	1.61085e-09	0.297309	0.514582	0.00770242	0.180406
543.869	1.61095e-09	0.297258	0.514662	0.00770437	0.180376
544.258	1.61104e-09	0.297207	0.514742	0.00770629	0.180345
544.648	1.61113e-09	0.297156	0.514822	0.00770818	0.180314
545.038	1.61122e-09	0.297105	0.514902	0.00771005	0.180283
545.428	1.61131e-09	0.297054	0.514982	0.00771188	0.180252
545.818	1.61141e-09	0.297003	0.515062	0.00771368	0.180221
546.206	1.6123e-09	0.297483	0.514369	0.00770415	0.180444
546.594	1.6124e-09	0.297433	0.514448	0.00770617	0.180413
546.983	1.61249e-09	0.297382	0.514528	0.00770815	0.180382
547.372	1.61258e-09	0.297331	0.514608	0.00771011	0.180351
547.761	1.61267e-09	0.29728	0.514687	0.00771203	0.180321
548.15	1.61276e-09	0.297229	0.514767	0.00771392	0.18029
548.54	1.61286e-09	0.297178	0.514847	0.00771579	0.180259
548.93	1.61295e-09	0.297127	0.514927	0.00771762	0.180228
549.32	1.61304e-09	0.297077	0.515007	0.00771943	0.180197
549.708	1.61395e-09	0.297569	0.514305	0.00771007	0.180416
550.097	1.61404e-09	0.297518	0.514384	0.00771239	0.180385
550.485	1.61413e-09	0.297467	0.514464	0.00771467	0.180355
550.874	1.61422e-09	0.297416	0.514543	0.00771692	0.180324
551.263	1.61432e-09	0.297365	0.514623	0.00771913	0.180293
551.653	1.61441e-09	0.297314	0.514702	0.00772132	0.180262
552.043	1.6145e-09	0.297263	0.514782	0.00772347	0.180231
552.433	1.61459e-09	0.297212	0.514861	0.00772558	0.180201
552.823	1.61468e-09	0.297161	0.514941	0.00772767	0.18017
553.211	1.61561e-09	0.297648	0.514228	0.00771784	0.180406
553.599	1.6157e-09	0.297597	0.514307	0.00771986	0.180376
553.988	1.61579e-09	0.297547	0.514387	0.00772186	0.180345
554.377	1.61588e-09	0.297496	0.514466	0.00772383	0.180314
554.766	1.61597e-09	0.297445	0.514546	0.00772577	0.180283
555.155	1.61607e-09	0.297394	0.514625	0.00772768	0.180253
555.545	1.61616e-09	0.297343	0.514705	0.00772956	0.180222
555.935	1.61625e-09	0.297293	0.514785	0.0077314	0.180191
556.325	1.61634e-09	0.297242	0.514864	0.00773323	0.18016
556.713	1.61725e-09	0.297726	0.514165	0.0077236	0.180385
557.102	1.61734e-09	0.297675	0.514245	0.00772564	0.180355
557.49	1.61743e-09	0.297624	0.514324	0.00772765	0.180324
557.879	1.61752e-09	0.297574	0.514403	0.00772963	0.180293
558.268	1.61762e-09	0.297523	0.514483	0.00773158	0.180263
558.658	1.61771e-09	0.297472	0.514562	0.0077335	0.180232
559.048	1.6178e-09	0.297422	0.514642	0.00773538	0.180201
559.438	1.61789e-09	0.297371	0.514721	0.00773724	0.180171
559.828	1.61798e-09	0.29732	0.514801	0.00773907	0.18014
560.216	1.61889e-09	0.297803	0.514105	0.00772949	0.180363
560.604	1.61898e-09	0.297752	0.514184	0.00773153	0.180333
560.993	1.61907e-09	0.297701	0.514263	0.00773354	0.180302
561.382	1.61916e-09	0.297651	0.514342	0.00773552	0.180271
561.771	1.61926e-09	0.2976	0.514422	0.00773748	0.180241
562.16	1.61935e-09	0.29755	0.514501	0.0077394	0.18021
562.55	1.61944e-09	0.297499	0.51458	0.00774129	0.180179
562.94	1.61953e-09	0.297448	0.51466	0.00774315	0.180149
563.33	1.61962e-09	0.297397	0.514739	0.00774499	0.180118
563.718	1.62053e-09	0.297879	0.514044	0.00773542	0.180341
564.107	1.62062e-09	0.297829	0.514123	0.00773747	0.180311
564.495	1.62071e-09	0.297778	0.514202	0.0077395	0.18028
564.884	1.6208e-09	0.297728	0.514281	0.00774149	0.18025
565.273	1.62089e-09	0.297677	0.514361	0.00774345	0.180219
565.663	1.62099e-09	0.297626	0.51444	0.00774538	0.180188
566.053	1.62108e-09	0.297576	0.514519	0.00774728	0.180158
566.443	1.62117e-09	0.297525	0.514599	0.00774916	0.180127
566.833	1.62126e-09	0.297474	0.514678	0.007751	0.180096
567.221	1.62218e-09	0.297962	0.513975	0.00774131	0.180322
567.609	1.62227e-09	0.297911	0.514054	0.00774338	0.180292
567.998	1.62236e-09	0.297861	0.514133	0.00774541	0.180261
568.387	1.62245e-09	0.29781	0.514212	0.00774742	0.180231
568.776	1.62254e-09	0.29776	0.514291	0.00774939	0.1802
569.165	1.62264e-09	0.297709	0.51437	0.00775133	0.18017
569.555	1.62273e-09	0.297659	0.514449	0.00775324	0.180139
569.945	1.62282e-09	0.297608	0.514528	0.00775513	0.180108
570.335	1.62291e-09	0.297557	0.514608	0.00775698	0.180078
570.723	1.62381e-09	0.298036	0.513917	0.00774748	0.180299
571.112	1.6239e-09	0.297986	0.513996	0.00774955	0.180269
571.5	1.624e-09	0.297935	0.514074	0.00775158	0.180238
571.889	1.62409e-09	0.297885	0.514153	0.00775359	0.180208
572.279	1.62418e-09	0.297834	0.514232	0.00775556	0.180177
572.668	1.62427e-09	0.297784	0.514312	0.00775751	0.180147
573.058	1.62436e-09	0.297733	0.514391	0.00775943	0.180116
573.448	1.62445e-09	0.297683	0.51447	0.00776131	0.180086
573.838	1.62455e-09	0.297632	0.514549	0.00776317	0.180055
574.226	1.62546e-09	0.298118	0.513849	0.00775354	0.18028
574.614	1.62555e-09	0.298067	0.513928	0.00775562	0.180249
575.003	1.62564e-09	0.298017	0.514007	0.00775767	0.180219
575.392	1.62573e-09	0.297966	0.514086	0.00775968	0.180188
575.781	1.62583e-09	0.297916	0.514165	0.00776167	0.180158
576.17	1.62592e-09	0.297865	0.514244	0.00776363	0.180127
576.56	1.62601e-09	0.297815	0.514323	0.00776556	0.180097
576.95	1.6261e-09	0.297765	0.514402	0.00776746	0.180066
577.34	1.62619e-09	0.297714	0.514481	0.00776933	0.180036
577.728	1.6271e-09	0.298197	0.513783	0.00775972	0.18026
578.117	1.62719e-09	0.298147	0.513862	0.00776182	0.180229
578.505	1.62729e-09	0.298097	0.513941	0.00776388	0.180199
578.894	1.62738e-09	0.298046	0.514019	0.00776591	0.180169
579.284	1.62747e-09	0.297996	0.514098	0.00776791	0.180138
579.673	1.62756e-09	0.297945	0.514177	0.00776988	0.180108
580.063	1.62765e-09	0.297895	0.514256	0.00777182	0.180077
580.453	1.62774e-09	0.297845	0.514335	0.00777373	0.180047
580.843	1.62784e-09	0.297794	0.514414	0.00777561	0.180016
581.231	1.62874e-09	0.29827	0.513723	0.00776612	0.180241
581.619	1.62883e-09	0.29822	0.513802	0.00776822	0.18021
582.008	1.62892e-09	0.298169	0.51388	0.0077703	0.18018
582.397	1.62902e-09	0.298119	0.513959	0.00777234	0.18015
582.786	1.62911e-09	0.298069	0.514038	0.00777435	0.180119
583.176	1.6292e-09	0.298018	0.514116	0.00777633	0.180089
583.565	1.62929e-09	0.297968	0.514195	0.00777829	0.180058
583.955	1.62938e-09	0.297918	0.514274	0.00778021	0.180028
584.345	1.62947e-09	0.297867	0.514353	0.0077821	0.179998
584.733	1.63038e-09	0.298348	0.513659	0.00777257	0.18022
585.122	1.63047e-09	0.298298	0.513738	0.00777469	0.18019
585.511	1.63057e-09	0.298248	0.513816	0.00777677	0.180159
585.899	1.63066e-09	0.298198	0.513895	0.00777883	0.180129
586.289	1.63075e-09	0.298147	0.513973	0.00778085	0.180099
586.678	1.63084e-09	0.298097	0.514052	0.00778285	0.180068
587.068	1.63093e-09	0.298047	0.514131	0.00778481	0.180038
587.458	1.63102e-09	0.297996	0.514209	0.00778675	0.180008
587.848	1.63112e-09	0.297946	0.514288	0.00778865	0.179977
588.236	1.63202e-09	0.298427	0.513596	0.00777915	0.180198
588.624	1.63211e-09	0.298377	0.513674	0.00778128	0.180168
589.013	1.63221e-09	0.298326	0.513753	0.00778338	0.180137
589.402	1.6323e-09	0.298276	0.513831	0.00778545	0.180107
589.791	1.63239e-09	0.298226	0.51391	0.00778748	0.180077
590.181	1.63248e-09	0.298176	0.513988	0.00778949	0.180047
590.57	1.63257e-09	0.298125	0.514067	0.00779147	0.180016
590.96	1.63266e-09	0.298075	0.514146	0.00779342	0.179986
591.35	1.63276e-09	0.298025	0.514224	0.00779533	0.179956
591.738	1.63366e-09	0.298504	0.513534	0.00778586	0.180176
592.127	1.63375e-09	0.298453	0.513612	0.007788	0.180146
592.516	1.63384e-09	0.298403	0.513691	0.00779011	0.180116
592.904	1.63394e-09	0.298353	0.513769	0.00779219	0.180086
593.294	1.63403e-09	0.298303	0.513847	0.00779424	0.180055
593.683	1.63412e-09	0.298253	0.513926	0.00779626	0.180025
594.073	1.63421e-09	0.298203	0.514004	0.00779825	0.179995
594.463	1.6343e-09	0.298152	0.514083	0.0078002	0.179964
594.853	1.63439e-09	0.298102	0.514162	0.00780213	0.179934
595.241	1.6353e-09	0.29858	0.513468	0.00779262	0.180159
595.629	1.6354e-09	0.29853	0.513546	0.00779478	0.180129
596.018	1.63549e-09	0.29848	0.513624	0.00779691	0.180099
596.407	1.63558e-09	0.29843	0.513703	0.00779901	0.180069
596.796	1.63567e-09	0.29838	0.513781	0.00780108	0.180038
597.186	1.63576e-09	0.298329	0.513859	0.00780312	0.180008
597.575	1.63585e-09	0.298279	0.513938	0.00780513	0.179978
597.965	1.63594e-09	0.298229	0.514016	0.00780711	0.179948
598.355	1.63604e-09	0.298179	0.514095	0.00780905	0.179917
598.744	1.63695e-09	0.298662	0.513398	0.0077995	0.180141
599.132	1.63704e-09	0.298612	0.513476	0.00780167	0.18011
599.521	1.63713e-09	0.298562	0.513554	0.00780382	0.18008
599.909	1.63723e-09	0.298512	0.513632	0.00780593	0.18005
600.299	1.63732e-09	0.298462	0.51371	0.00780801	0.18002

## Sheet: gh
Time (s)	d_p (m)	H2O (wt %)	H2SO4 (wt %)	HNO3 (wt %)	NH3 (wt %)
5.98972	1.37863e-09	0.2536	0.4974	0.0607	0.1883
6.0154	1.37875e-09	0.2536	0.4973	0.0609	0.1883
6.04119	1.37892e-09	0.253	0.4971	0.0611	0.1888
6.06709	1.37904e-09	0.2529	0.497	0.0614	0.1888
6.0931	1.37917e-09	0.2529	0.4968	0.0616	0.1887
6.11922	1.37929e-09	0.2528	0.4967	0.0618	0.1887
6.14546	1.37941e-09	0.2527	0.4966	0.0621	0.1886
6.17181	1.37953e-09	0.2527	0.4965	0.0623	0.1886
6.19827	1.37966e-09	0.2526	0.4964	0.0625	0.1885
6.22485	1.37978e-09	0.2525	0.4962	0.0628	0.1885
6.25153	1.37991e-09	0.2525	0.4961	0.063	0.1884
6.27834	1.38001e-09	0.2517	0.496	0.0633	0.189
6.30526	1.38014e-09	0.2516	0.4959	0.0635	0.189
6.33229	1.38027e-09	0.2515	0.4958	0.0637	0.1889
6.35944	1.38039e-09	0.2515	0.4957	0.064	0.1889
6.3867	1.38052e-09	0.2514	0.4955	0.0642	0.1888
6.41409	1.38065e-09	0.2513	0.4954	0.0645	0.1888
6.44159	1.38078e-09	0.2513	0.4953	0.0647	0.1887
6.46921	1.38091e-09	0.2512	0.4952	0.065	0.1887
6.49694	1.38103e-09	0.2511	0.495	0.0652	0.1886
6.5248	1.38115e-09	0.2503	0.4949	0.0655	0.1893
6.55277	1.38128e-09	0.2503	0.4948	0.0657	0.1892
6.58087	1.38141e-09	0.2502	0.4947	0.066	0.1892
6.60908	1.38154e-09	0.2501	0.4946	0.0662	0.1891
6.63742	1.38167e-09	0.25	0.4944	0.0665	0.1891
6.66588	1.3818e-09	0.25	0.4943	0.0667	0.189
6.69446	1.38194e-09	0.2499	0.4942	0.067	0.1889
6.72316	1.38207e-09	0.2498	0.4941	0.0672	0.1889
6.75198	1.3822e-09	0.2498	0.4939	0.0675	0.1888
6.78093	1.38231e-09	0.249	0.4938	0.0677	0.1895
6.81001	1.38245e-09	0.2489	0.4937	0.068	0.1894
6.8392	1.38258e-09	0.2488	0.4936	0.0683	0.1894
6.86853	1.38272e-09	0.2487	0.4934	0.0685	0.1893
6.89798	1.38286e-09	0.2487	0.4933	0.0688	0.1893
6.92755	1.38299e-09	0.2486	0.4932	0.069	0.1892
6.95725	1.38313e-09	0.2485	0.493	0.0693	0.1891
6.98708	1.38327e-09	0.2484	0.4929	0.0696	0.1891
7.01704	1.38341e-09	0.2484	0.4928	0.0698	0.189
7.04712	1.38343e-09	0.2473	0.4928	0.0701	0.1898
7.07734	1.38357e-09	0.2473	0.4926	0.0704	0.1897
7.10768	1.38371e-09	0.2472	0.4925	0.0706	0.1897
7.13816	1.38385e-09	0.2471	0.4924	0.0709	0.1896
7.16876	1.38399e-09	0.247	0.4922	0.0712	0.1895
7.1995	1.38413e-09	0.247	0.4921	0.0715	0.1895
7.23036	1.38427e-09	0.2469	0.492	0.0717	0.1894
7.26136	1.38442e-09	0.2468	0.4918	0.072	0.1894
7.2925	1.38456e-09	0.2467	0.4917	0.0723	0.1893
7.32376	1.38474e-09	0.246	0.4915	0.0725	0.19
7.35516	1.38488e-09	0.2459	0.4914	0.0728	0.1899
7.3867	1.38503e-09	0.2458	0.4912	0.0731	0.1899
7.41837	1.38518e-09	0.2457	0.4911	0.0734	0.1898
7.45018	1.38532e-09	0.2457	0.491	0.0736	0.1897
7.48212	1.38547e-09	0.2456	0.4908	0.0739	0.1897
7.5142	1.38562e-09	0.2455	0.4907	0.0742	0.1896
7.54641	1.38576e-09	0.2454	0.4905	0.0745	0.1896
7.57877	1.38591e-09	0.2453	0.4904	0.0748	0.1895
7.61126	1.38596e-09	0.2443	0.4904	0.0751	0.1903
7.6439	1.38611e-09	0.2442	0.4902	0.0753	0.1902
7.67667	1.38626e-09	0.2442	0.4901	0.0756	0.1901
7.70958	1.38641e-09	0.2441	0.4899	0.0759	0.1901
7.74264	1.38656e-09	0.244	0.4898	0.0762	0.19
7.77583	1.38672e-09	0.2439	0.4897	0.0765	0.1899
7.80917	1.38687e-09	0.2438	0.4895	0.0768	0.1899
7.84265	1.38702e-09	0.2438	0.4894	0.0771	0.1898
7.87628	1.38718e-09	0.2437	0.4892	0.0773	0.1898
7.91005	1.38725e-09	0.2427	0.4892	0.0776	0.1905
7.94396	1.38741e-09	0.2426	0.489	0.0779	0.1905
7.97802	1.38757e-09	0.2425	0.4889	0.0782	0.1904
8.01223	1.38772e-09	0.2424	0.4887	0.0785	0.1903
8.04658	1.38788e-09	0.2423	0.4886	0.0788	0.1903
8.08108	1.38804e-09	0.2422	0.4884	0.0791	0.1902
8.11573	1.3882e-09	0.2422	0.4883	0.0794	0.1901
8.15052	1.38835e-09	0.2421	0.4881	0.0797	0.1901
8.18547	1.38851e-09	0.242	0.488	0.08	0.19
8.22056	1.38862e-09	0.241	0.4879	0.0803	0.1908
8.25581	1.38878e-09	0.2409	0.4877	0.0806	0.1907
8.2912	1.38894e-09	0.2408	0.4876	0.0809	0.1907
8.32675	1.3891e-09	0.2407	0.4874	0.0812	0.1906
8.36245	1.38927e-09	0.2407	0.4873	0.0815	0.1905
8.39831	1.38943e-09	0.2406	0.4871	0.0818	0.1905
8.43431	1.38959e-09	0.2405	0.487	0.0821	0.1904
8.47048	1.38976e-09	0.2404	0.4868	0.0824	0.1903
8.50679	1.38992e-09	0.2403	0.4867	0.0828	0.1903
8.54327	1.39003e-09	0.2393	0.4866	0.0831	0.1911
8.5799	1.3902e-09	0.2392	0.4864	0.0834	0.191
8.61668	1.39037e-09	0.2391	0.4863	0.0837	0.1909
8.65362	1.39053e-09	0.239	0.4861	0.084	0.1909
8.69073	1.3907e-09	0.2389	0.4859	0.0843	0.1908
8.72799	1.39087e-09	0.2389	0.4858	0.0846	0.1907
8.76541	1.39104e-09	0.2388	0.4856	0.085	0.1906
8.80299	1.39121e-09	0.2387	0.4855	0.0853	0.1906
8.84073	1.39138e-09	0.2386	0.4853	0.0856	0.1905
8.87864	1.39142e-09	0.2374	0.4853	0.0859	0.1914
8.9167	1.39159e-09	0.2373	0.4851	0.0863	0.1914
8.95493	1.39177e-09	0.2372	0.485	0.0866	0.1913
8.99333	1.39194e-09	0.2371	0.4848	0.0869	0.1912
9.03189	1.39212e-09	0.237	0.4846	0.0872	0.1911
9.07061	1.39229e-09	0.2369	0.4845	0.0875	0.1911
9.1095	1.39247e-09	0.2368	0.4843	0.0879	0.191
9.14856	1.39265e-09	0.2367	0.4842	0.0882	0.1909
9.18778	1.39282e-09	0.2366	0.484	0.0885	0.1908
9.22717	1.39284e-09	0.2354	0.484	0.0889	0.1918
9.26674	1.39302e-09	0.2353	0.4838	0.0892	0.1917
9.30647	1.3932e-09	0.2352	0.4837	0.0896	0.1916
9.34637	1.39338e-09	0.2351	0.4835	0.0899	0.1915
9.38644	1.39356e-09	0.235	0.4833	0.0902	0.1915
9.42668	1.39375e-09	0.2349	0.4832	0.0906	0.1914
9.4671	1.39393e-09	0.2348	0.483	0.0909	0.1913
9.50769	1.39411e-09	0.2347	0.4828	0.0912	0.1912
9.54846	1.3943e-09	0.2346	0.4826	0.0916	0.1912
9.58939	1.39435e-09	0.2334	0.4826	0.0919	0.1921
9.63051	1.39453e-09	0.2333	0.4824	0.0923	0.192
9.6718	1.39472e-09	0.2332	0.4823	0.0926	0.1919
9.71327	1.39491e-09	0.2331	0.4821	0.093	0.1919
9.75491	1.3951e-09	0.233	0.4819	0.0933	0.1918
9.79674	1.39528e-09	0.2329	0.4818	0.0936	0.1917
9.83874	1.39547e-09	0.2328	0.4816	0.094	0.1916
9.88092	1.39566e-09	0.2327	0.4814	0.0943	0.1916
9.92329	1.39585e-09	0.2326	0.4812	0.0947	0.1915
9.96583	1.39588e-09	0.2313	0.4812	0.0951	0.1924
10.0086	1.39607e-09	0.2312	0.481	0.0954	0.1923
10.0515	1.39627e-09	0.2311	0.4809	0.0958	0.1922
10.0946	1.39646e-09	0.231	0.4807	0.0961	0.1922
10.1378	1.39666e-09	0.2309	0.4805	0.0965	0.1921
10.1813	1.39685e-09	0.2308	0.4803	0.0968	0.192
10.225	1.39705e-09	0.2307	0.4802	0.0972	0.1919
10.2688	1.39725e-09	0.2306	0.48	0.0976	0.1918
10.3128	1.39744e-09	0.2305	0.4798	0.0979	0.1918
10.357	1.39742e-09	0.229	0.4798	0.0983	0.1928
10.4015	1.39762e-09	0.2289	0.4797	0.0987	0.1928
10.446	1.39782e-09	0.2288	0.4795	0.0991	0.1927
10.4908	1.39802e-09	0.2287	0.4793	0.0994	0.1926
10.5358	1.39822e-09	0.2286	0.4791	0.0998	0.1925
10.581	1.39842e-09	0.2285	0.4789	0.1002	0.1924
10.6264	1.39863e-09	0.2284	0.4787	0.1005	0.1923
10.6719	1.39883e-09	0.2283	0.4786	0.1009	0.1923
10.7177	1.39904e-09	0.2282	0.4784	0.1013	0.1922
10.7636	1.39899e-09	0.2266	0.4784	0.1017	0.1932
10.8098	1.3992e-09	0.2265	0.4782	0.1021	0.1932
10.8561	1.39941e-09	0.2264	0.4781	0.1025	0.1931
10.9027	1.39962e-09	0.2263	0.4779	0.1028	0.193
10.9494	1.39983e-09	0.2262	0.4777	0.1032	0.1929
10.9964	1.40004e-09	0.2261	0.4775	0.1036	0.1928
11.0435	1.40025e-09	0.226	0.4773	0.104	0.1927
11.0908	1.40046e-09	0.2259	0.4771	0.1043	0.1926
11.1384	1.40067e-09	0.2258	0.4769	0.1047	0.1926
11.1862	1.40052e-09	0.224	0.4771	0.1052	0.1938
11.2341	1.40073e-09	0.2239	0.4769	0.1056	0.1937
11.2823	1.40095e-09	0.2237	0.4767	0.106	0.1936
11.3307	1.40116e-09	0.2236	0.4765	0.1064	0.1935
11.3792	1.40138e-09	0.2235	0.4763	0.1068	0.1934
11.428	1.4016e-09	0.2234	0.4761	0.1071	0.1933
11.477	1.40182e-09	0.2233	0.4759	0.1075	0.1932
11.5262	1.40204e-09	0.2232	0.4757	0.1079	0.1931
11.5756	1.40226e-09	0.2231	0.4755	0.1083	0.193
11.6253	1.40224e-09	0.2215	0.4756	0.1088	0.1941
11.6751	1.40247e-09	0.2214	0.4754	0.1092	0.1941
11.7252	1.40269e-09	0.2213	0.4752	0.1096	0.194
11.7754	1.40292e-09	0.2212	0.475	0.11	0.1939
11.8259	1.40314e-09	0.2211	0.4748	0.1104	0.1938
11.8766	1.40337e-09	0.221	0.4746	0.1108	0.1937
11.9276	1.40359e-09	0.2209	0.4743	0.1112	0.1936
11.9787	1.40382e-09	0.2208	0.4741	0.1116	0.1935
12.0301	1.40405e-09	0.2207	0.4739	0.112	0.1934
12.0816	1.40392e-09	0.2188	0.4741	0.1125	0.1946
12.1334	1.40415e-09	0.2187	0.4739	0.1129	0.1945
12.1855	1.40438e-09	0.2186	0.4737	0.1133	0.1944
12.2377	1.40461e-09	0.2184	0.4735	0.1137	0.1943
12.2902	1.40485e-09	0.2183	0.4733	0.1141	0.1942
12.3429	1.40508e-09	0.2182	0.4731	0.1146	0.1941
12.3958	1.40531e-09	0.2181	0.4729	0.115	0.1941
12.4489	1.40555e-09	0.218	0.4726	0.1154	0.194
12.5023	1.40579e-09	0.2179	0.4724	0.1158	0.1939
12.5559	1.40552e-09	0.2157	0.4727	0.1164	0.1952
12.6097	1.40576e-09	0.2156	0.4725	0.1168	0.1951
12.6638	1.406e-09	0.2154	0.4723	0.1172	0.195
12.7181	1.40624e-09	0.2153	0.4721	0.1176	0.1949
12.7726	1.40648e-09	0.2152	0.4719	0.1181	0.1948
12.8274	1.40673e-09	0.2151	0.4717	0.1185	0.1947
12.8824	1.40697e-09	0.215	0.4714	0.1189	0.1946
12.9376	1.40722e-09	0.2149	0.4712	0.1194	0.1945
12.9931	1.40746e-09	0.2148	0.471	0.1198	0.1944
13.0488	1.40731e-09	0.2128	0.4712	0.1203	0.1957
13.1047	1.40756e-09	0.2127	0.471	0.1208	0.1956
13.1609	1.40781e-09	0.2126	0.4707	0.1212	0.1955
13.2174	1.40806e-09	0.2124	0.4705	0.1216	0.1954
13.274	1.40832e-09	0.2123	0.4703	0.1221	0.1953
13.3309	1.40857e-09	0.2122	0.4701	0.1225	0.1952
13.3881	1.40882e-09	0.2121	0.4698	0.123	0.1951
13.4455	1.40908e-09	0.212	0.4696	0.1234	0.195
13.5031	1.40933e-09	0.2119	0.4694	0.1239	0.1949
13.561	1.40892e-09	0.2093	0.4698	0.1245	0.1964
13.6192	1.40917e-09	0.2091	0.4696	0.1249	0.1963
13.6776	1.40943e-09	0.209	0.4694	0.1254	0.1962
13.7362	1.40969e-09	0.2089	0.4692	0.1259	0.1961
13.7951	1.40995e-09	0.2088	0.4689	0.1263	0.196
13.8543	1.41022e-09	0.2087	0.4687	0.1268	0.1959
13.9137	1.41048e-09	0.2086	0.4685	0.1272	0.1958
13.9733	1.41074e-09	0.2084	0.4682	0.1277	0.1956
14.0332	1.41101e-09	0.2083	0.468	0.1281	0.1955
14.0934	1.41073e-09	0.2059	0.4683	0.1288	0.197
14.1538	1.411e-09	0.2058	0.4681	0.1292	0.1969
14.2145	1.41127e-09	0.2057	0.4678	0.1297	0.1968
14.2754	1.41154e-09	0.2056	0.4676	0.1302	0.1967
14.3366	1.41181e-09	0.2055	0.4674	0.1306	0.1965
14.3981	1.41208e-09	0.2054	0.4671	0.1311	0.1964
14.4598	1.41236e-09	0.2052	0.4669	0.1316	0.1963
14.5218	1.41263e-09	0.2051	0.4666	0.132	0.1962
14.5841	1.41291e-09	0.205	0.4664	0.1325	0.1961
14.6466	1.41245e-09	0.2022	0.4669	0.1332	0.1977
14.7094	1.41273e-09	0.2021	0.4666	0.1337	0.1976
14.7725	1.41301e-09	0.202	0.4664	0.1342	0.1975
14.8358	1.41329e-09	0.2019	0.4661	0.1346	0.1973
14.8994	1.41357e-09	0.2017	0.4659	0.1351	0.1972
14.9633	1.41386e-09	0.2016	0.4657	0.1356	0.1971
15.0275	1.41414e-09	0.2015	0.4654	0.1361	0.197
15.0919	1.41442e-09	0.2014	0.4652	0.1366	0.1969
15.1566	1.41471e-09	0.2013	0.4649	0.1371	0.1968
15.2216	1.41405e-09	0.198	0.4656	0.1379	0.1985
15.2869	1.41434e-09	0.1979	0.4653	0.1383	0.1984
15.3524	1.41463e-09	0.1978	0.4651	0.1388	0.1983
15.4182	1.41493e-09	0.1977	0.4648	0.1393	0.1982
15.4843	1.41522e-09	0.1975	0.4646	0.1398	0.198
15.5507	1.41551e-09	0.1974	0.4643	0.1403	0.1979
15.6174	1.41581e-09	0.1973	0.4641	0.1408	0.1978
15.6843	1.4161e-09	0.1972	0.4638	0.1413	0.1977
15.7516	1.4164e-09	0.197	0.4636	0.1419	0.1975
15.8191	1.4157e-09	0.1937	0.4643	0.1427	0.1994
15.8869	1.416e-09	0.1936	0.464	0.1432	0.1992
15.9551	1.41631e-09	0.1935	0.4637	0.1437	0.1991
16.0235	1.41661e-09	0.1933	0.4635	0.1442	0.199
16.0922	1.41691e-09	0.1932	0.4632	0.1447	0.1988
16.1612	1.41722e-09	0.1931	0.463	0.1452	0.1987
16.2305	1.41753e-09	0.193	0.4627	0.1458	0.1986
16.3	1.41783e-09	0.1928	0.4624	0.1463	0.1985
16.3699	1.41814e-09	0.1927	0.4622	0.1468	0.1983
16.4401	1.41742e-09	0.1892	0.4629	0.1476	0.2002
16.5106	1.41773e-09	0.1891	0.4626	0.1482	0.2001
16.5814	1.41804e-09	0.189	0.4624	0.1487	0.2
16.6525	1.41836e-09	0.1888	0.4621	0.1492	0.1998
16.7239	1.41868e-09	0.1887	0.4618	0.1498	0.1997
16.7956	1.41899e-09	0.1886	0.4616	0.1503	0.1996
16.8676	1.41931e-09	0.1885	0.4613	0.1508	0.1994
16.9399	1.41963e-09	0.1883	0.461	0.1514	0.1993
17.0125	1.41995e-09	0.1882	0.4607	0.1519	0.1991
17.0855	1.41893e-09	0.1841	0.4618	0.1529	0.2012
17.1587	1.41926e-09	0.184	0.4615	0.1534	0.2011
17.2323	1.41959e-09	0.1839	0.4612	0.154	0.201
17.3062	1.41991e-09	0.1837	0.4609	0.1545	0.2008
17.3804	1.42024e-09	0.1836	0.4606	0.1551	0.2007
17.4549	1.42057e-09	0.1835	0.4604	0.1556	0.2005
17.5297	1.4209e-09	0.1834	0.4601	0.1562	0.2004
17.6049	1.42124e-09	0.1832	0.4598	0.1567	0.2003
17.6804	1.42157e-09	0.1831	0.4595	0.1573	0.2001
17.7562	1.42021e-09	0.1783	0.4609	0.1584	0.2024
17.8323	1.42055e-09	0.1782	0.4606	0.159	0.2023
17.9088	1.42089e-09	0.1781	0.4603	0.1595	0.2021
17.9856	1.42123e-09	0.1779	0.46	0.1601	0.202
18.0627	1.42157e-09	0.1778	0.4597	0.1607	0.2018
18.1401	1.42192e-09	0.1777	0.4594	0.1612	0.2017
18.2179	1.42226e-09	0.1775	0.4591	0.1618	0.2015
18.296	1.42261e-09	0.1774	0.4588	0.1624	0.2014
18.3744	1.42296e-09	0.1773	0.4585	0.163	0.2012
18.4532	1.42144e-09	0.1721	0.46	0.1642	0.2037
18.5323	1.4218e-09	0.172	0.4597	0.1648	0.2035
18.6118	1.42215e-09	0.1719	0.4594	0.1653	0.2034
18.6916	1.42251e-09	0.1717	0.4591	0.1659	0.2032
18.7717	1.42286e-09	0.1716	0.4588	0.1665	0.2031
18.8522	1.42322e-09	0.1715	0.4585	0.1671	0.2029
18.933	1.42358e-09	0.1714	0.4582	0.1677	0.2027
19.0142	1.42394e-09	0.1712	0.4579	0.1683	0.2026
19.0957	1.4243e-09	0.1711	0.4576	0.1689	0.2024
19.1776	1.42257e-09	0.1655	0.4593	0.1702	0.205
19.2598	1.42294e-09	0.1653	0.459	0.1708	0.2048
19.3424	1.42331e-09	0.1652	0.4587	0.1714	0.2047
19.4253	1.42368e-09	0.1651	0.4584	0.172	0.2045
19.5086	1.42405e-09	0.165	0.458	0.1726	0.2044
19.5923	1.42442e-09	0.1648	0.4577	0.1732	0.2042
19.6763	1.4248e-09	0.1647	0.4574	0.1739	0.204
19.7606	1.42517e-09	0.1646	0.4571	0.1745	0.2039
19.8454	1.42555e-09	0.1644	0.4568	0.1751	0.2037
19.9304	1.42293e-09	0.157	0.4593	0.1768	0.2068
20.0159	1.42332e-09	0.1569	0.459	0.1774	0.2066
20.1017	1.4237e-09	0.1568	0.4587	0.1781	0.2065
20.1879	1.42409e-09	0.1567	0.4583	0.1787	0.2063
20.2745	1.42448e-09	0.1565	0.458	0.1793	0.2061
20.3614	1.42487e-09	0.1564	0.4577	0.1799	0.206
20.4487	1.42526e-09	0.1563	0.4573	0.1806	0.2058
20.5363	1.42565e-09	0.1561	0.457	0.1812	0.2056
20.6244	1.42604e-09	0.156	0.4567	0.1818	0.2055
20.7128	1.42287e-09	0.1475	0.4598	0.1839	0.2089
20.8016	1.42327e-09	0.1474	0.4595	0.1845	0.2087
20.8908	1.42367e-09	0.1472	0.4591	0.1851	0.2085
20.9804	1.42408e-09	0.1471	0.4588	0.1858	0.2083
21.0703	1.42448e-09	0.147	0.4584	0.1864	0.2082
21.1607	1.42489e-09	0.1469	0.4581	0.1871	0.208
21.2514	1.4253e-09	0.1467	0.4577	0.1877	0.2078
21.3425	1.42571e-09	0.1466	0.4574	0.1884	0.2076
21.434	1.42612e-09	0.1465	0.457	0.1891	0.2074
21.5259	1.42146e-09	0.1351	0.4616	0.1918	0.2116
21.6182	1.42188e-09	0.1349	0.4612	0.1924	0.2114
21.7109	1.4223e-09	0.1348	0.4609	0.1931	0.2112
21.804	1.42273e-09	0.1347	0.4605	0.1938	0.211
21.8975	1.42315e-09	0.1346	0.4601	0.1944	0.2108
21.9914	1.42358e-09	0.1345	0.4598	0.1951	0.2107
22.0856	1.42401e-09	0.1343	0.4594	0.1958	0.2105
22.1803	1.42444e-09	0.1342	0.459	0.1965	0.2103
22.2754	1.42487e-09	0.1341	0.4587	0.1972	0.2101
22.3709	1.41886e-09	0.1199	0.4646	0.2006	0.215
22.4668	1.4193e-09	0.1198	0.4642	0.2013	0.2148
22.5632	1.41975e-09	0.1197	0.4638	0.202	0.2146
22.6599	1.42019e-09	0.1195	0.4634	0.2027	0.2144
22.7571	1.42064e-09	0.1194	0.463	0.2034	0.2142
22.8546	1.42109e-09	0.1193	0.4626	0.2041	0.214
22.9526	1.42154e-09	0.1192	0.4622	0.2048	0.2138
23.051	1.42199e-09	0.1191	0.4618	0.2055	0.2136
23.1499	1.42245e-09	0.119	0.4615	0.2062	0.2134
23.2491	1.41432e-09	0.1004	0.4695	0.2107	0.2194
23.3488	1.41479e-09	0.1003	0.4691	0.2114	0.2192
23.4489	1.41526e-09	0.1002	0.4687	0.2122	0.2189
23.5494	1.41573e-09	0.1001	0.4683	0.2129	0.2187
23.6504	1.4162e-09	0.1	0.4678	0.2136	0.2185
23.7518	1.41667e-09	0.0999	0.4674	0.2144	0.2183
23.8536	1.41715e-09	0.0998	0.467	0.2151	0.2181
23.9559	1.41763e-09	0.0997	0.4666	0.2158	0.2179
24.0586	1.4181e-09	0.0996	0.4662	0.2166	0.2176
24.1618	1.41078e-09	0.0819	0.4735	0.221	0.2236
24.2654	1.41127e-09	0.0818	0.4731	0.2217	0.2234
24.3694	1.41177e-09	0.0818	0.4726	0.2225	0.2231
24.4739	1.41226e-09	0.0817	0.4722	0.2232	0.2229
24.5788	1.41276e-09	0.0816	0.4717	0.224	0.2227
24.6842	1.41326e-09	0.0815	0.4713	0.2248	0.2224
24.79	1.41376e-09	0.0814	0.4709	0.2255	0.2222
24.8963	1.41426e-09	0.0813	0.4704	0.2263	0.2219
25.0031	1.41476e-09	0.0812	0.47	0.2271	0.2217
25.1103	1.41121e-09	0.0706	0.4736	0.2298	0.226
25.2179	1.41172e-09	0.0705	0.4731	0.2306	0.2257
25.326	1.41223e-09	0.0704	0.4727	0.2314	0.2255
25.4346	1.41275e-09	0.0704	0.4722	0.2322	0.2252
25.5437	1.41327e-09	0.0703	0.4717	0.233	0.225
25.6532	1.41379e-09	0.0702	0.4713	0.2337	0.2248
25.7632	1.41431e-09	0.0701	0.4708	0.2345	0.2245
25.8736	1.41483e-09	0.0701	0.4703	0.2353	0.2243
25.9846	1.41536e-09	0.07	0.4699	0.2361	0.224
26.096	1.41376e-09	0.063	0.4715	0.238	0.2275
26.2079	1.41429e-09	0.0629	0.4711	0.2388	0.2272
26.3202	1.41482e-09	0.0629	0.4706	0.2396	0.2269
26.4331	1.41536e-09	0.0628	0.4701	0.2404	0.2267
26.5464	1.4159e-09	0.0627	0.4696	0.2412	0.2264
26.6602	1.41644e-09	0.0626	0.4692	0.242	0.2262
26.7745	1.41698e-09	0.0626	0.4687	0.2428	0.2259
26.8893	1.41752e-09	0.0625	0.4682	0.2436	0.2256
27.0046	1.41807e-09	0.0624	0.4677	0.2444	0.2254
27.1204	1.41754e-09	0.0574	0.4683	0.2458	0.2284
27.2367	1.41809e-09	0.0574	0.4678	0.2466	0.2282
27.3535	1.41865e-09	0.0573	0.4673	0.2475	0.2279
27.4707	1.4192e-09	0.0572	0.4668	0.2483	0.2276
27.5885	1.41976e-09	0.0572	0.4663	0.2491	0.2274
27.7068	1.42032e-09	0.0571	0.4659	0.2499	0.2271
27.8256	1.42088e-09	0.057	0.4654	0.2508	0.2268
27.9449	1.42144e-09	0.057	0.4649	0.2516	0.2266
28.0647	1.42201e-09	0.0569	0.4644	0.2524	0.2263
28.185	1.42219e-09	0.0532	0.4643	0.2535	0.2291
28.3059	1.42276e-09	0.0531	0.4638	0.2543	0.2288
28.4272	1.42333e-09	0.053	0.4633	0.2551	0.2285
28.5491	1.4239e-09	0.053	0.4628	0.256	0.2283
28.6715	1.42448e-09	0.0529	0.4623	0.2568	0.228
28.7945	1.42506e-09	0.0528	0.4618	0.2577	0.2277
28.9179	1.42564e-09	0.0528	0.4613	0.2585	0.2274
29.0419	1.42622e-09	0.0527	0.4608	0.2594	0.2272
29.1664	1.42681e-09	0.0526	0.4603	0.2602	0.2269
29.2915	1.42748e-09	0.0498	0.4597	0.261	0.2295
29.417	1.42807e-09	0.0497	0.4592	0.2619	0.2293
29.5432	1.42866e-09	0.0496	0.4587	0.2627	0.229
29.6698	1.42925e-09	0.0496	0.4582	0.2636	0.2287
29.797	1.42985e-09	0.0495	0.4577	0.2644	0.2284
29.9248	1.43045e-09	0.0494	0.4571	0.2653	0.2281
30.0531	1.43105e-09	0.0494	0.4566	0.2661	0.2278
30.182	1.43165e-09	0.0493	0.4561	0.267	0.2275
30.3114	1.43225e-09	0.0493	0.4556	0.2679	0.2273
30.4413	1.43328e-09	0.047	0.4547	0.2685	0.2298
30.5718	1.43389e-09	0.0469	0.4542	0.2694	0.2295
30.7029	1.4345e-09	0.0469	0.4537	0.2702	0.2292
30.8345	1.43512e-09	0.0468	0.4532	0.2711	0.2289
30.9667	1.43573e-09	0.0467	0.4526	0.272	0.2287
31.0995	1.43635e-09	0.0467	0.4521	0.2728	0.2284
31.2329	1.43697e-09	0.0466	0.4516	0.2737	0.2281
31.3668	1.43759e-09	0.0465	0.4511	0.2746	0.2278
31.5012	1.43822e-09	0.0465	0.4506	0.2755	0.2275
31.6363	1.43954e-09	0.0447	0.4494	0.2759	0.23
31.7719	1.44017e-09	0.0446	0.4489	0.2768	0.2297
31.9082	1.4408e-09	0.0445	0.4484	0.2777	0.2294
32.045	1.44143e-09	0.0445	0.4478	0.2786	0.2291
32.1824	1.44206e-09	0.0444	0.4473	0.2795	0.2288
32.3203	1.4427e-09	0.0444	0.4468	0.2803	0.2285
32.4589	1.44334e-09	0.0443	0.4463	0.2812	0.2282
32.5981	1.44398e-09	0.0443	0.4457	0.2821	0.2279
32.7379	1.44463e-09	0.0442	0.4452	0.283	0.2276
32.8782	1.4462e-09	0.0427	0.4438	0.2834	0.2301
33.0192	1.44685e-09	0.0427	0.4433	0.2843	0.2297
33.1607	1.4475e-09	0.0426	0.4428	0.2852	0.2294
33.3029	1.44815e-09	0.0426	0.4423	0.286	0.2291
33.4457	1.4488e-09	0.0425	0.4417	0.2869	0.2288
33.5891	1.44946e-09	0.0424	0.4412	0.2878	0.2285
33.7331	1.45012e-09	0.0424	0.4407	0.2887	0.2282
33.8777	1.45078e-09	0.0423	0.4401	0.2896	0.2279
34.023	1.45145e-09	0.0423	0.4396	0.2905	0.2276
34.1689	1.45323e-09	0.0411	0.4381	0.2908	0.23
34.3154	1.4539e-09	0.041	0.4375	0.2917	0.2297
34.4625	1.45457e-09	0.041	0.437	0.2926	0.2294
34.6103	1.45524e-09	0.0409	0.4365	0.2935	0.2291
34.7586	1.45592e-09	0.0409	0.4359	0.2944	0.2288
34.9077	1.45659e-09	0.0408	0.4354	0.2953	0.2285
35.0573	1.45727e-09	0.0408	0.4349	0.2962	0.2281
35.2076	1.45796e-09	0.0407	0.4343	0.2971	0.2278
35.3586	1.45864e-09	0.0406	0.4338	0.2981	0.2275
35.5102	1.4606e-09	0.0397	0.4321	0.2982	0.23
35.6624	1.46129e-09	0.0397	0.4316	0.2991	0.2296
35.8153	1.46198e-09	0.0396	0.431	0.3	0.2293
35.9689	1.46268e-09	0.0395	0.4305	0.3009	0.229
36.1231	1.46337e-09	0.0395	0.43	0.3019	0.2287
36.278	1.46407e-09	0.0394	0.4294	0.3028	0.2283
36.4335	1.46477e-09	0.0394	0.4289	0.3037	0.228
36.5897	1.46547e-09	0.0393	0.4284	0.3046	0.2277
36.7466	1.46618e-09	0.0393	0.4278	0.3056	0.2274
36.9042	1.4683e-09	0.0385	0.426	0.3056	0.2298
37.0624	1.46901e-09	0.0385	0.4255	0.3065	0.2295
37.2213	1.46972e-09	0.0384	0.425	0.3075	0.2291
37.3809	1.47043e-09	0.0384	0.4244	0.3084	0.2288
37.5412	1.47115e-09	0.0383	0.4239	0.3093	0.2285
37.7021	1.47187e-09	0.0383	0.4233	0.3102	0.2281
37.8638	1.47259e-09	0.0382	0.4228	0.3112	0.2278
38.0261	1.47331e-09	0.0381	0.4222	0.3121	0.2275
38.1891	1.47404e-09	0.0381	0.4217	0.3131	0.2271
38.3529	1.47635e-09	0.0375	0.4198	0.313	0.2297
38.5173	1.47708e-09	0.0375	0.4193	0.3139	0.2293
38.6824	1.47781e-09	0.0374	0.4187	0.3149	0.229
38.8483	1.47854e-09	0.0373	0.4182	0.3158	0.2287
39.0149	1.47928e-09	0.0373	0.4176	0.3167	0.2283
39.1821	1.48002e-09	0.0372	0.4171	0.3177	0.228
39.3501	1.48076e-09	0.0372	0.4165	0.3186	0.2276
39.5188	1.4815e-09	0.0371	0.416	0.3196	0.2273
39.6883	1.48225e-09	0.0371	0.4155	0.3205	0.2269
39.8584	1.48469e-09	0.0367	0.4135	0.3204	0.2295
40.0293	1.48544e-09	0.0366	0.413	0.3213	0.2291
40.201	1.48619e-09	0.0365	0.4124	0.3223	0.2288
40.3733	1.48695e-09	0.0365	0.4119	0.3232	0.2284
40.5464	1.4877e-09	0.0364	0.4113	0.3242	0.2281
40.7203	1.48847e-09	0.0364	0.4108	0.3251	0.2277
40.8948	1.48923e-09	0.0363	0.4102	0.3261	0.2274
41.0702	1.48999e-09	0.0363	0.4097	0.327	0.227
41.2463	1.49076e-09	0.0362	0.4091	0.328	0.2267
41.4231	1.49335e-09	0.0359	0.4071	0.3277	0.2292
41.6007	1.49412e-09	0.0359	0.4065	0.3287	0.2289
41.7791	1.4949e-09	0.0358	0.406	0.3297	0.2285
41.9582	1.49567e-09	0.0358	0.4054	0.3306	0.2282
42.1381	1.49645e-09	0.0357	0.4049	0.3316	0.2278
42.3188	1.49724e-09	0.0357	0.4044	0.3325	0.2274
42.5002	1.49802e-09	0.0356	0.4038	0.3335	0.2271
42.6824	1.49881e-09	0.0355	0.4033	0.3345	0.2267
42.8654	1.4996e-09	0.0355	0.4027	0.3354	0.2264
43.0492	1.5023e-09	0.0353	0.4006	0.3351	0.2289
43.2338	1.50309e-09	0.0353	0.4001	0.3361	0.2285
43.4191	1.50389e-09	0.0352	0.3995	0.337	0.2282
43.6053	1.50469e-09	0.0352	0.399	0.338	0.2278
43.7922	1.50549e-09	0.0351	0.3984	0.339	0.2275
43.98	1.50629e-09	0.0351	0.3979	0.3399	0.2271
44.1686	1.5071e-09	0.035	0.3973	0.3409	0.2267
44.3579	1.50791e-09	0.035	0.3968	0.3419	0.2264
44.5481	1.50872e-09	0.0349	0.3962	0.3429	0.226
44.7391	1.51159e-09	0.0349	0.3941	0.3424	0.2286
44.9309	1.5124e-09	0.0348	0.3935	0.3434	0.2282
45.1236	1.51322e-09	0.0348	0.393	0.3444	0.2279
45.317	1.51404e-09	0.0347	0.3924	0.3454	0.2275
45.5113	1.51486e-09	0.0346	0.3919	0.3463	0.2271
45.7065	1.51569e-09	0.0346	0.3913	0.3473	0.2268
45.9024	1.51652e-09	0.0345	0.3908	0.3483	0.2264
46.0992	1.51735e-09	0.0345	0.3902	0.3493	0.226
46.2969	1.51818e-09	0.0344	0.3897	0.3502	0.2256
46.4954	1.5212e-09	0.0345	0.3875	0.3497	0.2283
46.6947	1.52204e-09	0.0344	0.3869	0.3507	0.2279
46.8949	1.52288e-09	0.0344	0.3864	0.3517	0.2276
47.096	1.52372e-09	0.0343	0.3858	0.3527	0.2272
47.2979	1.52457e-09	0.0343	0.3853	0.3536	0.2268
47.5007	1.52542e-09	0.0342	0.3847	0.3546	0.2264
47.7044	1.52627e-09	0.0341	0.3842	0.3556	0.2261
47.9089	1.52712e-09	0.0341	0.3836	0.3566	0.2257
48.1143	1.52798e-09	0.034	0.3831	0.3576	0.2253
48.3206	1.53109e-09	0.0342	0.3808	0.357	0.228
48.5278	1.53195e-09	0.0341	0.3803	0.358	0.2276
48.7358	1.53282e-09	0.0341	0.3797	0.359	0.2272
48.9448	1.53368e-09	0.034	0.3792	0.3599	0.2268
49.1546	1.53455e-09	0.034	0.3787	0.3609	0.2264
49.3654	1.53542e-09	0.0339	0.3781	0.3619	0.226
49.577	1.53629e-09	0.0338	0.3776	0.3629	0.2257
49.7896	1.53717e-09	0.0338	0.377	0.3639	0.2253
50.0031	1.53805e-09	0.0337	0.3765	0.3649	0.2249
50.2175	1.54132e-09	0.034	0.3742	0.3642	0.2276
50.4328	1.5422e-09	0.034	0.3736	0.3652	0.2272
50.649	1.54308e-09	0.0339	0.3731	0.3662	0.2268
50.8661	1.54397e-09	0.0338	0.3725	0.3672	0.2264
51.0842	1.54486e-09	0.0338	0.372	0.3682	0.226
51.3033	1.54576e-09	0.0337	0.3715	0.3692	0.2256
51.5232	1.54666e-09	0.0337	0.3709	0.3702	0.2252
51.7441	1.54756e-09	0.0336	0.3704	0.3712	0.2249
51.966	1.54846e-09	0.0335	0.3698	0.3722	0.2245
52.1888	1.55173e-09	0.0339	0.3676	0.3715	0.227
52.4125	1.55263e-09	0.0338	0.367	0.3725	0.2266
52.6373	1.55354e-09	0.0338	0.3665	0.3735	0.2262
52.8629	1.55446e-09	0.0337	0.366	0.3745	0.2258
53.0896	1.55537e-09	0.0337	0.3654	0.3755	0.2254
53.3172	1.55629e-09	0.0336	0.3649	0.3765	0.225
53.5458	1.55721e-09	0.0335	0.3643	0.3775	0.2246
53.7754	1.55814e-09	0.0335	0.3638	0.3785	0.2242
54.0059	1.55907e-09	0.0334	0.3632	0.3795	0.2238
54.2375	1.56272e-09	0.0339	0.3608	0.3785	0.2268
54.47	1.56365e-09	0.0338	0.3603	0.3795	0.2264
54.7036	1.56459e-09	0.0338	0.3597	0.3805	0.226
54.9381	1.56552e-09	0.0337	0.3592	0.3815	0.2256
55.1736	1.56646e-09	0.0336	0.3586	0.3825	0.2252
55.4102	1.5674e-09	0.0336	0.3581	0.3835	0.2248
55.6478	1.56835e-09	0.0335	0.3576	0.3845	0.2244
55.8864	1.56929e-09	0.0335	0.357	0.3855	0.224
56.126	1.57024e-09	0.0334	0.3565	0.3866	0.2236
56.3666	1.57369e-09	0.0339	0.3542	0.3857	0.2261
56.6083	1.57465e-09	0.0338	0.3537	0.3867	0.2257
56.851	1.57561e-09	0.0338	0.3532	0.3877	0.2253
57.0947	1.57657e-09	0.0337	0.3526	0.3888	0.2249
57.3395	1.57754e-09	0.0337	0.3521	0.3898	0.2245
57.5854	1.57851e-09	0.0336	0.3516	0.3908	0.224
57.8323	1.57948e-09	0.0335	0.351	0.3918	0.2236
58.0802	1.58045e-09	0.0335	0.3505	0.3928	0.2232
58.3292	1.58143e-09	0.0334	0.3499	0.3938	0.2228
58.5793	1.5853e-09	0.034	0.3475	0.3927	0.2258
58.8305	1.58629e-09	0.034	0.347	0.3937	0.2253
59.0827	1.58727e-09	0.0339	0.3464	0.3947	0.2249
59.336	1.58826e-09	0.0339	0.3459	0.3957	0.2245
59.5904	1.58925e-09	0.0338	0.3453	0.3968	0.2241
59.8459	1.59024e-09	0.0337	0.3448	0.3978	0.2237
60.1025	1.59124e-09	0.0337	0.3443	0.3988	0.2232
60.3602	1.59224e-09	0.0336	0.3437	0.3998	0.2228
60.619	1.59324e-09	0.0335	0.3432	0.4008	0.2224
60.8789	1.59715e-09	0.0342	0.3408	0.3997	0.2253
61.1399	1.59816e-09	0.0342	0.3403	0.4007	0.2248
61.402	1.59917e-09	0.0341	0.3397	0.4017	0.2244
61.6653	1.60018e-09	0.0341	0.3392	0.4027	0.224
61.9297	1.6012e-09	0.034	0.3387	0.4037	0.2236
62.1952	1.60222e-09	0.0339	0.3382	0.4048	0.2231
62.4619	1.60324e-09	0.0339	0.3376	0.4058	0.2227
62.7297	1.60427e-09	0.0338	0.3371	0.4068	0.2223
62.9986	1.60529e-09	0.0337	0.3366	0.4078	0.2218
63.2687	1.60958e-09	0.0346	0.334	0.4064	0.225
63.54	1.61061e-09	0.0345	0.3335	0.4074	0.2246
63.8124	1.61164e-09	0.0345	0.333	0.4084	0.2241
64.086	1.61268e-09	0.0344	0.3324	0.4095	0.2237
64.3608	1.61372e-09	0.0343	0.3319	0.4105	0.2233
64.6367	1.61477e-09	0.0343	0.3314	0.4115	0.2228
64.9139	1.61581e-09	0.0342	0.3309	0.4125	0.2224
65.1922	1.61686e-09	0.0341	0.3303	0.4136	0.222
65.4717	1.61792e-09	0.0341	0.3298	0.4146	0.2215
65.7524	1.6221e-09	0.0349	0.3274	0.4132	0.2244
66.0343	1.62316e-09	0.0349	0.3269	0.4142	0.224
66.3174	1.62422e-09	0.0348	0.3263	0.4153	0.2236
66.6018	1.62529e-09	0.0347	0.3258	0.4163	0.2231
66.8873	1.62636e-09	0.0347	0.3253	0.4173	0.2227
67.1741	1.62743e-09	0.0346	0.3248	0.4184	0.2223
67.4621	1.6285e-09	0.0345	0.3243	0.4194	0.2218
67.7513	1.62958e-09	0.0344	0.3237	0.4204	0.2214
68.0418	1.63067e-09	0.0344	0.3232	0.4215	0.2209
68.3335	1.63512e-09	0.0354	0.3207	0.4199	0.224
68.6265	1.6362e-09	0.0353	0.3202	0.4209	0.2235
68.9208	1.63729e-09	0.0353	0.3197	0.422	0.2231
69.2163	1.63839e-09	0.0352	0.3192	0.423	0.2227
69.513	1.63949e-09	0.0351	0.3186	0.424	0.2222
69.8111	1.64059e-09	0.035	0.3181	0.425	0.2218
70.1104	1.64169e-09	0.035	0.3176	0.4261	0.2213
70.411	1.6428e-09	0.0349	0.3171	0.4271	0.2209
70.7128	1.6439e-09	0.0348	0.3166	0.4281	0.2204
71.016	1.64846e-09	0.0359	0.3141	0.4265	0.2235
71.3205	1.64958e-09	0.0358	0.3136	0.4275	0.223
71.6263	1.6507e-09	0.0358	0.3131	0.4286	0.2226
71.9334	1.65182e-09	0.0357	0.3126	0.4296	0.2221
72.2418	1.65295e-09	0.0356	0.3121	0.4306	0.2217
72.5515	1.65408e-09	0.0355	0.3115	0.4317	0.2212
72.8626	1.65521e-09	0.0355	0.311	0.4327	0.2208
73.175	1.65635e-09	0.0354	0.3105	0.4338	0.2203
73.4887	1.65748e-09	0.0353	0.31	0.4348	0.2198
73.8038	1.6622e-09	0.0365	0.3075	0.433	0.2229
74.1202	1.66335e-09	0.0364	0.307	0.4341	0.2225
74.438	1.6645e-09	0.0363	0.3065	0.4351	0.222
74.7572	1.66566e-09	0.0363	0.306	0.4362	0.2216
75.0777	1.66681e-09	0.0362	0.3055	0.4372	0.2211
75.3996	1.66797e-09	0.0361	0.305	0.4382	0.2206
75.7229	1.66913e-09	0.036	0.3045	0.4393	0.2202
76.0475	1.6703e-09	0.036	0.304	0.4403	0.2197
76.3736	1.67147e-09	0.0359	0.3035	0.4414	0.2193
76.701	1.67614e-09	0.0371	0.3011	0.4396	0.2222
77.0299	1.67732e-09	0.037	0.3006	0.4407	0.2217
77.3601	1.6785e-09	0.0369	0.3001	0.4417	0.2212
77.6918	1.67969e-09	0.0368	0.2996	0.4428	0.2208
78.0249	1.68088e-09	0.0368	0.2991	0.4438	0.2203
78.3595	1.68207e-09	0.0367	0.2986	0.4449	0.2198
78.6954	1.68326e-09	0.0366	0.2981	0.4459	0.2194
79.0328	1.68446e-09	0.0365	0.2976	0.447	0.2189
79.3717	1.68566e-09	0.0364	0.2971	0.448	0.2184
79.712	1.69087e-09	0.0379	0.2945	0.4459	0.2217
80.0537	1.69208e-09	0.0378	0.294	0.4469	0.2212
80.397	1.6933e-09	0.0377	0.2935	0.448	0.2208
80.7417	1.69452e-09	0.0376	0.293	0.449	0.2203
81.0878	1.69574e-09	0.0375	0.2925	0.4501	0.2198
81.4355	1.69696e-09	0.0375	0.292	0.4511	0.2193
81.7847	1.69819e-09	0.0374	0.2915	0.4522	0.2189
82.1353	1.69942e-09	0.0373	0.291	0.4532	0.2184
82.4875	1.70065e-09	0.0372	0.2905	0.4543	0.2179
82.8411	1.7059e-09	0.0387	0.288	0.4521	0.2211
83.1963	1.70714e-09	0.0386	0.2875	0.4532	0.2206
83.553	1.70839e-09	0.0385	0.287	0.4543	0.2201
83.9112	1.70964e-09	0.0384	0.2866	0.4553	0.2197
84.271	1.7109e-09	0.0384	0.2861	0.4564	0.2192
84.6323	1.71216e-09	0.0383	0.2856	0.4574	0.2187
84.9952	1.71342e-09	0.0382	0.2851	0.4585	0.2182
85.3596	1.71468e-09	0.0381	0.2846	0.4595	0.2177
85.7256	1.71595e-09	0.038	0.2841	0.4606	0.2173
86.0931	1.72161e-09	0.0397	0.2815	0.4581	0.2206
86.4622	1.72288e-09	0.0396	0.281	0.4592	0.2201
86.8329	1.72417e-09	0.0396	0.2805	0.4602	0.2197
87.2052	1.72545e-09	0.0395	0.28	0.4613	0.2192
87.5791	1.72674e-09	0.0394	0.2796	0.4624	0.2187
87.9546	1.72803e-09	0.0393	0.2791	0.4634	0.2182
88.3317	1.72932e-09	0.0392	0.2786	0.4645	0.2177
88.7104	1.73062e-09	0.0391	0.2781	0.4655	0.2172
89.0908	1.73192e-09	0.039	0.2776	0.4666	0.2167
89.4728	1.73739e-09	0.0406	0.2752	0.4643	0.2199
89.8564	1.73871e-09	0.0405	0.2747	0.4654	0.2194
90.2416	1.74003e-09	0.0404	0.2742	0.4664	0.2189
90.6285	1.74135e-09	0.0404	0.2738	0.4675	0.2184
91.0171	1.74268e-09	0.0403	0.2733	0.4686	0.2179
91.4073	1.74401e-09	0.0402	0.2728	0.4696	0.2174
91.7992	1.74534e-09	0.0401	0.2723	0.4707	0.2169
92.1928	1.74668e-09	0.04	0.2719	0.4718	0.2164
92.5881	1.74802e-09	0.0399	0.2714	0.4728	0.2159
92.9851	1.7539e-09	0.0417	0.2688	0.4702	0.2192
93.3837	1.75526e-09	0.0416	0.2684	0.4713	0.2187
93.7841	1.75662e-09	0.0415	0.2679	0.4724	0.2182
94.1862	1.75798e-09	0.0414	0.2674	0.4734	0.2177
94.59	1.75934e-09	0.0413	0.267	0.4745	0.2172
94.9956	1.76071e-09	0.0413	0.2665	0.4756	0.2167
95.4029	1.76208e-09	0.0412	0.266	0.4767	0.2161
95.8119	1.76346e-09	0.0411	0.2656	0.4777	0.2156
96.2227	1.76484e-09	0.041	0.2651	0.4788	0.2151
96.6353	1.77127e-09	0.0431	0.2624	0.4758	0.2187
97.0496	1.77267e-09	0.043	0.2619	0.4769	0.2182
97.4657	1.77406e-09	0.0429	0.2614	0.4779	0.2177
97.8836	1.77546e-09	0.0428	0.261	0.479	0.2172
98.3032	1.77687e-09	0.0427	0.2605	0.4801	0.2167
98.7247	1.77828e-09	0.0426	0.2601	0.4812	0.2162
99.148	1.77969e-09	0.0425	0.2596	0.4822	0.2156
99.5731	1.7811e-09	0.0424	0.2592	0.4833	0.2151
100	1.78252e-09	0.0423	0.2587	0.4844	0.2146
100.111	1.7879e-09	0.0445	0.2564	0.4806	0.2184
100.221	1.78827e-09	0.0445	0.2563	0.4809	0.2183
100.332	1.78864e-09	0.0445	0.2562	0.4812	0.2182
100.443	1.78901e-09	0.0444	0.2561	0.4814	0.218
100.554	1.78939e-09	0.0444	0.2559	0.4817	0.2179
100.666	1.78976e-09	0.0444	0.2558	0.482	0.2178
100.777	1.79013e-09	0.0444	0.2557	0.4823	0.2176
100.888	1.7905e-09	0.0443	0.2556	0.4826	0.2175
101	1.79087e-09	0.0443	0.2555	0.4828	0.2174
101.383	1.79334e-09	0.0447	0.2546	0.4828	0.2178
101.768	1.79462e-09	0.0447	0.2542	0.4838	0.2174
102.154	1.79591e-09	0.0446	0.2538	0.4848	0.2169
102.542	1.79719e-09	0.0445	0.2534	0.4857	0.2164
102.931	1.79848e-09	0.0444	0.253	0.4867	0.216
103.322	1.79977e-09	0.0443	0.2526	0.4876	0.2155
103.714	1.80107e-09	0.0442	0.2522	0.4886	0.215
104.107	1.80236e-09	0.0441	0.2518	0.4896	0.2146
104.503	1.80366e-09	0.044	0.2514	0.4905	0.2141
104.886	1.8098e-09	0.0462	0.249	0.4875	0.2173
105.271	1.81107e-09	0.0461	0.2486	0.4884	0.2169
105.657	1.81235e-09	0.046	0.2482	0.4894	0.2164
106.045	1.81362e-09	0.0459	0.2478	0.4903	0.2159
106.434	1.8149e-09	0.0458	0.2474	0.4912	0.2155
106.825	1.81618e-09	0.0457	0.2471	0.4922	0.215
107.217	1.81747e-09	0.0456	0.2467	0.4931	0.2146
107.61	1.81875e-09	0.0455	0.2463	0.494	0.2141
108.005	1.82004e-09	0.0454	0.2459	0.495	0.2137
108.389	1.82595e-09	0.0475	0.2437	0.4921	0.2167
108.774	1.82721e-09	0.0474	0.2433	0.493	0.2162
109.16	1.82848e-09	0.0473	0.2429	0.4939	0.2158
109.548	1.82975e-09	0.0472	0.2426	0.4948	0.2153
109.937	1.83102e-09	0.0471	0.2422	0.4958	0.2149
110.328	1.83229e-09	0.047	0.2419	0.4967	0.2144
110.719	1.83357e-09	0.0469	0.2415	0.4976	0.214
111.113	1.83485e-09	0.0468	0.2411	0.4985	0.2135
111.508	1.83613e-09	0.0467	0.2408	0.4994	0.2131
111.891	1.84224e-09	0.049	0.2385	0.4963	0.2161
112.277	1.8435e-09	0.0489	0.2382	0.4972	0.2157
112.663	1.84476e-09	0.0488	0.2378	0.4981	0.2152
113.051	1.84602e-09	0.0487	0.2375	0.499	0.2148
113.44	1.84728e-09	0.0486	0.2371	0.4999	0.2143
113.83	1.84855e-09	0.0485	0.2368	0.5008	0.2139
114.222	1.84981e-09	0.0484	0.2364	0.5017	0.2135
114.615	1.85108e-09	0.0483	0.2361	0.5025	0.213
115.01	1.85236e-09	0.0482	0.2357	0.5034	0.2126
115.394	1.85823e-09	0.0504	0.2337	0.5006	0.2154
115.779	1.85948e-09	0.0503	0.2333	0.5014	0.215
116.166	1.86073e-09	0.0502	0.233	0.5023	0.2145
116.554	1.86199e-09	0.0501	0.2327	0.5032	0.2141
116.943	1.86325e-09	0.05	0.2323	0.504	0.2137
117.333	1.86451e-09	0.0499	0.232	0.5049	0.2132
117.725	1.86577e-09	0.0498	0.2317	0.5058	0.2128
118.118	1.86703e-09	0.0497	0.2313	0.5066	0.2124
118.513	1.8683e-09	0.0496	0.231	0.5075	0.2119
118.897	1.87453e-09	0.052	0.2288	0.5043	0.2149
119.282	1.87578e-09	0.0519	0.2285	0.5051	0.2144
119.669	1.87703e-09	0.0518	0.2282	0.506	0.214
120.057	1.87828e-09	0.0517	0.2279	0.5068	0.2136
120.446	1.87953e-09	0.0516	0.2276	0.5077	0.2132
120.836	1.88078e-09	0.0515	0.2272	0.5085	0.2127
121.228	1.88204e-09	0.0513	0.2269	0.5094	0.2123
121.621	1.8833e-09	0.0512	0.2266	0.5102	0.2119
122.015	1.88456e-09	0.0511	0.2263	0.5111	0.2115
122.399	1.89075e-09	0.0536	0.2242	0.5079	0.2143
122.785	1.89199e-09	0.0535	0.2239	0.5087	0.2139
123.172	1.89323e-09	0.0534	0.2236	0.5096	0.2134
123.559	1.89448e-09	0.0533	0.2233	0.5104	0.213
123.949	1.89572e-09	0.0532	0.223	0.5112	0.2126
124.339	1.89697e-09	0.0531	0.2227	0.512	0.2122
124.731	1.89822e-09	0.053	0.2224	0.5129	0.2118
125.123	1.89948e-09	0.0529	0.2221	0.5137	0.2113
125.518	1.90073e-09	0.0527	0.2218	0.5145	0.2109
125.902	1.90694e-09	0.0552	0.2198	0.5113	0.2137
126.288	1.90817e-09	0.0551	0.2195	0.5121	0.2132
126.674	1.90941e-09	0.055	0.2192	0.513	0.2128
127.062	1.91065e-09	0.0549	0.2189	0.5138	0.2124
127.451	1.91189e-09	0.0548	0.2186	0.5146	0.212
127.842	1.91314e-09	0.0547	0.2183	0.5154	0.2116
128.233	1.91438e-09	0.0546	0.218	0.5162	0.2112
128.626	1.91563e-09	0.0545	0.2177	0.517	0.2108
129.02	1.91688e-09	0.0544	0.2174	0.5178	0.2104
129.405	1.92313e-09	0.0569	0.2154	0.5146	0.213
129.79	1.92436e-09	0.0568	0.2152	0.5154	0.2126
130.177	1.92559e-09	0.0567	0.2149	0.5162	0.2122
130.565	1.92683e-09	0.0566	0.2146	0.517	0.2118
130.954	1.92807e-09	0.0565	0.2143	0.5178	0.2114
131.345	1.92931e-09	0.0564	0.214	0.5186	0.211
131.736	1.93055e-09	0.0563	0.2138	0.5194	0.2106
132.129	1.93179e-09	0.0561	0.2135	0.5202	0.2102
132.523	1.93304e-09	0.056	0.2132	0.521	0.2098
132.907	1.93924e-09	0.0586	0.2113	0.5178	0.2124
133.293	1.94047e-09	0.0585	0.211	0.5185	0.212
133.68	1.9417e-09	0.0584	0.2107	0.5193	0.2116
134.068	1.94294e-09	0.0582	0.2105	0.5201	0.2111
134.457	1.94417e-09	0.0581	0.2102	0.5209	0.2107
134.847	1.94541e-09	0.058	0.2099	0.5217	0.2103
135.239	1.94665e-09	0.0579	0.2097	0.5225	0.2099
135.631	1.94789e-09	0.0578	0.2094	0.5232	0.2095
136.025	1.94913e-09	0.0577	0.2091	0.524	0.2091
136.41	1.95568e-09	0.0605	0.2072	0.5205	0.2118
136.796	1.95691e-09	0.0604	0.2069	0.5213	0.2114
137.183	1.95814e-09	0.0603	0.2066	0.5221	0.211
137.571	1.95937e-09	0.0602	0.2064	0.5228	0.2106
137.96	1.9606e-09	0.0601	0.2061	0.5236	0.2102
138.35	1.96183e-09	0.0599	0.2059	0.5244	0.2098
138.741	1.96307e-09	0.0598	0.2056	0.5251	0.2094
139.134	1.9643e-09	0.0597	0.2053	0.5259	0.209
139.528	1.96554e-09	0.0596	0.2051	0.5267	0.2086
139.912	1.97188e-09	0.0622	0.2032	0.5233	0.2112
140.298	1.97311e-09	0.0621	0.203	0.5241	0.2108
140.685	1.97433e-09	0.062	0.2027	0.5248	0.2104
141.073	1.97556e-09	0.0619	0.2025	0.5256	0.21
141.463	1.97679e-09	0.0618	0.2022	0.5264	0.2096
141.853	1.97802e-09	0.0617	0.202	0.5271	0.2092
142.244	1.97926e-09	0.0616	0.2017	0.5279	0.2088
142.637	1.98049e-09	0.0614	0.2015	0.5286	0.2084
143.03	1.98173e-09	0.0613	0.2013	0.5294	0.208
143.415	1.98832e-09	0.0642	0.1994	0.5258	0.2105
143.801	1.98955e-09	0.0641	0.1991	0.5266	0.2101
144.188	1.99077e-09	0.064	0.1989	0.5273	0.2098
144.576	1.992e-09	0.0639	0.1987	0.5281	0.2094
144.965	1.99322e-09	0.0637	0.1984	0.5288	0.209
145.356	1.99445e-09	0.0636	0.1982	0.5296	0.2086
145.747	1.99568e-09	0.0635	0.1979	0.5303	0.2082
146.139	1.99692e-09	0.0634	0.1977	0.5311	0.2078
146.533	1.99815e-09	0.0633	0.1975	0.5318	0.2074
146.918	2.00476e-09	0.0662	0.1956	0.5283	0.2099
147.304	2.00598e-09	0.0661	0.1954	0.529	0.2095
147.691	2.0072e-09	0.0659	0.1952	0.5297	0.2091
148.079	2.00842e-09	0.0658	0.1949	0.5305	0.2087
148.468	2.00965e-09	0.0657	0.1947	0.5312	0.2084
148.858	2.01088e-09	0.0656	0.1945	0.5319	0.208
149.25	2.01211e-09	0.0655	0.1943	0.5327	0.2076
149.642	2.01334e-09	0.0653	0.194	0.5334	0.2072
150.035	2.01457e-09	0.0652	0.1938	0.5341	0.2068
150.42	2.02092e-09	0.0679	0.1921	0.5308	0.2092
150.806	2.02214e-09	0.0678	0.1919	0.5315	0.2088
151.194	2.02336e-09	0.0677	0.1917	0.5322	0.2084
151.582	2.02458e-09	0.0675	0.1914	0.533	0.208
151.971	2.02581e-09	0.0674	0.1912	0.5337	0.2077
152.361	2.02703e-09	0.0673	0.191	0.5344	0.2073
152.752	2.02826e-09	0.0672	0.1908	0.5351	0.2069
153.144	2.02949e-09	0.0671	0.1905	0.5358	0.2065
153.538	2.03072e-09	0.0669	0.1903	0.5366	0.2062
153.923	2.03773e-09	0.0702	0.1885	0.5327	0.2086
154.309	2.03895e-09	0.07	0.1883	0.5334	0.2083
154.696	2.04017e-09	0.0699	0.1881	0.5341	0.2079
155.084	2.04139e-09	0.0698	0.1878	0.5349	0.2075
155.474	2.04261e-09	0.0696	0.1876	0.5356	0.2071
155.864	2.04384e-09	0.0695	0.1874	0.5363	0.2068
156.255	2.04507e-09	0.0694	0.1872	0.537	0.2064
156.647	2.04629e-09	0.0693	0.187	0.5377	0.206
157.04	2.04752e-09	0.0691	0.1868	0.5384	0.2056
157.425	2.05427e-09	0.0721	0.1851	0.5348	0.208
157.812	2.05549e-09	0.072	0.1849	0.5355	0.2076
158.199	2.05671e-09	0.0719	0.1846	0.5362	0.2073
158.587	2.05793e-09	0.0718	0.1844	0.5369	0.2069
158.976	2.05915e-09	0.0716	0.1842	0.5376	0.2065
159.366	2.06038e-09	0.0715	0.184	0.5383	0.2062
159.758	2.0616e-09	0.0714	0.1838	0.539	0.2058
160.15	2.06283e-09	0.0712	0.1836	0.5397	0.2054
160.543	2.06406e-09	0.0711	0.1834	0.5404	0.2051
160.928	2.0708e-09	0.0741	0.1817	0.5368	0.2073
161.314	2.07201e-09	0.074	0.1815	0.5375	0.207
161.702	2.07323e-09	0.0739	0.1813	0.5382	0.2066
162.09	2.07446e-09	0.0737	0.1811	0.5389	0.2062
162.479	2.07568e-09	0.0736	0.1809	0.5396	0.2059
162.869	2.0769e-09	0.0735	0.1807	0.5403	0.2055
163.26	2.07813e-09	0.0733	0.1805	0.541	0.2051
163.652	2.07936e-09	0.0732	0.1803	0.5416	0.2048
164.045	2.08058e-09	0.0731	0.1801	0.5423	0.2044
164.431	2.08763e-09	0.0763	0.1784	0.5385	0.2067
164.817	2.08885e-09	0.0762	0.1783	0.5392	0.2064
165.204	2.09007e-09	0.0761	0.1781	0.5399	0.206
165.593	2.09129e-09	0.0759	0.1779	0.5406	0.2056
165.982	2.09251e-09	0.0758	0.1777	0.5412	0.2053
166.372	2.09373e-09	0.0757	0.1775	0.5419	0.2049
166.763	2.09496e-09	0.0755	0.1773	0.5426	0.2046
167.155	2.09618e-09	0.0754	0.1771	0.5433	0.2042
167.548	2.09741e-09	0.0753	0.1769	0.544	0.2038
167.933	2.10412e-09	0.0782	0.1753	0.5404	0.206
168.32	2.10534e-09	0.0781	0.1752	0.5411	0.2056
168.707	2.10656e-09	0.078	0.175	0.5418	0.2053
169.095	2.10778e-09	0.0778	0.1748	0.5424	0.2049
169.484	2.109e-09	0.0777	0.1746	0.5431	0.2046
169.874	2.11023e-09	0.0776	0.1744	0.5438	0.2042
170.265	2.11145e-09	0.0774	0.1742	0.5445	0.2039
170.657	2.11268e-09	0.0773	0.174	0.5451	0.2035
171.05	2.11391e-09	0.0772	0.1739	0.5458	0.2031
171.436	2.12101e-09	0.0804	0.1722	0.542	0.2054
171.822	2.12223e-09	0.0803	0.1721	0.5426	0.205
172.21	2.12345e-09	0.0801	0.1719	0.5433	0.2047
172.598	2.12467e-09	0.08	0.1717	0.544	0.2043
172.987	2.12589e-09	0.0799	0.1715	0.5446	0.204
173.377	2.12711e-09	0.0797	0.1713	0.5453	0.2036
173.768	2.12834e-09	0.0796	0.1712	0.546	0.2033
174.16	2.12957e-09	0.0794	0.171	0.5466	0.2029
174.553	2.13079e-09	0.0793	0.1708	0.5473	0.2026
174.938	2.13787e-09	0.0825	0.1692	0.5435	0.2047
175.325	2.13909e-09	0.0824	0.1691	0.5442	0.2044
175.712	2.14031e-09	0.0823	0.1689	0.5448	0.204
176.101	2.14153e-09	0.0821	0.1687	0.5455	0.2037
176.49	2.14275e-09	0.082	0.1685	0.5461	0.2033
176.88	2.14398e-09	0.0818	0.1684	0.5468	0.203
177.271	2.1452e-09	0.0817	0.1682	0.5475	0.2026
177.662	2.14643e-09	0.0816	0.168	0.5481	0.2023
178.055	2.14766e-09	0.0814	0.1678	0.5488	0.2019
178.441	2.15512e-09	0.0849	0.1662	0.5447	0.2042
178.828	2.15634e-09	0.0848	0.1661	0.5453	0.2038
179.215	2.15756e-09	0.0846	0.1659	0.546	0.2035
179.603	2.15878e-09	0.0845	0.1657	0.5467	0.2031
179.992	2.16001e-09	0.0843	0.1655	0.5473	0.2028
180.382	2.16123e-09	0.0842	0.1654	0.548	0.2024
180.773	2.16246e-09	0.084	0.1652	0.5486	0.2021
181.165	2.16368e-09	0.0839	0.1651	0.5493	0.2017
181.558	2.16491e-09	0.0838	0.1649	0.5499	0.2014
181.943	2.17202e-09	0.087	0.1634	0.5461	0.2035
182.33	2.17324e-09	0.0868	0.1632	0.5468	0.2032
182.718	2.17446e-09	0.0867	0.1631	0.5474	0.2028
183.106	2.17568e-09	0.0865	0.1629	0.5481	0.2025
183.495	2.17691e-09	0.0864	0.1627	0.5487	0.2021
183.885	2.17813e-09	0.0862	0.1626	0.5494	0.2018
184.276	2.17936e-09	0.0861	0.1624	0.55	0.2014
184.668	2.18059e-09	0.086	0.1623	0.5507	0.2011
185.06	2.18181e-09	0.0858	0.1621	0.5513	0.2008
185.446	2.18924e-09	0.0892	0.1606	0.5473	0.2029
185.833	2.19046e-09	0.0891	0.1604	0.5479	0.2026
186.22	2.19169e-09	0.0889	0.1603	0.5486	0.2022
186.609	2.19291e-09	0.0888	0.1601	0.5492	0.2019
186.998	2.19413e-09	0.0886	0.1599	0.5498	0.2015
187.388	2.19536e-09	0.0885	0.1598	0.5505	0.2012
187.779	2.19659e-09	0.0883	0.1596	0.5511	0.2009
188.17	2.19782e-09	0.0882	0.1595	0.5518	0.2005
188.563	2.19904e-09	0.0881	0.1593	0.5524	0.2002
188.949	2.20642e-09	0.0914	0.1578	0.5484	0.2023
189.335	2.20765e-09	0.0913	0.1577	0.5491	0.2019
189.723	2.20887e-09	0.0911	0.1575	0.5497	0.2016
190.111	2.21009e-09	0.091	0.1574	0.5503	0.2013
190.5	2.21132e-09	0.0908	0.1572	0.551	0.2009
190.89	2.21255e-09	0.0907	0.1571	0.5516	0.2006
191.281	2.21377e-09	0.0905	0.1569	0.5522	0.2003
191.673	2.215e-09	0.0904	0.1568	0.5529	0.1999
192.065	2.21623e-09	0.0902	0.1566	0.5535	0.1996
192.451	2.22364e-09	0.0936	0.1552	0.5495	0.2017
192.838	2.22486e-09	0.0934	0.155	0.5502	0.2013
193.226	2.22608e-09	0.0933	0.1549	0.5508	0.201
193.614	2.22731e-09	0.0931	0.1547	0.5514	0.2007
194.003	2.22854e-09	0.093	0.1546	0.5521	0.2003
194.393	2.22976e-09	0.0928	0.1545	0.5527	0.2
194.784	2.23099e-09	0.0927	0.1543	0.5533	0.1997
195.175	2.23222e-09	0.0925	0.1542	0.554	0.1993
195.568	2.23345e-09	0.0924	0.154	0.5546	0.199
195.954	2.24088e-09	0.0957	0.1526	0.5506	0.2011
196.341	2.2421e-09	0.0955	0.1525	0.5512	0.2007
196.728	2.24332e-09	0.0954	0.1523	0.5519	0.2004
197.117	2.24455e-09	0.0952	0.1522	0.5525	0.2001
197.506	2.24578e-09	0.0951	0.152	0.5531	0.1997
197.896	2.24701e-09	0.0949	0.1519	0.5537	0.1994
198.286	2.24824e-09	0.0948	0.1518	0.5544	0.1991
198.678	2.24947e-09	0.0946	0.1516	0.555	0.1988
199.07	2.2507e-09	0.0945	0.1515	0.5556	0.1984
199.456	2.25799e-09	0.0977	0.1501	0.5518	0.2004
199.843	2.25921e-09	0.0976	0.15	0.5524	0.2001
200.231	2.26044e-09	0.0974	0.1499	0.553	0.1997
200.619	2.26167e-09	0.0972	0.1497	0.5536	0.1994
201.008	2.2629e-09	0.0971	0.1496	0.5542	0.1991
201.398	2.26413e-09	0.0969	0.1495	0.5549	0.1988
201.789	2.26536e-09	0.0968	0.1493	0.5555	0.1984
202.18	2.26659e-09	0.0966	0.1492	0.5561	0.1981
202.573	2.26782e-09	0.0964	0.149	0.5567	0.1978
202.959	2.27554e-09	0.0999	0.1476	0.5526	0.1998
203.346	2.27677e-09	0.0998	0.1475	0.5532	0.1995
203.733	2.27799e-09	0.0996	0.1474	0.5538	0.1992
204.122	2.27922e-09	0.0994	0.1472	0.5544	0.1989
204.511	2.28045e-09	0.0993	0.1471	0.555	0.1986
204.901	2.28168e-09	0.0991	0.147	0.5556	0.1982
205.292	2.28291e-09	0.099	0.1469	0.5562	0.1979
205.683	2.28414e-09	0.0988	0.1467	0.5569	0.1976
206.075	2.28538e-09	0.0986	0.1466	0.5575	0.1973
206.461	2.293e-09	0.1021	0.1452	0.5534	0.1993
206.848	2.29423e-09	0.1019	0.1451	0.554	0.1989
207.236	2.29546e-09	0.1017	0.145	0.5546	0.1986
207.624	2.29669e-09	0.1016	0.1449	0.5552	0.1983
208.014	2.29792e-09	0.1014	0.1447	0.5559	0.198
208.404	2.29915e-09	0.1012	0.1446	0.5565	0.1977
208.794	2.30038e-09	0.1011	0.1445	0.5571	0.1974
209.185	2.30161e-09	0.1009	0.1444	0.5577	0.197
209.578	2.30285e-09	0.1008	0.1442	0.5583	0.1967
209.964	2.31046e-09	0.1041	0.1429	0.5543	0.1987
210.351	2.31168e-09	0.1039	0.1428	0.5549	0.1984
210.739	2.31291e-09	0.1038	0.1427	0.5555	0.1981
211.127	2.31414e-09	0.1036	0.1425	0.5561	0.1977
211.516	2.31537e-09	0.1034	0.1424	0.5567	0.1974
211.906	2.31661e-09	0.1033	0.1423	0.5573	0.1971
212.297	2.31784e-09	0.1031	0.1422	0.5579	0.1968
212.688	2.31907e-09	0.103	0.1421	0.5585	0.1965
213.08	2.32031e-09	0.1028	0.1419	0.5591	0.1962
213.466	2.32784e-09	0.1061	0.1407	0.5552	0.1981
213.853	2.32907e-09	0.1059	0.1405	0.5558	0.1978
214.241	2.3303e-09	0.1057	0.1404	0.5564	0.1975
214.63	2.33153e-09	0.1056	0.1403	0.557	0.1971
215.019	2.33277e-09	0.1054	0.1402	0.5575	0.1968
215.409	2.334e-09	0.1052	0.1401	0.5581	0.1965
215.799	2.33523e-09	0.1051	0.14	0.5587	0.1962
216.191	2.33647e-09	0.1049	0.1398	0.5593	0.1959
216.583	2.3377e-09	0.1047	0.1397	0.5599	0.1956
216.969	2.34553e-09	0.1082	0.1384	0.5558	0.1976
217.356	2.34676e-09	0.108	0.1383	0.5564	0.1972
217.744	2.348e-09	0.1078	0.1382	0.557	0.1969
218.132	2.34923e-09	0.1077	0.1381	0.5576	0.1966
218.521	2.35046e-09	0.1075	0.138	0.5582	0.1963
218.911	2.35169e-09	0.1073	0.1379	0.5588	0.196
219.302	2.35293e-09	0.1072	0.1377	0.5594	0.1957
219.693	2.35417e-09	0.107	0.1376	0.56	0.1954
220.085	2.3554e-09	0.1068	0.1375	0.5606	0.1951
220.472	2.36288e-09	0.11	0.1363	0.5567	0.197
220.859	2.36411e-09	0.1098	0.1362	0.5573	0.1966
221.246	2.36534e-09	0.1097	0.1361	0.5579	0.1963
221.635	2.36657e-09	0.1095	0.136	0.5585	0.196
222.024	2.36781e-09	0.1093	0.1359	0.5591	0.1957
222.414	2.36904e-09	0.1091	0.1358	0.5597	0.1954
222.804	2.37028e-09	0.109	0.1357	0.5602	0.1951
223.196	2.37152e-09	0.1088	0.1355	0.5608	0.1948
223.588	2.37275e-09	0.1086	0.1354	0.5614	0.1945
223.974	2.38052e-09	0.112	0.1342	0.5574	0.1964
224.361	2.38176e-09	0.1118	0.1341	0.558	0.1961
224.749	2.38299e-09	0.1116	0.134	0.5586	0.1958
225.138	2.38422e-09	0.1114	0.1339	0.5591	0.1955
225.527	2.38546e-09	0.1113	0.1338	0.5597	0.1952
225.917	2.38669e-09	0.1111	0.1337	0.5603	0.1949
226.307	2.38793e-09	0.1109	0.1336	0.5609	0.1946
226.698	2.38917e-09	0.1107	0.1335	0.5615	0.1943
227.09	2.39041e-09	0.1106	0.1334	0.562	0.194
227.477	2.39839e-09	0.114	0.1321	0.5579	0.1959
227.864	2.39962e-09	0.1138	0.132	0.5585	0.1956
228.252	2.40086e-09	0.1137	0.1319	0.5591	0.1953
228.64	2.40209e-09	0.1135	0.1318	0.5596	0.195
229.029	2.40333e-09	0.1133	0.1317	0.5602	0.1947
229.419	2.40457e-09	0.1131	0.1316	0.5608	0.1944
229.81	2.4058e-09	0.113	0.1315	0.5614	0.1941
230.201	2.40704e-09	0.1128	0.1314	0.5619	0.1938
230.593	2.40828e-09	0.1126	0.1313	0.5625	0.1935
230.979	2.41602e-09	0.1158	0.1301	0.5586	0.1954
231.366	2.41725e-09	0.1156	0.13	0.5591	0.1951
231.754	2.41849e-09	0.1155	0.1299	0.5597	0.1948
232.143	2.41972e-09	0.1153	0.1298	0.5603	0.1945
232.532	2.42096e-09	0.1151	0.1297	0.5609	0.1942
232.922	2.4222e-09	0.1149	0.1297	0.5614	0.1939
233.312	2.42344e-09	0.1148	0.1296	0.562	0.1936
233.703	2.42468e-09	0.1146	0.1295	0.5626	0.1933
234.095	2.42592e-09	0.1144	0.1294	0.5632	0.1931
234.482	2.43349e-09	0.1175	0.1282	0.5593	0.1949
234.869	2.43473e-09	0.1173	0.1281	0.5599	0.1946
235.257	2.43597e-09	0.1172	0.1281	0.5605	0.1943
235.645	2.4372e-09	0.117	0.128	0.5611	0.194
236.035	2.43844e-09	0.1168	0.1279	0.5616	0.1937
236.424	2.43968e-09	0.1166	0.1278	0.5622	0.1934
236.815	2.44092e-09	0.1165	0.1277	0.5628	0.1931
237.206	2.44216e-09	0.1163	0.1276	0.5633	0.1928
237.598	2.4434e-09	0.1161	0.1275	0.5639	0.1925
237.984	2.4513e-09	0.1194	0.1263	0.5599	0.1944
238.372	2.45254e-09	0.1192	0.1263	0.5604	0.1941
238.759	2.45378e-09	0.119	0.1262	0.561	0.1938
239.148	2.45501e-09	0.1188	0.1261	0.5616	0.1935
239.537	2.45625e-09	0.1186	0.126	0.5621	0.1932
239.927	2.45749e-09	0.1185	0.1259	0.5627	0.1929
240.317	2.45873e-09	0.1183	0.1258	0.5633	0.1926
240.708	2.45998e-09	0.1181	0.1257	0.5638	0.1924
241.1	2.46122e-09	0.1179	0.1256	0.5644	0.1921
241.487	2.46903e-09	0.1211	0.1245	0.5605	0.1939
241.874	2.47027e-09	0.1209	0.1244	0.561	0.1936
242.262	2.47151e-09	0.1207	0.1243	0.5616	0.1933
242.651	2.47275e-09	0.1206	0.1242	0.5622	0.193
243.04	2.47399e-09	0.1204	0.1241	0.5627	0.1928
243.429	2.47523e-09	0.1202	0.1241	0.5633	0.1925
243.82	2.47647e-09	0.12	0.124	0.5638	0.1922
244.211	2.47771e-09	0.1198	0.1239	0.5644	0.1919
244.603	2.47895e-09	0.1196	0.1238	0.5649	0.1916
244.989	2.487e-09	0.1229	0.1227	0.5609	0.1935
245.377	2.48824e-09	0.1227	0.1226	0.5614	0.1932
245.765	2.48948e-09	0.1226	0.1225	0.562	0.1929
246.153	2.49072e-09	0.1224	0.1224	0.5626	0.1926
246.542	2.49196e-09	0.1222	0.1223	0.5631	0.1923
246.932	2.4932e-09	0.122	0.1222	0.5637	0.192
247.322	2.49444e-09	0.1218	0.1222	0.5642	0.1918
247.713	2.49569e-09	0.1217	0.1221	0.5648	0.1915
248.105	2.49693e-09	0.1215	0.122	0.5653	0.1912
248.492	2.50469e-09	0.1245	0.121	0.5615	0.193
248.879	2.50593e-09	0.1243	0.1209	0.562	0.1927
249.267	2.50717e-09	0.1242	0.1208	0.5626	0.1924
249.656	2.50841e-09	0.124	0.1207	0.5632	0.1921
250.045	2.50965e-09	0.1238	0.1206	0.5637	0.1919
250.435	2.51089e-09	0.1236	0.1205	0.5643	0.1916
250.825	2.51214e-09	0.1234	0.1204	0.5648	0.1913
251.216	2.51338e-09	0.1232	0.1204	0.5654	0.191
251.608	2.51463e-09	0.1231	0.1203	0.5659	0.1907
251.994	2.52259e-09	0.1262	0.1192	0.5619	0.1926
252.382	2.52383e-09	0.126	0.1192	0.5625	0.1923
252.77	2.52507e-09	0.1258	0.1191	0.5631	0.192
253.158	2.52631e-09	0.1257	0.119	0.5636	0.1917
253.547	2.52755e-09	0.1255	0.1189	0.5641	0.1914
253.937	2.5288e-09	0.1253	0.1188	0.5647	0.1912
254.328	2.53004e-09	0.1251	0.1188	0.5652	0.1909
254.719	2.53129e-09	0.1249	0.1187	0.5658	0.1906
255.11	2.53253e-09	0.1247	0.1186	0.5663	0.1903
255.497	2.54043e-09	0.1278	0.1176	0.5624	0.1921
255.884	2.54167e-09	0.1276	0.1175	0.563	0.1919
256.272	2.54291e-09	0.1274	0.1174	0.5635	0.1916
256.661	2.54415e-09	0.1272	0.1173	0.5641	0.1913
257.05	2.5454e-09	0.1271	0.1173	0.5646	0.191
257.44	2.54664e-09	0.1269	0.1172	0.5652	0.1907
257.83	2.54789e-09	0.1267	0.1171	0.5657	0.1905
258.221	2.54913e-09	0.1265	0.117	0.5663	0.1902
258.613	2.55038e-09	0.1263	0.117	0.5668	0.1899
258.999	2.55821e-09	0.1293	0.116	0.563	0.1917
259.387	2.55945e-09	0.1291	0.1159	0.5635	0.1914
259.775	2.56069e-09	0.129	0.1158	0.5641	0.1911
260.163	2.56194e-09	0.1288	0.1157	0.5646	0.1909
260.553	2.56318e-09	0.1286	0.1157	0.5652	0.1906
260.942	2.56443e-09	0.1284	0.1156	0.5657	0.1903
261.333	2.56567e-09	0.1282	0.1155	0.5662	0.19
261.724	2.56692e-09	0.128	0.1154	0.5668	0.1897
262.115	2.56817e-09	0.1278	0.1154	0.5673	0.1895
262.502	2.57619e-09	0.1309	0.1144	0.5634	0.1913
262.889	2.57744e-09	0.1307	0.1143	0.5639	0.191
263.277	2.57868e-09	0.1306	0.1142	0.5645	0.1907
263.666	2.57992e-09	0.1304	0.1142	0.565	0.1905
264.055	2.58117e-09	0.1302	0.1141	0.5655	0.1902
264.445	2.58242e-09	0.13	0.114	0.5661	0.1899
264.835	2.58366e-09	0.1298	0.1139	0.5666	0.1896
265.226	2.58491e-09	0.1296	0.1139	0.5671	0.1894
265.618	2.58616e-09	0.1294	0.1138	0.5677	0.1891
266.005	2.5939e-09	0.1323	0.1129	0.564	0.1908
266.392	2.59515e-09	0.1321	0.1128	0.5645	0.1906
266.78	2.59639e-09	0.1319	0.1127	0.565	0.1903
267.169	2.59764e-09	0.1317	0.1127	0.5656	0.19
267.558	2.59888e-09	0.1316	0.1126	0.5661	0.1897
267.948	2.60013e-09	0.1314	0.1125	0.5666	0.1895
268.338	2.60138e-09	0.1312	0.1124	0.5672	0.1892
268.729	2.60262e-09	0.131	0.1124	0.5677	0.1889
269.12	2.60387e-09	0.1308	0.1123	0.5682	0.1887
269.507	2.61183e-09	0.1338	0.1114	0.5644	0.1904
269.895	2.61307e-09	0.1336	0.1113	0.5649	0.1902
270.283	2.61432e-09	0.1334	0.1112	0.5654	0.1899
270.671	2.61557e-09	0.1332	0.1112	0.566	0.1896
271.06	2.61681e-09	0.133	0.1111	0.5665	0.1894
271.45	2.61806e-09	0.1328	0.111	0.567	0.1891
271.84	2.61931e-09	0.1326	0.111	0.5676	0.1888
272.231	2.62056e-09	0.1325	0.1109	0.5681	0.1885
272.623	2.62181e-09	0.1323	0.1108	0.5686	0.1883
273.01	2.62995e-09	0.1353	0.1099	0.5647	0.1901
273.397	2.63119e-09	0.1351	0.1098	0.5652	0.1898
273.785	2.63244e-09	0.1349	0.1098	0.5657	0.1895
274.174	2.63368e-09	0.1347	0.1097	0.5663	0.1893
274.563	2.63493e-09	0.1346	0.1096	0.5668	0.189
274.953	2.63618e-09	0.1344	0.1096	0.5673	0.1887
275.343	2.63743e-09	0.1342	0.1095	0.5678	0.1885
275.734	2.63868e-09	0.134	0.1094	0.5684	0.1882
276.125	2.63993e-09	0.1338	0.1094	0.5689	0.1879
276.512	2.64782e-09	0.1367	0.1085	0.5651	0.1897
276.9	2.64907e-09	0.1365	0.1084	0.5657	0.1894
277.288	2.65032e-09	0.1363	0.1083	0.5662	0.1892
277.676	2.65156e-09	0.1361	0.1083	0.5667	0.1889
278.066	2.65281e-09	0.1359	0.1082	0.5672	0.1886
278.455	2.65406e-09	0.1357	0.1081	0.5678	0.1884
278.845	2.65531e-09	0.1355	0.1081	0.5683	0.1881
279.236	2.65656e-09	0.1353	0.108	0.5688	0.1878
279.628	2.65781e-09	0.1351	0.108	0.5693	0.1876
280.015	2.66583e-09	0.1381	0.1071	0.5655	0.1893
280.402	2.66707e-09	0.1379	0.107	0.566	0.1891
280.79	2.66832e-09	0.1377	0.1069	0.5666	0.1888
281.179	2.66957e-09	0.1375	0.1069	0.5671	0.1885
281.568	2.67082e-09	0.1373	0.1068	0.5676	0.1883
281.958	2.67207e-09	0.1371	0.1068	0.5681	0.188
282.348	2.67332e-09	0.1369	0.1067	0.5686	0.1877
282.739	2.67457e-09	0.1367	0.1066	0.5692	0.1875
283.13	2.67582e-09	0.1365	0.1066	0.5697	0.1872
283.517	2.68383e-09	0.1394	0.1057	0.5659	0.189
283.905	2.68507e-09	0.1392	0.1057	0.5664	0.1887
284.293	2.68632e-09	0.139	0.1056	0.5669	0.1885
284.681	2.68757e-09	0.1388	0.1055	0.5674	0.1882
285.071	2.68882e-09	0.1386	0.1055	0.568	0.1879
285.46	2.69007e-09	0.1384	0.1054	0.5685	0.1877
285.851	2.69132e-09	0.1382	0.1054	0.569	0.1874
286.241	2.69257e-09	0.138	0.1053	0.5695	0.1871
286.633	2.69383e-09	0.1378	0.1052	0.57	0.1869
287.02	2.70178e-09	0.1407	0.1044	0.5663	0.1886
287.407	2.70303e-09	0.1405	0.1043	0.5668	0.1884
287.795	2.70428e-09	0.1403	0.1043	0.5673	0.1881
288.184	2.70553e-09	0.1401	0.1042	0.5678	0.1878
288.573	2.70678e-09	0.1399	0.1042	0.5683	0.1876
288.963	2.70803e-09	0.1397	0.1041	0.5689	0.1873
289.353	2.70929e-09	0.1395	0.104	0.5694	0.1871
289.744	2.71054e-09	0.1393	0.104	0.5699	0.1868
290.135	2.71179e-09	0.1391	0.1039	0.5704	0.1865
290.522	2.71985e-09	0.142	0.1031	0.5666	0.1883
290.91	2.7211e-09	0.1418	0.103	0.5671	0.188
291.298	2.72235e-09	0.1416	0.103	0.5676	0.1878
291.687	2.7236e-09	0.1414	0.1029	0.5682	0.1875
292.076	2.72485e-09	0.1412	0.1029	0.5687	0.1872
292.465	2.72611e-09	0.141	0.1028	0.5692	0.187
292.856	2.72736e-09	0.1408	0.1028	0.5697	0.1867
293.246	2.72861e-09	0.1406	0.1027	0.5702	0.1865
293.638	2.72987e-09	0.1404	0.1026	0.5707	0.1862
294.025	2.73773e-09	0.1431	0.1019	0.5671	0.1879
294.412	2.73898e-09	0.1429	0.1018	0.5676	0.1877
294.801	2.74023e-09	0.1428	0.1017	0.5681	0.1874
295.189	2.74148e-09	0.1426	0.1017	0.5686	0.1871
295.578	2.74273e-09	0.1424	0.1016	0.5691	0.1869
295.968	2.74398e-09	0.1422	0.1016	0.5696	0.1866
296.358	2.74524e-09	0.142	0.1015	0.5701	0.1864
296.749	2.74649e-09	0.1418	0.1015	0.5706	0.1861
297.14	2.74775e-09	0.1416	0.1014	0.5711	0.1859
297.527	2.75576e-09	0.1444	0.1006	0.5674	0.1876
297.915	2.75701e-09	0.1442	0.1006	0.5679	0.1873
298.303	2.75826e-09	0.144	0.1005	0.5684	0.1871
298.692	2.75952e-09	0.1438	0.1005	0.5689	0.1868
299.081	2.76077e-09	0.1436	0.1004	0.5694	0.1866
299.471	2.76202e-09	0.1434	0.1004	0.5699	0.1863
299.861	2.76328e-09	0.1432	0.1003	0.5704	0.1861
300.251	2.76453e-09	0.143	0.1003	0.5709	0.1858
300.643	2.76579e-09	0.1428	0.1002	0.5714	0.1855
301.03	2.77395e-09	0.1456	0.0994	0.5677	0.1873
301.417	2.7752e-09	0.1454	0.0994	0.5682	0.187
301.806	2.77645e-09	0.1452	0.0993	0.5687	0.1868
302.194	2.7777e-09	0.145	0.0993	0.5692	0.1865
302.583	2.77896e-09	0.1448	0.0992	0.5697	0.1863
302.973	2.78021e-09	0.1446	0.0992	0.5702	0.186
303.363	2.78147e-09	0.1444	0.0991	0.5707	0.1858
303.754	2.78272e-09	0.1442	0.0991	0.5712	0.1855
304.145	2.78398e-09	0.1441	0.099	0.5717	0.1853
304.532	2.79201e-09	0.1468	0.0982	0.568	0.1869
304.92	2.79326e-09	0.1466	0.0982	0.5685	0.1867
305.308	2.79451e-09	0.1464	0.0981	0.569	0.1864
305.697	2.79577e-09	0.1462	0.0981	0.5695	0.1862
306.086	2.79702e-09	0.146	0.098	0.57	0.1859
306.476	2.79828e-09	0.1458	0.098	0.5705	0.1857
306.866	2.79953e-09	0.1456	0.0979	0.571	0.1854
307.256	2.80079e-09	0.1454	0.0979	0.5715	0.1852
307.648	2.80205e-09	0.155	0.0978	0.5706	0.1844
308.035	2.8033e-09	0.1548	0.0978	0.5711	0.1842
308.423	2.80455e-09	0.1546	0.0977	0.5716	0.184
308.811	2.8058e-09	0.1544	0.0977	0.5721	0.1837
309.199	2.80706e-09	0.1542	0.0977	0.5725	0.1835
309.589	2.80831e-09	0.154	0.0976	0.573	0.1833
309.978	2.80957e-09	0.1538	0.0976	0.5735	0.183
310.368	2.81082e-09	0.1536	0.0975	0.5739	0.1828
310.759	2.81208e-09	0.1561	0.0975	0.5705	0.1844
311.15	2.81333e-09	0.1559	0.0974	0.571	0.1842
311.537	2.81459e-09	0.1557	0.0974	0.5714	0.184
311.925	2.81584e-09	0.1555	0.0973	0.5719	0.1837
312.313	2.81709e-09	0.1553	0.0973	0.5724	0.1835
312.702	2.81835e-09	0.1551	0.0972	0.5728	0.1833
313.091	2.8196e-09	0.1549	0.0972	0.5733	0.183
313.481	2.82085e-09	0.1547	0.0971	0.5738	0.1828
313.871	2.82211e-09	0.1545	0.0971	0.5742	0.1826
314.262	2.82337e-09	0.1568	0.097	0.571	0.1841
314.653	2.82462e-09	0.1566	0.097	0.5715	0.1838
315.04	2.82588e-09	0.1564	0.0969	0.572	0.1836
315.428	2.82713e-09	0.1562	0.0969	0.5724	0.1834
315.816	2.82838e-09	0.156	0.0968	0.5729	0.1831
316.205	2.82964e-09	0.1558	0.0968	0.5734	0.1829
316.594	2.83089e-09	0.1556	0.0968	0.5738	0.1827
316.983	2.83215e-09	0.1554	0.0967	0.5743	0.1824
317.373	2.8334e-09	0.1552	0.0967	0.5748	0.1822
317.764	2.83466e-09	0.155	0.0966	0.5752	0.182
318.155	2.83592e-09	0.1548	0.0966	0.5757	0.1817
318.542	2.83717e-09	0.1546	0.0965	0.5761	0.1815
318.93	2.83842e-09	0.1544	0.0965	0.5766	0.1813
319.318	2.83967e-09	0.1542	0.0964	0.5771	0.1811
319.707	2.84093e-09	0.154	0.0964	0.5775	0.1808
320.096	2.84218e-09	0.1539	0.0963	0.578	0.1806
320.486	2.84344e-09	0.1537	0.0963	0.5784	0.1804
320.876	2.84469e-09	0.1535	0.0962	0.5789	0.1801
321.267	2.84595e-09	0.1533	0.0962	0.5793	0.1799
321.658	2.84721e-09	0.1531	0.0962	0.5798	0.1797
322.045	2.84846e-09	0.1529	0.0961	0.5802	0.1795
322.433	2.84971e-09	0.1527	0.0961	0.5807	0.1792
322.821	2.85097e-09	0.1525	0.096	0.5811	0.179
323.21	2.85222e-09	0.1523	0.096	0.5816	0.1788
323.599	2.85348e-09	0.1521	0.0959	0.582	0.1786
323.988	2.85473e-09	0.1519	0.0959	0.5825	0.1783
324.379	2.85599e-09	0.1517	0.0958	0.5829	0.1781
324.769	2.85724e-09	0.1597	0.0958	0.5714	0.1835
325.16	2.8585e-09	0.1595	0.0957	0.5719	0.1832
325.547	2.85975e-09	0.1593	0.0957	0.5724	0.183
325.935	2.86101e-09	0.1591	0.0957	0.5728	0.1828
326.323	2.86226e-09	0.1589	0.0956	0.5733	0.1825
326.712	2.86352e-09	0.1587	0.0956	0.5737	0.1823
327.101	2.86477e-09	0.1585	0.0955	0.5742	0.1821
327.491	2.86603e-09	0.1583	0.0955	0.5746	0.1819
327.881	2.86728e-09	0.1581	0.0954	0.5751	0.1816
328.272	2.86854e-09	0.1579	0.0954	0.5756	0.1814
328.663	2.8698e-09	0.1577	0.0953	0.576	0.1812
329.05	2.87105e-09	0.1575	0.0953	0.5765	0.181
329.438	2.8723e-09	0.1573	0.0953	0.5769	0.1807
329.826	2.87356e-09	0.1571	0.0952	0.5774	0.1805
330.215	2.87481e-09	0.1569	0.0952	0.5778	0.1803
330.604	2.87607e-09	0.1567	0.0951	0.5783	0.1801
330.994	2.87732e-09	0.1566	0.0951	0.5787	0.1798
331.384	2.87858e-09	0.1564	0.095	0.5792	0.1796
331.774	2.87984e-09	0.1562	0.095	0.5796	0.1794
332.165	2.88109e-09	0.156	0.0949	0.5801	0.1792
332.553	2.93471e-09	0.1558	0.0899	0.5805	0.1789
332.94	2.93596e-09	0.1556	0.0899	0.5809	0.1787
333.329	2.93722e-09	0.1554	0.0898	0.5814	0.1785
333.717	2.93848e-09	0.1552	0.0898	0.5818	0.1783
334.106	2.93974e-09	0.155	0.0898	0.5823	0.1781
334.496	2.941e-09	0.1548	0.0897	0.5827	0.1778
334.886	2.94226e-09	0.1546	0.0897	0.5832	0.1776
335.277	2.94352e-09	0.1622	0.0897	0.5722	0.1827
335.668	2.94478e-09	0.162	0.0896	0.5726	0.1825
336.055	2.95277e-09	0.1618	0.089	0.5731	0.1823
336.443	2.95403e-09	0.1616	0.0889	0.5735	0.1821
336.831	2.95529e-09	0.1614	0.0889	0.574	0.1818
337.22	2.95655e-09	0.1612	0.0889	0.5744	0.1816
337.609	2.95781e-09	0.161	0.0888	0.5749	0.1814
337.999	2.95907e-09	0.1608	0.0888	0.5753	0.1812
338.389	2.96033e-09	0.1606	0.0888	0.5758	0.1809
338.779	2.96159e-09	0.1604	0.0887	0.5762	0.1807
339.17	2.96285e-09	0.1602	0.0887	0.5767	0.1805
339.558	2.97045e-09	0.16	0.0881	0.5771	0.1803
[truncated: 670 more rows]
