# Supplementary material for: Rapid growth of new atmospheric particles by nitric acid and ammonia condensation
Source: Nature. 2020 May 13;581(7807):184–9. doi: 10.1038/s41586-020-2270-4 (PMC7334196; doi:10.1038/s41586-020-2270-4)
Supplement: Supplementary file 11 — Source Data Extended Data Fig. 7 [file 41586_2020_2270_MOESM11_ESM.xlsx]

## Sheet: a
Region	CS_mean (s^-1)	CS_std (s^-1)	GR_mean (nm/h)	GR_std (nm/h)
Remote	0.0017	n/a	3	1.9
	0.00208182	0.000823187	2.92727	1.36021
	0.00048	n/a	2.5	1.7
	0.00053	n/a	3.7	n/a
	0.001	n/a	3.6	n/a
	0.0007	n/a	2.7	1.4
	0.0016	n/a	5.5	n/a
	0.0017	n/a	3.9	2
Urban: Europe	0.0051	n/a	3.3925	n/a
	0.0073	0.0008	6.1	1.8
	0.0135	n/a	6.82	n/a
	0.004531	0.00217468	5.3	1.87931
	0.005775	0.000865544	7.42	0.920231
Urban: Asia	0.0286667	n/a	3.2	n/a
	0.027	0.021	5.2	2.2
	0.0215917	0.013044	5.175	3.52372
	0.0220909	0.0173258	6.5095	4.48309
	0.0156471	0.00422701	5.5625	1.95546
	0.0277	0.00569698	7.63	1.24191
	0.024	n/a	8.5	n/a
	0.023375	0.00667485	7.61667	1.6999
	0.06	0.0239317	11.4	9.72359
	0.02	n/a	8	n/a
	0.0071	0.0046	4.1	2
	0.0575	0.00886405	14.925	1.83595
Urban: North America	0.1275	0.0235	26	5.6
	0.0818611	0.0306184	22.5854	12.311
	0.0740833	0.0129188	19.9869	6.49881
	0.02265	0.00537238	5.41926	1.04294
	0.0215	n/a	5	1

## Sheet: b
Region	CS×10^4/GR (h nm^-1 s^-1)	J_mean (cm^-3 s^-1)	J_std (cm^-3 s^-1)
Remote	5.66667	0.8	0.7
	7.1118	0.609091	0.262505
	1.92	0.1	0.13
	1.43243	0.15	n/a
	2.77778	0.85	n/a
	2.59259	0.2	0.3
	2.90909	0.4	n/a
	4.35897	0.4	0.4
Urban: Europe	15.0332	2.0029	n/a
	11.9672	n/a	n/a
	19.7947	5.89	n/a
	8.54906	1.17	0.434768
	7.78302	1.3	0.403516
Urban: Asia	89.5833	n/a	n/a
	51.9231	10.8	n/a
	41.723	10.725	6.23788
	33.9364	n/a	n/a
	28.1295	3.88824	3.52826
	36.3041	3.66	1.64803
	28.2353	1.1	n/a
	30.6893	n/a	n/a
	52.6316	8.7	5.15817
	25	n/a	n/a
	17.3171	1.2	2.3
	38.526	7.3375	3.89906
Urban: North America	49.0385	283	121
	36.2452	n/a	n/a
	37.0659	n/a	n/a
	41.7954	n/a	n/a
	43	n/a	n/a
